# Supplementary material for: Synthesis of polycyclic naphthols and naphthalenes via tandem Ti(Oi-Pr)4-promoted photoenolization Diels–Alder reaction and aromatization
Source: Royal Society of Chemistry journal article supplement (doi:10.1039/d0qo01346c), 2021-01-01

## *Supporting Information*

### **Synthesis of polycyclic naphthols and naphthalenes via tandem Ti(Oi-Pr)<sub>4</sub>-promoted photoenolization Diels–Alder reaction and aromatization**

Xiao-Long Lu,<sup>a</sup> Baochao Yang,<sup>a</sup> Haibing He,<sup>\*b</sup> Shuanhu Gao<sup>\*a, b</sup>

<sup>a</sup>Shanghai Key Laboratory of Green Chemistry and Chemical Processes, School of Chemistry and Molecular Engineering,  
East China Normal University, 3663N Zhongshan Road, Shanghai 200062, China

<sup>b</sup>Shanghai Engineering Research Center of Molecular Therapeutics and New Drug Development, East  
China Normal University, 3663N Zhongshan Road, Shanghai 200062, China

Email: hbhe@chem.ecnu.edu.cn, shgao@chem.ecnu.edu.cn

### **Index**

|                                                                                                          |    |
|----------------------------------------------------------------------------------------------------------|----|
| General experimental procedures .....                                                                    | 2  |
| Screening conditions of PEDA reaction .....                                                              | 3  |
| Experimental procedures and spectroscopic data of PEDA/oxidation/aromatization sequence .....            | 3  |
| Experimental procedures and spectroscopic data of synthesis of the isomer of garveatin C .....           | 17 |
| Experimental procedures and spectroscopic data of PEDA/dehydration/aromatization sequence .....          | 19 |
| Experimental procedures and spectroscopic data of synthesis of the B-C-D-E skeleton of exiguaquinol..... | 31 |
| References.....                                                                                          | 36 |
| <sup>1</sup> H and <sup>13</sup> C NMR spectra of the synthetic intermediates and products .....         | 37 |

## General experimental procedures

All reactions were carried out under an inert nitrogen atmosphere with dry solvents under anhydrous conditions unless otherwise noted. Anhydrous dichloromethane and toluene were purified by the PS-MD-5 (Innovative Technology) solvent purification system. Dimethyl sulfoxide used for IBX oxidation was purchased from commercially available anhydrous solvent. Anhydrous 1,4-dioxane was distilled from sodium. TLC analyses were performed on EMD 250  $\mu\text{m}$  Silica Gel HSGF<sub>254</sub> plates and visualized by quenching of UV fluorescence ( $\lambda_{\text{max}} = 254 \text{ nm}$ ), or by staining phosphomolybdic acid, or potassium permanganate. Flash column chromatography was performed as described by Still<sup>[1]</sup>, employing SiliCycle UltraPure Silica Gels: SilicaFlash<sup>®</sup> P60 40 – 63  $\mu\text{m}$  (230 – 400 mesh). <sup>1</sup>H and <sup>13</sup>C NMR spectra were recorded on a Bruker-500, 400 spectrometers. Chemical shifts for <sup>1</sup>H and <sup>13</sup>C NMR spectra are reported in ppm ( $\delta$ ) relative to residue protium in the solvent (CDCl<sub>3</sub>:  $\delta$  7.26, 77.0 ppm;) and the multiplicities are presented as follows: s = singlet, d = doublet, t = triplet, q = quartet, m = multiplet, br = broad. High-resolution mass spectra (HRMS) were acquired on Waters Micromass GCT Premier or Bruker Daltonics, Inc. APEXIII 7.0 TESLA FTMS. Mass spectra were acquired on Agilent 5975C. Infrared (IR) spectra was obtained using a Shimadzu IRTracer-100 fourier transform infrared spectroscopy (FTIR).

## Screening conditions of PEDA reaction

**Table S1.** Screening conditions using **6c** and **7h** as reactants

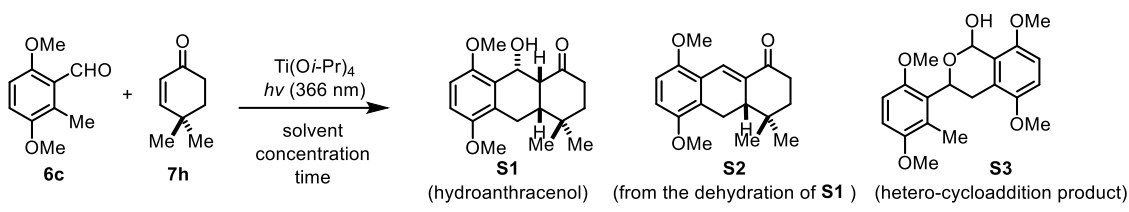

| entry | 6c         | 7h         | solvent     | concentration | Ti(O <i>i</i> -Pr) <sub>4</sub> | time | result <sup>a</sup>                                                               |
|-------|------------|------------|-------------|---------------|---------------------------------|------|-----------------------------------------------------------------------------------|
| 1     | 1.5 equiv. | 1.0 equiv. | toluene     | 0.03 M        | 0                               | 1 h  | <b>7h+S3</b>                                                                      |
| 2     | 1.5 equiv. | 1.0 equiv. | toluene     | 0.03 M        | 2.0 equiv.                      | 1 h  | trace <b>S1</b> ; <b>6c:7h:S2</b> = 3.2:1.7:1.0                                   |
| 3     | 1.0 equiv. | 2.0 equiv. | toluene     | 0.03 M        | 2.0 equiv.                      | 3 h  | trace <b>S1</b> ; <b>6c:7h:S2</b> = 0.8:3.0:1.0                                   |
| 4     | 1.0 equiv. | 2.0 equiv. | toluene     | 0.03 M        | 3.0 equiv.                      | 3 h  | trace <b>S1</b> ; <b>6c:7h:S2</b> = 0.9:2.5:1.0                                   |
| 5     | 1.0 equiv. | 2.0 equiv. | toluene     | 0.02 M        | 2.0 equiv.                      | 3 h  | trace <b>S1</b> ; <b>6c:7h:S2</b> = 0.1:3.4:1<br>25% isolated yield for <b>S2</b> |
| 6     | 1.0 equiv. | 2.0 equiv. | 1,4-dioxane | 0.02 M        | 2.0 equiv.                      | 3 h  | <b>6c:7h:S1:S2</b> = 0.05:6.2:0.6:1                                               |

<sup>a</sup> The ration of SM and products were determined by <sup>1</sup>H NMR spectroscopic crude analysis.

## Experimental procedures and spectroscopic data of PEDA/oxidation/aromatization sequence

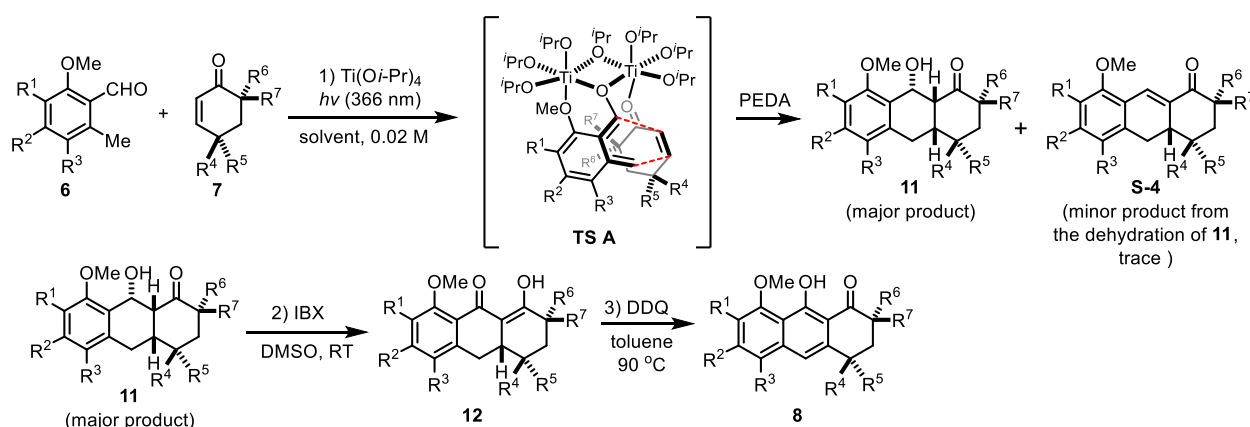

**General procedure A for PEDA reaction and oxidation:** Step 1: To a solution of dienophile **7** (1.0 equiv.) and aromatic aldehyde **6** (1.5 equiv.) in anhydrous and degassed solvent as indicated below (concentration for dienophile is 0.02 M) in quartz tube sealed with rubber plug was added titanium(IV) isopropoxide (2.0 equiv.) under nitrogen, after homogeneous mixing, the solution was photolyzed at room temperature in a Rayonet chamber reactor (16 lamps) at 366 nm until the dienophile **7** was completely consumed by TLC analysis. Then saturated NaHCO<sub>3</sub> was added to the solution and stirred for 5 minutes. The mixture was filtered through silica gel and washed with ethyl acetate for six times, separated the organic layer and washed with brine. The organic layer was dried over anhydrous sodium sulfate, concentrated, and purified by silica gel flash chromatography to obtain the corresponding hydroanthracenol product **11**.

Step 2: To a 0.02 M stirred solution of compound **11** in anhydrous DMSO was added IBX (2.0 equiv.) at room temperature and stirred at room temperature until the starting material was consumed completely by TLC

analysis. Then the mixture was quenched with saturated Na<sub>2</sub>SO<sub>3</sub>/NaHCO<sub>3</sub> (v/v = 1:1) at 0 °C and extracted with ethyl acetate for three times. The combined organic layer was washed with brine, dried over anhydrous sodium sulfate, concentrated, and purified by silica gel column chromatography to give the corresponding product **12**.

**General procedure B for aromatization:** To a 0.01 M stirred solution of the compound **12** in anhydrous toluene was added DDQ (3.0 equiv.) at room temperature and stirred at 90 °C until the starting material was consumed completely by TLC analysis. Then the mixture was quenched with saturated Na<sub>2</sub>SO<sub>3</sub>/NaHCO<sub>3</sub> (v/v = 1:1) solution at 0 °C and extracted with ethyl acetate for three times. The combined organic layers were washed with saturated Na<sub>2</sub>SO<sub>3</sub>/NaHCO<sub>3</sub> (v/v = 1:1), brine, dried over anhydrous sodium sulfate, concentrated, and purified by silica gel flash chromatography to obtain the corresponding naphthol product **8**.

All starting materials **6** and **7** are known compounds except **7b** and **7c**.

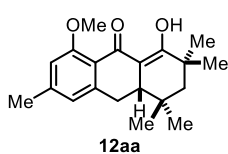

Compound **12aa** (107 mg, 51% yield for two steps) was prepared according to general procedure A from **7a** (102 mg, 0.67 mmol, 1.0 equiv.) and aldehyde **6a** (164 mg, 1.0 mmol, 1.5 equiv.). The PEDA reaction time was 45 minutes under  $\lambda_{\max} = 366$  nm UV light using

anhydrous 1, 4-dioxane as solvent.  $R_f = 0.38$  (10% ethyl acetate – petroleum ether); White solid, m.p. 161 – 164 °C; <sup>1</sup>H NMR (400 MHz, Chloroform-*d*)  $\delta$  17.06 (s, 1H), 6.65 (s, 1H), 6.61 (s, 1H), 3.90 (s, 3H), 2.62 – 2.40 (m, 3H), 2.34 (s, 3H), 1.51 (s, 2H), 1.31 (s, 3H), 1.17 (s, 3H), 1.00 (s, 3H), 0.96 (s, 3H) ppm; <sup>13</sup>C NMR (100 MHz, Chloroform-*d*)  $\delta$  188.8, 187.4, 159.7, 144.4, 144.3, 120.9, 118.2, 111.1, 106.1, 56.0, 52.5, 43.6, 36.7, 31.7, 31.4, 31.0, 29.7, 27.4, 22.0, 21.9 ppm; IR  $\nu_{\max}$  2957, 2912, 2845, 1705, 1608, 1481, 1215, 1097, 858, 835 cm<sup>-1</sup>; HRMS–EI (*m/z*): [M]<sup>+</sup> calculated for C<sub>20</sub>H<sub>26</sub>O<sub>3</sub>, 314.1882, found, 314.1885.

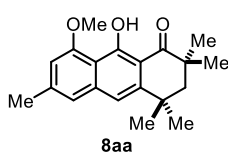

Compound **8aa** (102 mg, 96% yield) was prepared according to general procedure B from the above obtained compound **12aa**.  $R_f = 0.50$  (10% ethyl acetate – petroleum ether);

Yellow solid, m.p. 192 – 195 °C; <sup>1</sup>H NMR (400 MHz, Chloroform-*d*)  $\delta$  15.59 (s, 1H), 7.05 (s, 1H), 7.00 (s, 1H), 6.62 (s, 1H), 4.01 (s, 3H), 2.45 (s, 3H), 1.90 (s, 2H), 1.41 (s, 6H), 1.33 (s, 6H) ppm; <sup>13</sup>C NMR (100 MHz, Chloroform-*d*)  $\delta$  209.7, 166.2, 159.5, 147.6, 141.4, 140.8, 119.7, 113.4, 113.1, 108.9, 107.6, 56.1, 50.0, 41.4, 33.5, 32.5 (2C), 28.9 (2C), 22.1 ppm; IR  $\nu_{\max}$  2963, 2932, 1628, 1578, 1389, 1369, 1267, 1163, 1119, 1053 cm<sup>-1</sup>; HRMS–EI (*m/z*): [M]<sup>+</sup> calculated for C<sub>20</sub>H<sub>24</sub>O<sub>3</sub>, 312.1725, found, 312.1727.

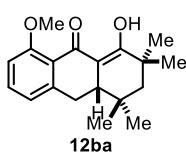

Compound **12ba** (41 mg, 34% yield for two steps) was prepared according to general procedure A from **7a** (61 mg, 0.4 mmol, 1.0 equiv.) and aldehyde **6b** (90 mg, 0.6 mmol, 1.5 equiv.). The PEDA reaction time was 60 minutes under  $\lambda_{\max} = 366$  nm UV light using

anhydrous 1, 4-dioxane as solvent.  $R_f = 0.44$  (10% ethyl acetate – petroleum ether); Light yellow solid, m.p.

122 – 124 °C;  $^1\text{H}$  NMR (400 MHz, Chloroform-*d*)  $\delta$  17.03 (s, 1H), 7.34 (t,  $J = 7.8$  Hz, 1H), 6.86 (d,  $J = 8.4$  Hz, 1H), 6.80 (d,  $J = 7.5$  Hz, 1H), 3.92 (s, 3H), 2.66 (dd,  $J = 13.1, 3.0$  Hz, 1H), 2.54 (t,  $J = 13.6$  Hz, 1H), 2.47 (dd,  $J = 14.1, 3.0$  Hz, 1H), 1.53 (s, 2H), 1.33 (s, 3H), 1.19 (s, 3H), 1.02 (s, 3H), 0.98 (s, 3H) ppm;  $^{13}\text{C}$  NMR (100 MHz, Chloroform-*d*)  $\delta$  189.7, 187.2, 159.6, 144.5, 133.2, 120.7, 120.1, 110.4, 106.4, 56.1, 52.5, 43.6, 36.8, 31.8, 31.5, 31.1, 29.7, 27.5, 22.0 ppm; IR  $\nu_{\text{max}}$  2978, 2906, 1718, 1682, 1593, 1560, 1267, 1194, 1097, 1082  $\text{cm}^{-1}$ ; HRMS–EI ( $m/z$ ):  $[\text{M}]^+$  calculated for  $\text{C}_{19}\text{H}_{24}\text{O}_3$ , 300.1725, found, 300.1728.

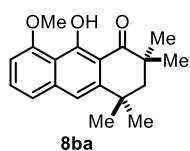

Compound **8ba** (35 mg, 85% yield) was prepared according to general procedure B from the above obtained compound **12ba**.  $R_f = 0.60$  (10% ethyl acetate – petroleum ether); Yellow solid, m.p. 130 – 132 °C;  $^1\text{H}$  NMR (400 MHz, Chloroform-*d*)  $\delta$  15.55 (s, 1H), 7.47 (t,  $J = 8.0$  Hz, 1H), 7.25 (d,  $J = 9.6$  Hz, 1H), 7.09 (s, 1H), 6.80 (d,  $J = 7.9$  Hz, 1H), 4.02 (s, 3H), 1.92 (s, 2H), 1.42 (s, 6H), 1.34 (s, 6H) ppm;  $^{13}\text{C}$  NMR (100 MHz, Chloroform-*d*)  $\delta$  210.1, 166.1, 159.7, 147.5, 140.6, 130.7, 120.1, 114.9, 114.0, 109.4, 105.5, 56.2, 49.8, 41.5, 33.6, 32.5 (2C), 28.9 (2C) ppm; IR  $\nu_{\text{max}}$  2982, 2907, 1749, 1680, 1579, 1570, 1265, 1193, 1167, 1101  $\text{cm}^{-1}$ ; HRMS–EI ( $m/z$ ):  $[\text{M}]^+$  calculated for  $\text{C}_{19}\text{H}_{22}\text{O}_3$ , 298.1569, found, 298.1566.

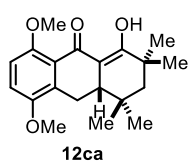

Compound **12ca** (75 mg, 34% yield for two steps) was prepared according to general procedure A from **7a** (102 mg, 0.67 mmol, 1.0 equiv.) and aldehyde **6c** (180 mg, 1.0 mmol, 1.5 equiv.). The PEDA reaction time was 45 minutes under  $\lambda_{\text{max}} = 366$  nm UV light using anhydrous 1, 4-dioxane as solvent.  $R_f = 0.36$  (10% ethyl acetate – petroleum ether); Yellow viscous oil;  $^1\text{H}$  NMR (400 MHz, Chloroform-*d*)  $\delta$  16.99 (s, 1H), 6.96 (d,  $J = 9.1$  Hz, 1H), 6.80 (d,  $J = 9.0$  Hz, 1H), 3.88 (s, 3H), 3.81 (s, 3H), 3.18 (dd,  $J = 15.2, 4.2$  Hz, 1H), 2.40 (dd,  $J = 14.4, 4.2$  Hz, 1H), 2.08 (t,  $J = 14.6$  Hz, 1H), 1.54 (s, 2H), 1.33 (s, 3H), 1.19 (s, 3H), 1.05 (s, 3H), 1.00 (s, 3H) ppm;  $^{13}\text{C}$  NMR (125 MHz, Chloroform-*d*)  $\delta$  190.2, 186.9, 153.6, 149.5, 132.7, 121.7, 115.3, 110.2, 106.5, 56.5, 56.2, 52.6, 43.0, 36.9, 31.9, 31.5, 29.8, 27.5, 22.5, 22.1 ppm; IR  $\nu_{\text{max}}$  2976, 2904, 1749, 1682, 1583, 1560, 1286, 1265, 1193, 1080  $\text{cm}^{-1}$ ; HRMS–EI ( $m/z$ ):  $[\text{M}]^+$  calculated for  $\text{C}_{20}\text{H}_{26}\text{O}_4$ , 330.1831, found, 330.1829.

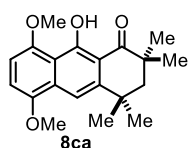

Compound **8ca** (72 mg, 97% yield) was prepared according to general procedure B from the above obtained compound **12ca**.  $R_f = 0.42$  (10% ethyl acetate – petroleum ether); Yellow solid, m.p. 144 – 146 °C;  $^1\text{H}$  NMR (400 MHz, Chloroform-*d*)  $\delta$  15.32 (s, 1H), 7.59 (s, 1H), 6.87 (d,  $J = 8.6$  Hz, 1H), 6.72 (d,  $J = 8.6$  Hz, 1H), 3.97 (s, 3H), 3.95 (s, 3H), 1.92 (s, 2H), 1.45 (s, 6H), 1.33 (s, 6H) ppm;  $^{13}\text{C}$  NMR (100 MHz, Chloroform-*d*)  $\delta$  210.4, 165.3, 153.3, 148.7, 147.2, 131.5, 115.7, 110.0, 108.7, 107.9, 105.5, 56.8, 55.9, 50.0, 41.7, 33.8, 32.7 (2C), 28.9 (2C) ppm; IR  $\nu_{\text{max}}$  2912, 1749, 1622, 1583,

1491, 1389, 1265, 1194, 1115, 1080  $\text{cm}^{-1}$ ; HRMS–EI ( $m/z$ ):  $[\text{M}]^+$  calculated for  $\text{C}_{20}\text{H}_{24}\text{O}_4$ , 328.1675, found, 328.1678.

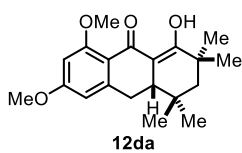

Compound **12da** (46 mg, 35% yield for two steps) was prepared according to general procedure A from **7a** (61 mg, 0.4 mmol, 1.0 equiv.) and aldehyde **6d** (108 mg, 0.6 mmol, 1.5 equiv.). The PEDA reaction time was 60 minutes under  $\lambda_{\text{max}} = 366 \text{ nm}$  UV light using anhydrous 1, 4-dioxane as solvent.  $R_f = 0.2$  (10% ethyl acetate – petroleum ether); Light yellow viscous oil;  $^1\text{H}$  NMR (400 MHz, Chloroform-*d*)  $\delta$  17.06 (s, 1H), 6.36 (d,  $J = 2.2 \text{ Hz}$ , 1H), 6.32 (d,  $J = 2.0 \text{ Hz}$ , 1H), 3.89 (s, 3H), 3.84 (s, 3H), 2.61 (dd,  $J = 13.6, 3.8 \text{ Hz}$ , 1H), 2.53 (t,  $J = 13.6 \text{ Hz}$ , 1H), 2.45 (dd,  $J = 13.7, 3.9 \text{ Hz}$ , 1H), 1.51 (s, 2H), 1.31 (s, 3H), 1.17 (s, 3H), 1.01 (s, 3H), 0.97 (s, 3H) ppm;  $^{13}\text{C}$  NMR (125 MHz, Chloroform-*d*)  $\delta$  187.7, 187.3, 163.6, 161.6, 146.6, 114.5, 105.6, 104.5, 97.4, 56.0, 55.4, 52.4, 43.5, 36.5, 31.8, 31.7, 31.4, 29.8, 27.4, 22.1 ppm; IR  $\nu_{\text{max}}$  2910, 1738, 1695, 1599, 1375, 1306, 1246, 1159, 1095, 1047  $\text{cm}^{-1}$ ; HRMS–EI ( $m/z$ ):  $[\text{M}]^+$  calculated for  $\text{C}_{20}\text{H}_{26}\text{O}_4$ , 330.1831, found, 330.1833.

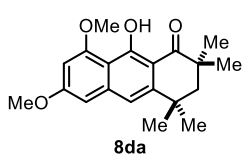

Compound **8da** (46 mg, quantitative yield) was prepared according to general procedure B from the above obtained compound **12da**.  $R_f = 0.38$  (10% ethyl acetate – petroleum ether); Yellow solid, m.p. 144 – 147  $^\circ\text{C}$ ;  $^1\text{H}$  NMR (400 MHz, Chloroform-*d*)  $\delta$  15.67 (s, 1H), 6.97 (s, 1H), 6.60 (d,  $J = 2.2 \text{ Hz}$ , 1H), 6.42 (d,  $J = 2.2 \text{ Hz}$ , 1H), 3.98 (s, 3H), 3.91 (s, 3H), 1.89 (s, 2H), 1.41 (s, 6H), 1.32 (s, 6H) ppm;  $^{13}\text{C}$  NMR (100 MHz, Chloroform-*d*)  $\delta$  209.3, 166.3, 161.8, 161.1, 148.3, 142.2, 113.3, 110.3, 108.2, 99.1, 97.9, 56.1, 55.4, 49.9, 41.3, 33.5, 32.5 (2C), 28.9 (2C) ppm; IR  $\nu_{\text{max}}$  2977, 1737, 1620, 1583, 1321, 1223, 1203, 1166, 1066, 937  $\text{cm}^{-1}$ ; HRMS–EI ( $m/z$ ):  $[\text{M}]^+$  calculated for  $\text{C}_{20}\text{H}_{24}\text{O}_4$ , 328.1675, found, 328.1679.

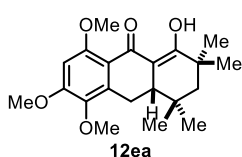

Compound **12ea** (55 mg, 38% yield for two steps) was prepared according to general procedure A from **7e** (61 mg, 0.4 mmol, 1.0 equiv.) and aldehyde **6a** (126 mg, 0.6 mmol, 1.5 equiv.). The PEDA reaction time was 60 minutes under  $\lambda_{\text{max}} = 366 \text{ nm}$  UV light using anhydrous 1, 4-dioxane as solvent.  $R_f = 0.30$  (10% ethyl acetate – petroleum ether); Light yellow solid, m.p. 167 – 169  $^\circ\text{C}$ ;  $^1\text{H}$  NMR (400 MHz, Chloroform-*d*)  $\delta$  17.05 (s, 1H), 6.40 (s, 1H), 3.92 (s, 3H), 3.91 (s, 3H), 3.72 (s, 3H), 3.16 (dd,  $J = 14.7, 3.8 \text{ Hz}$ , 1H), 2.35 (dd,  $J = 14.3, 3.8 \text{ Hz}$ , 1H), 2.11 (t,  $J = 14.5 \text{ Hz}$ , 1H), 1.52 (s, 2H), 1.31 (s, 3H), 1.17 (s, 3H), 1.04 (s, 3H), 1.00 (s, 3H) ppm;  $^{13}\text{C}$  NMR (100 MHz, Chloroform-*d*)  $\delta$  188.0, 187.3, 157.6, 156.7, 138.7, 137.5, 113.8, 105.7, 95.1, 60.8, 56.4, 55.7, 52.5, 43.2, 36.6, 31.8, 31.4, 29.8, 27.4, 23.2, 22.0 ppm; IR  $\nu_{\text{max}}$  2976, 1734, 1593, 1560, 1337, 1282, 1238, 1207, 1092, 1049  $\text{cm}^{-1}$ ; HRMS–EI ( $m/z$ ):  $[\text{M}]^+$  calculated for  $\text{C}_{21}\text{H}_{28}\text{O}_5$ , 360.1937, found, 360.1940.

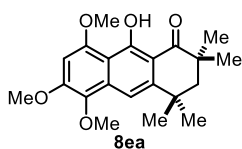

Compound **8ea** (44 mg, 81% yield) was prepared according to general procedure B from the above obtained compound **12ea**.  $R_f = 0.58$  (10% ethyl acetate – petroleum ether); Yellow solid, m.p. 107 – 109 °C;  $^1\text{H NMR}$  (400 MHz, Chloroform-*d*)  $\delta$  15.8 (s, 1H), 7.4

(s, 1H), 6.6 (s, 1H), 4.0 (s, 6H), 3.9 (s, 3H), 1.9 (s, 2H), 1.4 (s, 6H), 1.3 (s, 6H) ppm;  $^{13}\text{C NMR}$  (100 MHz, Chloroform-*d*)  $\delta$  209.5, 166.9, 157.4, 152.7, 148.0, 136.1, 135.0, 110.1, 108.0, 106.8, 95.0, 60.9, 56.7, 56.4, 50.0, 41.3, 33.8, 32.6 (2C), 29.0 (2C) ppm; IR  $\nu_{\text{max}}$  2958, 1733, 1618, 1585, 1346, 1238, 1146, 1113, 1033, 872  $\text{cm}^{-1}$ ; HRMS–EI ( $m/z$ ):  $[\text{M}]^+$  calculated for  $\text{C}_{21}\text{H}_{26}\text{O}_5$ , 358.1780, found, 358.1782.

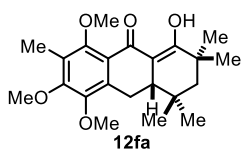

Compound **12fa** (95 mg, 70% yield for two steps) was prepared according to general procedure A from **7a** (61 mg, 0.4 mmol, 1.0 equiv.) and aldehyde **6f** (134 mg, 0.6 mmol, 1.5 equiv.). The PEDA reaction time was 60 minutes under  $\lambda_{\text{max}} = 366$  nm UV light using

anhydrous 1, 4-dioxane as solvent.  $R_f = 0.24$  (20% ethyl acetate – petroleum ether); Light yellow viscous oil;  $^1\text{H NMR}$  (400 MHz, Chloroform-*d*)  $\delta$  17.19 (s, 1H), 3.89 (s, 3H), 3.78 (s, 3H), 3.76 (s, 3H), 3.10 (dd,  $J = 14.8$ , 4.1 Hz, 1H), 2.39 (dd,  $J = 14.3$ , 4.0 Hz, 1H), 2.17 (s, 3H), 2.11 (t,  $J = 14.6$  Hz, 1H), 1.54 (s, 2H), 1.32 (s, 3H), 1.18 (s, 3H), 1.05 (s, 3H), 1.00 (s, 3H) ppm;  $^{13}\text{C NMR}$  (100 MHz, Chloroform-*d*)  $\delta$  191.2, 185.5, 155.50, 155.45, 145.4, 134.3, 124.9, 120.9, 106.0, 61.5, 60.6, 60.2, 52.5, 43.1, 37.0, 31.9, 31.5, 29.7, 27.6, 22.8, 22.1, 9.0 ppm; IR  $\nu_{\text{max}}$  1761, 1616, 1580, 1375, 1321, 1286, 1242, 1207, 1128, 1047  $\text{cm}^{-1}$ ; HRMS–EI ( $m/z$ ):  $[\text{M}]^+$  calculated for  $\text{C}_{22}\text{H}_{30}\text{O}_5$ , 340.2093, found, 340.2097.

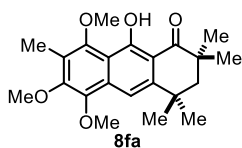

Compound **8fa** (57mg, 60% yield) was prepared according to general procedure B from the above obtained compound **12fa**.  $R_f = 0.26$  (20% ethyl acetate – petroleum ether); Yellow viscous oil;  $^1\text{H NMR}$  (400 MHz, Chloroform-*d*)  $\delta$  15.42 (s, 1H), 7.42 (s, 1H),

3.98 (s, 3H), 3.92 (s, 3H), 3.85 (s, 3H), 2.32 (s, 3H), 1.93 (s, 2H), 1.45 (s, 6H), 1.35 (s, 6H) ppm;  $^{13}\text{C NMR}$  (100 MHz, Chloroform-*d*)  $\delta$  210.3, 165.0, 153.6, 152.7, 146.6, 142.7, 133.3, 123.8, 115.3, 108.9, 107.1, 61.6, 60.9, 60.4, 50.0, 41.5, 33.8, 32.7 (2C), 28.9 (2C), 9.3 ppm; IR  $\nu_{\text{max}}$  2995, 1762, 1616, 1448, 1392, 1243, 1201, 1053  $\text{cm}^{-1}$ ; HRMS–EI ( $m/z$ ):  $[\text{M}]^+$  calculated for  $\text{C}_{22}\text{H}_{28}\text{O}_5$ , 338.1937, found, 338.1932.

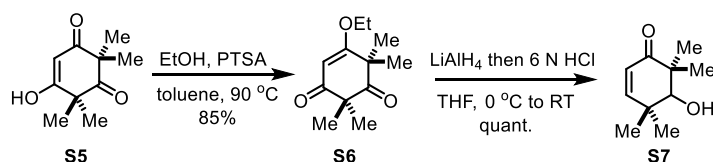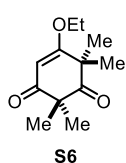

To a stirred solution of **S5** <sup>[2]</sup> (800 mg, 4.40 mmol, 1.0 equiv.) in 30 mL anhydrous toluene was added anhydrous ethanol (12.8 mL, 220 mmol, 50.0 equiv.) and PTSA (152 mg, 0.88 mmol, 0.2 equiv.) under nitrogen atmosphere at room temperature. Then the solution was stirred at 90 °C for

4 hours and cooled to room temperature. The cooled solution was concentrated and purified by silica gel flash

chromatography (20% to 50% ethyl acetate – petroleum ether) to obtain **S6** as yellow viscous oil (767 mg, 85%).  $R_f = 0.60$  (30% ethyl acetate – petroleum ether).

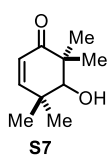

To a stirred solution of above obtained **S6** (767 mg, 3.60 mmol, 1.0 equiv.) in 30 mL anhydrous THF was slowly added  $\text{LiAlH}_4$  (5.4 mL, 10.8 mmol, 3.0 equiv., 2 N in THF) under nitrogen atmosphere at 0 °C. After stirring at 0 °C for 30 minutes, the solution was quenched with saturated  $\text{NH}_4\text{Cl}$  (60 mL) and then added 6 N HCl (60 mL). The mixture was slowly warm to room temperature and stirred for another 1 hour. The mixture was extracted with ethyl acetate (3×50 mL) and the combined organic layer was washed with water, saturated  $\text{NaHCO}_3$ , brine. The combined organic layers were dried over anhydrous sodium sulfate, concentrated, and purified by silica gel flash chromatography (10% to 15% ethyl acetate – petroleum ether) to obtain **S7** as colorless viscous oil (608 mg, quantitative yield).  $R_f = 0.42$  (20% ethyl acetate – petroleum ether). Colorless viscous oil;  $^1\text{H NMR}$  (400 MHz, Chloroform-*d*)  $\delta$  6.58 (d,  $J = 10.2$  Hz, 1H), 5.84 (d,  $J = 10.2$  Hz, 1H), 3.56 (d,  $J = 6.1$  Hz, 1H), 2.02 (br, 1H), 1.21 (s, 3H), 1.20 (s, 3H), 1.18 (s, 3H), 1.10 (s, 3H) ppm;  $^{13}\text{C NMR}$  (100 MHz, Chloroform-*d*)  $\delta$  204.4, 156.3, 124.8, 79.7, 47.7, 38.3, 29.8, 23.2, 21.1, 20.2 ppm; IR  $\nu_{\text{max}}$  3475, 2972, 2873, 1656, 1381, 1362, 1276, 1122, 1060, 831  $\text{cm}^{-1}$ ; HRMS–EI ( $m/z$ ):  $[\text{M}]^+$  calculated for  $\text{C}_{10}\text{H}_{16}\text{O}_2$ , 168.1150, found, 168.1149.

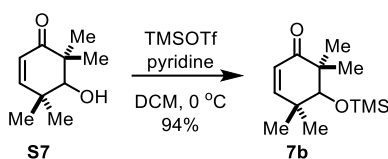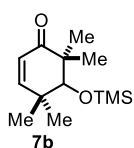

To a stirred solution of **S7** (336 mg, 2.00 mmol, 1.0 equiv.) in 20 mL anhydrous DCM was added pyridine (950 mg, 12.0 mmol, 6.0 equiv.) and TMSOTf (1.34 g, 6.00 mmol, 3.0 equiv.) at 0 °C under nitrogen atmosphere. Then the solution was stirred at room temperature for 30 minutes and quenched with saturated  $\text{NaHCO}_3$ . The solution was extracted with ethyl acetate (3×20 mL). The combined organic layers were dried over anhydrous sodium sulfate, concentrated, and purified by silica gel flash chromatography (5% ethyl acetate – petroleum ether) to obtain **7b** as a colorless viscous oil (452 mg, 94%).  $R_f = 0.65$  (20% ethyl acetate – petroleum ether); Colorless viscous oil;  $^1\text{H NMR}$  (400 MHz, Chloroform-*d*)  $\delta$  6.54 (d,  $J = 10.2$  Hz, 1H), 5.82 (d,  $J = 10.2$  Hz, 1H), 3.57 (s, 1H), 1.13 (s, 3H), 1.12 (s, 3H), 1.11 (s, 3H), 1.05 (s, 3H), 0.16 (s, 9H) ppm;  $^{13}\text{C NMR}$  (100 MHz, Chloroform-*d*)  $\delta$  204.9, 156.5, 124.6, 81.4, 48.3, 38.8, 30.4, 23.7, 21.6, 20.7, 0.7 (3C) ppm; IR  $\nu_{\text{max}}$  2925, 2857, 1626, 1579, 1419, 1375, 1309, 1265, 1203, 1120  $\text{cm}^{-1}$ ; HRMS–EI ( $m/z$ ):  $[\text{M}]^+$  calculated for  $\text{C}_{13}\text{H}_{24}\text{O}_2\text{Si}$ , 240.1546, found, 240.1549.

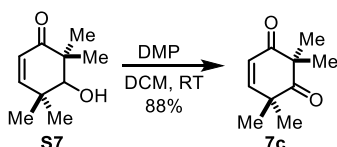



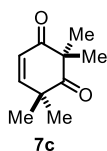

To a stirred solution of **S7** (110 mg, 0.60 mmol, 1.0 equiv.) in 10 mL anhydrous DCM was added DMP (382 mg, 0.90 mmol, 1.5 equiv.) at room temperature. After stirring at room temperature for 30 minutes, the mixture was quenched with saturated  $\text{Na}_2\text{SO}_3/\text{NaHCO}_3$  (5 mL, v/v = 1:1) and extracted with ethyl acetate (3×20 mL). The combined organic layers were washed with water, brine, then dried over anhydrous sodium sulfate, concentrated, and purified by silica gel flash chromatography (5% ethyl acetate – petroleum ether) to obtain **7c** as a colorless viscous oil (88 mg, 88%).  $R_f = 0.40$  (10% ethyl acetate – petroleum ether); Colorless viscous oil;  $^1\text{H NMR}$  (400 MHz, Chloroform-*d*)  $\delta$  6.77 (d,  $J = 10.4$  Hz, 1H), 6.11 (d,  $J = 10.4$  Hz, 1H), 1.32 (s, 6H), 1.31 (s, 6H) ppm;  $^{13}\text{C NMR}$  (100 MHz, Chloroform-*d*)  $\delta$  213.3, 201.4, 153.7, 125.0, 57.7, 44.8, 27.0 (2C), 23.6 (2C) ppm; IR  $\nu_{\text{max}}$  2925, 2857, 1626, 1579, 1419, 1375, 1309, 1265, 1203, 1120  $\text{cm}^{-1}$ ; HRMS–EI ( $m/z$ ):  $[\text{M}]^+$  calculated for  $\text{C}_{10}\text{H}_{14}\text{O}_2$ , 166.0994, found, 166.0996.

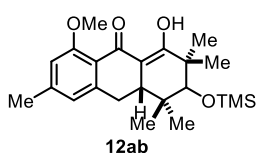

Compound **12ab** (274 mg, 68% yield for two steps) was prepared according to general procedure A from **7b** (240 mg, 1.0 mmol, 1.0 equiv.) and aldehyde **6a** (246 mg, 1.5 mmol, 1.5 equiv.). The PEDA reaction time was 30 minutes under  $\lambda_{\text{max}} = 366$  nm UV light using anhydrous toluene as solvent.  $R_f = 0.28$  (10% ethyl acetate – petroleum ether); White solid, m.p. 156 – 158 °C;  $^1\text{H NMR}$  (500 MHz, Chloroform-*d*)  $\delta$  17.00 (s, 1H), 6.66 (s, 1H), 6.64 (s, 1H), 3.91 (s, 3H), 3.33 (s, 1H), 2.84 (dd,  $J = 13.0, 5.8$  Hz, 1H), 2.60 – 2.46 (m, 2H), 2.35 (s, 3H), 1.33 (s, 3H), 1.18 (s, 3H), 1.06 (s, 3H), 0.96 (s, 3H), 0.10 (s, 9H) ppm;  $^{13}\text{C NMR}$  (100 MHz, Chloroform-*d*)  $\delta$  187.9, 186.6, 159.7, 144.7, 144.1, 121.1, 118.3, 111.1, 106.3, 85.1, 56.0, 42.7, 37.4, 37.1, 30.3, 27.3, 27.1, 27.0, 22.5, 22.0, 0.9 (3C) ppm; IR  $\nu_{\text{max}}$  2956, 2916, 1703, 1606, 1483, 1319, 1068, 1012  $\text{cm}^{-1}$ ; HRMS–EI ( $m/z$ ):  $[\text{M}]^+$  calculated for  $\text{C}_{23}\text{H}_{34}\text{O}_4\text{Si}$ , 402.2226, found, 402.2232.

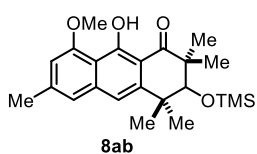

Compound **8ab** (212 mg, 78% yield) was prepared according to general procedure B from the above obtained compound **12ab**.  $R_f = 0.42$  (10% ethyl acetate – petroleum ether); Yellow solid, m.p. 146 – 148 °C;  $^1\text{H NMR}$  (500 MHz, Chloroform-*d*)  $\delta$  15.63 (s, 1H), 7.08 (s, 1H), 7.06 (s, 1H), 6.63 (s, 1H), 4.00 (s, 3H), 3.74 (s, 1H), 2.45 (s, 3H), 1.44 (s, 3H), 1.31 (s, 3H), 1.28 (s, 3H), 1.25 (s, 3H), 0.21 (s, 9H) ppm;  $^{13}\text{C NMR}$  (125 MHz, Chloroform-*d*)  $\delta$  209.8, 167.1, 160.5, 146.9, 142.6, 141.5, 120.7, 115.2, 113.9, 109.5, 108.7, 81.7, 57.1, 48.9, 41.0, 29.6, 28.2, 27.4, 23.2, 22.7, 1.8 (3C) ppm; IR  $\nu_{\text{max}}$  2957, 1706, 1624, 1578, 1385, 1367, 1315, 1120, 1097. 1051  $\text{cm}^{-1}$ ; HRMS–EI ( $m/z$ ):  $[\text{M}]^+$  calculated for  $\text{C}_{23}\text{H}_{32}\text{O}_4\text{Si}$ , 400.2070, found, 400.2073.

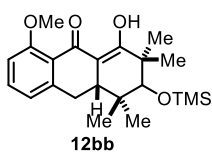

Compound **12bb** (85 mg, 73% yield for two steps) was prepared according to general procedure A from **7b** (72 mg, 0.3 mmol, 1.0 equiv.) and aldehyde **6b** (68 mg, 0.45 mmol, 1.5 equiv.). The PEDA reaction time was 45 minutes under  $\lambda_{\text{max}} = 366$  nm UV light using

anhydrous 1, 4-dioxane as solvent.  $R_f = 0.28$  (5% ethyl acetate – petroleum ether); White solid, m.p. 191 – 193 °C;  $^1\text{H NMR}$  (400 MHz, Chloroform-*d*)  $\delta$  16.97 (s, 1H), 7.33 (t,  $J = 8.0$  Hz, 1H), 6.85 (d,  $J = 8.4$  Hz, 1H), 6.80 (d,  $J = 7.5$  Hz, 1H), 3.91 (s, 3H), 3.34 (s, 1H), 2.86 (t,  $J = 9.4$  Hz, 1H), 2.57 (d,  $J = 8.6$  Hz, 2H), 1.33 (s, 3H), 1.18 (s, 3H), 1.06 (s, 3H), 0.96 (s, 3H), 0.10 (s, 9H) ppm;  $^{13}\text{C NMR}$  (100 MHz, Chloroform-*d*)  $\delta$  188.9, 186.2, 159.6, 144.7, 133.1, 120.7, 120.2, 110.4, 106.5, 85.0, 56.0, 42.8, 37.2, 37.1, 30.2, 27.2, 27.1, 27.0, 22.4, 0.8 (3C) ppm; IR  $\nu_{\text{max}}$  2953, 1702, 1595, 1388, 1348, 1151, 1082, 875  $\text{cm}^{-1}$ ; HRMS–EI ( $m/z$ ):  $[\text{M}]^+$  calculated for  $\text{C}_{22}\text{H}_{32}\text{O}_4\text{Si}$ , 388.2070, found, 388.2075.

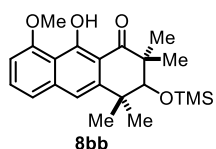

Compound **8bb** (66 mg, 78% yield) was prepared according to general procedure B from the above obtained compound **12bb**.  $R_f = 0.34$  (5% ethyl acetate – petroleum ether); Yellow viscous oil;  $^1\text{H NMR}$  (400 MHz, Chloroform-*d*)  $\delta$  15.58 (s, 1H), 7.48 (t,  $J = 8.0$  Hz, 1H), 7.26 (d,  $J = 8.0$  Hz, 1H), 7.17 (s, 1H), 6.80 (d,  $J = 8.3$  Hz, 1H), 4.02 (s, 3H), 3.75 (s, 1H), 1.46 (s, 3H), 1.32 (s, 3H), 1.29 (s, 3H), 1.27 (s, 3H), 0.22 (s, 9H) ppm;  $^{13}\text{C NMR}$  (100 MHz, Chloroform-*d*)  $\delta$  209.1, 166.1, 159.7, 145.8, 140.3, 130.8, 120.2, 114.9, 114.7, 109.0, 105.7, 80.7, 56.2, 48.0, 40.0, 28.6, 27.3, 26.4, 21.7, 0.8 (3C) ppm; IR  $\nu_{\text{max}}$  2956, 1700, 1622, 1575, 1493, 1352, 1266, 1105, 1010, 895  $\text{cm}^{-1}$ ; HRMS–EI ( $m/z$ ):  $[\text{M}]^+$  calculated for  $\text{C}_{22}\text{H}_{30}\text{O}_4\text{Si}$ , 386.1913, found, 386.1917.

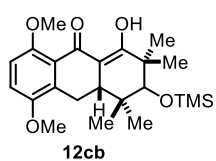

Compound **12cb** (28 mg, 38% yield for two steps) was prepared according to general procedure A from **7b** (42 mg, 0.175 mmol, 1.0 equiv.) and aldehyde **6c** (47 mg, 0.26 mmol, 1.5 equiv.). The PEDA reaction time was 30 minutes under  $\lambda_{\text{max}} = 366$  nm UV light using anhydrous toluene as solvent.  $R_f = 0.2$  (10% ethyl acetate – petroleum ether); White solid, m.p. 190 – 192 °C;  $^1\text{H NMR}$  (400 MHz, Chloroform-*d*)  $\delta$  16.91 (s, 1H), 6.96 (d,  $J = 9.1$  Hz, 1H), 6.80 (d,  $J = 9.1$  Hz, 1H), 3.88 (s, 3H), 3.82 (s, 3H), 3.35 (s, 1H), 3.09 (dd,  $J = 15.2, 4.3$  Hz, 1H), 2.77 (dd,  $J = 14.7, 4.3$  Hz, 1H), 2.12 (t,  $J = 15.0$  Hz, 1H), 1.33 (s, 3H), 1.18 (s, 3H), 1.09 (s, 3H), 0.98 (s, 3H), 0.11 (s, 9H) ppm;  $^{13}\text{C NMR}$  (100 MHz, Chloroform-*d*)  $\delta$  190.5, 186.8, 154.7, 150.7, 133.9, 122.9, 116.2, 111.3, 107.5, 86.2, 57.5, 57.2, 43.9, 38.3, 37.8, 28.2, 28.14, 28.10, 23.6, 22.9, 1.9 (3C) ppm; IR  $\nu_{\text{max}}$  2918, 2849, 1703, 1568, 1483, 1266, 1013, 897, 871, 841  $\text{cm}^{-1}$ ; HRMS–EI ( $m/z$ ):  $[\text{M}]^+$  calculated for  $\text{C}_{23}\text{H}_{34}\text{O}_5\text{Si}$ , 418.2176, found, 418.2184.

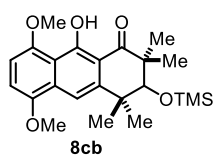

Compound **8cb** (26 mg, 94% yield) was prepared according to general procedure B from the above obtained compound **12cb**.  $R_f = 0.38$  (10% ethyl acetate – petroleum ether); Yellow solid, m.p. 127 – 129 °C;  $^1\text{H NMR}$  (400 MHz, Chloroform-*d*)  $\delta$  15.34 (s, 1H), 7.68 (s, 1H), 6.88 (d,  $J = 8.6$  Hz, 1H), 6.73 (d,  $J = 8.6$  Hz, 1H), 3.97 (s, 3H), 3.95 (s, 3H), 3.75 (s, 1H), 1.48 (s, 3H), 1.31 (s, 3H), 1.29 (s, 3H), 1.28 (s, 3H), 0.21 (s, 9H) ppm;  $^{13}\text{C NMR}$  (100 MHz, Chloroform-*d*)  $\delta$  210.6, 166.2, 154.3, 149.8, 146.5, 132.2, 116.7, 110.7, 109.8, 109.6, 106.7, 81.9, 57.8, 56.9, 49.2, 41.4, 29.9, 28.2, 27.5,

22.7, 1.8 (3C) ppm; IR  $\nu_{\max}$  3003, 2954, 2833, 1701, 1622, 1585, 1493, 1383, 1107, 893  $\text{cm}^{-1}$ ; HRMS–EI ( $m/z$ ):  $[\text{M}]^+$  calculated for  $\text{C}_{23}\text{H}_{32}\text{O}_5\text{Si}$ , 416.2019, found, 416.2022.

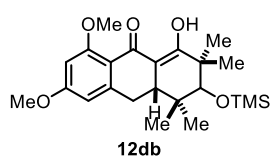

Compound **12db** (77 mg, 61% yield for two steps) was prepared according to general procedure A from **7b** (72 mg, 0.3 mmol, 1.0 equiv.) and aldehyde **6d** (81 mg, 0.45 mmol, 1.5 equiv.). The PEDA reaction time was 45 minutes under  $\lambda_{\max} = 366$  nm UV

light using anhydrous 1, 4-dioxane as solvent.  $R_f = 0.19$  (5% ethyl acetate – petroleum ether); White solid, m.p. 190 – 192 °C;  $^1\text{H}$  NMR (400 MHz, Chloroform-*d*)  $\delta$  17.00 (s, 1H), 6.36 (d,  $J = 2.2$  Hz, 1H), 6.34 (d,  $J = 2.0$  Hz, 1H), 3.89 (s, 3H), 3.84 (s, 3H), 3.32 (s, 1H), 2.83 (dd,  $J = 13.4, 5.3$  Hz, 1H), 2.64 – 2.48 (m, 2H), 1.32 (s, 3H), 1.17 (s, 3H), 1.06 (s, 3H), 0.96 (s, 3H), 0.10 (s, 9H) ppm;  $^{13}\text{C}$  NMR (100 MHz, Chloroform-*d*)  $\delta$  186.9, 186.3, 163.5, 161.6, 146.9, 114.6, 105.7, 104.7, 97.4, 85.1, 56.0, 55.4, 42.4, 37.3, 37.1, 31.0, 27.3, 27.1, 27.0, 22.5, 0.9 (3C) ppm; IR  $\nu_{\max}$  2957, 2873, 1690, 1599, 1458, 1325, 1282, 1264, 1251, 1205, 1159, 1089  $\text{cm}^{-1}$ ; HRMS–EI ( $m/z$ ):  $[\text{M}]^+$  calculated for  $\text{C}_{23}\text{H}_{34}\text{O}_5\text{Si}$ , 418.2176, found, 418.2180.

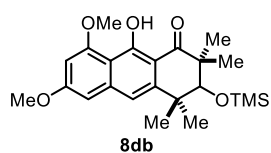

Compound **8db** (73 mg, 96% yield) was prepared according to general procedure B from the above obtained compound **12db**.  $R_f = 0.36$  (5% ethyl acetate – petroleum ether); Yellow viscous oil;  $^1\text{H}$  NMR (400 MHz, Chloroform-*d*)  $\delta$  15.70 (s, 1H), 7.05

(s, 1H), 6.61 (d,  $J = 2.2$  Hz, 1H), 6.43 (d,  $J = 2.2$  Hz, 1H), 3.98 (s, 3H), 3.91 (s, 3H), 3.73 (s, 1H), 1.44 (s, 3H), 1.31 (s, 3H), 1.27 (s, 3H), 1.26 (s, 3H), 0.21 (s, 9H) ppm;  $^{13}\text{C}$  NMR (100 MHz, Chloroform-*d*)  $\delta$  208.3, 166.3, 162.0, 161.1, 146.7, 141.9, 114.0, 110.2, 107.8, 99.2, 98.0, 80.8, 56.2, 55.4, 47.8, 40.0, 28.6, 27.2, 26.3, 21.7, 0.8 (3C) ppm; IR  $\nu_{\max}$  3005, 2988, 1691, 1620, 1585, 1383, 1315, 1159, 1119, 1087, 1066, 895  $\text{cm}^{-1}$ ; HRMS–EI ( $m/z$ ):  $[\text{M}]^+$  calculated for  $\text{C}_{23}\text{H}_{32}\text{O}_5\text{Si}$ , 416.2019, found, 416.2024.

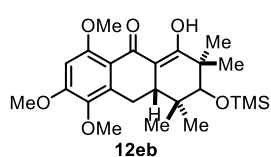

Compound **12eb** (86 mg, 64% yield for two steps) was prepared according to general procedure A from **7b** (72 mg, 0.3 mmol, 1.0 equiv.) and aldehyde **6e** (95 mg, 0.45 mmol, 1.5 equiv.). The PEDA reaction time was 45 minutes under  $\lambda_{\max} = 366$  nm UV

light using anhydrous 1, 4-dioxane as solvent.  $R_f = 0.26$  (20% ethyl acetate – petroleum ether); White solid, m.p. 206 – 208 °C;  $^1\text{H}$  NMR (400 MHz, Chloroform-*d*)  $\delta$  16.97 (s, 1H), 6.40 (s, 1H), 3.92 (s, 3H), 3.91 (s, 3H), 3.72 (s, 3H), 3.33 (s, 1H), 3.07 (dd,  $J = 14.8, 4.0$  Hz, 1H), 2.71 (dd,  $J = 14.6, 4.0$  Hz, 1H), 2.15 (t,  $J = 14.7$  Hz, 1H), 1.32 (s, 3H), 1.17 (s, 3H), 1.08 (s, 3H), 0.98 (s, 3H), 0.09 (s, 9H) ppm;  $^{13}\text{C}$  NMR (100 MHz, Chloroform-*d*)  $\delta$  186.1, 185.7, 156.7, 155.8, 138.0, 137.0, 113.1, 104.9, 94.3, 84.3, 60.0, 55.6, 54.9, 41.7, 36.4, 36.2, 26.4, 26.2, 26.1, 21.69, 21.66, 0.0 (3C) ppm; IR  $\nu_{\max}$  2916, 2849, 1738, 1691, 1645, 1591, 1556, 1329, 1286, 1236, 1089, 1070  $\text{cm}^{-1}$ ; HRMS–EI ( $m/z$ ):  $[\text{M}]^+$  calculated for  $\text{C}_{24}\text{H}_{36}\text{O}_6\text{Si}$ , 448.2281, found, 448.2279.

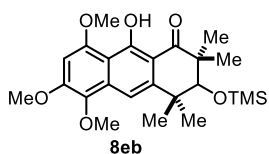

Compound **8eb** (77 mg, 90% yield) was prepared according to general procedure B from the above obtained compound **12eb**.  $R_f = 0.48$  (20% ethyl acetate – petroleum ether); Yellow viscous oil;  $^1\text{H NMR}$  (400 MHz, Chloroform-*d*)  $\delta$  15.83 (s, 1H), 7.45 (s, 1H), 6.56 (s, 1H), 4.01 (s, 3H), 4.00 (s, 3H), 3.87 (s, 3H), 3.74 (s, 1H), 1.47 (s, 3H), 1.31 (s, 3H), 1.28 (s, 3H), 1.26 (s, 3H), 0.21 (s, 9H) ppm;  $^{13}\text{C NMR}$  (100 MHz, Chloroform-*d*)  $\delta$  208.4, 166.8, 157.4, 152.8, 146.2, 136.1, 134.7, 109.9, 107.6, 107.4, 95.1, 80.8, 60.9, 56.6, 56.4, 47.7, 40.3, 28.6, 27.3, 26.4, 21.7, 0.8 (3C) ppm; IR  $\nu_{\text{max}}$  2988, 2847, 1691, 1618, 1593, 1425, 1387, 1315, 1213, 1115, 1066, 1032  $\text{cm}^{-1}$ ; HRMS–EI ( $m/z$ ):  $[\text{M}]^+$  calculated for  $\text{C}_{24}\text{H}_{34}\text{O}_6\text{Si}$ , 446.2125, found, 446.2129.

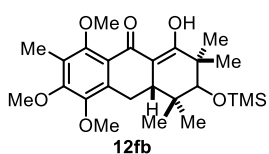

Compound **12fb** (99 mg, 71% yield for two steps) was prepared according to general procedure A from **7b** (72mg, 0.3 mmol, 1.0 equiv.) and aldehyde **6f** (100 mg, 0.45 mmol, 1.5 equiv.). The PEDA reaction time was 45 minutes under  $\lambda_{\text{max}} = 366$  nm UV light using anhydrous 1, 4-dioxane as solvent.  $R_f = 0.56$  (5% ethyl acetate – petroleum ether); White solid, m.p. 136 – 138 °C;  $^1\text{H NMR}$  (400 MHz, Chloroform-*d*)  $\delta$  17.10 (s, 1H), 3.89 (s, 3H), 3.79 (s, 3H), 3.77 (s, 3H), 3.36 (s, 1H), 3.02 (dd,  $J = 14.8, 4.3$  Hz, 1H), 2.77 (dd,  $J = 14.7, 4.3$  Hz, 1H), 2.17 (s, 3H), 2.16 (t,  $J = 14.6$  Hz, 1H), 1.33 (s, 3H), 1.18 (s, 3H), 1.09 (s, 3H), 0.97 (s, 3H), 0.11 (s, 9H) ppm;  $^{13}\text{C NMR}$  (100 MHz, Chloroform-*d*)  $\delta$  189.8, 183.5, 154.7, 154.5, 144.6, 133.7, 124.1, 120.1, 105.2, 84.2, 60.7, 59.7, 59.4, 42.2, 36.4, 36.0, 26.4, 26.3, 26.2, 21.6, 21.3, 8.1, 0.0 (3C) ppm; IR  $\nu_{\text{max}}$  1691, 1645, 1587, 1556, 1388, 1329, 1207, 1116, 1084, 902  $\text{cm}^{-1}$ ; HRMS–EI ( $m/z$ ):  $[\text{M}]^+$  calculated for  $\text{C}_{25}\text{H}_{38}\text{O}_6\text{Si}$ , 462.2438, found, 462.2443.

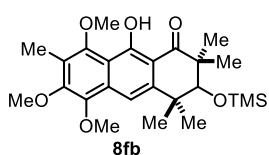

Compound **8fb** (35.5 mg, 36% yield) was prepared according to general procedure B from the above obtained compound **12fb**.  $R_f = 0.62$  (5% ethyl acetate – petroleum ether); Yellow viscous oil;  $^1\text{H NMR}$  (400 MHz, Chloroform-*d*)  $\delta$  15.44 (s, 1H), 7.51 (s, 1H), 3.99 (s, 3H), 3.93 (s, 3H), 3.85 (s, 3H), 3.76 (s, 1H), 2.32 (s, 3H), 1.49 (s, 3H), 1.33 (s, 3H), 1.30 (s, 3H), 1.28 (s, 3H), 0.22 (s, 9H) ppm;  $^{13}\text{C NMR}$  (100 MHz, Chloroform-*d*)  $\delta$  208.5, 164.0, 152.8, 151.9, 144.1, 141.9, 132.2, 123.2, 114.4, 107.7, 107.0, 80.0, 60.8, 60.1, 59.6, 47.2, 39.4, 28.0, 26.4, 25.7, 20.9, 8.5, 0.0 (3C) ppm; IR  $\nu_{\text{max}}$  2988, 1733, 1692, 1614, 1568, 1390, 1118, 1089, 1055, 1003  $\text{cm}^{-1}$ ; HRMS–EI ( $m/z$ ):  $[\text{M}]^+$  calculated for  $\text{C}_{25}\text{H}_{36}\text{O}_6\text{Si}$ , 460.2281, found, 460.2285.

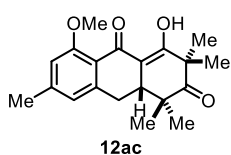

Compound **12ac** (12 mg, 20% yield for two steps) was prepared according to general procedure A from **7c** (30 mg, 0.18 mmol, 1.0 equiv.) and aldehyde **6a** (45 mg, 0.27 mmol, 1.5 equiv.). The PEDA reaction time was 45 minutes under  $\lambda_{\text{max}} = 366$  nm UV light using anhydrous toluene as solvent.  $R_f = 0.3$  (10% ethyl acetate – petroleum ether); Light yellow solid, m.p. 185 – 187 °C;  $^1\text{H NMR}$  (400 MHz, Chloroform-*d*)  $\delta$  16.83 (s, 1H), 6.70 (s, 1H), 6.67 (s, 1H), 3.93 (s, 3H), 2.85 –

2.64 (m, 3H), 2.37 (s, 3H), 1.42 (s, 3H), 1.28 (s, 3H), 1.23 (s, 3H), 1.09 (s, 3H) ppm;  $^{13}\text{C}$  NMR (100 MHz, Chloroform-*d*)  $\delta$  216.1, 189.9, 184.8, 160.9, 146.0, 143.4, 122.5, 118.1, 112.6, 105.7, 57.1, 50.9, 47.4, 39.2, 30.7, 26.7, 24.3, 23.0, 22.3, 20.9 ppm; IR  $\nu_{\text{max}}$  3014, 1707, 1608, 1421, 1313, 1267, 1205, 1097  $\text{cm}^{-1}$ ; HRMS–EI ( $m/z$ ):  $[\text{M}]^+$  calculated for  $\text{C}_{20}\text{H}_{24}\text{O}_4$ , 328.1675, found, 328.1679.

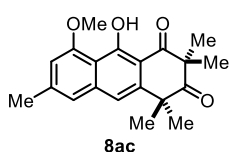

Compound **8ac** (9 mg, 75% yield) was prepared according to general procedure B from the above obtained compound **12ac**.  $R_f = 0.4$  (10% ethyl acetate – petroleum ether); Yellow solid, m.p. 146 – 148 °C;  $^1\text{H}$  NMR (500 MHz, Chloroform-*d*)  $\delta$  14.56 (s, 1H), 7.10

(s, 2H), 6.69 (s, 1H), 4.03 (s, 3H), 2.48 (s, 3H), 1.55 (s, 6H), 1.44 (s, 6H) ppm;  $^{13}\text{C}$  NMR (125 MHz, Chloroform-*d*)  $\delta$  213.3, 205.9, 165.9, 160.5, 143.2, 142.9, 141.3, 121.0, 115.4, 114.0, 109.34, 109.28, 57.2, 56.0, 49.1, 29.3 (2C), 25.5 (2C), 23.2 ppm; IR  $\nu_{\text{max}}$  3053, 2943, 1709, 1624, 1578, 1385, 1367, 1333, 1161, 1118  $\text{cm}^{-1}$ ; HRMS–EI ( $m/z$ ):  $[\text{M}]^+$  calculated for  $\text{C}_{20}\text{H}_{22}\text{O}_4$ , 326.1518, found, 326.1516.

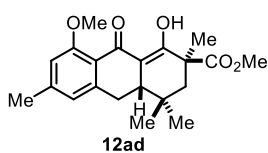

Compound **12ad** (57 mg, 80% yield for two steps) was prepared according to general procedure A from **7d** (40 mg, 0.2 mmol, 1.0 equiv.) and aldehyde **6a** (49 mg, 0.3 mmol, 1.5 equiv.). The PEDA reaction time was 45 minutes under  $\lambda_{\text{max}} = 366$  nm UV light

using anhydrous 1, 4-dioxane as solvent.  $R_f = 0.40$  (20% ethyl acetate – petroleum ether); White solid, m.p. 160 – 162 °C;  $^1\text{H}$  NMR (400 MHz, Chloroform-*d*)  $\delta$  16.76 (s, 1H), 6.68 (s, 1H), 6.64 (s, 1H), 3.92 (s, 3H), 3.66 (s, 3H), 2.70 – 2.46 (m, 3H), 2.36 (s, 3H), 2.03 (d,  $J = 13.8$  Hz, 1H), 1.64 (d,  $J = 13.8$  Hz, 1H), 1.60 (s, 3H), 1.06 (s, 3H), 1.01 (s, 3H) ppm;  $^{13}\text{C}$  NMR (100 MHz, Chloroform-*d*)  $\delta$  187.8, 181.0, 175.2, 160.1, 144.9, 144.4, 121.1, 117.9, 111.3, 107.4, 56.1, 52.6, 49.0, 48.1, 42.9, 31.9, 30.8, 29.5, 22.9, 22.7, 22.0 ppm; IR  $\nu_{\text{max}}$  3057, 2957, 1738, 1607, 1479, 1460, 1265, 1230, 1155, 1097, 876, 835  $\text{cm}^{-1}$ ; HRMS–EI ( $m/z$ ):  $[\text{M}]^+$  calculated for  $\text{C}_{21}\text{H}_{26}\text{O}_5$ , 358.1780, found, 358.1784.

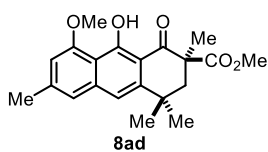

Compound **8ad** (48.4 mg, 85% yield) was prepared according to general procedure B from the above obtained compound **12ad**.  $R_f = 0.6$  (20% ethyl acetate – petroleum ether); Yellow solid, m.p. 181 – 183 °C;  $^1\text{H}$  NMR (400 MHz, Chloroform-*d*)  $\delta$  15.69

(s, 1H), 7.04 (s, 1H), 6.98 (s, 1H), 6.64 (s, 1H), 4.02 (s, 3H), 3.65 (s, 3H), 2.49 (d,  $J = 14.2$  Hz, 1H), 2.46 (s, 3H), 2.04 (d,  $J = 14.1$  Hz, 1H), 1.59 (s, 3H), 1.44 (s, 3H), 1.24 (s, 3H) ppm;  $^{13}\text{C}$  NMR (125 MHz, Chloroform-*d*)  $\delta$  201.6, 174.7, 167.1, 159.7, 146.6, 142.0, 140.8, 119.7, 113.8, 113.0, 109.7, 107.8, 56.2, 52.7, 52.0, 47.9, 33.5, 31.6, 30.5, 24.7, 22.2 ppm; IR  $\nu_{\text{max}}$  2988, 1734, 1626, 1578, 1267, 1227, 1151, 897  $\text{cm}^{-1}$ ; HRMS–EI ( $m/z$ ):  $[\text{M}]^+$  calculated for  $\text{C}_{21}\text{H}_{24}\text{O}_5$ , 356.1624, found, 356.1622.

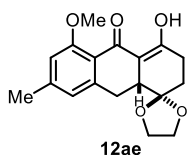

Compound **12ae** (20 mg, 32% yield for two steps) was prepared according to general procedure A from **7e** (31 mg, 0.2 mmol, 1.0 equiv.) and aldehyde **6a** (49 mg, 0.3 mmol, 1.5 equiv.). The PEDA reaction time was 60 minutes under  $\lambda_{\max} = 366$  nm UV light using anhydrous 1, 4-dioxane as solvent.  $R_f = 0.26$  (20% ethyl acetate – petroleum ether); Yellow solid, m.p. 177 – 180 °C;  $^1\text{H NMR}$  (400 MHz, Chloroform-*d*)  $\delta$  16.55 (s, 1H), 6.66 (s, 1H), 6.65 (s, 1H), 4.14 – 3.98 (m, 4H), 3.91 (s, 3H), 3.00 (ddd,  $J = 11.0, 7.0, 1.6$  Hz, 1H), 2.80 – 2.64 (m, 3H), 2.48 (ddd,  $J = 18.6, 6.0, 1.5$  Hz, 1H), 2.35 (s, 3H), 1.94 (ddd,  $J = 13.2, 6.5, 1.6$  Hz, 1H), 1.81 (td,  $J = 13.0, 6.1$  Hz, 1H) ppm;  $^{13}\text{C NMR}$  (100 MHz, Chloroform-*d*)  $\delta$  187.0, 180.9, 160.2, 144.8, 144.3, 121.5, 117.9, 111.2, 107.9, 106.3, 65.6, 64.9, 56.0, 40.6, 29.9, 29.8, 29.0, 22.0 ppm; IR  $\nu_{\max}$  3055, 2883, 1718, 1606, 1414, 1337, 1277, 1267, 1147, 1089, 1049, 926  $\text{cm}^{-1}$ ; HRMS–EI ( $m/z$ ):  $[\text{M}]^+$  calculated for  $\text{C}_{18}\text{H}_{20}\text{O}_5$ , 316.1311, found, 316.1308.

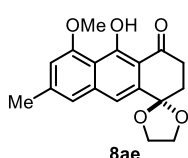

Compound **8ae** (20 mg, quantitative yield) was prepared according to general procedure B from the above obtained compound **12ae**.  $R_f = 0.32$  (20% ethyl acetate – petroleum ether); Yellow solid, m.p. 185 – 189 °C;  $^1\text{H NMR}$  (400 MHz, Chloroform-*d*)  $\delta$  15.26 (s, 1H), 7.20 (s, 1H), 7.12 (s, 1H), 6.70 (s, 1H), 4.24 – 4.10 (m, 4H), 4.01 (s, 3H), 2.96 (t,  $J = 6.6$  Hz, 2H), 2.47 (s, 3H), 2.30 (t,  $J = 6.6$  Hz, 2H) ppm;  $^{13}\text{C NMR}$  (100 MHz, Chloroform-*d*)  $\delta$  202.9, 166.0, 159.6, 142.0, 140.1, 137.4, 120.6, 114.3, 113.5, 110.0, 108.7, 105.7, 65.2 (2C), 56.2, 35.5, 32.8, 22.2 ppm; IR  $\nu_{\max}$  2914, 2849, 1722, 1610, 1579, 1275, 1267, 1116, 1090, 1026  $\text{cm}^{-1}$ ; HRMS–EI ( $m/z$ ):  $[\text{M}]^+$  calculated for  $\text{C}_{18}\text{H}_{18}\text{O}_5$ , 314.1154, found, 314.1150.

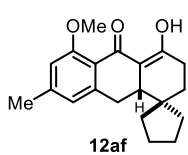

Compound **12af** (24.4 mg, 30% yield for two steps) was prepared according to general procedure A from **7f** (40 mg, 0.26 mmol, 1.0 equiv.) and aldehyde **6a** (64 mg, 0.39 mmol, 1.5 equiv.). The PEDA reaction time was 60 minutes under  $\lambda_{\max} = 366$  nm UV light using anhydrous 1, 4-dioxane as solvent.  $R_f = 0.38$  (10% ethyl acetate – petroleum ether); Yellow solid, m.p. 167 – 169 °C;  $^1\text{H NMR}$  (400 MHz, Chloroform-*d*)  $\delta$  16.63 (s, 1H), 6.66 (s, 1H), 6.64 (s, 1H), 3.91 (s, 3H), 2.67 (d,  $J = 11.2$  Hz, 1H), 2.62 – 2.50 (m, 2H), 2.47 (dd,  $J = 12.4, 6.3$  Hz, 1H), 2.38 – 2.29 (m,  $\text{CH}_3 + 1/2 \text{CH}_2$ , 4H), 1.79 – 1.63 (m, 5H), 1.62 – 1.49 (m, 3H), 1.43 – 1.35 (m, 1H), 1.34 – 1.23 (m, 1H) ppm;  $^{13}\text{C NMR}$  (100 MHz, Chloroform-*d*)  $\delta$  187.9, 181.9, 160.0, 144.9, 144.5, 121.2, 118.1, 111.2, 108.8, 56.0, 43.3, 41.6, 38.0, 34.1, 31.4, 30.3, 28.7, 26.8, 25.0, 22.0 ppm; IR  $\nu_{\max}$  2916, 2848, 1720, 1608, 1541, 1421, 1339, 1265  $\text{cm}^{-1}$ ; HRMS–EI ( $m/z$ ):  $[\text{M}]^+$  calculated for  $\text{C}_{20}\text{H}_{24}\text{O}_3$ , 312.1725, found, 312.1722.

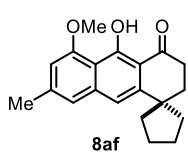

Compound **8af** (24.2 mg, quantitative yield) was prepared according to general procedure B from the above obtained compound **12af**.  $R_f = 0.54$  (10% ethyl acetate – petroleum ether); Yellow solid, m.p. 136 – 138 °C;  $^1\text{H NMR}$  (400 MHz, Chloroform-*d*)  $\delta$  15.67 (s, 1H), 7.04

(s, 1H), 6.91 (s, 1H), 6.62 (s, 1H), 4.00 (s, 3H), 2.79 (t,  $J = 6.6$  Hz, 2H), 2.45 (s, 3H), 2.02 (t,  $J = 6.6$  Hz, 4H), 1.93 – 1.71 (m, 6H) ppm;  $^{13}\text{C}$  NMR (100 MHz, Chloroform-*d*)  $\delta$  204.3, 166.4, 159.6, 147.3, 141.7, 140.6, 119.8, 113.7, 113.0, 110.6, 107.6, 56.1, 46.0, 39.8 (2C), 35.9, 34.9, 25.0 (2C), 22.2 ppm; IR  $\nu_{\text{max}}$  2951, 2854, 1718, 1625, 1577, 1419, 1267, 1199, 1120, 1003  $\text{cm}^{-1}$ ; HRMS–EI ( $m/z$ ):  $[\text{M}]^+$  calculated for  $\text{C}_{20}\text{H}_{22}\text{O}_3$ , 310.1569, found, 310.1566.

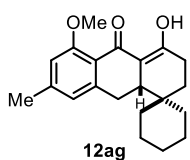

Compound **12ag** (25.4 mg, 26% yield for two steps) was prepared according to general procedure A from **7g** (31 mg, 0.3 mmol, 1.0 equiv.) and aldehyde **6a** (49 mg, 0.45 mmol, 1.5 equiv.). The PEDA reaction time was 60 minutes under  $\lambda_{\text{max}} = 366$  nm UV light using

anhydrous 1, 4-dioxane as solvent.  $R_f = 0.28$  (10% ethyl acetate – petroleum ether); Yellow solid, m.p. 206 – 209 °C;  $^1\text{H}$  NMR (400 MHz, Chloroform-*d*)  $\delta$  6.62 (s, 1H), 6.66 (s, 1H), 6.64 (s, 1H), 3.91 (s, 3H), 2.68 (dd,  $J = 14.1, 3.4$  Hz, 1H), 2.51 (t,  $J = 14.2$  Hz, 1H), 2.35 (s, 3H), 2.35 – 2.28 (m, 2H), 2.27 – 2.20 (m, 1H), 1.76 – 1.65 (m, 2H), 1.64 – 1.53 (m, 5H), 1.45 – 1.28 (m, 1H), 1.27 – 1.09 (m, 4H) ppm;  $^{13}\text{C}$  NMR (100 MHz, Chloroform-*d*)  $\delta$  187.9, 181.6, 160.0, 145.1, 144.5, 121.1, 118.1, 111.2, 107.8, 56.0, 43.6, 35.7, 34.1, 30.7, 27.3, 27.2, 27.1, 26.6, 22.1, 21.6, 21.3 ppm; IR  $\nu_{\text{max}}$  2924, 1708, 1608, 1417, 1309, 1267, 1107, 1092, 897, 816  $\text{cm}^{-1}$ ; HRMS–EI ( $m/z$ ):  $[\text{M}]^+$  calculated for  $\text{C}_{21}\text{H}_{26}\text{O}_3$ , 326.1882, found, 326.1886.

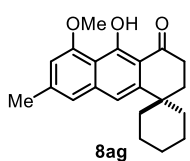

Compound **8ag** (25.2 mg, quantitative yield) was prepared according to general procedure B from the above obtained compound **12ag**.  $R_f = 0.42$  (10% ethyl acetate – petroleum ether); Yellow solid, m.p. 158 – 160 °C;  $^1\text{H}$  NMR (400 MHz, Chloroform-*d*)  $\delta$  15.69 (s, 1H), 7.08

(s, 1H), 7.05 (s, 1H), 6.62 (s, 1H), 4.00 (s, 3H), 2.72 (t,  $J = 6.7$  Hz, 2H), 2.45 (s, 3H), 2.10 (t,  $J = 6.7$  Hz, 2H), 1.84 – 1.73 (m, 5H), 1.72 – 1.64 (m, 2H), 1.64 – 1.51 (m, 2H), 1.39 – 1.27 (m, 1H) ppm;  $^{13}\text{C}$  NMR (100 MHz, Chloroform-*d*)  $\delta$  204.1, 166.5, 159.6, 148.3, 141.6, 140.8, 119.9, 112.89, 112.86, 110.5, 107.7, 56.1, 36.7, 36.4 (2C), 33.6, 27.7, 26.0, 22.2, 22.0 (2C) ppm; IR  $\nu_{\text{max}}$  2925, 2857, 1626, 1579, 1419, 1375, 1309, 1265, 1203, 1120  $\text{cm}^{-1}$ ; HRMS–EI ( $m/z$ ):  $[\text{M}]^+$  calculated for  $\text{C}_{21}\text{H}_{24}\text{O}_3$ , 324.1725, found, 324.1729.

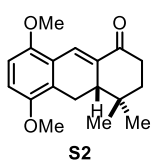

Compound **S2** (71.5 mg, 25% yield for one step) was prepared according to the step 1 of general procedure A from **7h** (248 mg, 2.0 mmol, 2.0 equiv.) and aldehyde **6c** (180 mg, 1.0 mmol, 1.0 equiv.). The PEDA reaction time was 3 hours under  $\lambda_{\text{max}} = 366$  nm UV light using anhydrous

toluene as solvent.  $R_f = 0.30$  (10% ethyl acetate – petroleum ether); Yellow solid, m.p. 153 - 155 °C;  $^1\text{H}$  NMR (400 MHz, Chloroform-*d*)  $\delta$  7.99 (d,  $J = 3.0$  Hz, 1H), 6.82 (d,  $J = 9.0$  Hz, 1H), 6.66 (d,  $J = 8.9$  Hz, 1H), 3.81 (s, 3H), 3.79 (s, 3H), 3.19 (dd,  $J = 15.8, 5.9$  Hz, 1H), 2.61 – 2.43 (m, 3H), 2.23 (t,  $J = 16.4$  Hz, 1H), 1.78 – 1.68 (m, 2H), 1.15 (s, 3H), 0.99 (s, 3H) ppm;  $^{13}\text{C}$  NMR (100 MHz, Chloroform-*d*)  $\delta$  199.1, 152.0, 150.2, 133.8, 130.1, 126.9, 122.6, 113.1, 108.7, 56.0, 55.9, 44.0, 36.7, 35.1, 31.6, 29.2, 22.2, 20.8 ppm; IR  $\nu_{\text{max}}$  2935, 1747,

1670, 1593, 1566, 1483, 1281, 1261, 1101, 1078  $\text{cm}^{-1}$ ; HRMS–EI ( $m/z$ ):  $[\text{M}]^+$  calculated for  $\text{C}_{18}\text{H}_{22}\text{O}_3$ , 286.1569, found, 286.1566.

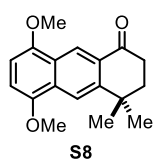

Compound **S8** (51 mg, 72% yield) was prepared according to general procedure B from the above obtained compound **S2**.  $R_f = 0.46$  (10% ethyl acetate – petroleum ether); Yellow solid, m.p. 120 – 122  $^{\circ}\text{C}$ ;  $^1\text{H}$  NMR (400 MHz, Chloroform-*d*)  $\delta$  8.96 (s, 1H), 8.19 (s, 1H), 6.77 (d,  $J = 8.3$  Hz, 1H), 6.64 (d,  $J = 8.3$  Hz, 1H), 3.97 (s, 3H), 3.95 (s, 3H), 2.82 (t,  $J = 3.2$  Hz, 2H), 2.08 (t,  $J = 6.8$  Hz, 2H), 1.49 (s, 6H) ppm;  $^{13}\text{C}$  NMR (100 MHz, Chloroform-*d*)  $\delta$  198.7, 151.2, 148.9, 147.7, 129.3, 129.0, 124.5, 123.5, 118.2, 106.0, 102.9, 55.8, 55.7, 37.1, 35.5, 34.2, 30.1 (2C) ppm; IR  $\nu_{\text{max}}$  2970, 1749, 1683, 1626, 1585, 1462, 1286, 1269, 1120, 1092  $\text{cm}^{-1}$ ; HRMS–EI ( $m/z$ ):  $[\text{M}]^+$  calculated for  $\text{C}_{18}\text{H}_{20}\text{O}_3$ , 284.1412, found, 284.1413.



## Experimental procedures and spectroscopic data of synthesis of the isomer of garveatin C

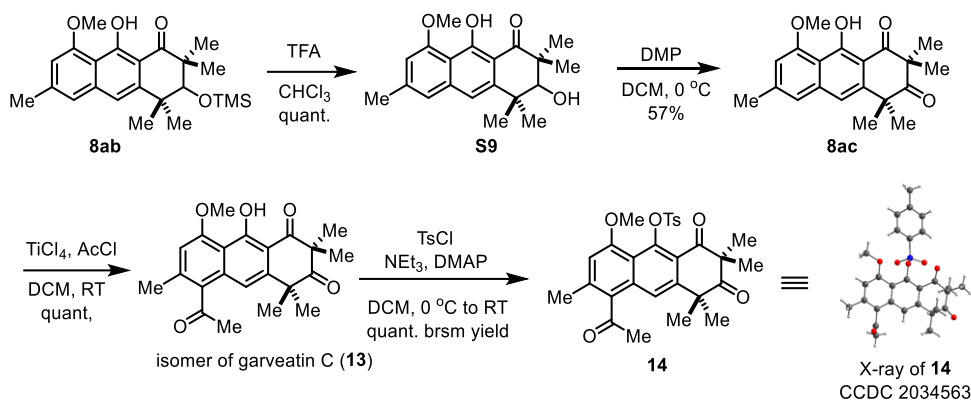

**Table S2.** Screening acetylation conditions of **8ac**

| entry | condition                                                               | result           |
|-------|-------------------------------------------------------------------------|------------------|
| 1     | AlCl <sub>3</sub> , AcCl, DCM, 0 °C to RT to 50 °C                      | trace <b>13</b>  |
| 2     | AlCl <sub>3</sub> , Ac <sub>2</sub> O, DCM, 0 °C to RT to 50 °C         | trace <b>13</b>  |
| 3     | BF <sub>3</sub> ·Et <sub>2</sub> O, AcCl, DCM, RT to 50 °C              | trace <b>13</b>  |
| 4     | BF <sub>3</sub> ·Et <sub>2</sub> O, Ac <sub>2</sub> O, DCM, RT to 50 °C | trace <b>13</b>  |
| 5     | TiCl <sub>4</sub> , AcCl, DCM, 0 °C to RT                               | quant. <b>13</b> |
| 6     | <i>n</i> -BuLi then AcCl, THF, 0 °C to RT                               | N.R.             |

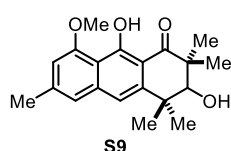

To a stirred solution of compound **8ab** (72 mg, 0.18 mmol, 1.0 equiv.) in 5 mL AR grade chloroform was added TFA (0.50 mL) at room temperature. After stirring at room temperature for 1 hour, the mixture was quenched with saturated NaHCO<sub>3</sub> at 0 °C and extracted with ethyl acetate (3×20 mL). The combined organic layers were dried over anhydrous sodium sulfate, concentrated, and purified by silica gel flash chromatography (15% ethyl acetate – petroleum ether) to obtain the corresponding product **S9** as yellow solid (60 mg, quantitative yield). *R*<sub>f</sub> = 0.18 (10% ethyl acetate – petroleum ether); Yellow solid, m.p. 176 – 178 °C; <sup>1</sup>H NMR (500 MHz, Chloroform-*d*) δ 15.67 (s, 1H), 7.08 (s, 1H), 7.06 (s, 1H), 6.64 (s, 1H), 4.01 (s, 3H), 3.69 (d, *J* = 6.2 Hz, 1H), 2.46 (s, 3H), 1.88 (d, *J* = 6.3 Hz, 1H), 1.52 (s, 3H), 1.39 (s, 3H), 1.34 (s, 3H), 1.33 (s, 3H) ppm; <sup>13</sup>C NMR (125 MHz, Chloroform-*d*) δ 208.1, 166.5, 159.6, 145.4, 141.8, 140.6, 119.7, 114.4, 113.1, 108.4, 107.9, 79.3, 56.2, 47.3, 39.5, 28.9, 26.6, 26.0, 22.2, 21.6 cm<sup>-1</sup>; HRMS–EI (*m/z*): [*M*]<sup>+</sup> calculated for C<sub>20</sub>H<sub>24</sub>O<sub>4</sub>, 328.1675, found, 328.1678.

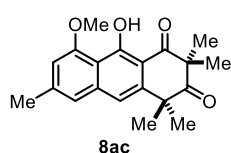

To a stirred solution of compound **S9** (60 mg, 0.18 mmol, 1.0 equiv.) in 10 mL anhydrous DCM was added DMP (60 mg, 0.18 mmol, 1.0 equiv.) at room temperature. After stirring at room temperature for 30 minutes, the mixture was quenched with saturated

Na<sub>2</sub>SO<sub>3</sub>/NaHCO<sub>3</sub> (5 mL, v/v = 1:1) and extracted with ethyl acetate (3 × 20 mL). The combined organic layers were washed with water, brine, then dried over anhydrous sodium sulfate, concentrated, and purified by silica gel flash chromatography (10% ethyl acetate – petroleum ether) to obtain **8ac** as yellow solid (33 mg, 57%).

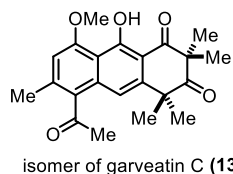

To a stirred solution of compound **8ac** (20 mg, 0.06 mmol, 1.0 equiv.) in 3 mL anhydrous DCM was added acetyl chloride (190 mg, 2.40 mmol, 40.0 equiv.) and titanium tetrachloride (228 mg, 1.20 mmol, 20.0 equiv.) at 0 °C. After stirring at room temperature for 5 hours, the mixture was quenched with saturated NaHCO<sub>3</sub> (5 mL) and extracted with ethyl acetate (3 × 10 mL). The combined organic layers were washed with water, brine, then dried over anhydrous sodium sulfate, concentrated, and purified by silica gel flash chromatography (10% to 20% ethyl acetate – petroleum ether) to obtain compound **13** as yellow viscous oil (23 mg, quantitative yield). *R<sub>f</sub>* = 0.38 (20% ethyl acetate – petroleum ether); Yellow viscous oil; <sup>1</sup>H NMR (400 MHz, Chloroform-*d*) δ 14.52 (s, 1H), 6.92 (s, 1H), 6.68 (s, 1H), 4.04 (s, 3H), 2.59 (s, 3H), 2.41 (s, 3H), 1.52 (s, 6H), 1.44 (s, 6H) ppm; <sup>13</sup>C NMR (100 MHz, Chloroform-*d*) δ 211.7, 207.3, 205.2, 164.8, 159.7, 143.2, 137.3, 135.8, 131.8, 113.3, 110.9, 108.6, 108.5, 56.3, 55.2, 48.3, 33.0, 28.3 (2C), 24.5 (2C), 20.2 ppm; IR *v*<sub>max</sub> 3009, 2949, 1791, 1699, 1618, 1423, 1352, 1153, 1055, 1006 cm<sup>-1</sup>; HRMS–EI (*m/z*): [M]<sup>+</sup> calculated for C<sub>22</sub>H<sub>24</sub>O<sub>5</sub>, 368.1624, found, 368.1629.

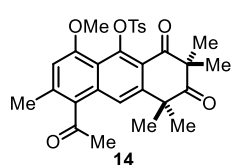

To a stirred solution of compound **13** (23 mg, 0.06 mmol, 1.0 equiv.) in 3 mL anhydrous DCM was added triethylamine (30 mg, 0.30 mmol, 5.0 equiv.), DMAP (3.7 mg, 0.03 mmol, 0.5 equiv.) and TsCl (11.5 mg, 0.12 mmol, 2.0 equiv.) at 0 °C. After stirring at room temperature for 3 hours, the mixture was concentrated and purified by silica gel flash chromatography (20% to 30% ethyl acetate – petroleum ether) to obtain compound **14** as yellow solid (15 mg, 54%) and starting material **13** (10 mg, 46%). *R<sub>f</sub>* = 0.2 (20% ethyl acetate – petroleum ether); Compound **14** was recrystallized from 1,2-dichloroethane/hexane (v/v = 1/4) at room temperature to obtain yellow crystals, CCDC (2034563). m.p. 175–177 °C; <sup>1</sup>H NMR (400 MHz, Chloroform-*d*) δ 7.84 (d, *J* = 8.3 Hz, 2H), 7.53 (s, 1H), 7.35 (d, *J* = 8.0 Hz, 2H), 6.61 (s, 1H), 3.69 (s, 3H), 2.63 (s, 3H), 2.46 (s, 3H), 2.41 (s, 3H), 1.47 (s, 6H), 1.33 (s, 6H) ppm; <sup>13</sup>C NMR (100 MHz, Chloroform-*d*) δ 210.9, 207.0, 198.0, 157.0, 145.0, 142.6, 142.1, 135.5, 134.1, 134.0, 131.1, 129.4 (2C), 128.4 (2C), 124.8, 119.0 117.8, 109.3, 58.2, 55.5, 49.0, 33.2, 27.4 (2C), 22.9 (2C), 21.7 , 20.2 ppm; IR *v*<sub>max</sub> 2954, 2916, 1697, 1614, 1421, 1352, 1172, 1151, 1008, 866 cm<sup>-1</sup>; HRMS–EI (*m/z*): [M]<sup>+</sup> calculated for C<sub>29</sub>H<sub>30</sub>O<sub>7</sub>S, 522.1712, found, 522.1722.

## Experimental procedures and spectroscopic data of PEDA/dehydration/aromatization sequence

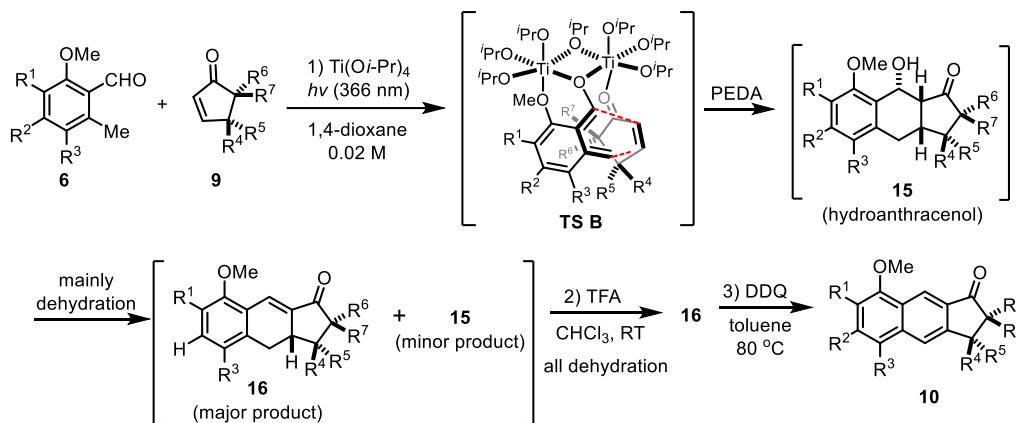

**General procedure C for PEDA reaction and dehydration:** To a solution of dienophile **9** (1.0 equiv.) and aromatic aldehyde **6** (1.5 equiv.) in anhydrous and degassed 1,4-dioxane (concentration for dienophile is 0.02 M) in quartz tube sealed with rubber plug was added titanium(IV) isopropoxide (2.0 equiv.) under  $\text{N}_2$ , after homogeneous mixing, the solution was photolyzed at room temperature in a Rayonet chamber reactor (16 lamps) at 366 nm until the dienophile **9** was completely consumed by TLC analysis. Then saturated  $\text{NaHCO}_3$  was added and stirred for 5 minutes. The mixture was filtered through silica gel and washed with ethyl acetate for six times, separated the organic layer and washed with brine. The organic layer was dried over anhydrous sodium sulfate, concentrated to obtain the crude dehydration product **16** with a part of hydroanthracenol product **15**. These crude products were dissolved in AR grade chloroform and then added TFA (2.0 equiv.) at room temperature. The solution was stirred at room temperature until the hydroanthracenol product **15** was consumed completely by TLC analysis. Then the mixture was quenched with saturated  $\text{NaHCO}_3$  at 0 °C and extracted with ethyl acetate for three times. The combined organic layers were dried over anhydrous sodium sulfate, concentrated, and purified by silica gel flash chromatography to obtain the corresponding product **16**.

**General procedure D for aromatization:** To a 0.01 M stirred solution of the above obtained product **16** in anhydrous toluene was added DDQ (3.0 equiv.) at room temperature and stirred at 80 °C until the starting material was consumed completely by TLC analysis. Then the mixture was quenched with saturated  $\text{Na}_2\text{SO}_3/\text{NaHCO}_3$  (v/v = 1:1) at 0 °C and extracted with ethyl acetate for three times. The combined organic layers were washed with saturated  $\text{Na}_2\text{SO}_3/\text{NaHCO}_3$  (v/v = 1:1) solution, brine, dried over anhydrous sodium sulfate, concentrated, and purified by silica gel flash chromatography to obtain the corresponding naphthalene product **10**.

All starting materials of **6** and **9** are known compounds except **9h** and **9i**.

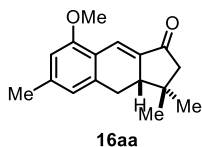

Compound **16aa** (58 mg, 36% yield for two steps) was prepared according to general procedure C from **9a** (70 mg, 0.63 mmol, 1.0 equiv.) and aldehyde **6a** (154 mg, 0.945 mmol, 1.5 equiv.). The PEDA reaction time was 45 min under  $\lambda_{\max} = 366$  nm UV light using anhydrous 1, 4-dioxane as solvent.  $R_f = 0.75$  (20% ethyl acetate – petroleum ether); Light yellow solid, m.p. 69 - 71 °C;  $^1\text{H NMR}$  (400 MHz, Chloroform-*d*)  $\delta$  7.65 (d,  $J = 2.7$  Hz, 1H), 6.61 (s, 1H), 6.54 (s, 1H), 3.81 (s, 3H), 2.87 – 2.66 (m, 3H), 2.33 (s, 3H), 2.29 (d,  $J = 7.7$  Hz, 2H), 1.25 (s, 3H), 0.97 (s, 3H) ppm;  $^{13}\text{C NMR}$  (100 MHz, Chloroform-*d*)  $\delta$  205.0, 157.9, 141.4, 137.9, 136.7, 124.5, 121.7, 119.3, 110.1, 55.51, 55.46, 46.2, 36.3, 28.6, 27.4, 24.1, 22.0 ppm; IR  $\nu_{\max}$  3053, 2962, 2848, 1735, 1682, 1265, 1099, 802, 705  $\text{cm}^{-1}$ ; HRMS–EI ( $m/z$ ):  $[\text{M}]^+$  calculated for  $\text{C}_{17}\text{H}_{20}\text{O}_2$ , 256.1463, found, 256.1467.

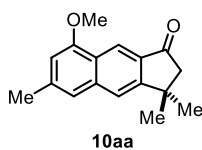

Compound **10aa** (58 mg, quantitative yield) was prepared according to general procedure D from the above obtained compound **16aa**.  $R_f = 0.45$  (10% ethyl acetate – petroleum ether); Light yellow solid, m.p. 125 - 127 °C;  $^1\text{H NMR}$  (400 MHz, Chloroform-*d*)  $\delta$  8.66 (s, 1H), 7.70 (s, 1H), 7.21 (s, 1H), 6.61 (s, 1H), 3.98 (s, 3H), 2.67 (s, 2H), 2.50 (s, 3H), 1.49 (s, 6H) ppm;  $^{13}\text{C NMR}$  (100 MHz, Chloroform-*d*)  $\delta$  206.0, 158.2, 157.4, 139.5, 138.7, 132.0, 123.5, 120.4, 119.2, 119.1, 106.0, 55.5, 53.8, 38.2, 30.5 (2C), 22.5 ppm; IR  $\nu_{\max}$  3054, 2960, 2916, 1708, 1627, 1267, 744  $\text{cm}^{-1}$ ; HRMS–EI ( $m/z$ ):  $[\text{M}]^+$  calculated for  $\text{C}_{17}\text{H}_{18}\text{O}_2$ , 254.1307, found, 254.1311.

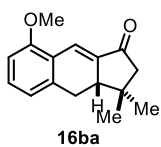

Compound **16ba** (91 mg, 47% yield for two steps) was prepared according to general procedure C from **9a** (88 mg, 0.8 mmol, 1.0 equiv.) and aldehyde **6b** (180 mg, 1.2 mmol, 1.5 equiv.). The PEDA reaction time was 1.75 hours under  $\lambda_{\max} = 366$  nm UV light using anhydrous 1, 4-dioxane as solvent.  $R_f = 0.32$  (5% ethyl acetate – petroleum ether); Light yellow solid, m.p. 63 - 65 °C;  $^1\text{H NMR}$  (400 MHz, Chloroform-*d*)  $\delta$  7.67 (d,  $J = 2.4$  Hz, 1H), 7.19 (t,  $J = 7.9$  Hz, 1H), 6.77 (d,  $J = 7.5$  Hz, 1H), 6.71 (d,  $J = 8.3$  Hz, 1H), 3.81 (s, 3H), 2.89 – 2.72 (m, 3H), 2.32 (d,  $J = 17.3$  Hz, 1H), 2.26 (d,  $J = 17.3$  Hz, 1H), 1.25 (s, 3H), 0.97 (s, 3H) ppm;  $^{13}\text{C NMR}$  (100 MHz, Chloroform-*d*)  $\delta$  205.0, 157.7, 137.9, 137.6, 130.6, 124.2, 121.8, 120.7, 109.1, 55.5, 55.3, 46.0, 36.2, 28.5, 27.3, 24.1 ppm; IR  $\nu_{\max}$  3055, 2958, 2837, 1707, 1629, 1573, 1309, 1267, 705  $\text{cm}^{-1}$ ; HRMS–EI ( $m/z$ ):  $[\text{M}]^+$  calculated for  $\text{C}_{16}\text{H}_{18}\text{O}_2$ , 242.1307, found, 242.1311.

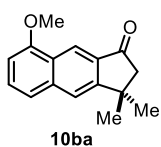

Compound **10ba** (83 mg, 92% yield) was prepared according to general procedure D from the above obtained compound **16ba**.  $R_f = 0.34$  (5% ethyl acetate – petroleum ether); Light yellow solid, m.p. 68 - 70 °C;  $^1\text{H NMR}$  (400 MHz, Chloroform-*d*)  $\delta$  8.72 (s, 1H), 7.81 (s, 1H), 7.45 (dt,  $J = 15.5, 8.3$  Hz, 2H), 6.77 (d,  $J = 7.6$  Hz, 1H), 3.99 (s, 3H), 2.68 (s, 2H), 1.49 (s, 6H) ppm;  $^{13}\text{C NMR}$  (100 MHz, Chloroform-*d*)  $\delta$  206.1, 157.9, 157.5, 138.4, 132.7, 128.9, 125.0, 121.2, 120.0, 119.2, 103.6, 55.5, 53.7,

38.3, 30.5 (2C) ppm; IR  $\nu_{\max}$  3056, 2959, 1708, 1627, 1311, 1267, 794, 746, 706  $\text{cm}^{-1}$ ; HRMS–EI ( $m/z$ ):  $[\text{M}]^+$  calculated for  $\text{C}_{16}\text{H}_{16}\text{O}_2$ , 240.1150, found, 240.1148.

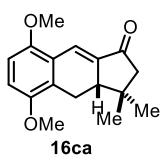

Compound **16ca** (120 mg, 55% yield for two steps) was prepared according to general procedure C from **9a** (88 mg, 0.8 mmol, 1.0 equiv.) and aldehyde **6c** (216 mg, 1.2 mmol, 1.5 equiv.). The PEDA reaction time was 45 minutes under  $\lambda_{\max} = 366$  nm UV light using anhydrous 1, 4-dioxane as solvent.  $R_f = 0.62$  (20% ethyl acetate – petroleum ether); Yellow solid, m.p. 128 - 130 °C;  $^1\text{H}$  NMR (400 MHz, Chloroform-*d*)  $\delta$  7.64 (d,  $J = 3.3$  Hz, 1H), 6.82 (d,  $J = 9.0$  Hz, 1H), 6.66 (d,  $J = 8.9$  Hz, 1H), 3.80 (s, 3H), 3.77 (s, 3H), 3.23 (dd,  $J = 16.0, 7.6$  Hz, 1H), 2.75 (ddd,  $J = 16.6, 7.6, 3.3$  Hz, 1H), 2.42 – 2.24 (m, 3H), 1.27 (s, 3H), 0.97 (s, 3H) ppm;  $^{13}\text{C}$  NMR (100 MHz, Chloroform-*d*)  $\delta$  205.5, 152.3, 150.7, 137.7, 125.4, 124.3, 122.8, 113.3, 109.0, 56.0, 55.9, 55.4, 45.4, 36.5, 27.3, 24.1, 20.8 ppm; IR  $\nu_{\max}$  3053, 2956, 2835, 1707, 1633, 1485, 1259, 1093, 796, 746  $\text{cm}^{-1}$ ; HRMS–EI ( $m/z$ ):  $[\text{M}]^+$  calculated for  $\text{C}_{17}\text{H}_{20}\text{O}_3$ , 272.1412, found, 272.1415.

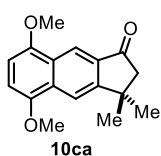

Compound **10ca** (114 mg, 96% yield) was prepared according to general procedure D from the above obtained compound **16ca**.  $R_f = 0.42$  (10% ethyl acetate – petroleum ether); Yellow solid, m.p. 122 - 124 °C;  $^1\text{H}$  NMR (400 MHz, Chloroform-*d*)  $\delta$  8.66 (s, 1H), 8.26 (s, 1H), 6.78 (d,  $J = 8.3$  Hz, 1H), 6.64 (d,  $J = 8.3$  Hz, 1H), 3.97 (s, 3H), 3.94 (s, 3H), 2.68 (s, 2H), 1.50 (s, 6H) ppm;  $^{13}\text{C}$  NMR (100 MHz, Chloroform-*d*)  $\delta$  206.3, 157.6, 151.3, 149.0, 133.0, 130.3, 125.7, 118.8, 115.9, 105.9, 102.9, 55.7 (2C), 53.8, 38.5, 30.6 (2C) ppm; IR  $\nu_{\max}$  3055, 2958, 1708, 1627, 1604, 1338, 1265, 1114, 804, 744  $\text{cm}^{-1}$ ; HRMS–EI ( $m/z$ ):  $[\text{M}]^+$  calculated for  $\text{C}_{17}\text{H}_{18}\text{O}_3$ , 270.1256, found, 270.1260.

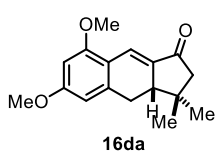

Compound **16da** (109 mg, 50% yield for two steps) was prepared according to general procedure C from **9a** (88 mg, 0.8 mmol, 1.0 equiv.) and aldehyde **6d** (216 mg, 1.2 mmol, 1.5 equiv.). The PEDA reaction time was 45 minutes under  $\lambda_{\max} = 366$  nm UV light using anhydrous 1, 4-dioxane as solvent.  $R_f = 0.28$  (10% ethyl acetate – petroleum ether); Yellow viscous oil;  $^1\text{H}$  NMR (400 MHz, Chloroform-*d*)  $\delta$  7.61 (d,  $J = 2.4$  Hz, 1H), 6.34 (d,  $J = 1.6$  Hz, 1H), 6.26 (d,  $J = 2.2$  Hz, 1H), 3.81 (s, 3H), 3.79 (s, 3H), 2.88 – 2.64 (m, 3H), 2.31 (d,  $J = 17.2$  Hz, 1H), 2.24 (d,  $J = 17.6$  Hz, 1H), 1.24 (s, 3H), 0.96 (s, 3H) ppm;  $^{13}\text{C}$  NMR (100 MHz, Chloroform-*d*)  $\delta$  204.9, 162.1, 159.2, 139.7, 134.9, 124.7, 115.3, 106.0, 96.2, 55.5, 55.4, 55.3, 46.1, 36.3, 29.2, 27.4, 24.1 ppm; IR  $\nu_{\max}$  2959, 2837, 1701, 1629, 1599, 1573, 1462, 1323, 1138, 744  $\text{cm}^{-1}$ ; HRMS–EI ( $m/z$ ):  $[\text{M}]^+$  calculated for  $\text{C}_{17}\text{H}_{20}\text{O}_3$ , 272.1412, found, 272.1410.

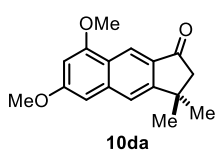

Compound **10da** (100 mg, 93% yield) was prepared according to general procedure D from the above obtained compound **16da**.  $R_f = 0.30$  (10% ethyl acetate – petroleum ether); Light yellow solid, m.p. 134 - 136 °C;  $^1\text{H}$  NMR (400 MHz, Chloroform-*d*)  $\delta$  8.58 (s, 1H), 7.66

(s, 1H), 6.72 (s, 1H), 6.42 (s, 1H), 3.93 (s, 3H), 3.91 (s, 3H), 2.64 (s, 2H), 1.47 (s, 6H) ppm;  $^{13}\text{C}$  NMR (100 MHz, Chloroform-*d*)  $\delta$  205.6, 160.7, 159.1, 158.5, 139.7, 130.8, 121.3, 119.8, 119.2, 97.8, 97.6, 55.6, 55.4, 53.6, 38.2, 30.4 (2C) ppm; IR  $\nu_{\text{max}}$  2958, 1703, 1627, 1585, 1325, 1271, 1161, 887, 827, 738  $\text{cm}^{-1}$ ; HRMS–EI ( $m/z$ ):  $[\text{M}]^+$  calculated for  $\text{C}_{17}\text{H}_{18}\text{O}_3$ , 270.1256, found, 270.1259.

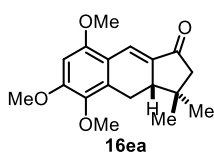

Compound **16ea** (99 mg, 41% yield for two steps) was prepared according to general procedure C from **9a** (88 mg, 0.8 mmol, 1.0 equiv.) and aldehyde **6e** (252 mg, 1.2 mmol, 1.5 equiv.). The PEDA reaction time was 45 minutes under  $\lambda_{\text{max}} = 366$  nm UV light using anhydrous 1, 4-dioxane as solvent.  $R_f = 0.40$  (20% ethyl acetate – petroleum ether); Yellow solid, m.p. 115 - 117 °C;  $^1\text{H}$  NMR (400 MHz, Chloroform-*d*)  $\delta$  7.59 (d,  $J = 3.2$  Hz, 1H), 6.31 (s, 1H), 3.88 (s, 3H), 3.80 (s, 3H), 3.74 (s, 3H), 3.20 (dd,  $J = 15.6, 7.0$  Hz, 1H), 2.71 (ddd,  $J = 16.3, 7.0, 3.2$  Hz, 1H), 2.39 (t,  $J = 16.0$  Hz, 1H), 2.31 (d,  $J = 17.2$  Hz, 1H), 2.23 (d,  $J = 17.2$  Hz, 1H), 1.26 (s, 3H), 0.96 (s, 3H) ppm;  $^{13}\text{C}$  NMR (100 MHz, Chloroform-*d*)  $\delta$  204.9, 155.3, 155.2, 140.4, 135.2, 131.0, 124.4, 114.8, 94.5, 60.6, 56.0, 55.8, 55.5, 45.6, 36.4, 27.3, 24.0, 21.6 ppm; IR  $\nu_{\text{max}}$  2960, 2839, 1703, 1575, 1487, 1273, 1267, 1140, 763, 747  $\text{cm}^{-1}$ ; HRMS–EI ( $m/z$ ):  $[\text{M}]^+$  calculated for  $\text{C}_{18}\text{H}_{22}\text{O}_4$ , 302.1518, found, 302.1521.

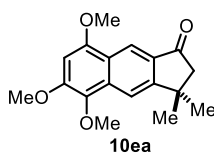

Compound **10ea** (99 mg, quantitative yield) was prepared according to general procedure D from the above obtained compound **16ea**.  $R_f = 0.44$  (20% ethyl acetate – petroleum ether); Yellow solid, m.p. 150 - 152 °C;  $^1\text{H}$  NMR (400 MHz, Chloroform-*d*)  $\delta$  8.61 (s, 1H), 8.03 (s, 1H), 6.60 (s, 1H), 4.02 (s, 3H), 3.98 (s, 3H), 3.93 (s, 3H), 2.66 (s, 2H), 1.50 (s, 6H) ppm;  $^{13}\text{C}$  NMR (100 MHz, Chloroform-*d*)  $\delta$  205.9, 158.5, 155.0, 151.0, 136.2, 133.5, 131.1, 120.7, 119.6, 114.4, 94.5, 61.1, 56.9, 55.8, 53.8, 38.4, 30.5 (2C) ppm; IR  $\nu_{\text{max}}$  2961, 2841, 1705, 1624, 1339, 1265, 1105, 764  $\text{cm}^{-1}$ ; HRMS–EI ( $m/z$ ):  $[\text{M}]^+$  calculated for  $\text{C}_{18}\text{H}_{20}\text{O}_4$ , 300.1362, found, 300.1359.

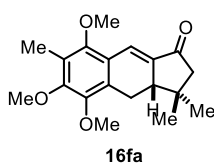

Compound **16fa** (175 mg, 69% yield for two steps) was prepared according to general procedure C from **9a** (88 mg, 0.8 mmol, 1.0 equiv.) and aldehyde **6f** (268 mg, 1.2 mmol, 1.5 equiv.). The PEDA reaction time was 45 minutes under  $\lambda_{\text{max}} = 366$  nm UV light using anhydrous 1, 4-dioxane as solvent.  $R_f = 0.60$  (20% ethyl acetate – petroleum ether); Yellow solid, m.p. 87 - 89 °C;  $^1\text{H}$  NMR (400 MHz, Chloroform-*d*)  $\delta$  7.47 (d,  $J = 3.3$  Hz, 1H), 3.84 (s, 3H), 3.79 (s, 3H), 3.68 (s, 3H), 3.18 (dd,  $J = 15.6, 7.2$  Hz, 1H), 2.75 (ddd,  $J = 16.4, 7.2, 3.3$  Hz, 1H), 2.40 (t,  $J = 16.3$  Hz, 1H), 2.33 (d,  $J = 17.6$  Hz, 1H), 2.27 (d,  $J = 17.2$  Hz, 1H), 2.15 (s, 3H), 1.27 (s, 3H), 0.97 (s, 3H) ppm;  $^{13}\text{C}$  NMR (100 MHz, Chloroform-*d*)  $\delta$  205.3, 154.5, 154.0, 147.1, 137.8, 128.1, 124.5, 123.5, 122.2, 62.1, 60.4, 60.3, 55.5, 45.9, 36.5, 27.4, 24.1, 21.2, 9.2 ppm; IR  $\nu_{\text{max}}$  2953, 1711, 1632, 1462, 1406, 1358, 1213, 1120, 1076, 735  $\text{cm}^{-1}$ ; HRMS–EI ( $m/z$ ):  $[\text{M}]^+$  calculated for  $\text{C}_{19}\text{H}_{24}\text{O}_4$ , 316.1675, found, 316.1679.

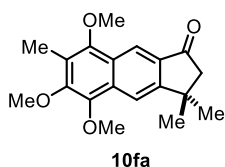

Compound **10fa** (137 mg, 79% yield) was prepared according to general procedure D from the above obtained compound **16fa**.  $R_f = 0.32$  (10% ethyl acetate – petroleum ether); Yellow solid, m.p. 117 - 119 °C;  $^1\text{H NMR}$  (400 MHz, Chloroform-*d*)  $\delta$  8.45 (s, 1H), 8.12 (s, 1H), 3.98 (s, 6H), 3.88 (s, 3H), 2.68 (s, 2H), 2.35 (s, 3H), 1.51 (s, 6H) ppm;  $^{13}\text{C NMR}$  (100 MHz, Chloroform-*d*)  $\delta$  206.3, 157.2, 152.4, 151.0, 143.1, 132.6, 132.2, 124.9, 123.5, 118.8, 115.4, 61.8, 60.9, 60.4, 53.8, 38.4, 30.6 (2C), 9.8 ppm; IR  $\nu_{\text{max}}$  2957, 1713, 1618, 1454, 1390, 1323, 1238, 1221, 1078, 1010  $\text{cm}^{-1}$ ; HRMS–EI ( $m/z$ ):  $[\text{M}]^+$  calculated for  $\text{C}_{19}\text{H}_{22}\text{O}_4$ , 314.1518, found, 314.1521.

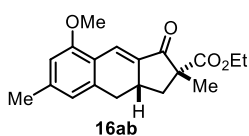

Compound **16ab** (81 mg, 64% yield for two steps) was prepared according to general procedure C from **9b** (67 mg, 0.4 mmol, 1.0 equiv.) and aldehyde **6a** (98 mg, 0.6 mmol, 1.5 equiv.). The PEDA reaction time was 45 minutes under  $\lambda_{\text{max}} = 366$  nm UV light using anhydrous 1, 4-dioxane as solvent.  $R_f = 0.28$  (10% ethyl acetate – petroleum ether); Yellow solid, m.p. 98 - 100 °C;  $^1\text{H NMR}$  (400 MHz, Chloroform-*d*)  $\delta$  7.77 (d,  $J = 3.0$  Hz, 1H), 6.61 (s, 1H), 6.57 (s, 1H), 4.10 (qd,  $J = 7.1, 1.2$  Hz, 2H), 3.83 (s, 3H), 3.17 – 3.05 (m, 1H), 2.95 (dd,  $J = 15.2, 6.7$  Hz, 1H), 2.83 (dd,  $J = 12.8, 7.4$  Hz, 1H), 2.53 (t,  $J = 15.7$  Hz, 1H), 2.34 (s, 3H), 1.46 (dd,  $J = 12.8, 10.8$  Hz, 1H), 1.44 (s, 3H), 1.18 (t,  $J = 7.1$  Hz, 3H) ppm;  $^{13}\text{C NMR}$  (100 MHz, Chloroform-*d*)  $\delta$  201.4, 172.2, 158.0, 142.0, 138.4, 136.3, 126.6, 121.5, 119.7, 110.2, 61.3, 57.5, 55.5, 41.2, 35.9, 33.0, 22.0, 20.5, 14.0 ppm; IR  $\nu_{\text{max}}$  2982, 2932, 1736, 1705, 1564, 1501, 1148, 1248, 1194, 798  $\text{cm}^{-1}$ ; HRMS–EI ( $m/z$ ):  $[\text{M}]^+$  calculated for  $\text{C}_{19}\text{H}_{22}\text{O}_4$ , 314.1518, found, 314.1521.

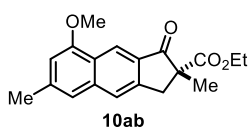

Compound **10ab** (66 mg, 83% yield) was prepared according to general procedure D from the above obtained compound **16ab**.  $R_f = 0.30$  (10% ethyl acetate – petroleum ether); Yellow solid, m.p. 105 - 107 °C;  $^1\text{H NMR}$  (400 MHz, Chloroform-*d*)  $\delta$  8.75 (s, 1H), 7.69 (s, 1H), 7.19 (s, 1H), 6.63 (s, 1H), 4.14 (q,  $J = 7.1$  Hz, 2H), 3.99 (s, 3H), 3.82 (d,  $J = 17.1$  Hz, 1H), 3.11 (d,  $J = 17.2$  Hz, 1H), 2.51 (s, 3H), 1.55 (s, 3H), 1.17 (t,  $J = 7.1$  Hz, 3H) ppm;  $^{13}\text{C NMR}$  (100 MHz, Chloroform-*d*)  $\delta$  203.5, 172.3, 157.3, 146.1, 140.1, 138.9, 131.2, 123.8, 123.2, 121.1, 118.9, 106.2, 61.4, 56.7, 55.6, 39.6, 22.6, 21.2, 14.0 ppm; IR  $\nu_{\text{max}}$  2984, 1742, 1709, 1630, 1504, 1323, 1296, 1092, 1014, 737  $\text{cm}^{-1}$ ; HRMS–EI ( $m/z$ ):  $[\text{M}]^+$  calculated for  $\text{C}_{19}\text{H}_{20}\text{O}_4$ , 312.1362, found, 312.1365.

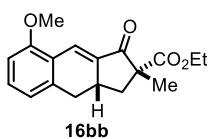

Compound **16bb** (128 mg, 85% yield for two steps) was prepared according to general procedure C from **9b** (84 mg, 0.5 mmol, 1.0 equiv.) and aldehyde **6b** (112 mg, 0.75 mmol, 1.5 equiv.). The PEDA reaction time was 45 minutes under  $\lambda_{\text{max}} = 366$  nm UV light using anhydrous 1, 4-dioxane as solvent.  $R_f = 0.44$  (20% ethyl acetate – petroleum ether); Light yellow viscous oil;  $^1\text{H NMR}$  (400 MHz, Chloroform-*d*)  $\delta$  7.78 (d,  $J = 3.1$  Hz, 1H), 7.22 (t,  $J = 7.9$  Hz, 1H), 6.77 (d,  $J = 7.6$  Hz, 1H), 6.75 (d,  $J = 8.4$  Hz, 1H), 4.10 (qd,  $J = 7.1, 0.4$  Hz, 2H), 3.84 (s, 3H), 3.18 – 3.07 (m, 1H), 3.01 (dd,  $J =$

15.2, 6.7 Hz, 1H), 2.84 (dd,  $J = 12.8, 7.4$  Hz, 1H), 2.55 (t,  $J = 15.7$  Hz, 1H), 1.48 (dd,  $J = 12.9, 10.8$  Hz, 1H), 1.44 (s, 3H), 1.18 (t,  $J = 7.1$  Hz, 3H) ppm;  $^{13}\text{C}$  NMR (100 MHz, Chloroform-*d*)  $\delta$  201.5, 172.0, 158.0, 138.4, 137.3, 131.0, 126.3, 122.1, 120.4, 109.3, 61.3, 57.4, 55.5, 41.2, 35.7, 32.8, 20.4, 14.0 ppm; IR  $\nu_{\text{max}}$  2983, 1739, 1626, 1447, 1300, 1269, 1248, 1194, 1128, 783  $\text{cm}^{-1}$ ; HRMS–EI ( $m/z$ ):  $[\text{M}]^+$  calculated for  $\text{C}_{18}\text{H}_{20}\text{O}_4$ , 300.1362, found, 300.1358.

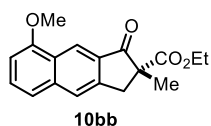

Compound **10bb** (106 mg, 83% yield) was prepared according to general procedure D from the above obtained compound **16bb**.  $R_f = 0.46$  (20% ethyl acetate – petroleum ether); Light brown solid, m.p. 69 - 71  $^{\circ}\text{C}$ ;  $^1\text{H}$  NMR (400 MHz, Chloroform-*d*)  $\delta$  8.82 (s, 1H), 7.79 (s, 1H), 7.49 (d,  $J = 7.8$  Hz, 1H), 7.40 (d,  $J = 8.4$  Hz, 1H), 6.78 (d,  $J = 7.5$  Hz, 1H), 4.14 (q,  $J = 7.1$  Hz, 2H), 4.00 (s, 3H), 3.84 (d,  $J = 17.1$  Hz, 1H), 3.13 (d,  $J = 17.6$  Hz, 1H), 1.56 (s, 3H), 1.17 (t,  $J = 7.1$  Hz, 3H) ppm;  $^{13}\text{C}$  NMR (100 MHz, Chloroform-*d*)  $\delta$  203.5, 172.2, 157.5, 145.7, 138.6, 131.8, 129.4, 125.3, 124.0, 121.1, 119.8, 103.8, 61.4, 56.7, 55.6, 39.6, 21.1, 14.0 ppm; IR  $\nu_{\text{max}}$  2981, 2934, 1742, 1628, 1379, 1292, 1269, 1131, 986, 797  $\text{cm}^{-1}$ ; HRMS–EI ( $m/z$ ):  $[\text{M}]^+$  calculated for  $\text{C}_{18}\text{H}_{18}\text{O}_4$ , 298.1205, found, 298.1202.

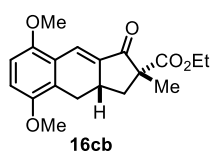

Compound **16cb** (149 mg, 90% yield for two steps) was prepared according to general procedure C from **9b** (84 mg, 0.5 mmol, 1.0 equiv.) and aldehyde **6c** (135 mg, 0.75 mmol, 1.5 equiv.). The PEDA reaction time was 45 minutes under  $\lambda_{\text{max}} = 366$  nm UV light using anhydrous 1, 4-dioxane as solvent.  $R_f = 0.4$  (20% ethyl acetate – petroleum ether); Yellow solid, m.p. 95 - 97  $^{\circ}\text{C}$ ;  $^1\text{H}$  NMR (500 MHz, Chloroform-*d*)  $\delta$  7.75 (d,  $J = 3.1$  Hz, 1H), 6.85 (d,  $J = 8.9$  Hz, 1H), 6.69 (d,  $J = 9.0$  Hz, 1H), 4.14 – 4.06 (m, 2H), 3.80 (s, 3H), 3.79 (s, 3H), 3.47 (dd,  $J = 16.0, 7.3$  Hz, 1H), 3.09 - 2.99 (m, 1H), 2.85 (dd,  $J = 12.8, 7.5$  Hz, 1H), 2.12 (t,  $J = 16.1$  Hz, 1H), 1.49 (dd,  $J = 12.6, 11.1$  Hz, 1H), 1.44 (s, 3H), 1.18 (t,  $J = 7.1$  Hz, 3H) ppm;  $^{13}\text{C}$  NMR (125 MHz, Chloroform-*d*)  $\delta$  201.8, 172.1, 152.5, 150.4, 137.5, 126.2, 126.1, 123.2, 113.8, 109.1, 61.3, 57.4, 56.1, 55.9, 41.4, 32.2, 28.0, 20.4, 14.0 ppm; IR  $\nu_{\text{max}}$  2984, 2833, 1739, 1630, 1583, 1485, 1298, 1265, 1078, 796  $\text{cm}^{-1}$ ; HRMS–EI ( $m/z$ ):  $[\text{M}]^+$  calculated for  $\text{C}_{19}\text{H}_{22}\text{O}_5$ , 330.1467, found, 330.1464.

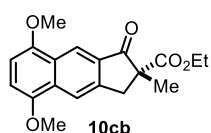

Compound **10cb** (77 mg, 52% yield) was prepared according to general procedure D from the above obtained compound **16cb**.  $R_f = 0.4$  (20% ethyl acetate – petroleum ether); Yellow viscous oil;  $^1\text{H}$  NMR (400 MHz, Chloroform-*d*)  $\delta$  8.76 (s, 1H), 8.25 (s, 1H), 6.81 (d,  $J = 8.3$  Hz, 1H), 6.67 (d,  $J = 8.3$  Hz, 1H), 4.13 (q,  $J = 7.1$  Hz, 2H), 3.97 (s, 3H), 3.96 (s, 3H), 3.85 (d,  $J = 17.1$  Hz, 1H), 3.15 (d,  $J = 17.1$  Hz, 1H), 1.55 (s, 3H), 1.16 (t,  $J = 7.1$  Hz, 3H) ppm;  $^{13}\text{C}$  NMR (100 MHz, Chloroform-*d*)  $\delta$  203.8, 172.2, 151.3, 149.0, 145.5, 132.3, 130.5, 126.0, 120.7, 118.8, 106.5, 103.1, 61.4, 56.8, 55.9, 55.8,



39.9, 21.1, 14.0 ppm; IR  $\nu_{\max}$  2981, 2933, 1738, 1731, 1342, 1292, 1265, 1182, 1022, 995, 804  $\text{cm}^{-1}$ ; HRMS–EI ( $m/z$ ):  $[M]^+$  calculated for  $\text{C}_{19}\text{H}_{20}\text{O}_5$ , 328.1311, found, 328.1313.

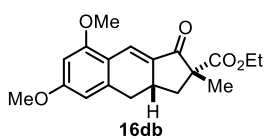

Compound **16db** (112 mg, 68% yield for two steps) was prepared according to general procedure C from **9b** (84 mg, 0.5 mmol, 1.0 equiv.) and aldehyde **6d** (135 mg, 0.75 mmol, 1.5 equiv.). The PEDA reaction time was 45 minutes under  $\lambda_{\max} = 366$  nm UV

light using anhydrous 1, 4-dioxane as solvent.  $R_f = 0.38$  (20% ethyl acetate – petroleum ether); Yellow solid, m.p. 94 - 96  $^{\circ}\text{C}$ ;  $^1\text{H}$  NMR (400 MHz, Chloroform- $d$ )  $\delta$  7.71 (d,  $J = 2.6$  Hz, 1H), 6.32 (s, 1H), 6.27 (s, 1H), 4.08 (q,  $J = 7.1$  Hz, 2H), 3.81 (s, 6H), 3.18 – 3.03 (m, 1H), 2.93 (dd,  $J = 15.2, 6.6$  Hz, 1H), 2.81 (dd,  $J = 12.7, 7.4$  Hz, 1H), 2.52 (t,  $J = 15.7$  Hz, 1H), 1.46 (d,  $J = 11.8$  Hz, 1H), 1.41 (s, 3H), 1.17 (td,  $J = 7.1, 1.4$  Hz, 3H) ppm;  $^{13}\text{C}$  NMR (100 MHz, Chloroform- $d$ )  $\delta$  201.0, 172.1, 162.5, 159.4, 140.1, 134.5, 126.6, 115.6, 105.8, 96.3, 61.2, 57.4, 55.5, 55.3, 41.2, 36.4, 32.8, 20.5, 14.0 ppm; IR  $\nu_{\max}$  2978, 2935, 1734, 1697, 1597, 1570, 1456, 1271, 1249, 1223  $\text{cm}^{-1}$ ; HRMS–EI ( $m/z$ ):  $[M]^+$  calculated for  $\text{C}_{19}\text{H}_{22}\text{O}_5$ , 330.1467, found, 330.1464.

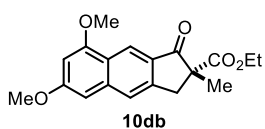

Compound **10db** (89 mg, 80% yield) was prepared according to general procedure D from the above obtained compound **16db**.  $R_f = 0.38$  (20% ethyl acetate – petroleum ether); Light yellow solid, m.p. 92 - 94  $^{\circ}\text{C}$ ;  $^1\text{H}$  NMR (400 MHz, Chloroform- $d$ )  $\delta$  8.67

(s, 1H), 7.63 (s, 1H), 6.68 (d,  $J = 1.9$  Hz, 1H), 6.44 (d,  $J = 2.0$  Hz, 1H), 4.14 (q,  $J = 7.1$  Hz, 2H), 3.95 (s, 3H), 3.92 (s, 3H), 3.80 (d,  $J = 17.1$  Hz, 1H), 3.08 (d,  $J = 17.1$  Hz, 1H), 1.54 (s, 3H), 1.17 (t,  $J = 7.1$  Hz, 3H) ppm;  $^{13}\text{C}$  NMR (100 MHz, Chloroform- $d$ )  $\delta$  203.1, 172.3, 161.2, 158.5, 147.0, 140.0, 129.9, 122.6, 121.6, 121.1, 97.8, 97.7, 61.4, 56.7, 55.6, 55.4, 39.6, 21.2, 14.0 ppm; IR  $\nu_{\max}$  2982, 2935, 1739, 1705, 1624, 1585, 1323, 1296, 1159, 1086  $\text{cm}^{-1}$ ; HRMS–EI ( $m/z$ ):  $[M]^+$  calculated for  $\text{C}_{19}\text{H}_{20}\text{O}_5$ , 328.1311, found, 328.1313.

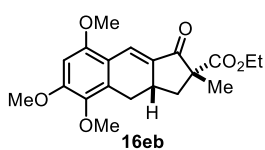

Compound **16eb** (135 mg, 75% yield for two steps) was prepared according to general procedure C from **9b** (84 mg, 0.5 mmol, 1.0 equiv.) and aldehyde **6e** (157 mg, 0.75 mmol, 1.5 equiv.). The PEDA reaction time was 45 minutes under  $\lambda_{\max} = 366$  nm UV

light using anhydrous 1, 4-dioxane as solvent.  $R_f = 0.3$  (20% ethyl acetate – petroleum ether); Yellow solid, m.p. 98 - 100  $^{\circ}\text{C}$ ;  $^1\text{H}$  NMR (400 MHz, Chloroform- $d$ )  $\delta$  7.71 (d,  $J = 2.9$  Hz, 1H), 6.33 (s, 1H), 4.08 (q,  $J = 7.1$  Hz, 2H), 3.89 (s, 3H), 3.83 (s, 3H), 3.72 (s, 3H), 3.44 (dd,  $J = 15.7, 6.8$  Hz, 1H), 3.08 – 2.94 (m, 1H), 2.84 (dd,  $J = 12.7, 7.4$  Hz, 1H), 2.17 (t,  $J = 15.7$  Hz, 1H), 1.47 (t,  $J = 11.8$  Hz, 1H), 1.42 (s, 3H), 1.17 (t,  $J = 7.1$  Hz, 3H) ppm;  $^{13}\text{C}$  NMR (100 MHz, Chloroform- $d$ )  $\delta$  201.3, 172.2, 155.7, 155.5, 140.1, 134.8, 131.5, 126.5, 115.2, 94.5, 61.3, 60.6, 57.5, 56.0, 55.8, 41.4, 32.5, 28.8, 20.5, 14.0 ppm; IR  $\nu_{\max}$  2980, 2933, 1705, 1626, 1591, 1489, 1325, 1269, 1203, 1124  $\text{cm}^{-1}$ ; HRMS–EI ( $m/z$ ):  $[M]^+$  calculated for  $\text{C}_{20}\text{H}_{24}\text{O}_6$  360.1573, found, 360.1578.

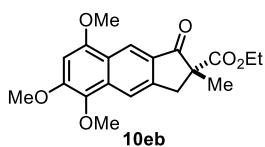

Compound **10eb** (98 mg, 73% yield) was prepared according to general procedure D from the above obtained compound **16eb**.  $R_f = 0.32$  (20% ethyl acetate – petroleum ether); Yellow solid, m.p. 128 - 130 °C;  $^1\text{H NMR}$  (400 MHz, Chloroform-*d*)  $\delta$  8.71 (s, 1H), 8.02 (s, 1H), 6.61 (s, 1H), 4.13 (q,  $J = 7.1$  Hz, 2H), 4.03 (s, 3H), 3.99 (s, 3H), 3.91 (s, 3H), 3.83 (d,  $J = 17.5$  Hz, 1H), 3.13 (d,  $J = 17.3$  Hz, 1H), 1.54 (s, 3H), 1.17 (t,  $J = 7.1$  Hz, 3H) ppm;  $^{13}\text{C NMR}$  (100 MHz, Chloroform-*d*)  $\delta$  203.4, 172.3, 155.0, 151.4, 146.4, 135.9, 133.6, 130.1, 121.5, 120.9, 117.2, 94.5, 61.4, 61.1, 56.8, 56.7, 55.8, 39.8, 21.2, 14.0 ppm; IR  $\nu_{\text{max}}$  2984, 2935, 1739, 1709, 1618, 1338, 1296, 1269, 1236, 997  $\text{cm}^{-1}$ ; HRMS–EI ( $m/z$ ):  $[\text{M}]^+$  calculated for  $\text{C}_{20}\text{H}_{22}\text{O}_6$ , 358.1416, found, 358.1418.

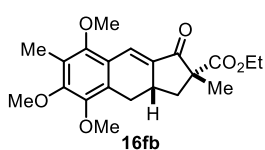

Compound **16fb** (165 mg, 88% yield for two steps) was prepared according to general procedure C from **9b** (84 mg, 0.5 mmol, 1.0 equiv.) and aldehyde **6f** (168 mg, 0.75 mmol, 1.5 equiv.). The PED A reaction time was 45 minutes under  $\lambda_{\text{max}} = 366$  nm UV

light using anhydrous 1, 4-dioxane as solvent.  $R_f = 0.4$  (20% ethyl acetate – petroleum ether); Yellow solid, m.p. 102 - 105 °C;  $^1\text{H NMR}$  (400 MHz, Chloroform-*d*)  $\delta$  7.60 (d,  $J = 3.1$  Hz, 1H), 4.11 (q,  $J = 7.1$  Hz, 2H), 3.85 (s, 3H), 3.77 (s, 3H), 3.72 (s, 3H), 3.41 (dd,  $J = 15.7, 7.0$  Hz, 1H), 3.11 – 2.96 (m, 1H), 2.87 (dd,  $J = 12.8, 7.5$  Hz, 1H), 2.24 – 2.13 (m,  $\text{CH}_3 + 1/2 \text{CH}_2$ , 4H), 1.50 (dd,  $J = 12.8, 10.8$  Hz, 1H), 1.44 (s, 3H), 1.19 (t,  $J = 7.1$  Hz, 3H) ppm;  $^{13}\text{C NMR}$  (100 MHz,  $\text{CDCl}_3$ )  $\delta$  201.8, 172.0, 154.7, 154.3, 146.8, 137.3, 128.6, 126.5, 123.7, 122.5, 62.2, 61.4, 60.4, 60.3, 57.5, 41.3, 32.7, 28.4, 20.5, 14.0, 9.2 ppm; IR  $\nu_{\text{max}}$  2983, 2936, 1738, 1707, 1626, 1460, 1406, 1296, 1078, 1008  $\text{cm}^{-1}$ ; HRMS–EI ( $m/z$ ):  $[\text{M}]^+$  calculated for  $\text{C}_{21}\text{H}_{26}\text{O}_6$ , 374.1729, found, 374.1726.

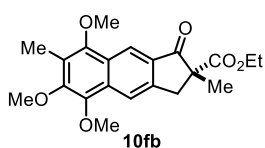

Compound **10fb** (136 mg, 83% yield) was prepared according to general procedure D from the above obtained compound **16fb**.  $R_f = 0.4$  (20% ethyl acetate – petroleum ether);

Yellow viscous oil;  $^1\text{H NMR}$  (400 MHz, Chloroform-*d*)  $\delta$  8.55 (s, 1H), 8.11 (s, 1H), 4.15 (q,  $J = 7.1$  Hz, 2H), 4.00 (s, 3H), 3.97 (s, 3H), 3.89 (s, 3H), 3.85 (d,  $J = 17.2$  Hz, 1H), 3.15 (d,  $J = 17.2$  Hz, 1H), 2.36 (s, 3H), 1.56 (s, 3H), 1.18 (t,  $J = 7.1$  Hz, 3H) ppm;  $^{13}\text{C NMR}$  (100 MHz, Chloroform-*d*)  $\delta$  203.8, 172.2, 152.4, 151.5, 145.0, 142.9, 132.4, 131.7, 125.1, 123.7, 120.7, 118.3, 61.9, 61.5, 61.0, 60.5, 56.8, 39.8, 21.2, 14.0, 9.9 ppm; IR  $\nu_{\text{max}}$  2984, 2935, 1741, 1620, 1456, 1390, 1325, 1294, 1190, 1012  $\text{cm}^{-1}$ ; HRMS–EI ( $m/z$ ):  $[\text{M}]^+$  calculated for  $\text{C}_{21}\text{H}_{24}\text{O}_6$ , 372.1573, found, 372.1577.

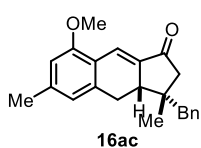

Compound **16ac** (135 mg, 58% yield for two steps, mixture of two isomers, d.r. = 1:1) was prepared according to general procedure C from **9c** (130 mg, 0.7 mmol, 1.0 equiv.) and aldehyde **6a** (172 mg, 1.05 mmol, 1.5 equiv.). The PED A reaction time was 45 minutes

under  $\lambda_{\text{max}} = 366$  nm UV light using anhydrous 1, 4-dioxane as solvent. One isomer:  $R_f = 0.20$  (5% ethyl

acetate – petroleum ether), the other isomer:  $R_f = 0.24$  (5% ethyl acetate – petroleum ether); Light yellow viscous oil;  $^1\text{H NMR}$  (400 MHz, Chloroform-*d*, mixture of two isomers)  $\delta$  7.64 (d,  $J = 2.0$  Hz, 1H), 7.55 (d,  $J = 3.1$  Hz, 1H), 7.24 – 7.10 (m, 6H), 7.06 (d,  $J = 6.8$  Hz, 2H), 7.00 (d,  $J = 7.0$  Hz, 2H), 6.56 (s, 1H), 6.47 (s, 2H), 6.44 (s, 1H), 3.73 (s, 3H), 3.69 (s, 3H), 2.99 – 2.56 (m, 7H), 2.53 – 2.30 (m, 5H), 2.25 (s, 3H), 2.23 (s, 3H), 2.06 (d,  $J = 17.1$  Hz, 1H), 1.82 (d,  $J = 17.5$  Hz, 1H), 1.13 (s, 3H), 0.89 (s, 3H) ppm;  $^{13}\text{C NMR}$  (125 MHz, Chloroform-*d*, mixture of two isomers)  $\delta$  204.7, 204.3, 157.9, 157.7, 141.6, 141.5, 138.2, 137.8, 137.6 (2C), 136.3, 136.1, 130.8 (2C), 130.1 (2C), 128.1 (2C), 128.0 (2C), 126.4, 126.1, 124.7, 124.6, 121.8, 121.6, 119.2, 119.1, 110.1, 110.0, 55.5, 55.4, 52.9, 50.3, 47.7, 46.4, 43.6, 41.6, 40.5, 39.9, 28.8, 27.9, 24.4, 22.8, 21.98, 21.95 ppm; IR  $\nu_{\text{max}}$  2962, 1707, 1634, 1607, 1566, 1458, 1408, 1300, 1010  $\text{cm}^{-1}$ ; HRMS–EI ( $m/z$ ):  $[\text{M}]^+$  calculated for  $\text{C}_{23}\text{H}_{24}\text{O}_2$ , 332.1776, found, 332.1772.

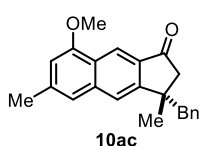

Compound **10ac** (135 mg, quantitative yield) was prepared according to general procedure

D from the above obtained compound **16ac**.  $R_f = 0.22$  (5% ethyl acetate – petroleum ether);

Light yellow viscous oil;  $^1\text{H NMR}$  (400 MHz, Chloroform-*d*)  $\delta$  8.60 (s, 1H), 7.65 (s, 1H), 7.22 (s, 1H), 7.20 – 7.09 (m, 3H), 6.90 (dd,  $J = 7.3, 2.0$  Hz, 2H), 6.64 (s, 1H), 3.99 (s, 3H), 3.10 (d,  $J = 13.3$  Hz, 1H), 2.98 (d,  $J = 13.3$  Hz, 1H), 2.90 (d,  $J = 18.6$  Hz, 1H), 2.53 (s, 3H), 2.47 (d,  $J = 18.6$  Hz, 1H), 1.56 (s, 3H) ppm;  $^{13}\text{C NMR}$  (100 MHz, Chloroform-*d*)  $\delta$  205.3, 157.3, 156.2, 139.5, 138.3, 137.6, 132.7, 130.3 (2C), 127.9 (2C), 126.5, 123.6, 121.4, 119.2, 119.0, 106.1, 55.5, 50.7, 48.8, 42.7, 28.6, 22.5 ppm; IR  $\nu_{\text{max}}$  3030, 2916, 1709, 1582, 1499, 1452, 1298, 1265, 1194, 737  $\text{cm}^{-1}$ ; HRMS–EI ( $m/z$ ):  $[\text{M}]^+$  calculated for  $\text{C}_{23}\text{H}_{22}\text{O}_2$ , 330.1620, found, 330.1617.

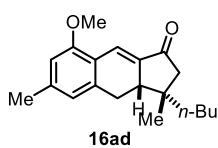

Compound **16ad** (94 mg, 45% yield for two steps, mixture of two isomers, d.r. = 1:1) was

prepared according to general procedure C from **9d** (106 mg, 0.7 mmol, 1.0 equiv.) and aldehyde **6a** (172 mg, 1.05 mmol, 1.5 equiv.). The PEDA reaction time was 45 minutes

under  $\lambda_{\text{max}} = 366$  nm UV light using anhydrous 1, 4-dioxane as solvent.  $R_f = 0.28$  (5% ethyl acetate – petroleum ether); Light yellow viscous oil;  $^1\text{H NMR}$  (400 MHz, Chloroform-*d*, mixture of two isomers)  $\delta$  7.65 (d,  $J = 2.7$  Hz, 1H), 7.61 (d,  $J = 2.1$  Hz, 1H), 6.60 (d,  $J = 3.3$  Hz, 2H), 6.53 (s, 2H), 3.80 (s, 6H), 2.91 – 2.63 (m, 6H), 2.51 (d,  $J = 17.5$  Hz, 1H), 2.32 (s, 6H), 2.24 (t,  $J = 17.1$  Hz, 2H), 2.14 (d,  $J = 17.5$  Hz, 1H), 1.66 – 1.54 (m, 1H), 1.47 – 1.42 (m, 1H), 1.39 – 1.23 (m, 10H), 1.20 (s, 3H), 0.95 (s, 3H), 0.92 (t,  $J = 6.8$  Hz, 3H), 0.86 (t,  $J = 5.8$  Hz, 3H) ppm;  $^{13}\text{C NMR}$  (100 MHz, Chloroform-*d*, mixture of two isomers)  $\delta$  205.1, 205.0, 157.8, 157.7, 141.4, 141.3, 137.88, 137.87, 137.1, 136.5, 124.5, 123.7, 121.71, 121.66, 119.28, 119.26, 110.0, 109.9, 55.4 (2C), 53.5, 51.7, 47.4, 45.4, 41.2, 39.4, 38.8, 36.2, 29.3, 28.2, 27.5, 26.8, 25.6, 23.5, 23.4, 21.94 (2C), 21.89,

14.04, 13.96 ppm; IR  $\nu_{\max}$  2916, 1709, 1607, 1447, 1265, 1194, 1080, 739  $\text{cm}^{-1}$ ; HRMS–EI ( $m/z$ ):  $[\text{M}]^+$  calculated for  $\text{C}_{20}\text{H}_{26}\text{O}_2$ , 298.1933, found, 298.1929.

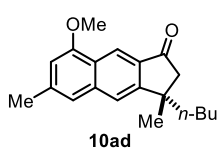

Compound **10ad** (94 mg, 90% yield) was prepared according to general procedure D from the above obtained compound **16ad**.  $R_f = 0.30$  (5% ethyl acetate – petroleum ether); Light Yellow solid, m.p. 83 - 85 °C;  $^1\text{H}$  NMR (400 MHz, Chloroform- $d$ )  $\delta$  8.66 (s, 1H), 7.66 (s, 1H), 7.22 (s, 1H), 6.61 (s, 1H), 3.98 (s, 3H), 2.75 (d,  $J = 18.8$  Hz, 1H), 2.53 (d,  $J = 19.2$  Hz, 1H), 2.50 (s, 3H), 1.81 – 1.68 (m, 2H), 1.47 (s, 3H), 1.31 – 1.13 (m, 3H), 1.00 – 0.87 (m, 1H), 0.81 (t,  $J = 7.1$  Hz, 3H) ppm;  $^{13}\text{C}$  NMR (100 MHz, Chloroform- $d$ )  $\delta$  206.2, 157.3, 157.2, 139.4, 138.6, 132.8, 123.5, 120.7, 119.1, 119.0, 105.9, 55.5, 51.1, 42.7, 41.6, 28.9, 27.2, 23.1, 22.5, 13.9 ppm; IR  $\nu_{\max}$  2955, 2928, 1711, 1580, 1502, 1396, 1325, 1196, 1115, 736  $\text{cm}^{-1}$ ; HRMS–EI ( $m/z$ ):  $[\text{M}]^+$  calculated for  $\text{C}_{20}\text{H}_{24}\text{O}_2$ , 296.1776, found, 296.1775.

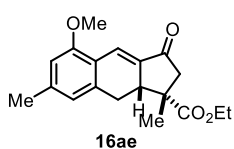

Compound **16ae** (111 mg, 88% yield for two steps, mixture of two isomers, d.r. = 2:1) was prepared according to general procedure C from **9e** (67 mg, 0.4 mmol, 1.0 equiv.) and aldehyde **6a** (98 mg, 0.6 mmol, 1.5 equiv.). The PEDA reaction time was 45 minutes under  $\lambda_{\max} = 366$  nm UV light using anhydrous 1, 4-dioxane as solvent. One isomer,  $R_f = 0.6$  (20% ethyl acetate – petroleum ether), the other isomer:  $R_f = 0.44$  (20% ethyl acetate – petroleum ether); One isomer: light yellow viscous oil, the other isomer: light yellow solid, m.p. 85 - 87 °C; One isomer:  $^1\text{H}$  NMR (400 MHz, Chloroform- $d$ )  $\delta$  7.74 (d,  $J = 3.2$  Hz, 1H), 6.62 (s, 1H), 6.55 (s, 1H), 4.21 (q,  $J = 7.1$  Hz, 2H), 3.82 (s, 3H), 3.38 (ddd,  $J = 13.4, 10.6, 3.2$  Hz, 1H), 2.94 (t,  $J = 17.6$  Hz, 2H), 2.87 (d,  $J = 10.3$  Hz, 1H), 2.42 (d,  $J = 17.6$  Hz, 1H), 2.33 (s, 3H), 1.30 (t,  $J = 7.1$  Hz, 3H), 1.27 (s, 3H) ppm,  $^{13}\text{C}$  NMR (100 MHz, Chloroform- $d$ )  $\delta$  202.3, 176.0, 158.0, 142.1, 137.6, 134.1, 126.2, 121.8, 119.0, 110.2, 61.1, 55.5, 51.1, 46.1, 42.8, 29.5, 22.0, 20.0, 14.2 ppm; The other isomer:  $^1\text{H}$  NMR (400 MHz, Chloroform- $d$ )  $\delta$  7.64 (d,  $J = 3.2$  Hz, 1H), 6.59 (s, 1H), 6.56 (s, 1H), 4.09 (q,  $J = 7.1$  Hz, 2H), 3.81 (s, 3H), 2.96 (ddd,  $J = 16.5, 6.8, 3.2$  Hz, 1H), 2.90 (dd,  $J = 17.2, 6.8$  Hz, 1H), 2.85 (d,  $J = 17.6$  Hz, 1H), 2.46 (t,  $J = 15.7$  Hz, 1H), 2.32 (s, 3H), 2.28 (d,  $J = 17.6$  Hz, 1H), 1.48 (s, 3H), 1.17 (t,  $J = 7.1$  Hz, 3H) ppm,  $^{13}\text{C}$  NMR (100 MHz, Chloroform- $d$ )  $\delta$  202.4, 174.7, 157.9, 141.6, 136.9, 135.5, 123.7, 121.6, 119.2, 110.3, 60.9, 55.5, 50.7, 47.7, 46.9, 30.4, 22.6, 22.0, 14.1 ppm; IR  $\nu_{\max}$  2978, 1714, 1633, 1606, 1568, 1460, 1311, 1240, 1188, 1020  $\text{cm}^{-1}$ ; HRMS–EI ( $m/z$ ):  $[\text{M}]^+$  calculated for  $\text{C}_{19}\text{H}_{22}\text{O}_4$ , 314.1518, found, 314.1522.

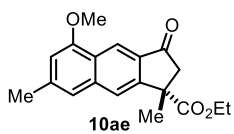

Compound **10ae** (97 mg, 88% yield) was prepared according to general procedure D from the above obtained compound **16ae**.  $R_f = 0.6$  (20% ethyl acetate – petroleum ether); Light yellow solid, m.p. 88 - 90 °C;  $^1\text{H}$  NMR (400 MHz, Chloroform- $d$ )  $\delta$  8.69 (s, 1H), 7.86 (s, 1H), 7.23 (s, 1H), 6.65 (s, 1H), 4.22 – 4.04 (m, 2H), 3.99 (s, 3H), 3.49 (d,  $J = 18.7$  Hz, 1H), 2.61 (d,  $J = 18.7$

Hz, 1H), 2.51 (s, 3H), 1.75 (s, 3H), 1.18 (t,  $J = 7.1$  Hz, 3H) ppm;  $^{13}\text{C}$  NMR (100 MHz, Chloroform- $d$ )  $\delta$  204.1, 174.5, 157.3, 151.2, 140.0, 138.5, 131.7, 124.0, 122.2, 119.7, 119.4, 106.6, 61.5, 55.6, 49.5, 48.4, 26.3, 22.5, 14.0 ppm; IR  $\nu_{\text{max}}$  2984, 1717, 1626, 1582, 1504, 1325, 1294, 1269, 1240, 1084  $\text{cm}^{-1}$ ; HRMS–EI ( $m/z$ ):  $[\text{M}]^+$  calculated for  $\text{C}_{19}\text{H}_{20}\text{O}_4$ , 312.1362, found, 312.1359.

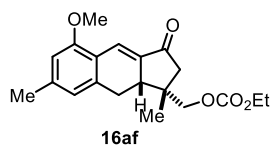

Compound **16af** (40 mg, 42% yield for two steps, mixture of two isomers, d.r. = 1.2:1) was prepared according to general procedure C from **9f** (55mg, 0.278 mmol, 1.0 equiv.) and aldehyde **6a** (68 mg, 0.417 mmol, 1.5 equiv.). The PEDA reaction time was 45

minutes under  $\lambda_{\text{max}} = 366$  nm UV light using anhydrous 1, 4-dioxane as solvent. One isomer:  $R_f = 0.6$  (20% ethyl acetate – petroleum ether), the other isomer:  $R_f = 0.56$  (20% ethyl acetate – petroleum ether); Light yellow viscous oil;  $^1\text{H}$  NMR (400 MHz, Chloroform- $d$ , mixture of two isomers)  $\delta$  7.63 (d,  $J = 3.2$  Hz, 1H), 7.57 (d,  $J = 3.2$  Hz, 1H), 6.54 (s, 2H), 6.48 (d,  $J = 3.7$  Hz, 2H), 4.18 – 4.03 (m, 6H), 3.97 (q,  $J = 9.6$  Hz, 2H), 3.74 (s, 6H), 2.97 (ddd,  $J = 15.2, 8.1, 3.1$  Hz, 1H), 2.84 (ddd,  $J = 17.2, 6.4, 3.2$  Hz, 1H), 2.78 – 2.61 (m, 4H), 2.50 (dd,  $J = 36.4, 17.7$  Hz, 2H), 2.25 (s, 6H), 2.18 (t,  $J = 18.4$  Hz, 2H), 1.29 – 1.15 (m, 9H), 0.99 (s, 3H) ppm;  $^{13}\text{C}$  NMR (100 MHz, Chloroform- $d$ , mixture of two isomers)  $\delta$  203.2, 203.1, 158.0 (2C), 155.2, 155.0, 141.9, 141.7, 137.6, 137.5, 136.2, 135.1, 125.6, 124.3, 121.8, 121.7, 119.3, 119.1, 110.3, 110.2, 73.6, 71.7, 64.2 (2C), 55.5 (2C), 50.5, 50.4, 45.6, 41.7, 40.0, 39.5, 29.4, 28.7, 23.1, 22.0 (2C), 19.8, 14.3 (2C) ppm; IR  $\nu_{\text{max}}$  2939, 1745, 1566, 1313, 1294, 1265, 1192, 1012, 790, 734  $\text{cm}^{-1}$ ; HRMS–EI ( $m/z$ ):  $[\text{M}]^+$  calculated for  $\text{C}_{20}\text{H}_{24}\text{O}_5$ , 344.1624, found, 344.1625.

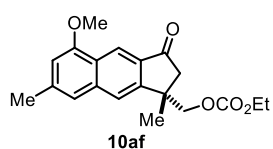

Compound **10af** (35 mg, 86% yield) was prepared according to general procedure D from the above obtained compound **16af**.  $R_f = 0.63$  (20% ethyl acetate – petroleum ether); Light yellow solid, m.p. 81 - 83  $^{\circ}\text{C}$ ;  $^1\text{H}$  NMR (400 MHz, Chloroform- $d$ )  $\delta$  8.69

(s, 1H), 7.76 (s, 1H), 7.23 (s, 1H), 6.64 (s, 1H), 4.27 (q,  $J = 11.7$  Hz, 2H), 4.13 (qd,  $J = 7.1, 0.8$  Hz, 2H), 3.99 (s, 3H), 2.89 (d,  $J = 18.8$  Hz, 1H), 2.58 (d,  $J = 18.8$  Hz, 1H), 2.51 (s, 3H), 1.54 (s, 3H), 1.25 (t,  $J = 7.1$  Hz, 3H) ppm;  $^{13}\text{C}$  NMR (100 MHz, Chloroform- $d$ )  $\delta$  204.4, 157.3, 155.1, 152.7, 139.9, 138.5, 132.6, 123.9, 121.6, 119.6, 119.3, 106.5, 74.2, 64.1, 55.6, 48.9, 41.9, 25.2, 22.5, 14.2 ppm; IR  $\nu_{\text{max}}$  2984, 1745, 1714, 1628, 1581, 1502, 1265, 1254, 1013, 895  $\text{cm}^{-1}$ ; HRMS–EI ( $m/z$ ):  $[\text{M}]^+$  calculated for  $\text{C}_{20}\text{H}_{22}\text{O}_5$ , 342.1467, found, 342.1472.

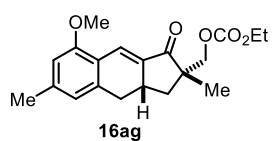

Compound **16ag** (41 mg, 62% yield for two steps, mixture of two isomers, d.r. = 1:1) was prepared according to general procedure C from **9g** (38 mg, 0.19 mmol, 1.0 equiv.) and aldehyde **6a** (46 mg, 0.285 mmol, 1.5 equiv.). The PEDA reaction time was 45

minutes under  $\lambda_{\text{max}} = 366$  nm UV light using anhydrous 1, 4-dioxane as solvent. One isomer:  $R_f = 0.58$ , (20% ethyl acetate – petroleum ether), the other isomer:  $R_f = 0.56$  (20% ethyl acetate – petroleum ether); Light

yellow solid, m.p. 62 - 64 °C; <sup>1</sup>H NMR (500 MHz, Chloroform-*d*, mixture of two isomers) δ 7.72 (d, *J* = 2.8 Hz, 2H), 6.60 (s, 2H), 6.56 (s, 2H), 4.33 (d, *J* = 10.7 Hz, 1H), 4.21 – 4.07 (m, 6H), 3.98 (d, *J* = 10.5 Hz, 1H), 3.81 (s, 6H), 3.09 – 2.86 (m, 4H), 2.66 – 2.44 (m, 3H), 2.33 (s, 6H), 2.10 (dd, *J* = 12.2, 7.1 Hz, 1H), 1.79 (t, *J* = 11.5 Hz, 1H), 1.45 (dd, *J* = 13.0, 10.6 Hz, 1H), 1.27 (dt, *J* = 11.7, 7.1 Hz, 6H), 1.21 (s, 3H), 1.08 (s, 3H) ppm; <sup>13</sup>C NMR (125 MHz, Chloroform-*d*, mixture of two isomers) δ 206.3, 205.5, 158.0, 157.9, 155.1, 155.0, 141.8 (2C), 138.51, 138.45, 136.5, 135.7, 126.3, 126.1, 121.39, 121.36, 119.6, 119.5, 110.08, 110.07, 71.6, 70.8, 64.1, 64.0, 55.46, 55.45, 50.4, 50.3, 39.2, 37.6, 36.1, 35.6, 32.3, 31.5, 22.0 (2C), 20.3, 19.8, 14.19, 14.15 ppm; IR  $\nu_{\max}$  2936, 1747, 1716, 1608, 1566, 1296, 1265, 1254, 1192, 1012 cm<sup>-1</sup>; HRMS–EI (*m/z*): [M]<sup>+</sup> calculated for C<sub>20</sub>H<sub>24</sub>O<sub>5</sub>, 344.1624, found, 344.1620.

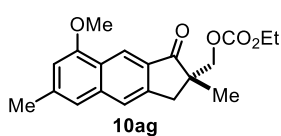

Compound **10ag** (27 mg, 67% yield) was prepared according to general procedure D from the above obtained compound **16ag**. *R<sub>f</sub>* = 0.56 (20% ethyl acetate – petroleum ether); Light yellow solid, m.p. 82 - 84 °C; <sup>1</sup>H NMR (400 MHz, Chloroform-*d*) δ 8.72

(s, 1H), 7.67 (s, 1H), 7.17 (s, 1H), 6.61 (s, 1H), 4.37 (d, *J* = 10.5 Hz, 1H), 4.24 (d, *J* = 10.5 Hz, 1H), 4.12 (q, *J* = 7.1 Hz, 2H), 3.98 (s, 3H), 3.46 (d, *J* = 17.1 Hz, 1H), 3.04 (d, *J* = 17.1 Hz, 1H), 2.50 (s, 3H), 1.28 (s, 3H), 1.22 (t, *J* = 7.1 Hz, 3H) ppm; <sup>13</sup>C NMR (100 MHz, Chloroform-*d*) δ 207.5, 157.3, 155.0, 145.9, 139.8, 138.9, 131.8, 123.7, 123.4, 120.4, 118.9, 106.1, 71.5, 64.1, 55.5, 49.7, 37.4, 22.6, 21.3, 14.1 ppm; IR  $\nu_{\max}$  2984, 1747, 1713, 1630, 1582, 1265, 1132, 1011, 791, 737 cm<sup>-1</sup>; HRMS–EI (*m/z*): [M]<sup>+</sup> calculated for C<sub>20</sub>H<sub>22</sub>O<sub>5</sub>, 342.1467, found, 342.1469.

## Experimental procedures and spectroscopic data of synthesis of the B-C-D-E skeleton of exiguaquinol

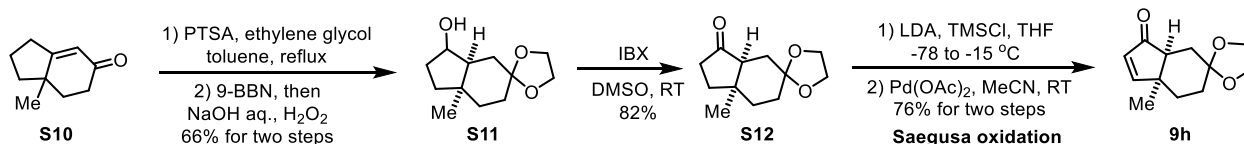

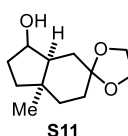
 To a stirred solution of compound **S10** <sup>[3]</sup> (9.90 g, 66.5 mmol, 1.0 equiv.) in 150 mL anhydrous toluene was added ethylene glycol (41.3 g, 33.8 mL, 665 mmol, 10.0 equiv.) and PTSA (1.27 g, 6.65 mmol, 0.1 equiv.) at room temperature. After stirring at 140 °C with a Dean-Stark trap for 4 hours, the mixture was quenched with saturated NaHCO<sub>3</sub> (30 mL) and extracted with ethyl acetate (3×50 mL). The combined organic layer was washed with water, brine, then dried over anhydrous sodium sulfate, concentrated, and purified by silica gel flash chromatography (2% to 5% ethyl acetate – petroleum ether) to obtain ketal compound as yellow oil (10.3 g, 79% yield). *R<sub>f</sub>* = 0.64 (10% ethyl acetate – petroleum ether), the NMR data are the same with the previous work <sup>[4]</sup>

To a stirred solution of above obtained compound (10.3 g, 53.0 mmol, 1.0 equiv.) in 10 mL anhydrous THF was added 9-BBN (212 mL, 106 mmol, 0.5 N in THF, 2.0 equiv.) at room temperature. The solution was stirred at room temperature for 16 hours and quenched with 10 mL methanol at 0 °C. Then 30 mL 3 N NaOH aqueous and 30 mL 30% H<sub>2</sub>O<sub>2</sub> were added to the mixture at 0 °C and the mixture was further stirred at room temperature for 7 hours. After that, the mixture was quenched with saturated Na<sub>2</sub>SO<sub>3</sub>/NaHCO<sub>3</sub> aqueous (60 mL, v/v = 1:1) and extracted with ethyl acetate (3×100 mL). The combined organic layer was washed with brine, then dried over anhydrous sodium sulfate, concentrated, and purified by silica gel flash chromatography (20% to 30% ethyl acetate – petroleum ether) to obtain compound **S11** as light yellow viscous oil (9.45 g, 84% yield). *R<sub>f</sub>* = 0.28 (20% ethyl acetate – petroleum ether), the NMR data of **S11** are the same with the previous work <sup>[4]</sup>.

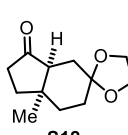
 To a stirred solution of compound **S11** (9.45 g, 44.5 mmol, 1.0 equiv.) in 100 mL anhydrous DMSO was added IBX (1.87 g, 66.8 mmol, 1.5 equiv.) at room temperature. After stirring at room temperature for 9 hours, the mixture was quenched with saturated Na<sub>2</sub>SO<sub>3</sub>/NaHCO<sub>3</sub> (60 mL, v/v = 1:1) and extracted with ethyl acetate (3×100 mL). The combined organic layer was washed with water, brine, then dried over anhydrous sodium sulfate, concentrated, and purified by silica gel flash chromatography (5% to 10% ethyl acetate – petroleum ether) to obtain compound **S12** as light yellow viscous oil (7.67 g, 82% yield). *R<sub>f</sub>* = 0.6 (20% ethyl acetate – petroleum ether), The NMR data of **S12** are the same with the previous work. <sup>[4]</sup>

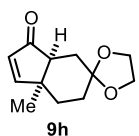

To a stirred solution of diisopropylamine (5.93 mL, 42.0 mmol, 2.1 equiv.) in 60 mL anhydrous THF at 0 °C was slowly added *n*-BuLi (16.0 mL, 40.0 mmol, 2.5 N in hexane, 2.0 equiv.). The solution was stirred at 0 °C for 30 minutes and then slowly added to the prepared cooled solution of compound **S12** (4.20 g, 20.0 mmol, 1.0 equiv.) in 20 mL anhydrous THF at -78 °C. After the mixture was stirred at -78 °C for 1.5 hours, triethylamine (11.1 mL, 80.0 mmol, 4.0 equiv.) and TMSCl (5.18 mL, 60.0 mmol, 3.0 equiv.) was added and stirred at -78 °C for 0.5 hour then further stirred at -15 °C for 3.0 hours. The mixture was quenched with saturated NaHCO<sub>3</sub> (100 mL) and extracted with ethyl acetate (3×100 mL). The combined organic layer was washed with water, brine, then dried over anhydrous sodium sulfate, concentrated to obtain silyl enol ether crude product. The crude product (5.60 g, 19.85 mmol, 1.0 equiv.) was dissolved with 80 mL anhydrous MeCN and then added Palladium (II) Acetate (900 mg, 3.97 mmol, 0.2 equiv.). The mixture was stirred at room temperature under oxygen balloon for 8 hours. The mixture was filtered through silica gel and washed with ethyl acetate (6×50 mL). The combined organic layer was concentrated, and purified by silica gel flash chromatography (10% to 30% ethyl acetate – petroleum ether) to obtain compound **9h** as light yellow solid (3.16 g, 76% yield). *R<sub>f</sub>* = 0.24 (30% ethyl acetate – petroleum ether); light yellow solid, m.p. 73 - 75 °C; <sup>1</sup>H NMR (400 MHz, Chloroform-*d*) δ 7.40 (d, *J* = 5.7 Hz, 1H), 6.06 (d, *J* = 5.7 Hz, 1H), 4.00 – 3.80 (m, 4H), 2.22 – 2.09 (m, 2H), 1.86 – 1.74 (m, 2H), 1.73 – 1.65 (m, 1H), 1.64 – 1.51 (m, 2H), 1.27 (s, 3H) ppm; <sup>13</sup>C NMR (100 MHz, Chloroform-*d*) δ 210.1, 171.1, 130.5, 108.3, 64.2, 64.0, 52.0, 43.3, 32.6, 31.1, 30.8, 25.4 ppm; IR  $\nu_{\text{max}}$  2957, 2887, 1708, 1660, 1587, 1427, 1230, 1282, 1138, 1028 cm<sup>-1</sup>; HRMS–EI (*m/z*): [M]<sup>+</sup> calculated for C<sub>12</sub>H<sub>16</sub>O<sub>3</sub>, 208.1099 found, 208.1096.

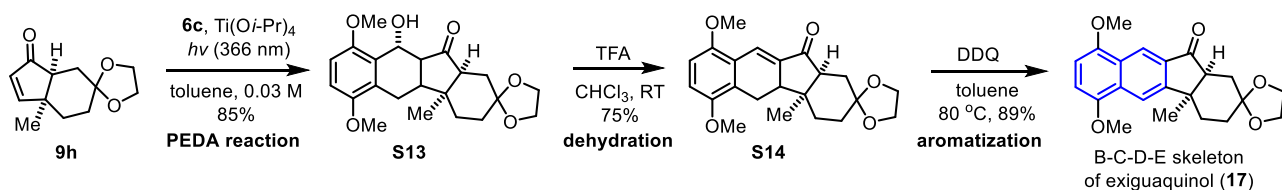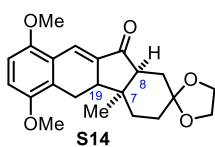

To a solution of compound **9h** (986 mg, 4.74 mmol, 1.0 equiv.) and aromatic aldehyde **6c** (1.28 g, 7.11 mmol, 1.5 equiv.) in anhydrous and degassed toluene (158 mL, 0.03 M) was added titanium(IV) isopropoxide (2.0 equiv.) under N<sub>2</sub>. After homogeneous mixing, the solution was divided into 4 quartz tubes (4×40 mL) and photolyzed at room temperature in a Rayonet chamber reactor (16 lamps) at 366 nm for 45 minutes. Then saturated NaHCO<sub>3</sub> was added and stirred for 5 minutes. The mixture was filtered through silica gel and washed with ethyl acetate (6×50 mL). The organic layer was separated and washed with brine (50 mL). The combined organic layer was dried over anhydrous sodium sulfate, concentrated and purified by silica gel flash chromatography (20% to 30% ethyl acetate – petroleum ether) to obtain compound **S13** (1.56 g, 85% yield). Then this obtained compound **S13** was dissolved in AR



grade chloroform (100 mL) and added TFA (0.45 mL, 6.0 mmol, 1.5 equiv.) at room temperature. After stirring at room temperature for 3.5 hours, the mixture was quenched with saturated NaHCO<sub>3</sub> (20 mL) at 0 °C and extracted with ethyl acetate (3×50 mL). The combined organic layers were dried over anhydrous sodium sulfate, concentrated, and purified by silica gel flash chromatography to obtain the corresponding product **S14** (1.11 g, 75% yield) as yellow viscous oil. *R<sub>f</sub>* = 0.38 (20% ethyl acetate – petroleum ether); Yellow viscous oil; <sup>1</sup>H NMR (400 MHz, Chloroform-*d*) δ 7.75 (d, *J* = 2.7 Hz, 1H), 6.85 (d, *J* = 8.9 Hz, 1H), 6.69 (d, *J* = 8.9 Hz, 1H), 3.95 (t, *J* = 16.0 Hz, 4H), 3.82 (s, 3H), 3.80 (s, 3H), 3.21 – 3.07 (m, 2H), 2.47 – 2.27 (m, 2H), 1.96 – 1.69 (m, 4H), 1.68 – 1.60 (m, 1H), 1.38 (t, *J* = 13.5 Hz, 1H), 0.99 (s, 3H) ppm; <sup>13</sup>C NMR (100 MHz, Chloroform-*d*) δ 206.6, 152.3, 150.7, 136.7, 126.2, 125.6, 123.1, 113.4, 109.2, 108.0, 64.4, 64.3, 56.9 (C8), 56.0 (2C), 36.7 (C7+C19, 2C), 32.4, 30.8, 30.7, 25.9, 20.5 ppm; IR *v*<sub>max</sub> 2936, 1747, 1716, 1608, 1566, 1296, 1265, 1254, 1192, 1012 cm<sup>-1</sup>; HRMS–EI (*m/z*): [M]<sup>+</sup> calculated for C<sub>22</sub>H<sub>26</sub>O<sub>5</sub>, 370.1780, found, 370.1786.

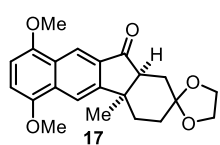

To a stirred solution of above obtained **S14** (1.11 g, 3.0 mmol, 1.0 equiv.) in anhydrous toluene (50 mL) was added DDQ (1.36 g, 6.0 mmol, 2.0 equiv.) at room temperature. After stirring at 80 °C for 1.5 hours, the mixture was quenched with saturated Na<sub>2</sub>SO<sub>3</sub>/NaHCO<sub>3</sub> (20 mL v/v = 1:1) and extracted with ethyl acetate (3×30 mL). The combined organic layers were washed with saturated Na<sub>2</sub>SO<sub>3</sub>/NaHCO<sub>3</sub> (20 mL, v/v = 1:1), brine, then dried over anhydrous sodium sulfate, concentrated, and purified by silica gel flash chromatography (20% ethyl acetate – petroleum ether) to obtain compound **17** as a yellow viscous oil (982 mg, 89% yield). *R<sub>f</sub>* = 0.38 (20% ethyl acetate – petroleum ether); Yellow viscous oil; <sup>1</sup>H NMR (500 MHz, Chloroform-*d*) δ 8.72 (s, 1H), 8.23 (s, 1H), 6.81 (d, *J* = 8.3 Hz, 1H), 6.68 (d, *J* = 8.3 Hz, 1H), 4.06 – 3.99 (m, 2H), 3.99 (s, 3H), 3.96 (s, 3H), 3.94 – 3.83 (m, 2H), 2.64 (dd, *J* = 7.2, 3.8 Hz, 1H), 2.38 (ddd, *J* = 14.2, 3.9, 1.9 Hz, 1H), 1.95 – 1.89 (m, 2H), 1.88 – 1.80 (m, 2H), 1.61 (s, 3H), 1.57 – 1.51 (m, 1H) ppm; <sup>13</sup>C NMR (125 MHz, Chloroform-*d*) δ 205.8, 155.6, 151.4, 149.1, 132.0, 130.0, 125.8, 119.8, 115.3, 108.0, 106.0, 103.0, 64.4, 63.9, 56.5, 55.81, 55.77, 40.6, 36.2, 31.6, 30.1, 25.8 ppm; IR *v*<sub>max</sub> 2984, 1747, 1713, 1630, 1582, 1265, 1132, 1011, 791, 737 cm<sup>-1</sup>; HRMS–EI (*m/z*): [M]<sup>+</sup> calculated for C<sub>22</sub>H<sub>24</sub>O<sub>5</sub>, 368.1624, found, 368.1626.

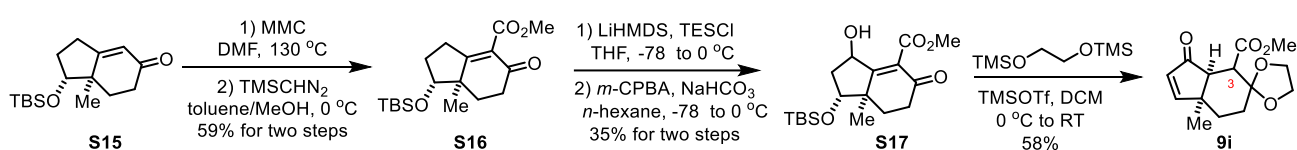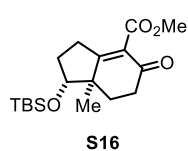

To a stirred solution of compound **S15** <sup>[5]</sup> (8.40 g, 30.0 mmol, 1.0 equiv.) in 90 mL anhydrous DMF was added magnesium methyl carbonate (45.0 mL, 90.0 mmol, 2 N in DMF, 3.0 equiv.) at room temperature. After stirring at 130 °C for 4 hours, DMF was evacuated and then diluted with 100 mL diethyl ether. The mixture was cooled to 0 °C and its pH value was adjusted to 2~3 with 2 N

HCl. Separated the organic layer and extracted aqueous layer with diethyl ether (3×50 mL). The combined organic layer was washed with brine, dried over anhydrous sodium sulfate, concentrated to obtain the corresponding crude carboxylic acid product. Then the crude product was dissolved in anhydrous toluene/MeOH (150 mL, v:v = 4:1) and added (trimethylsilyl)diazomethane (30.0 mL, 60.0 mmol, 2 N in hexane, 2.0 equiv.) at 0 °C. After stirring at 0 °C for 30 minutes, the mixture was evacuated and purified by silica gel flash chromatography (5% to 20% ethyl acetate – petroleum ether) to obtain compound **S16** as light yellow solid (5.98 g, 59% yield for two steps).  $R_f = 0.2$  (10% ethyl acetate – petroleum ether), the NMR data of the compound **S16** are the same with the previous work [6].

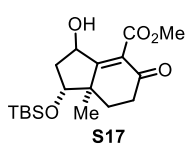

To a stirred solution of compound **S16** (3.38 g, 10.0 mmol, 1.0 equiv.) in 60 mL anhydrous THF was added LiHMDS (20.0 mL, 20.0 mmol, 1 N in THF, 2.0 equiv.) at -78 °C. TESCl (3.02 g, 3.36 mL, 20.0 mmol, 2.0 equiv.) was added and further stirred at 0 °C for 3 hours.

The mixture was quenched with saturated NaHCO<sub>3</sub> (20 mL) and extracted with ethyl acetate (3×50 mL). The combined organic layer was washed with water, brine, dried over anhydrous sodium sulfate, concentrated to obtain crude silyl enol ether crude product as yellow viscous oil. Then the crude product was dissolved in anhydrous *n*-hexane (100 mL) and added solid NaHCO<sub>3</sub> (8.40 g, 100 mmol, 10.0 equiv.) then *m*-CPBA (4.06 g, 20 mmol, 85%, 2.0 equiv.) at -78 °C. After stirring at -78 °C for 30 minutes, the mixture was further stirred at 0 °C for 60 minutes. After that, the mixture was quenched with saturated Na<sub>2</sub>SO<sub>3</sub>/NaHCO<sub>3</sub> (60 mL, v/v = 1:1) and extracted with ethyl acetate (3×100 mL). The combined organic layer was washed with saturated NaHCO<sub>3</sub>, brine, then dried over anhydrous sodium sulfate, concentrated, and purified by silica gel flash chromatography (20% to 30% ethyl acetate – petroleum ether) to obtain compound **S17** as light yellow solid (1.24 g, 35% yield).  $R_f = 0.36$  (30% ethyl acetate – petroleum ether); Light yellow solid, m.p. 135 - 137 °C; <sup>1</sup>H NMR (500 MHz, Chloroform-*d*) δ 4.86 (dd,  $J = 6.7, 2.4$  Hz, 1H), 4.14 (t,  $J = 9.0$  Hz, 1H), 3.83 (s, 3H), 2.68 – 2.57 (m, 1H), 2.51 (dd,  $J = 18.1, 5.4$  Hz, 1H), 2.15 – 1.99 (m, 3H), 1.89 (td,  $J = 13.5, 5.5$  Hz, 1H), 1.12 (s, 3H), 0.89 (s, 9H), 0.06 (s, 3H), 0.05 (s, 3H) ppm; <sup>13</sup>C NMR (125 MHz, Chloroform-*d*) δ 194.9, 178.8, 167.4, 128.5, 78.3, 68.5, 52.6, 46.6, 39.7, 33.8, 33.5, 25.7 (3C), 17.9, 17.0, -4.6, -5.0 ppm; IR  $\nu_{max}$  3726, 1705, 1649, 1485, 1390, 1142, 1076, 1005 cm<sup>-1</sup>; HRMS–EI ( $m/z$ ): [M]<sup>+</sup> calculated for C<sub>18</sub>H<sub>30</sub>O<sub>5</sub>Si, 354.1863 found, 354.1873.

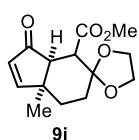

To a stirred solution of compound **S17** (1.24 g, 3.50 mmol, 1.0 equiv.) in 50 mL anhydrous DCM was added 1,2-bis(trimethylsilyloxy)ethane (2.58 mL, 10.5 mmol, 3.0 equiv.) and TMSOTf (0.63 mL, 3.50 mmol, 1.0 equiv.) at 0 °C. After stirring at room temperature for 6 hours, the mixture was quenched with saturated NaHCO<sub>3</sub> (20 mL) and extracted with ethyl acetate (3×50 mL). The combined

organic layer was washed with brine, dried over anhydrous sodium sulfate, concentrated, and purified by silica gel flash chromatography (20% to 30% ethyl acetate – petroleum ether) to obtain compound **9i** as light yellow solid (540 mg, 58% yield).  $R_f = 0.42$  (30% ethyl acetate – petroleum ether); Light yellow solid, m.p. 85 - 87 °C;  $^1\text{H NMR}$  (400 MHz, Chloroform-*d*)  $\delta$  7.45 (d,  $J = 5.7$  Hz, 1H), 6.04 (d,  $J = 5.7$  Hz, 1H), 4.12 – 3.99 (m, 1H), 3.96 – 3.85 (m, 3H), 3.71 (s, 3H), 3.44 (d,  $J = 1.2$  Hz, 1H), 2.39 (d,  $J = 2.6$  Hz, 1H), 2.25 (ddd,  $J = 13.5$ , 12.3, 4.1 Hz, 1H), 1.84 (dt,  $J = 13.8$ , 4.7 Hz, 1H), 1.65 (td,  $J = 13.7$ , 13.0, 4.2 Hz, 1H), 1.48 (t,  $J = 5.4$  Hz, 1H), 1.45 (s, 3H) ppm;  $^{13}\text{C NMR}$  (100 MHz, Chloroform-*d*)  $\delta$  207.4, 172.7, 172.3, 128.7, 107.8, 65.0, 63.9, 55.0, 51.9, 46.8, 42.8, 33.0, 28.9, 25.9 ppm; IR  $\nu_{\text{max}}$  2889, 1735, 1709, 1649, 1589, 1390, 1344, 1143, 1026, 949  $\text{cm}^{-1}$ ; HRMS–EI ( $m/z$ ):  $[\text{M}]^+$  calculated for  $\text{C}_{14}\text{H}_{18}\text{O}_5$ , 266.1154 found, 266.1157

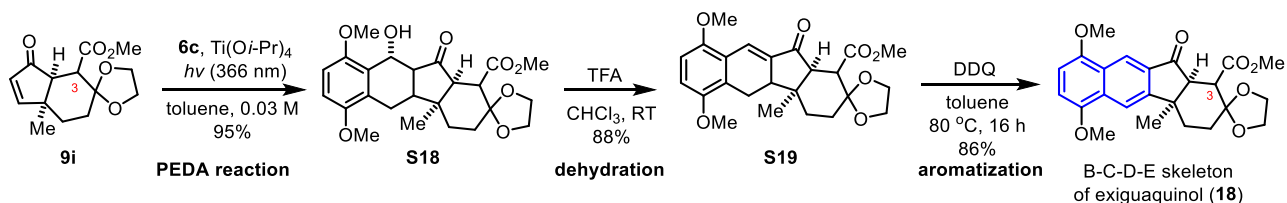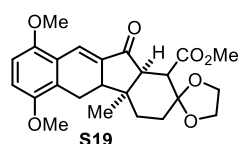

Compound **S19** (923 mg, 84% yield for two steps) was prepared according to above similar procedure from **9i** (689 mg, 2.59 mmol, 1.0 equiv.) and aldehyde **6c** (994 mg, 3.88 mmol, 1.5 equiv.). The PEDAs reaction time was 2 hours under  $\lambda_{\text{max}} = 366$  nm UV light

using anhydrous toluene as solvent.  $R_f = 0.48$  (40% ethyl acetate – petroleum ether); Yellow solid, m.p. 236 – 238 °C;  $^1\text{H NMR}$  (400 MHz, Chloroform-*d*)  $\delta$  7.76 (d,  $J = 3.2$  Hz, 1H), 6.85 (d,  $J = 9.0$  Hz, 1H), 6.69 (d,  $J = 9.0$  Hz, 1H), 4.05 – 3.83 (m, 4H), 3.81 (s, 3H), 3.79 (s, 3H), 3.71 (s, 3H), 3.16 (dd,  $J = 15.5$ , 7.3 Hz, 1H), 3.06 (ddd,  $J = 16.0$ , 7.3, 3.1 Hz, 1H), 2.81 (d,  $J = 13.0$  Hz, 1H), 2.61 (d,  $J = 13.0$  Hz, 1H), 2.38 (t,  $J = 15.8$  Hz, 1H), 1.96 – 1.81 (m, 2H), 1.66 (dt,  $J = 7.7$ , 3.7 Hz, 2H), 1.04 (s, 3H) ppm;  $^{13}\text{C NMR}$  (100 MHz, Chloroform-*d*)  $\delta$  204.0, 170.7, 152.4, 150.7, 135.9, 126.9, 125.5, 123.1, 113.6, 109.2, 108.6, 65.3, 64.9, 58.9, 56.03, 56.02, 52.01, 48.5, 37.3, 37.1, 31.7, 30.5, 25.8, 20.5 ppm; IR  $\nu_{\text{max}}$  2954, 2922, 1743, 1707, 1635, 1595, 1301, 1222, 1165, 1057  $\text{cm}^{-1}$ ; HRMS–ESI ( $m/z$ ):  $[\text{M}+\text{H}]^+$  calculated for  $\text{C}_{24}\text{H}_{28}\text{O}_7$ , 428.1835, found, 428.1831.

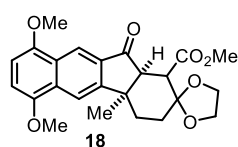

Compound **18** (798 mg, 86% yield) was prepared according to above similar procedure from the above obtained compound **S19**.  $R_f = 0.78$  (40% ethyl acetate – petroleum ether);

Yellow solid, m.p. 173 – 175 °C;  $^1\text{H NMR}$  (400 MHz, Chloroform-*d*)  $\delta$  8.72 (s, 1H), 8.24 (s, 1H), 6.80 (d,  $J = 8.4$  Hz, 1H), 6.67 (d,  $J = 8.4$  Hz, 1H), 4.15 – 4.06 (m, 1H), 3.98 (s, 3H), 3.96 (d,  $J = 2.2$  Hz, 1H), 3.95 (s, 3H), 3.92 (d,  $J = 6.4$  Hz, 1H), 3.91 – 3.83 (m, 1H), 3.75 (s, 3H), 3.60 (dd,  $J = 2.9$ , 1.4 Hz, 1H), 2.87 (dd,  $J = 2.8$ , 0.8 Hz, 1H), 2.42 (td,  $J = 13.2$ , 4.0 Hz, 1H), 2.01 (dt,  $J = 14.0$ , 4.5 Hz, 1H), 1.84 (td,  $J = 12.4$ , 4.0 Hz, 1H), 1.76 (s, 3H), 1.52 – 1.44 (m, 1H) ppm;  $^{13}\text{C NMR}$  (100 MHz, Chloroform-*d*)  $\delta$  203.4, 172.7, 155.9, 151.4, 149.1, 130.8, 130.2, 125.8, 120.0, 115.3, 107.7, 106.1, 103.1, 65.1, 63.7, 58.6, 55.78,

55.75, 52.0, 46.3, 40.4, 36.4, 29.4, 26.5 ppm; IR  $\nu_{\max}$  3007, 2891, 1736, 1716, 1629, 1606, 1338, 1145, 1076, 1022  $\text{cm}^{-1}$ ; HRMS–EI ( $m/z$ ):  $[\text{M}]^+$  calculated for  $\text{C}_{24}\text{H}_{26}\text{O}_7$ , 426.1679 found, 426.1673.

## References

- [1]. W. C. Still, M. Kahn and A. Mitra, Rapid chromatographic technique for preparative separations with moderate resolution, *J. Org. Chem.*, 1978, **43**, 2923-2925.
- [2]. H. Liu, L. Huo, B. Yang, Y. Yuan, W. Zhang, Z. Xu, S. Qiu and H. Tan, Biomimetic-Inspired Syntheses of Myrtucommuacetalone and Myrtucommulone J, *Org. Lett.*, 2017, **19**, 4786-4789.
- [3]. H. S. P. Rao and K. S. Reddy, A superior method for the synthesis of 7a-methyl-2,3,7,7a-tetrahydrinden-5(6H)-one, *Org. Prep. Proced. Int.*, 1994, **26**, 491-494.
- [4]. B. Defaut, T. B. Parsons, N. Spencer, L. Male, B. M. Kariuki and R. S. Grainger, Synthesis of the trans-hydrindane core of dictyoxetane, *Org. Biomol. Chem.*, 2012, **10**, 4926-4932.
- [5]. (a) R. C. A. Isaacs, M. J. Di Grandi and S. J. Danishefsky, Synthesis of an enantiomerically pure intermediate containing the CD substructure of taxol, *J. Org. Chem.*, 1993, **58**, 3938-3941. (b) J. L. Frie, C. S. Jeffrey and E. J. Sorensen, A Hypervalent Iodine-Induced Double Annulation Enables a Concise Synthesis of the Pentacyclic Core Structure of the Cortistatins, *Org. Lett.*, 2009, **11**, 5394-5397.
- [6]. Y. Guo, T. Quan, Y. Lu and T. Luo, Enantioselective Total Synthesis of (+)-Wortmannin, *J. Am. Chem. Soc.*, 2017, **139**, 6815-6818.

# $^1\text{H}$ and $^{13}\text{C}$ NMR spectra of the synthetic intermediates and products

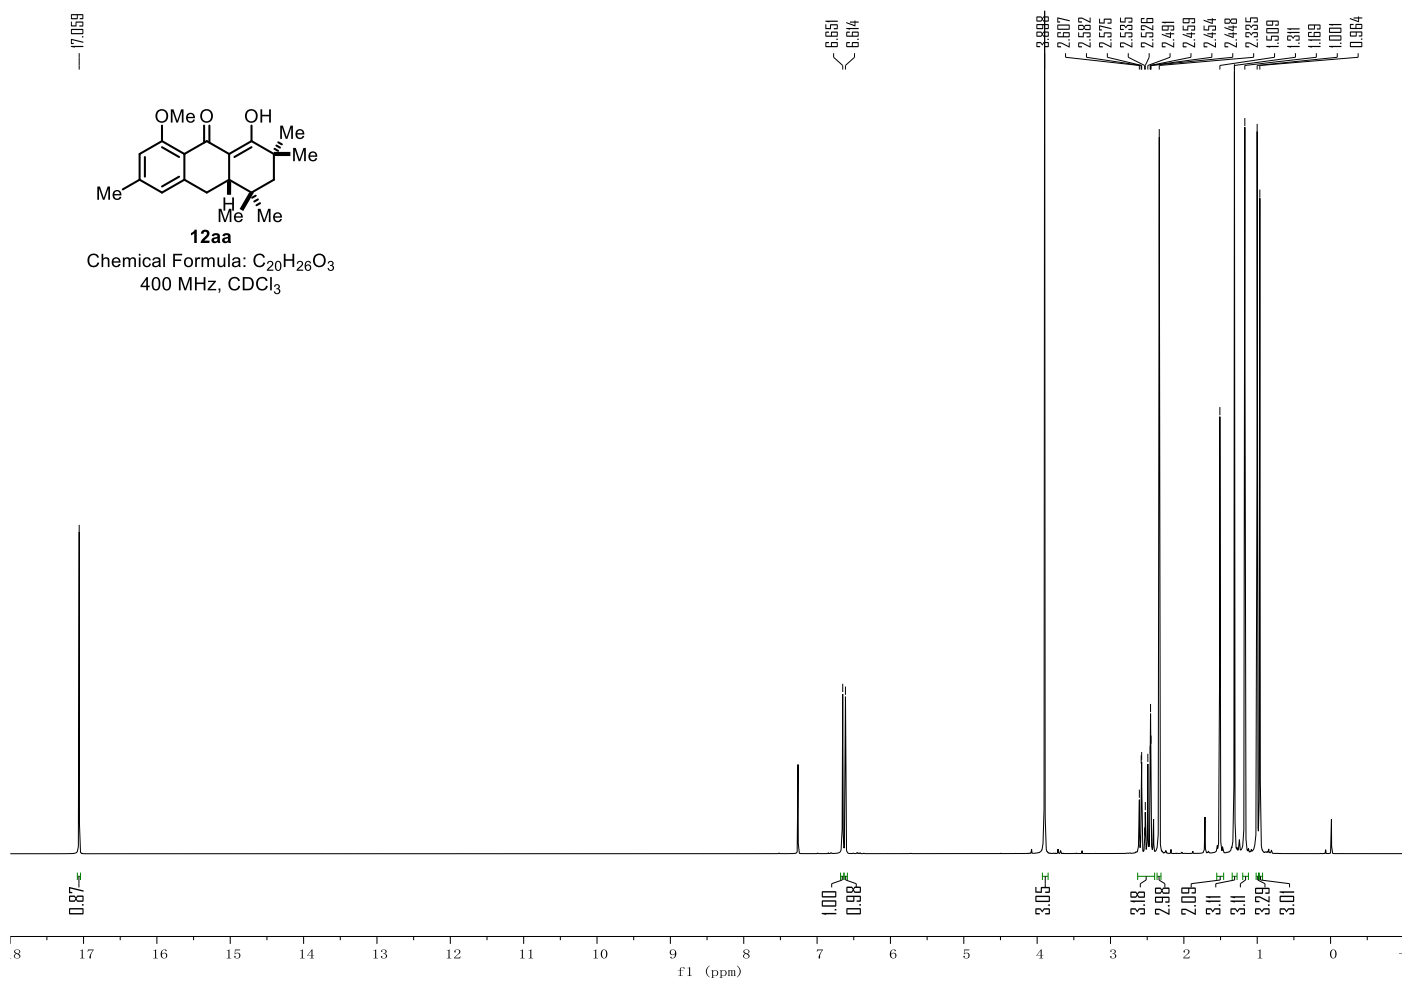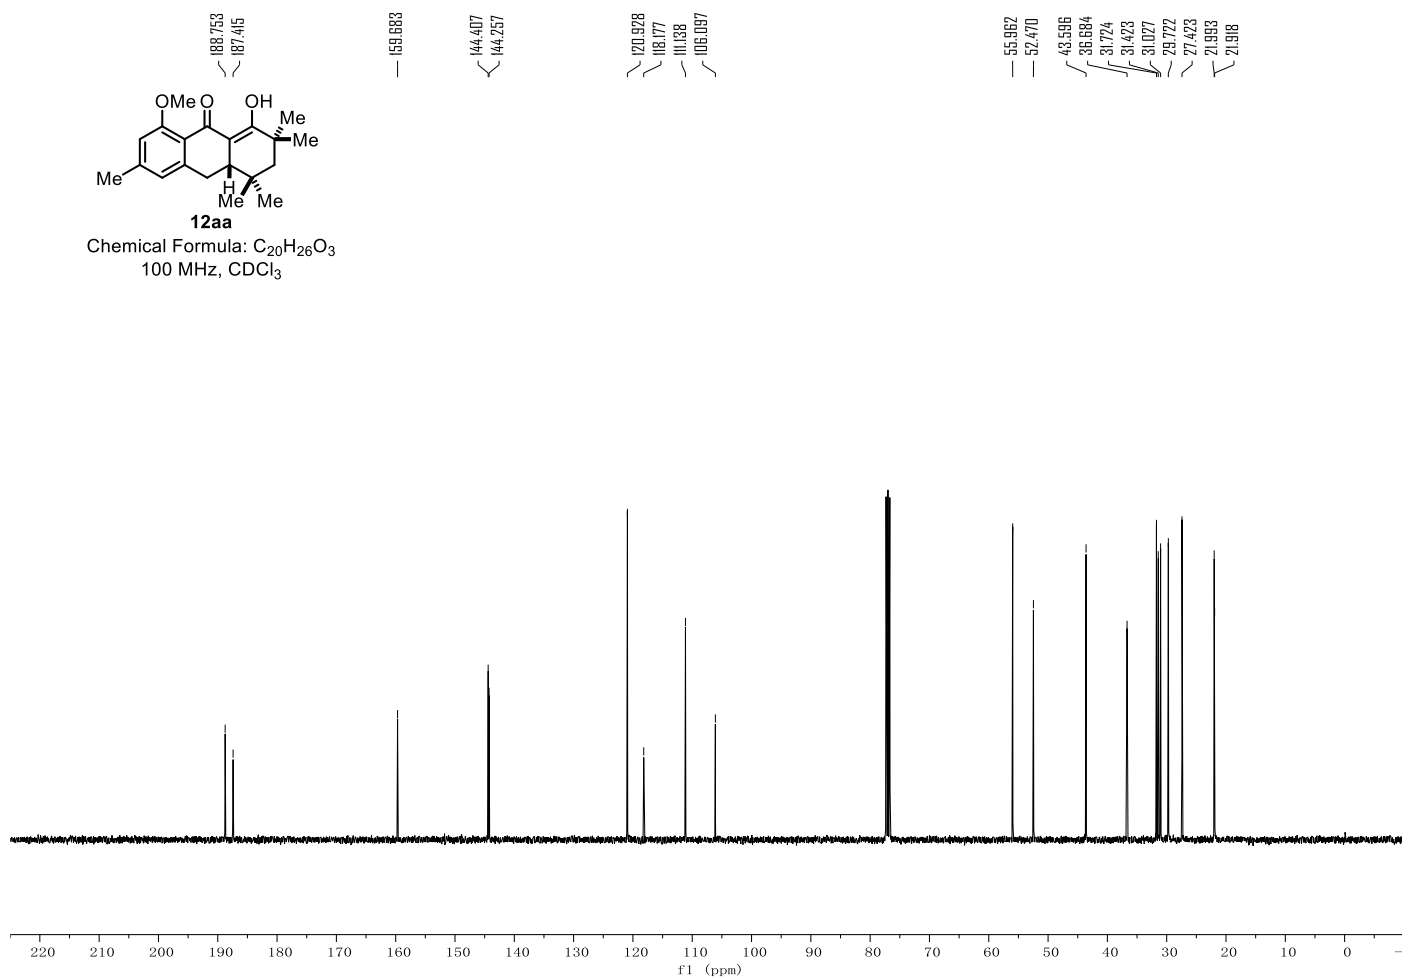

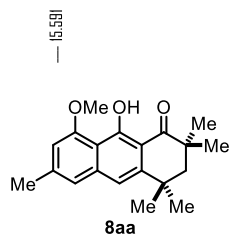

Chemical Formula: C<sub>20</sub>H<sub>24</sub>O<sub>3</sub>  
400 MHz, CDCl<sub>3</sub>

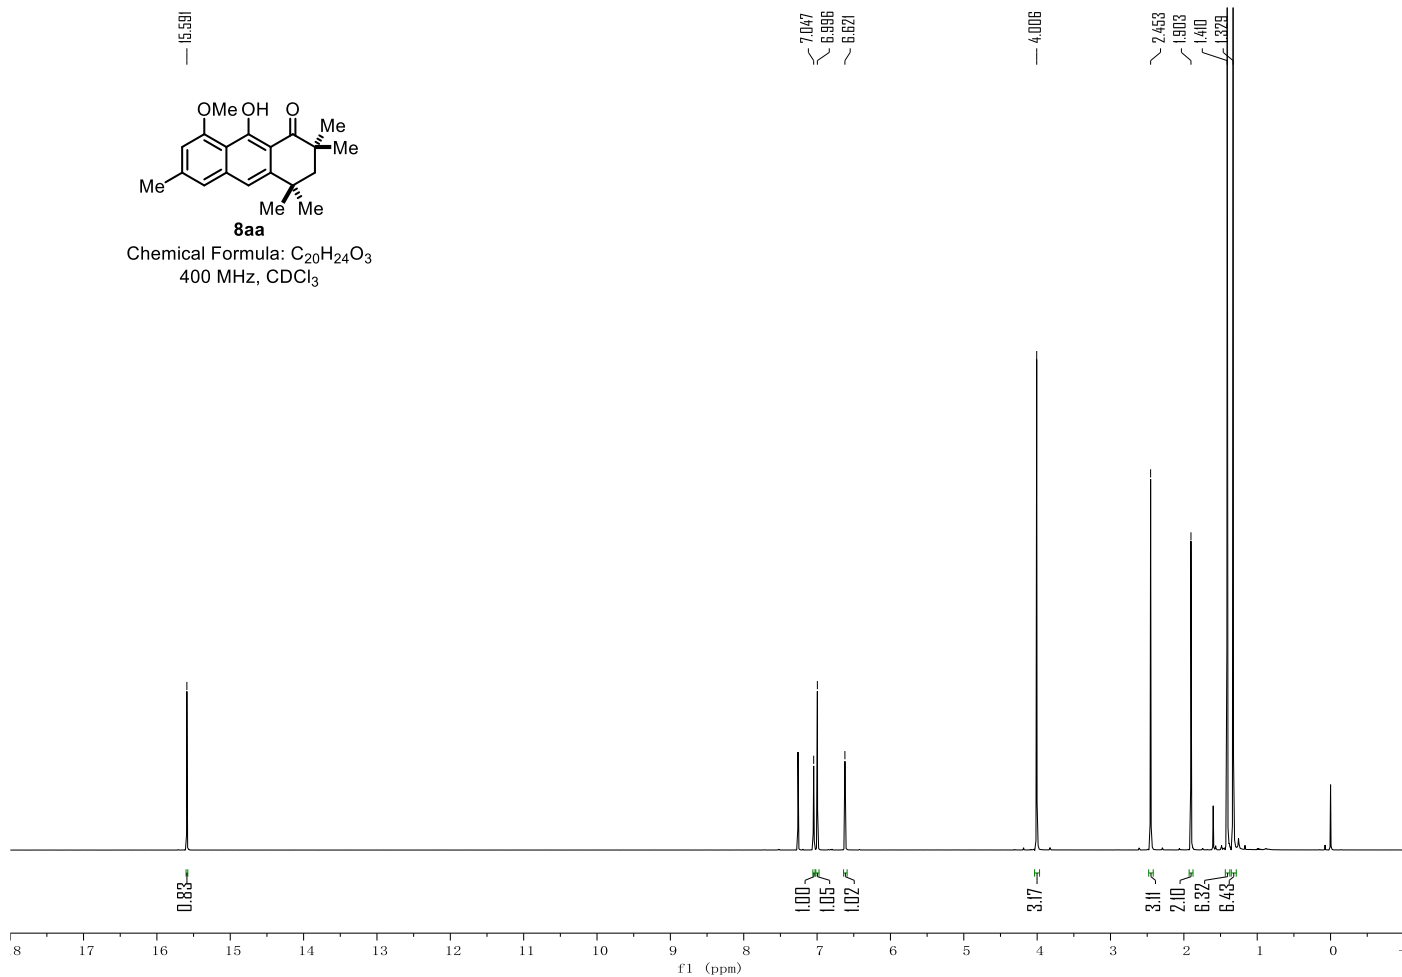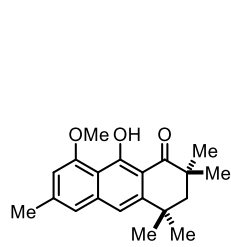

Chemical Formula: C<sub>20</sub>H<sub>24</sub>O<sub>3</sub>  
100 MHz, CDCl<sub>3</sub>

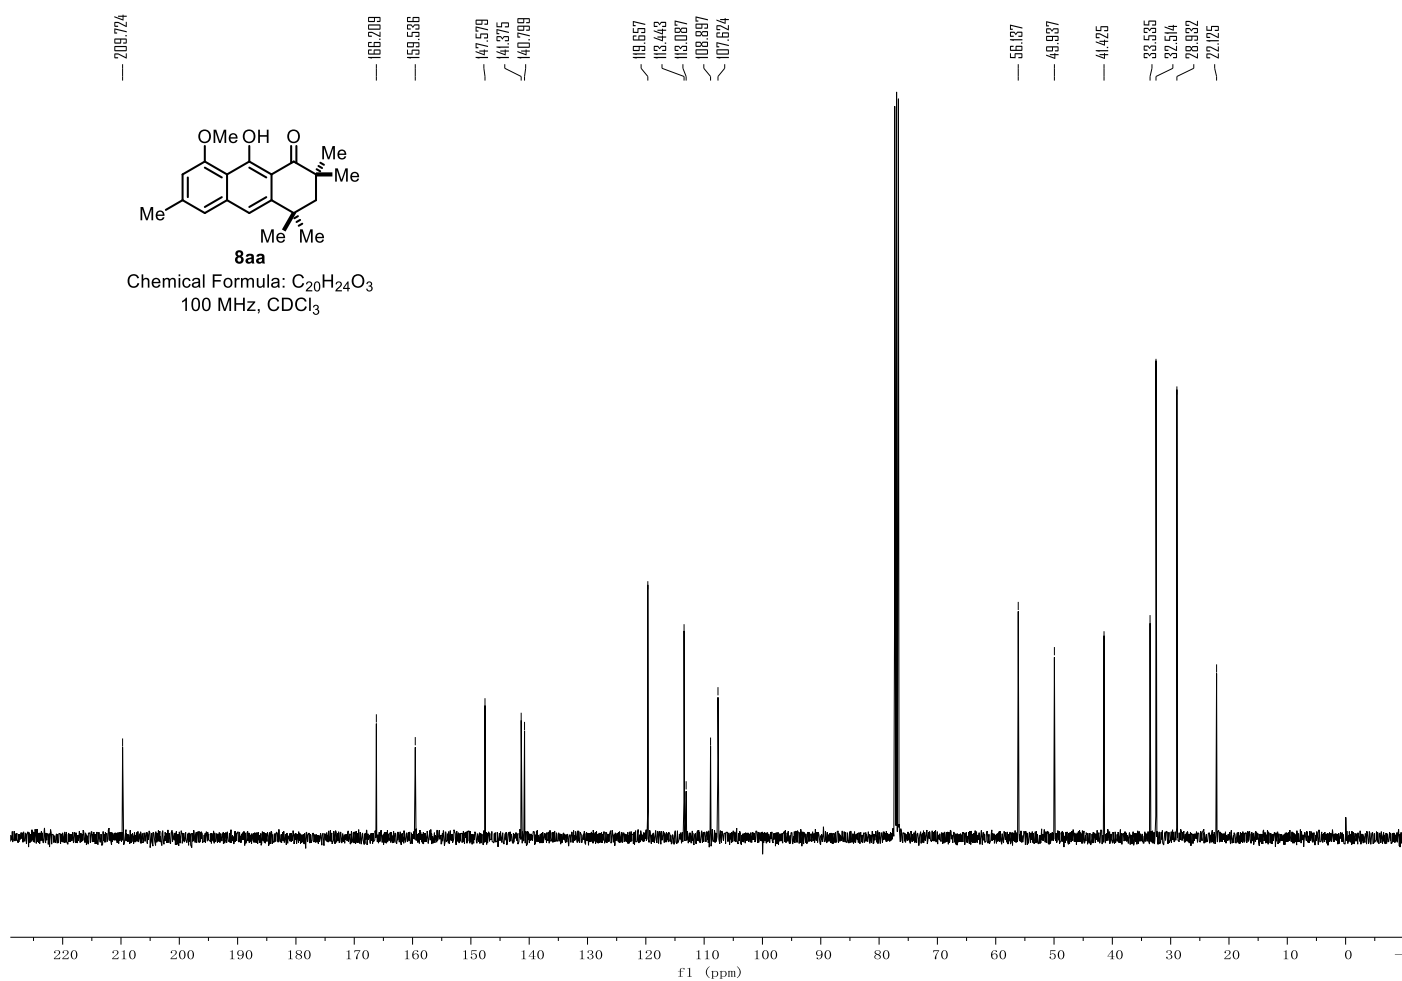

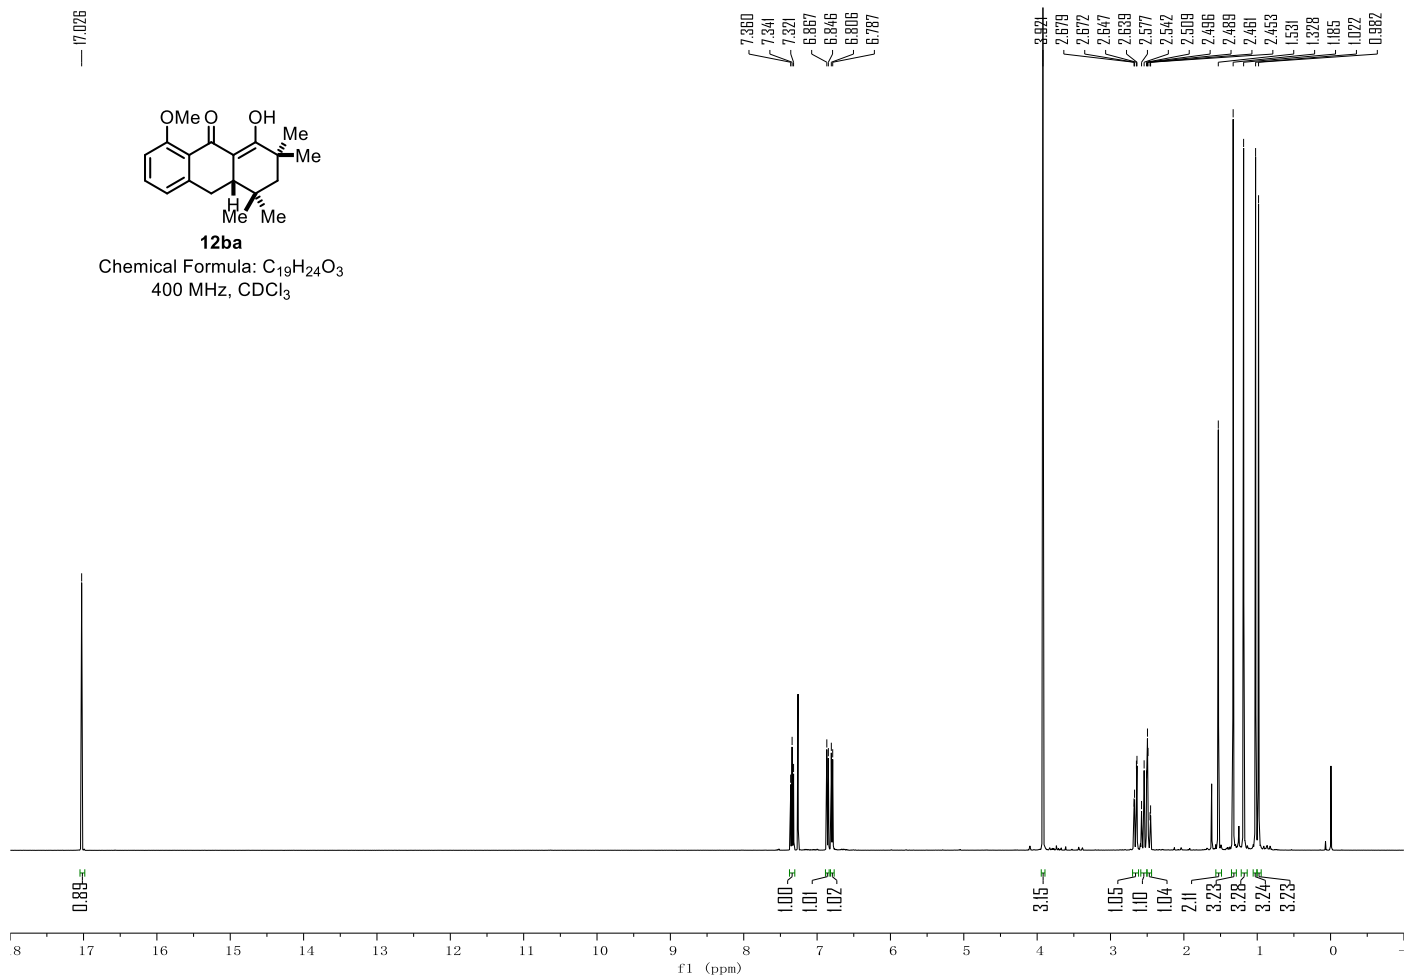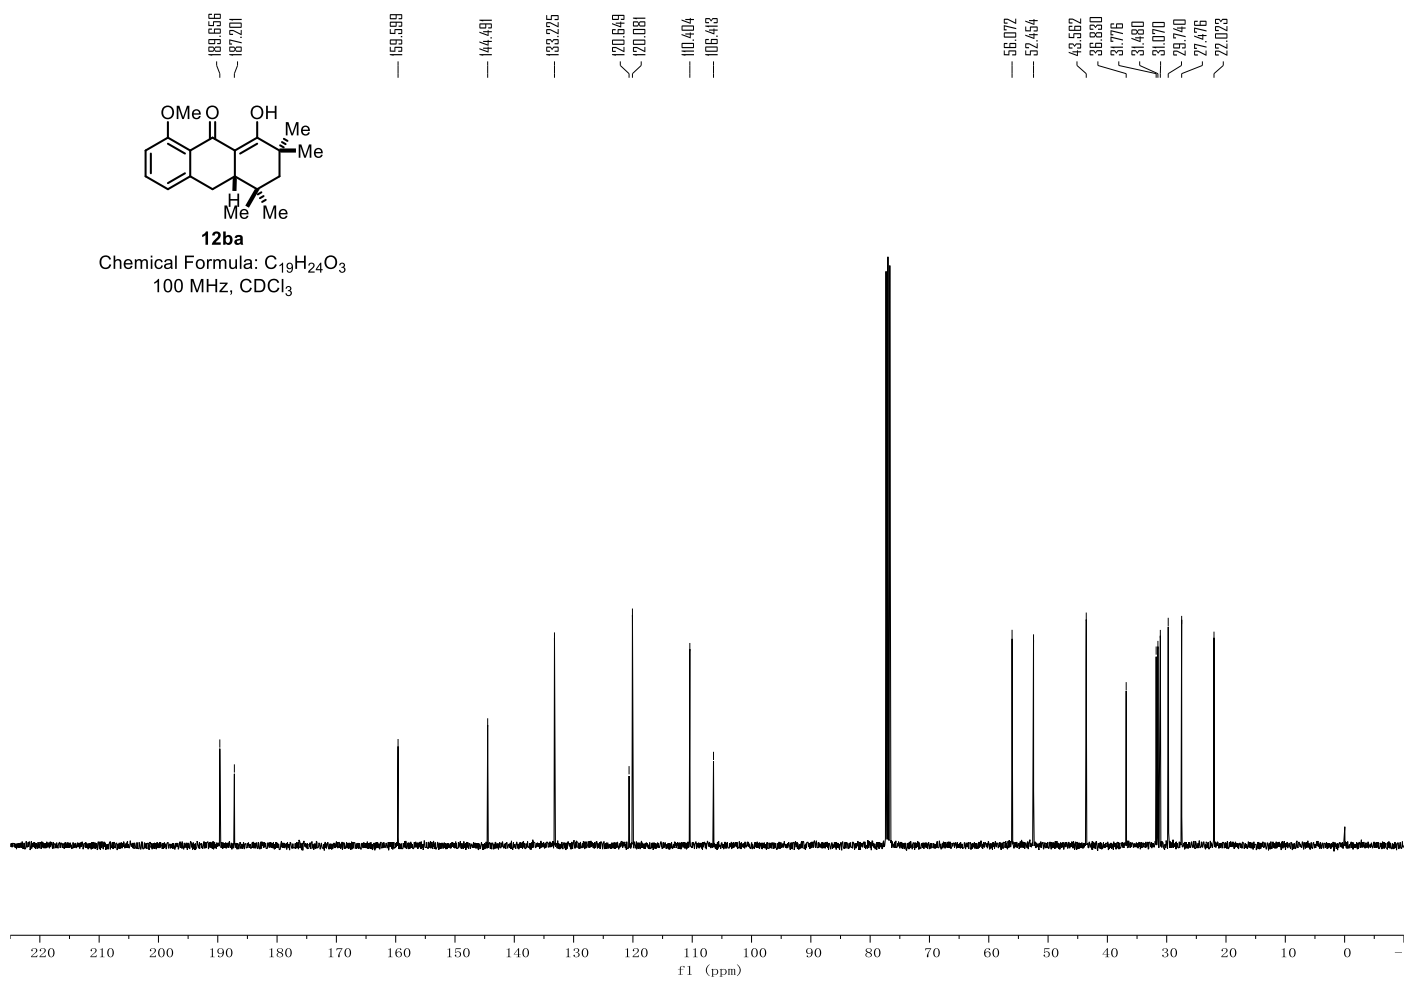

15.548

7.488  
7.468  
7.448  
7.260  
7.236  
7.090  
6.807  
6.787

4.020

1.917  
1.424  
1.326

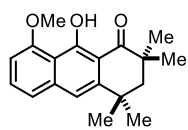

**8ba**

Chemical Formula: C<sub>19</sub>H<sub>22</sub>O<sub>3</sub>  
400 MHz, CDCl<sub>3</sub>

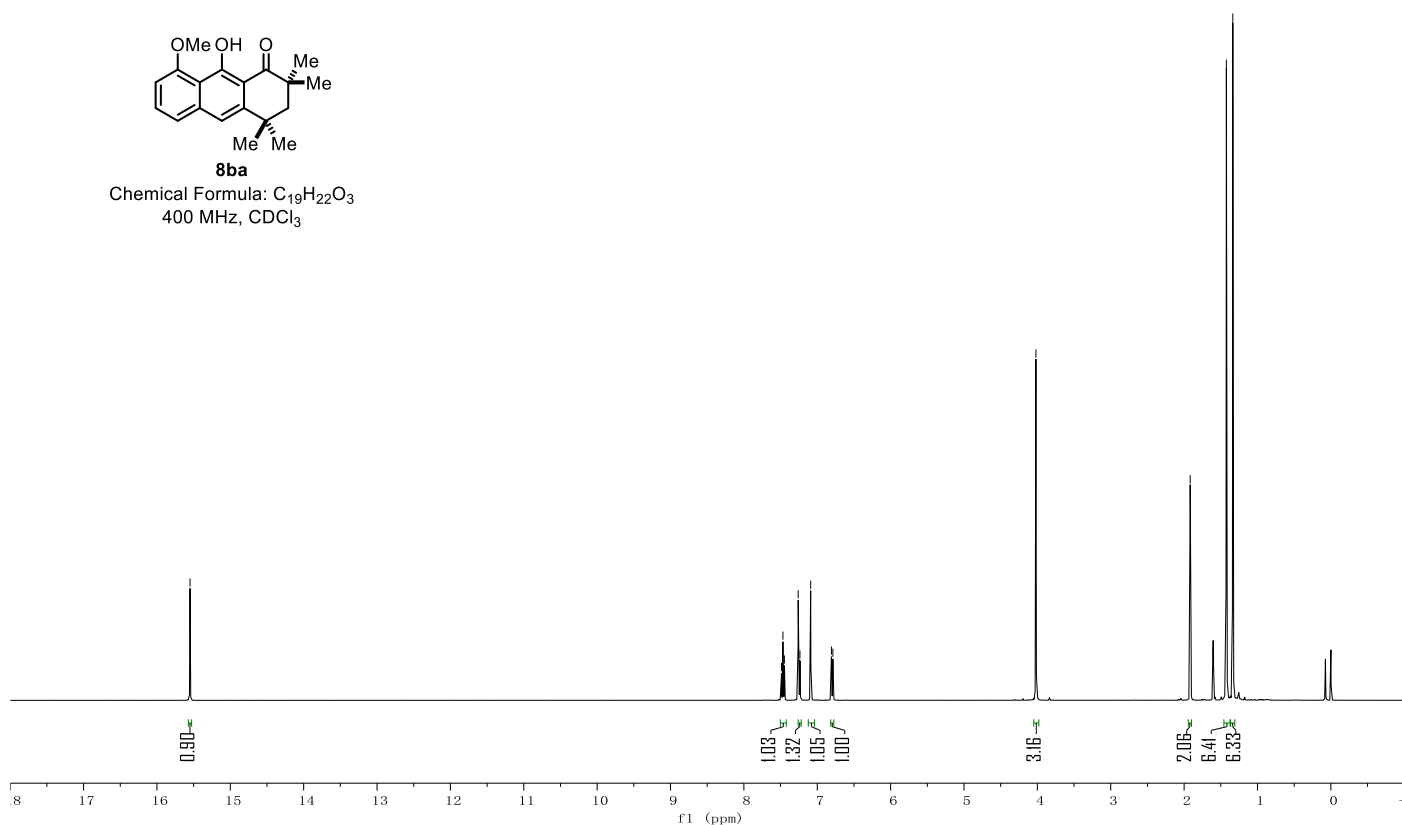

210.063

166.074

159.693

147.454

140.585

130.690

120.087

114.940

113.958

109.352

105.523

56.171

49.832

41.523

33.547

32.506

28.930

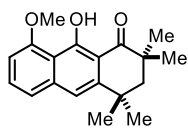

**8ba**

Chemical Formula: C<sub>19</sub>H<sub>22</sub>O<sub>3</sub>  
100 MHz, CDCl<sub>3</sub>

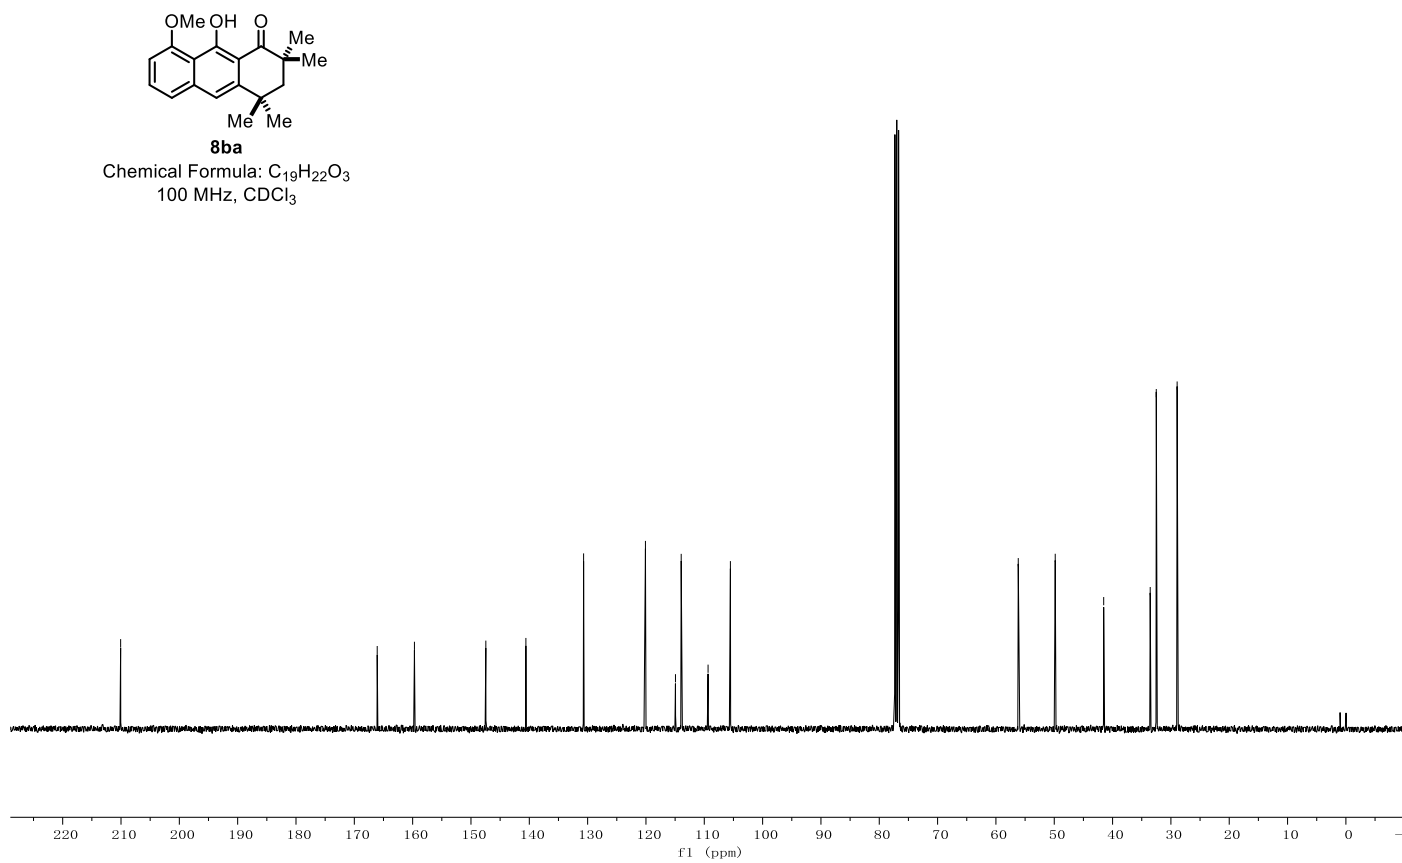



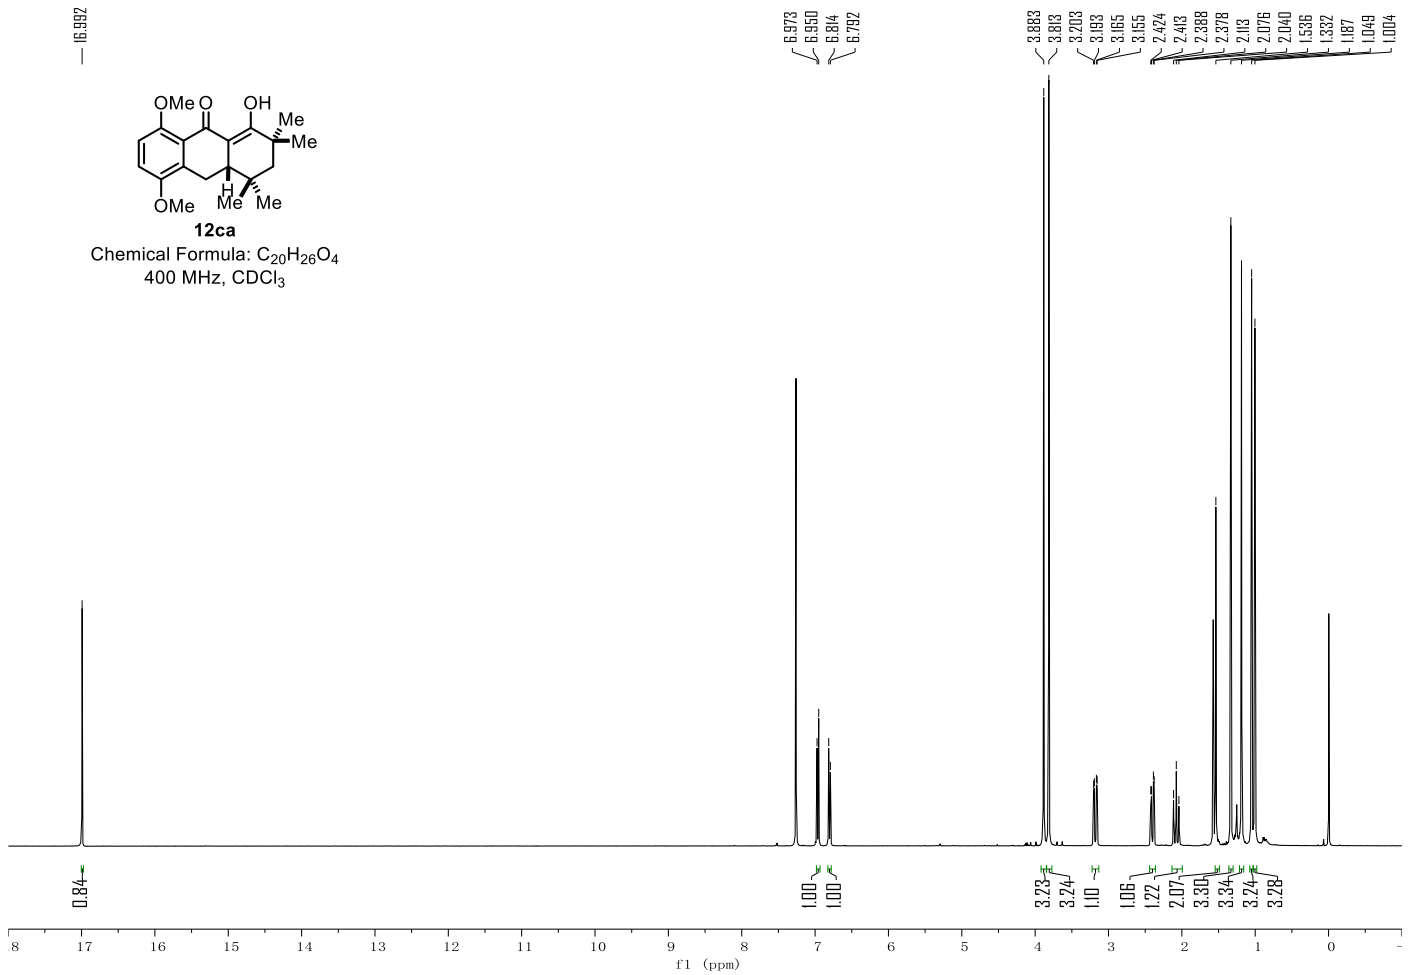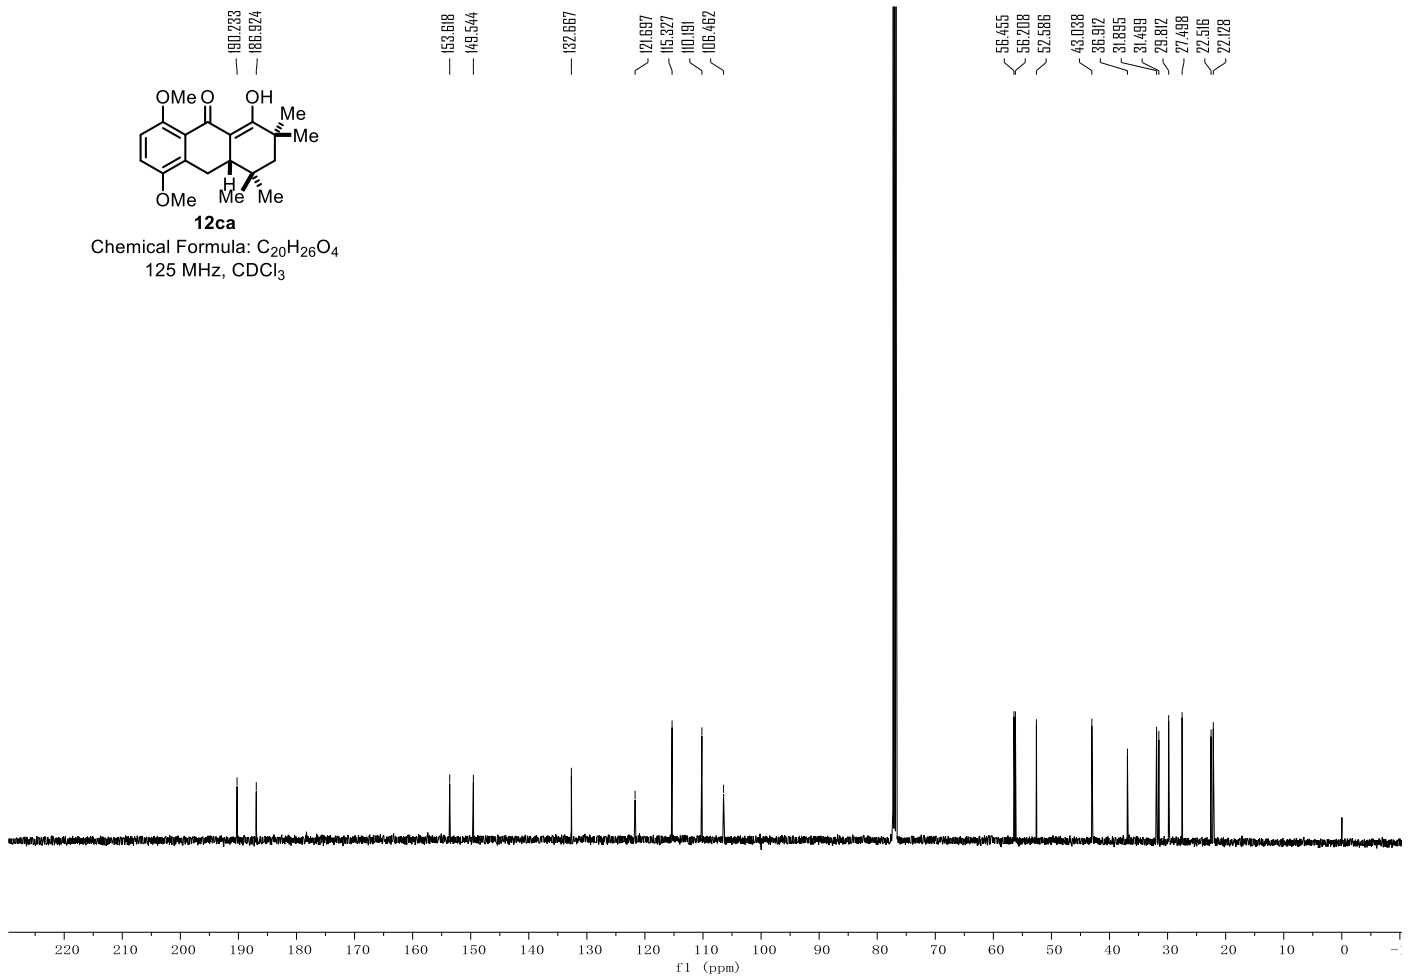

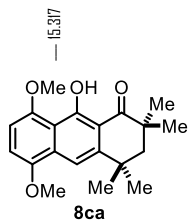

Chemical Formula: C<sub>20</sub>H<sub>24</sub>O<sub>4</sub>  
400 MHz, CDCl<sub>3</sub>

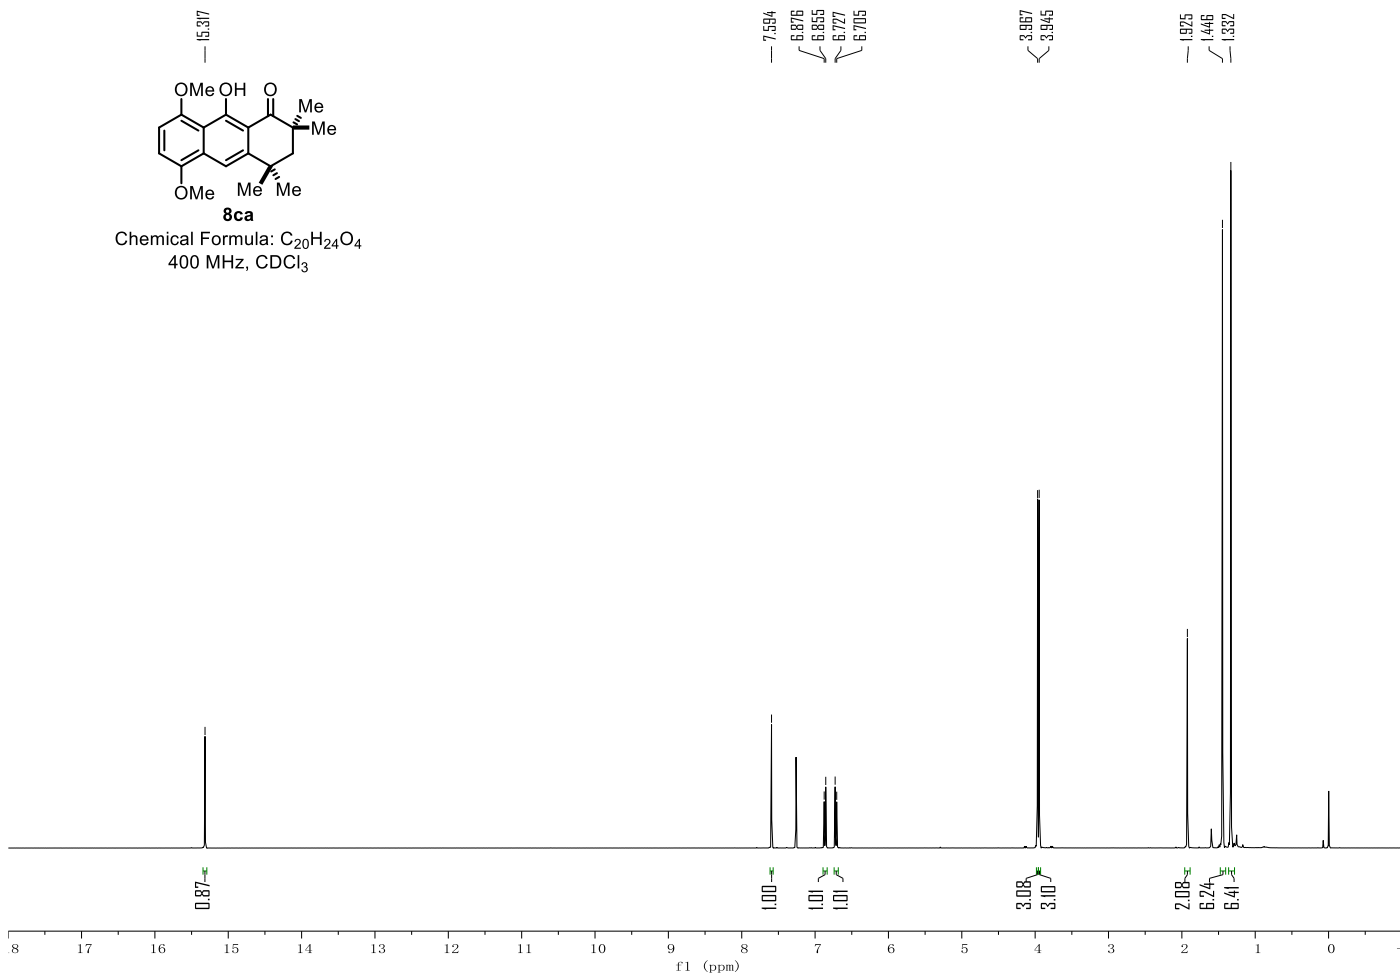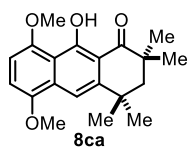

Chemical Formula: C<sub>20</sub>H<sub>24</sub>O<sub>4</sub>  
100 MHz, CDCl<sub>3</sub>

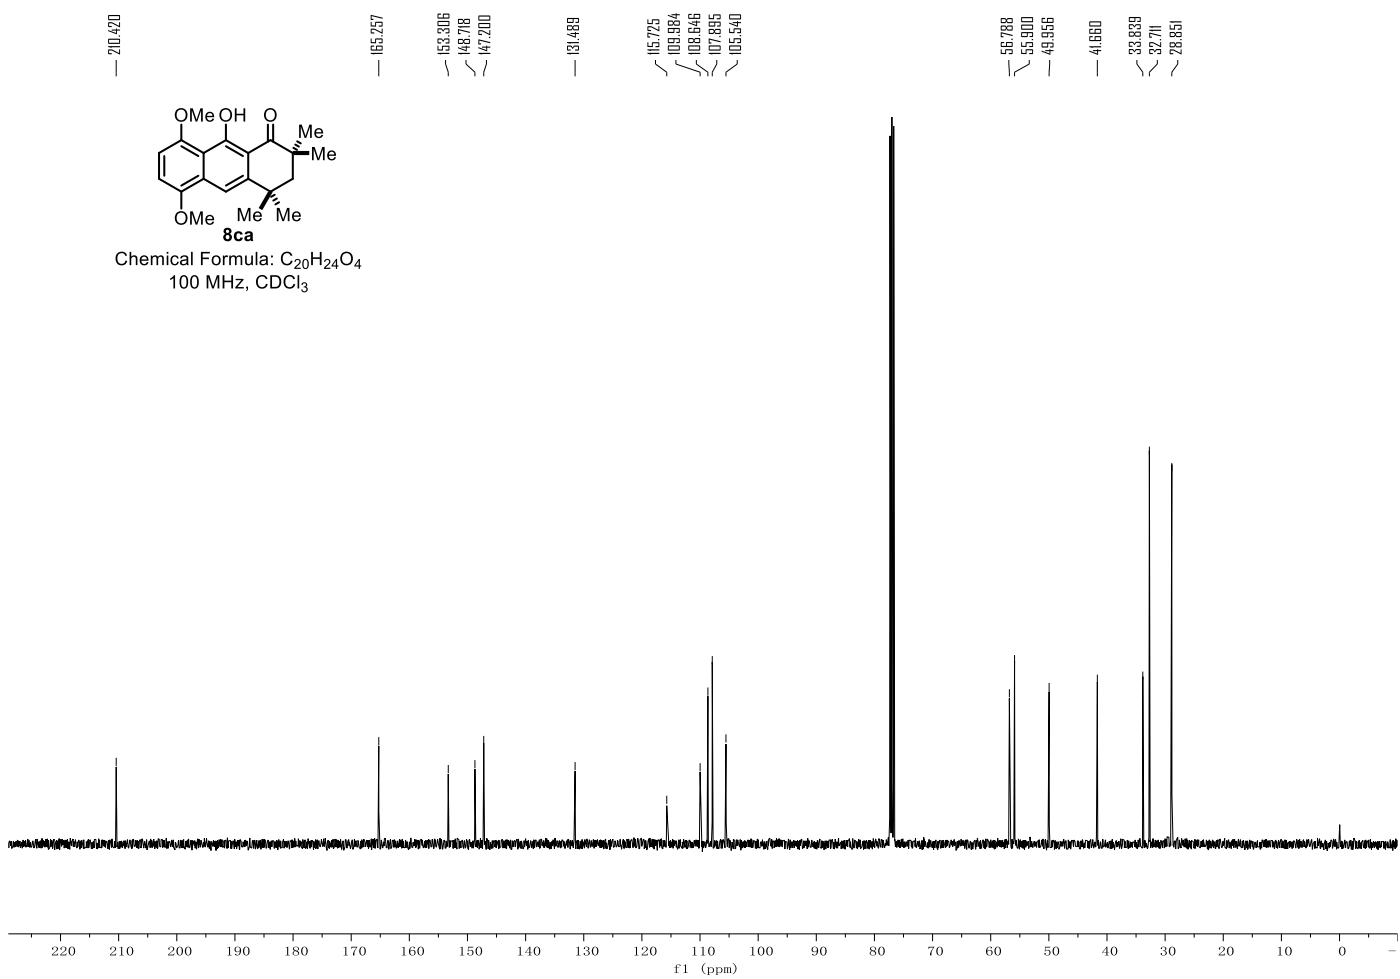

17.057

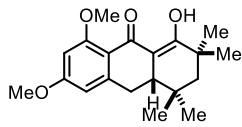

**12da**

Chemical Formula: C<sub>20</sub>H<sub>26</sub>O<sub>4</sub>  
400 MHz, CDCl<sub>3</sub>

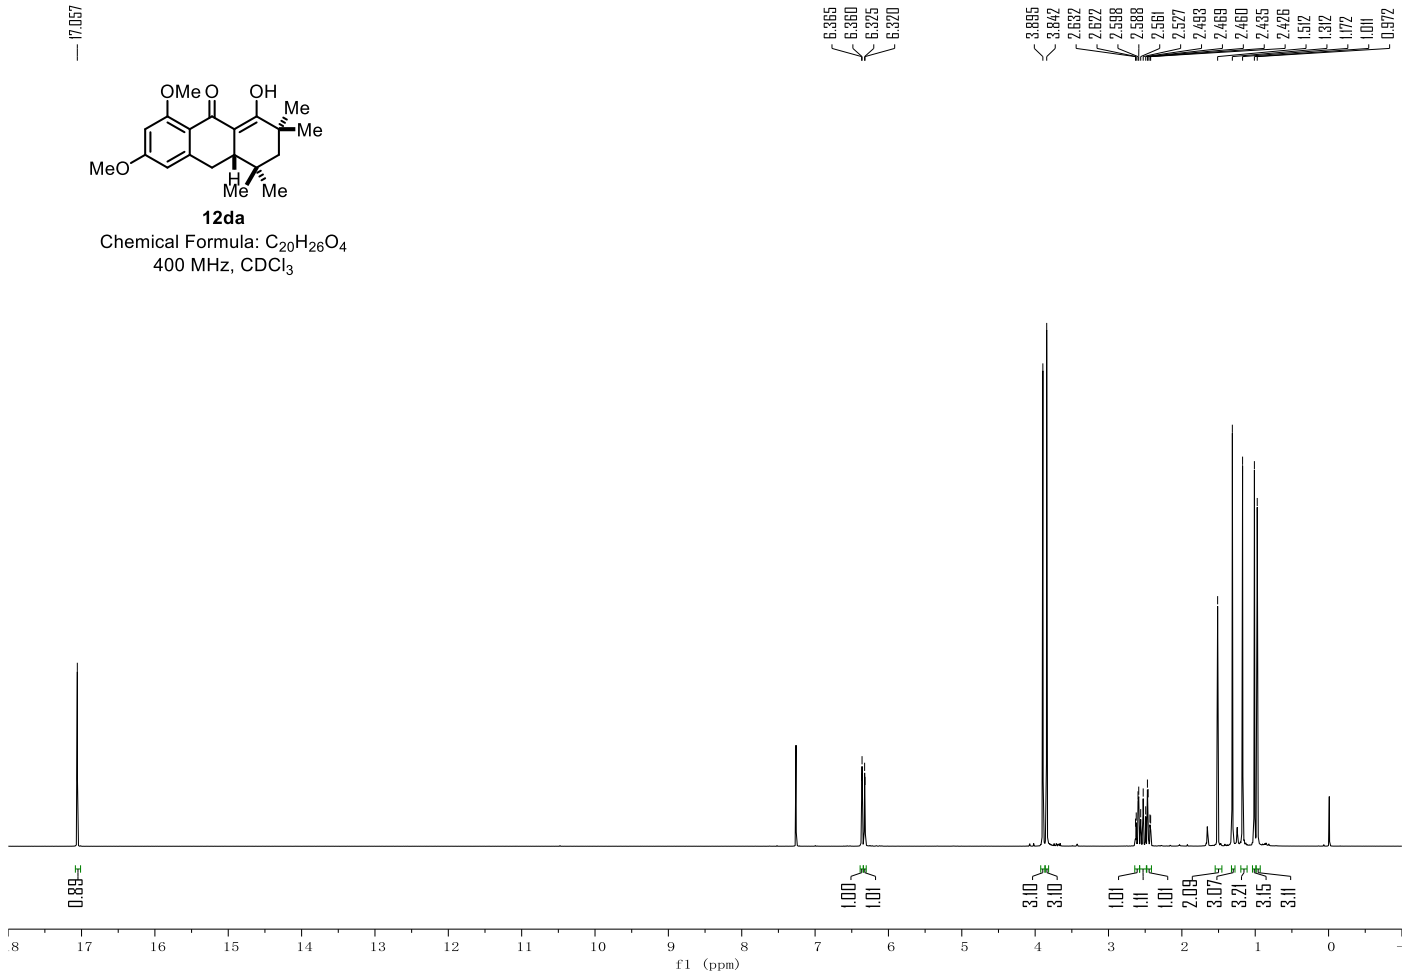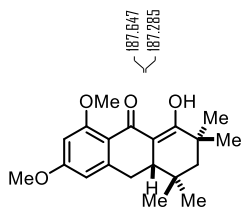

**12da**

Chemical Formula: C<sub>20</sub>H<sub>26</sub>O<sub>4</sub>  
125 MHz, CDCl<sub>3</sub>

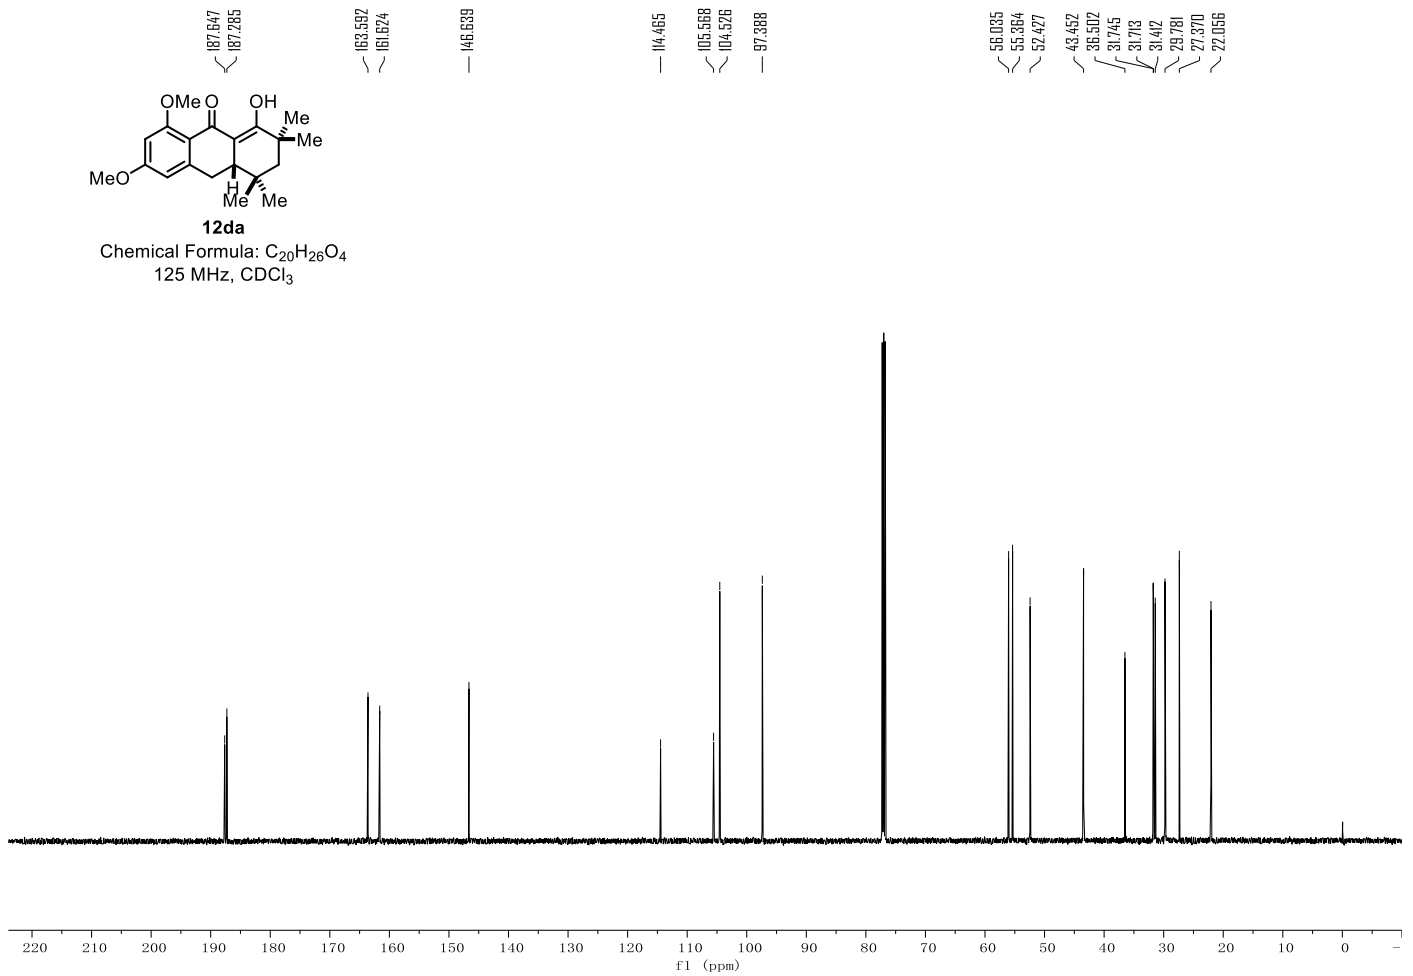

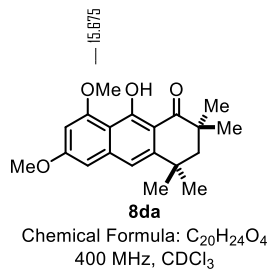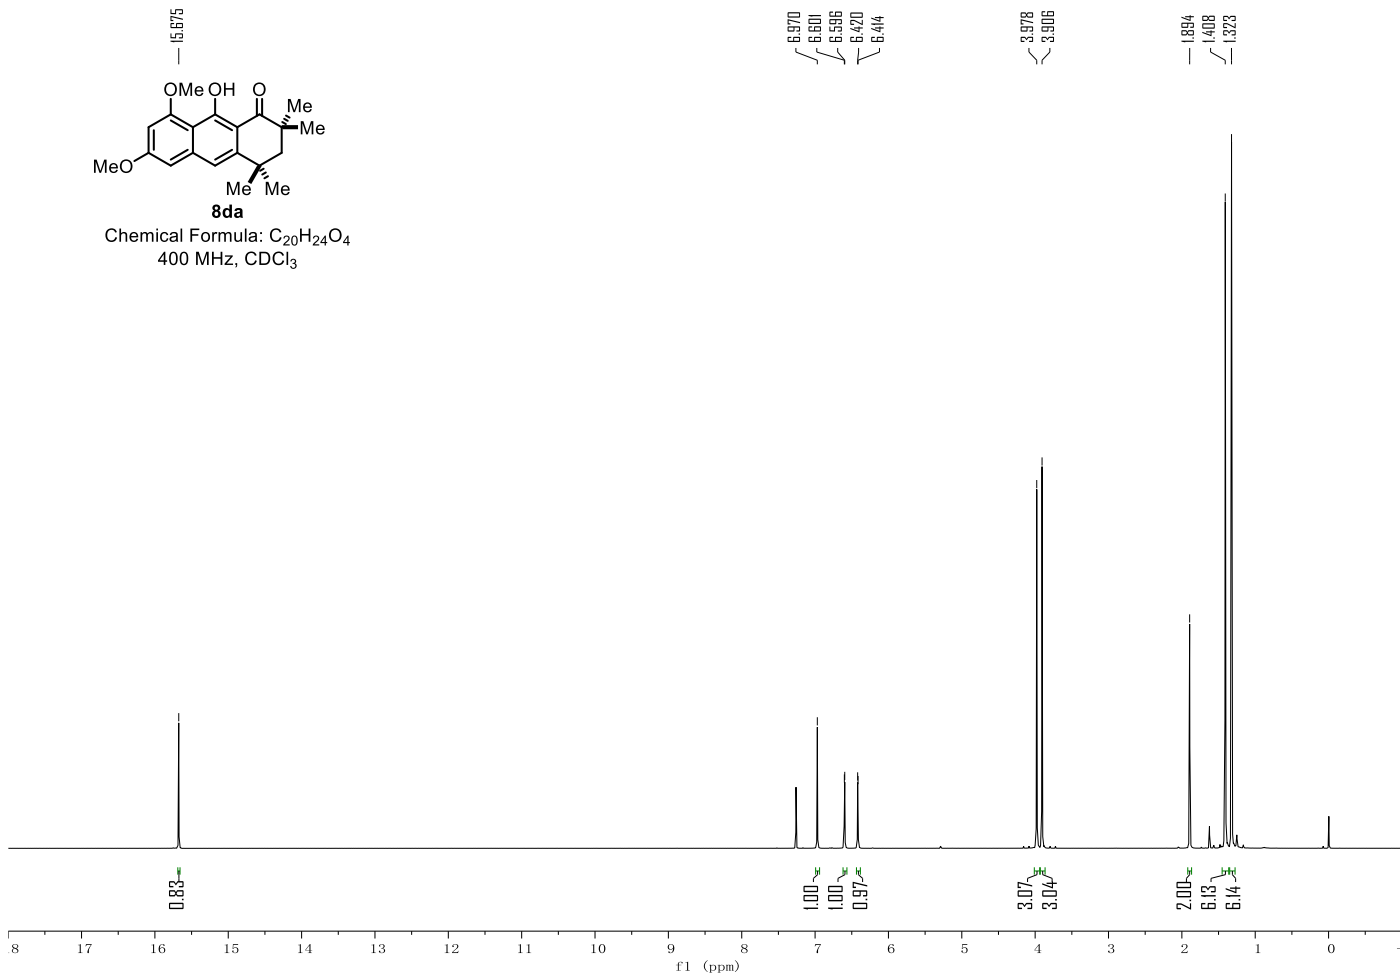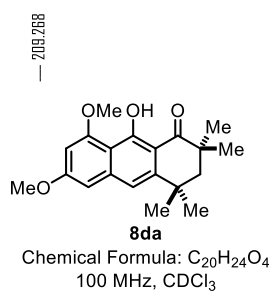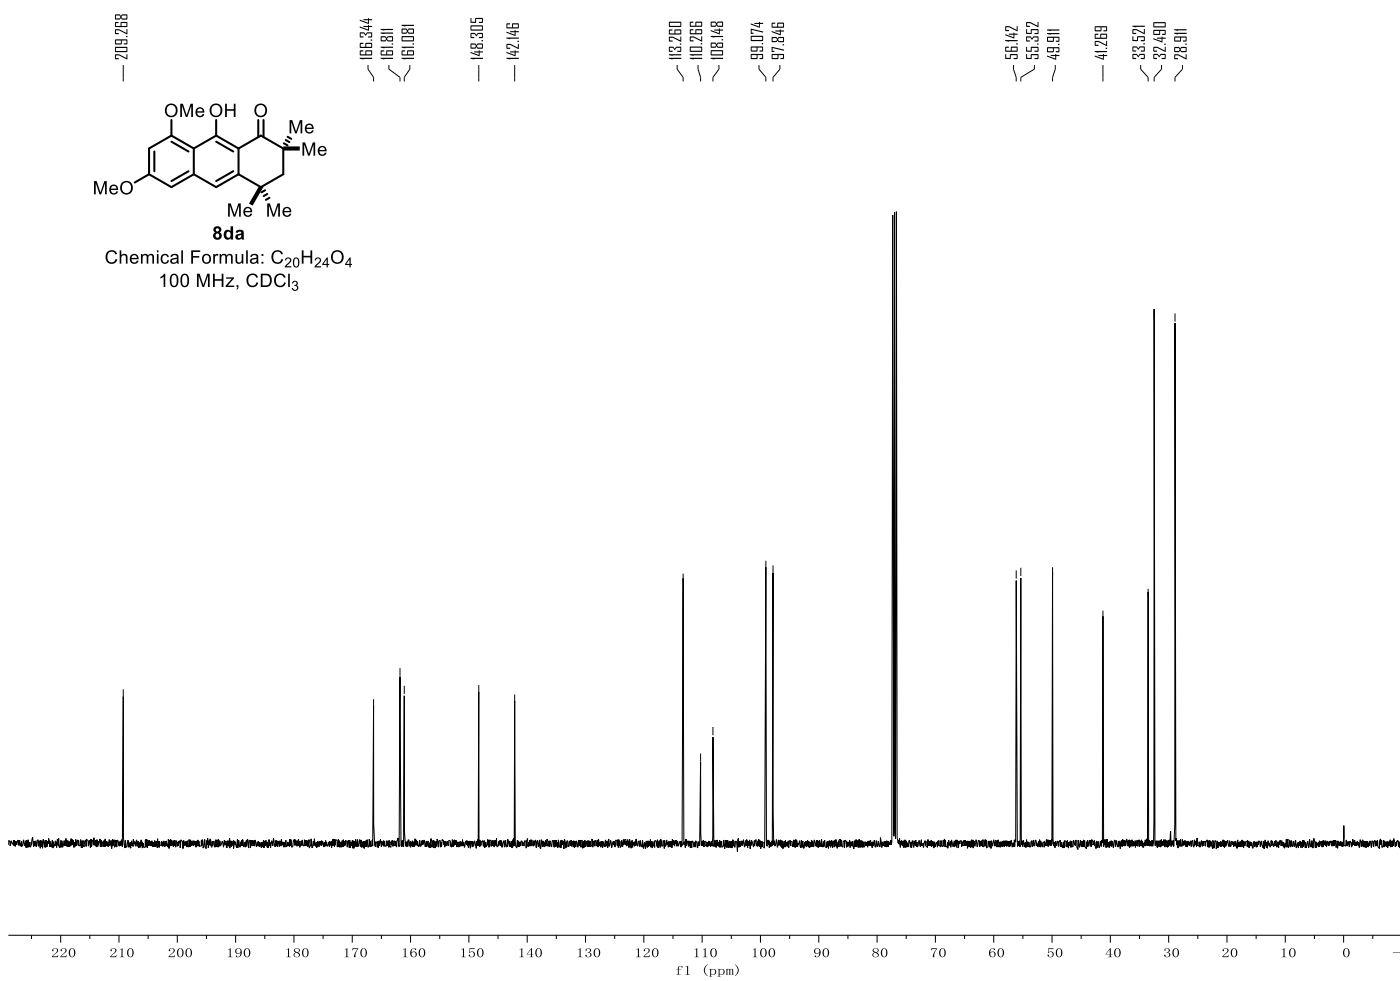

17.045

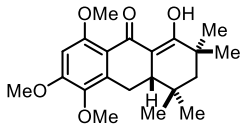

**12ea**

Chemical Formula: C<sub>21</sub>H<sub>28</sub>O<sub>5</sub>  
400 MHz, CDCl<sub>3</sub>

6.400

3.972  
3.972  
3.718  
3.181  
3.171  
3.444  
3.155  
2.377  
2.388  
2.341  
2.332  
2.445  
2.089  
2.073  
1.515  
1.312  
1.688  
1.038  
0.985

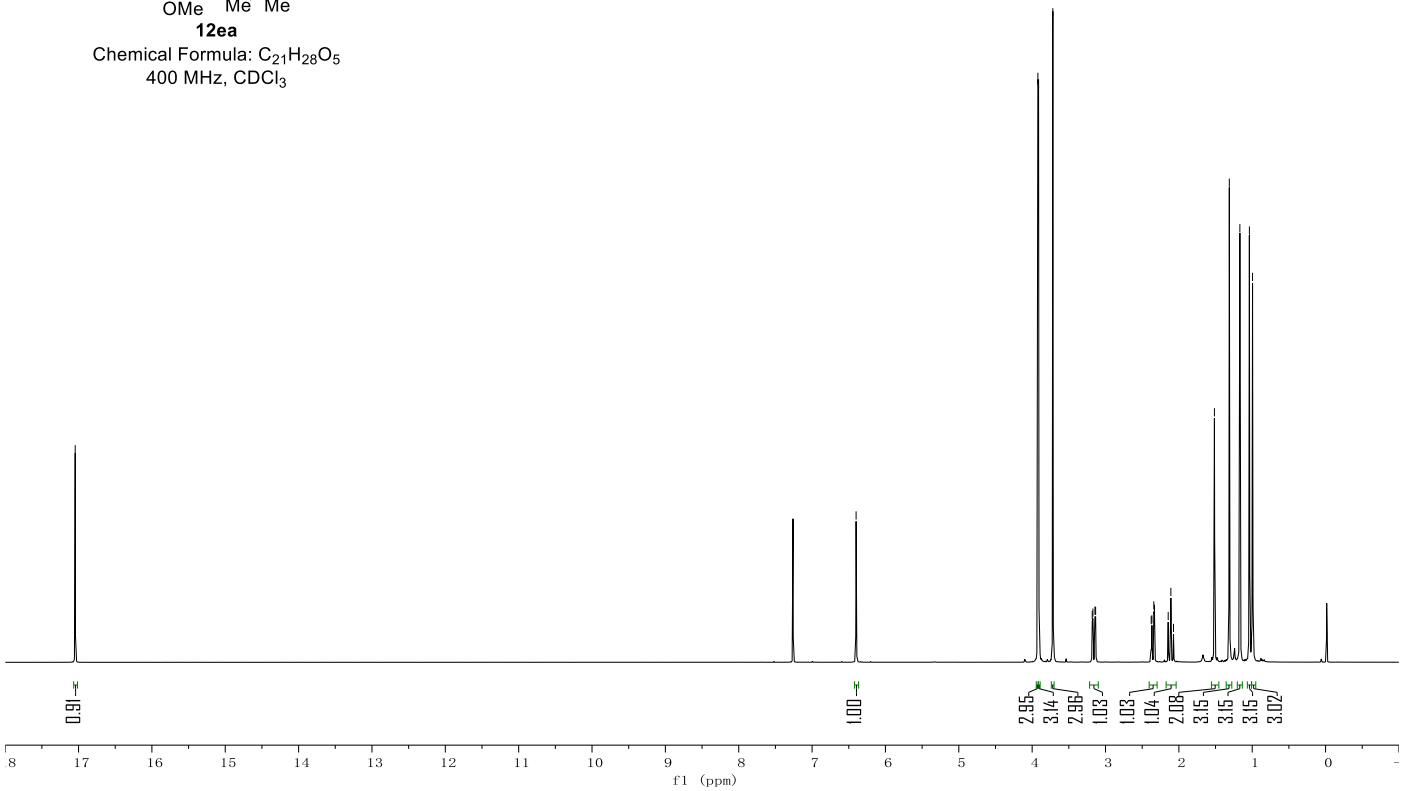

188.030

187.333

157.579

156.695

138.689

137.540

113.836

105.716

95.729

60.794

56.472

55.707

52.515

43.883

36.596

31.824

31.423

29.754

27.873

23.225

22.037

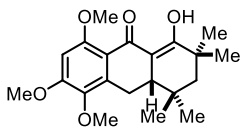

**12ea**

Chemical Formula: C<sub>21</sub>H<sub>28</sub>O<sub>5</sub>  
100 MHz, CDCl<sub>3</sub>

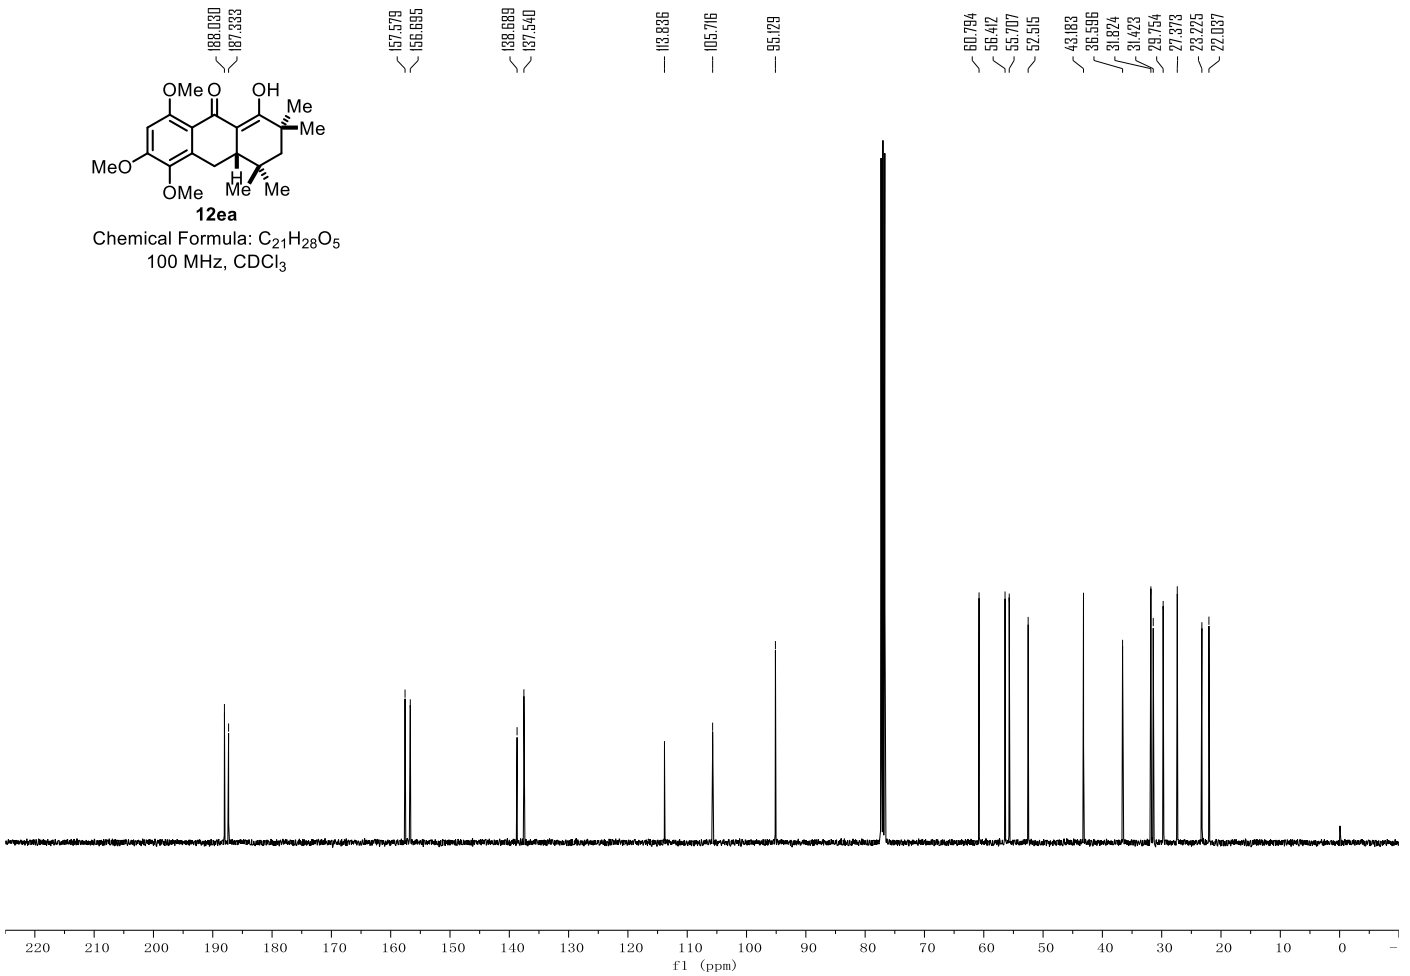

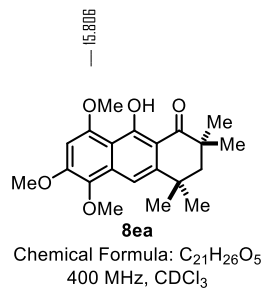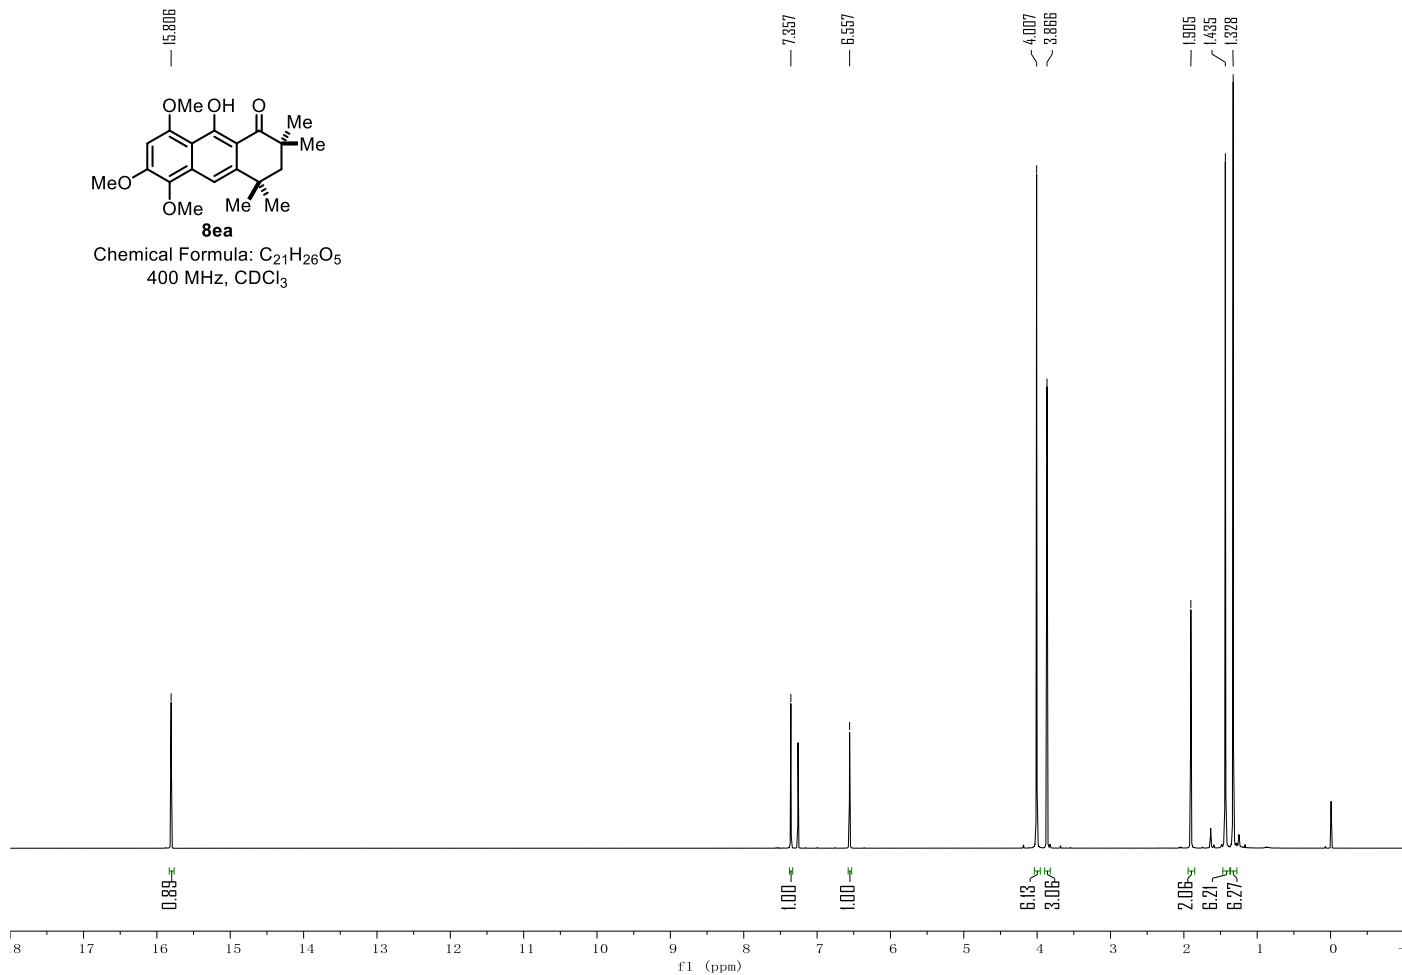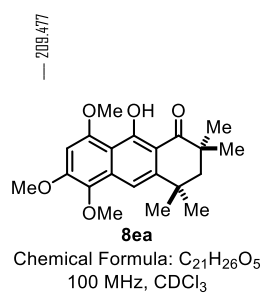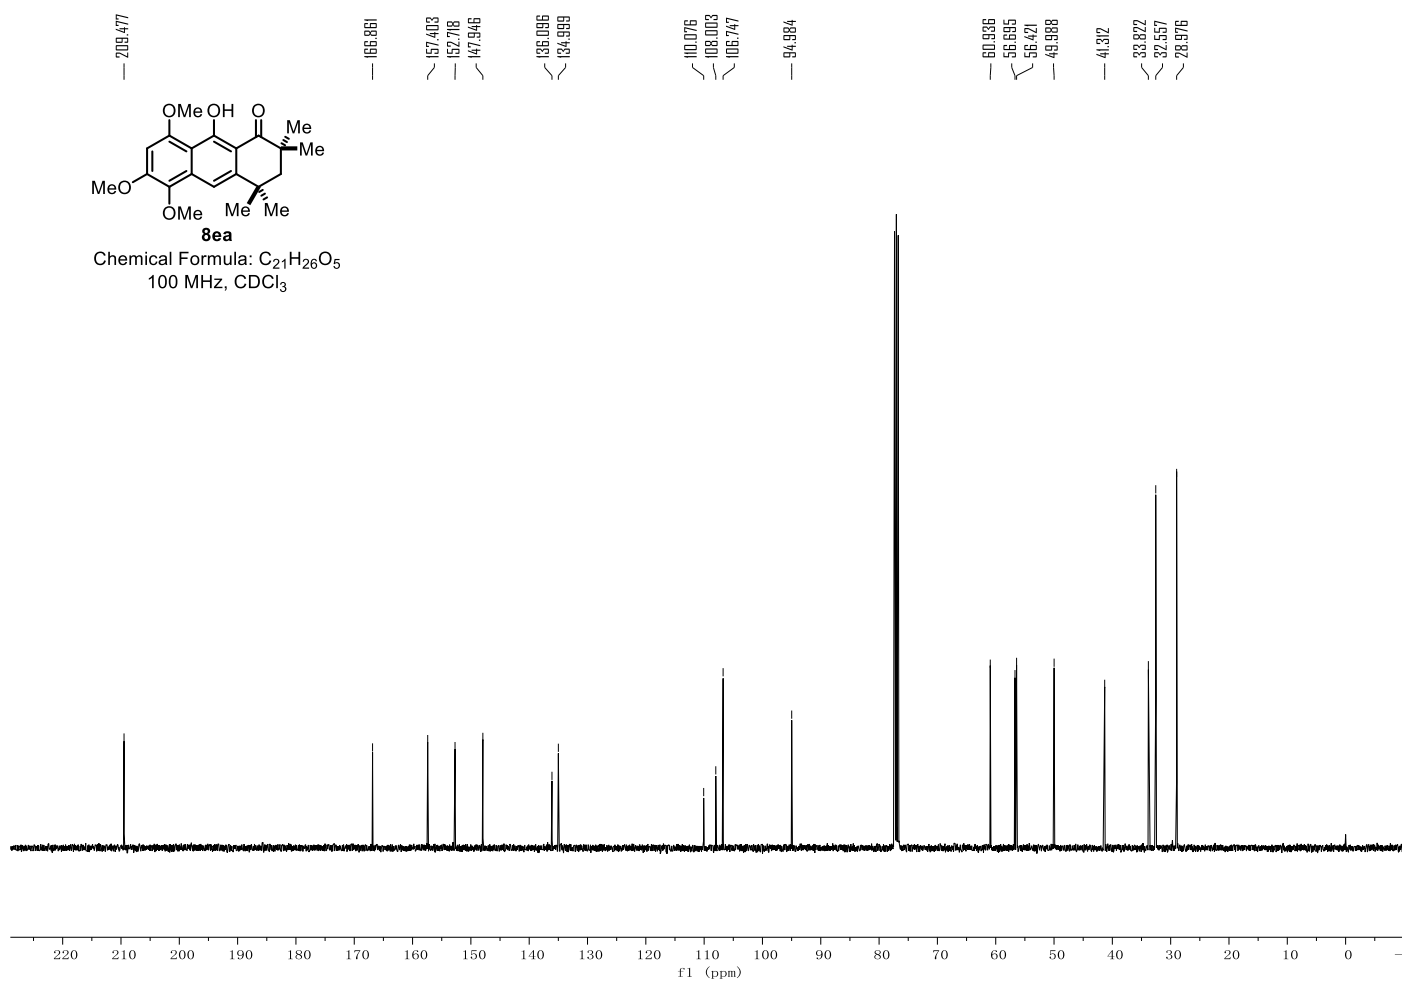

17.191

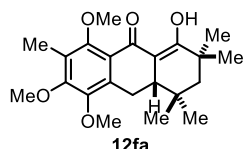

**12fa**

Chemical Formula:  $C_{22}H_{30}O_5$   
400 MHz,  $CDCl_3$

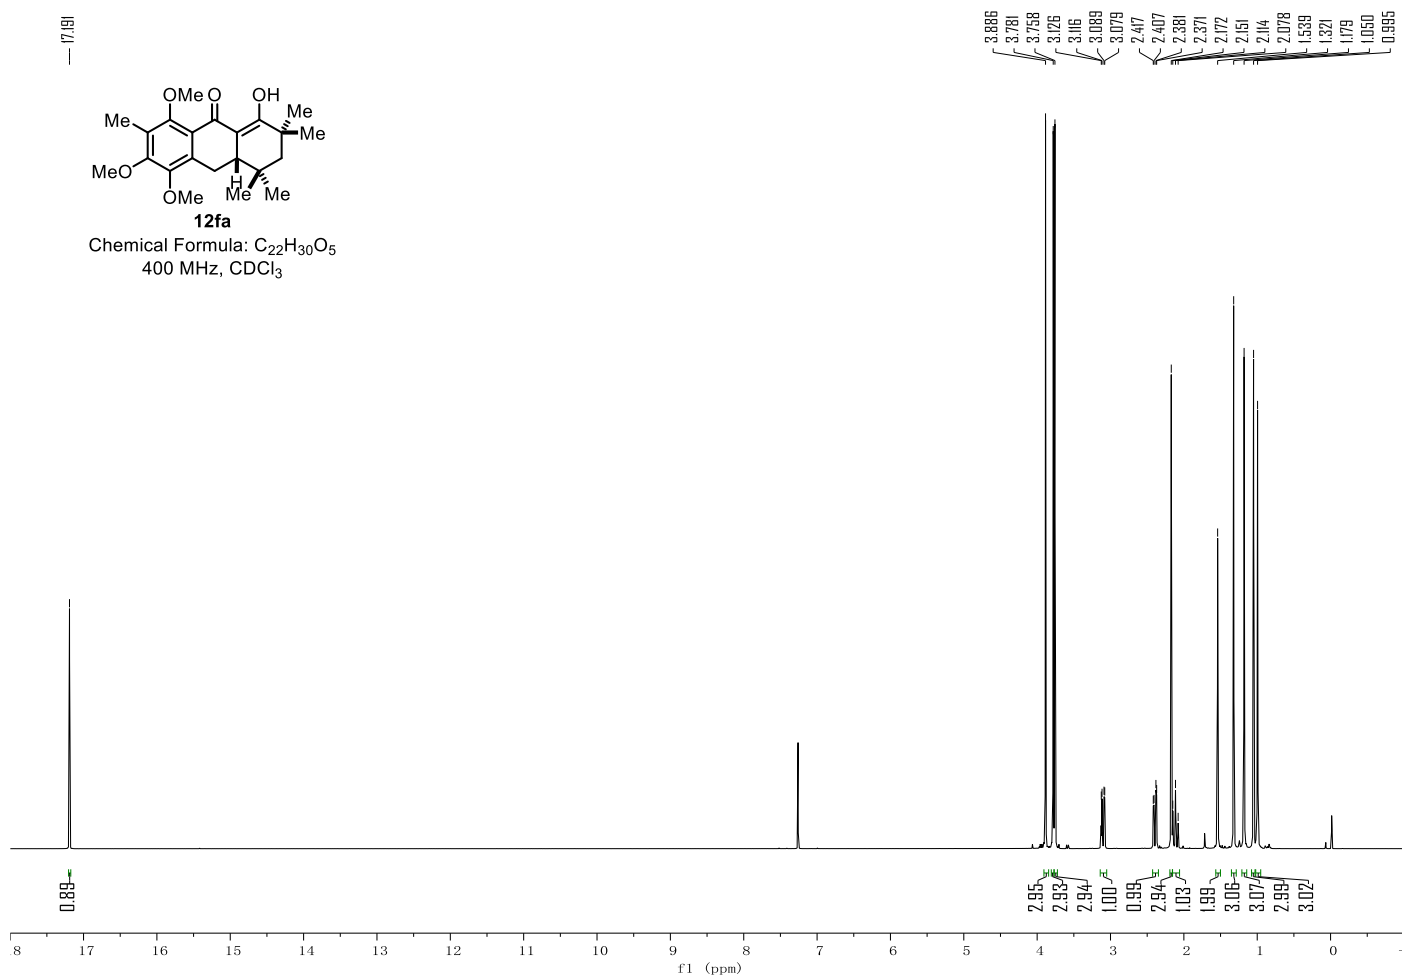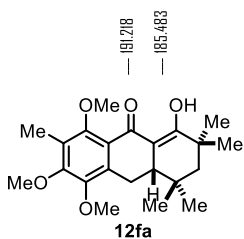

**12fa**

Chemical Formula:  $C_{22}H_{30}O_5$   
100 MHz,  $CDCl_3$

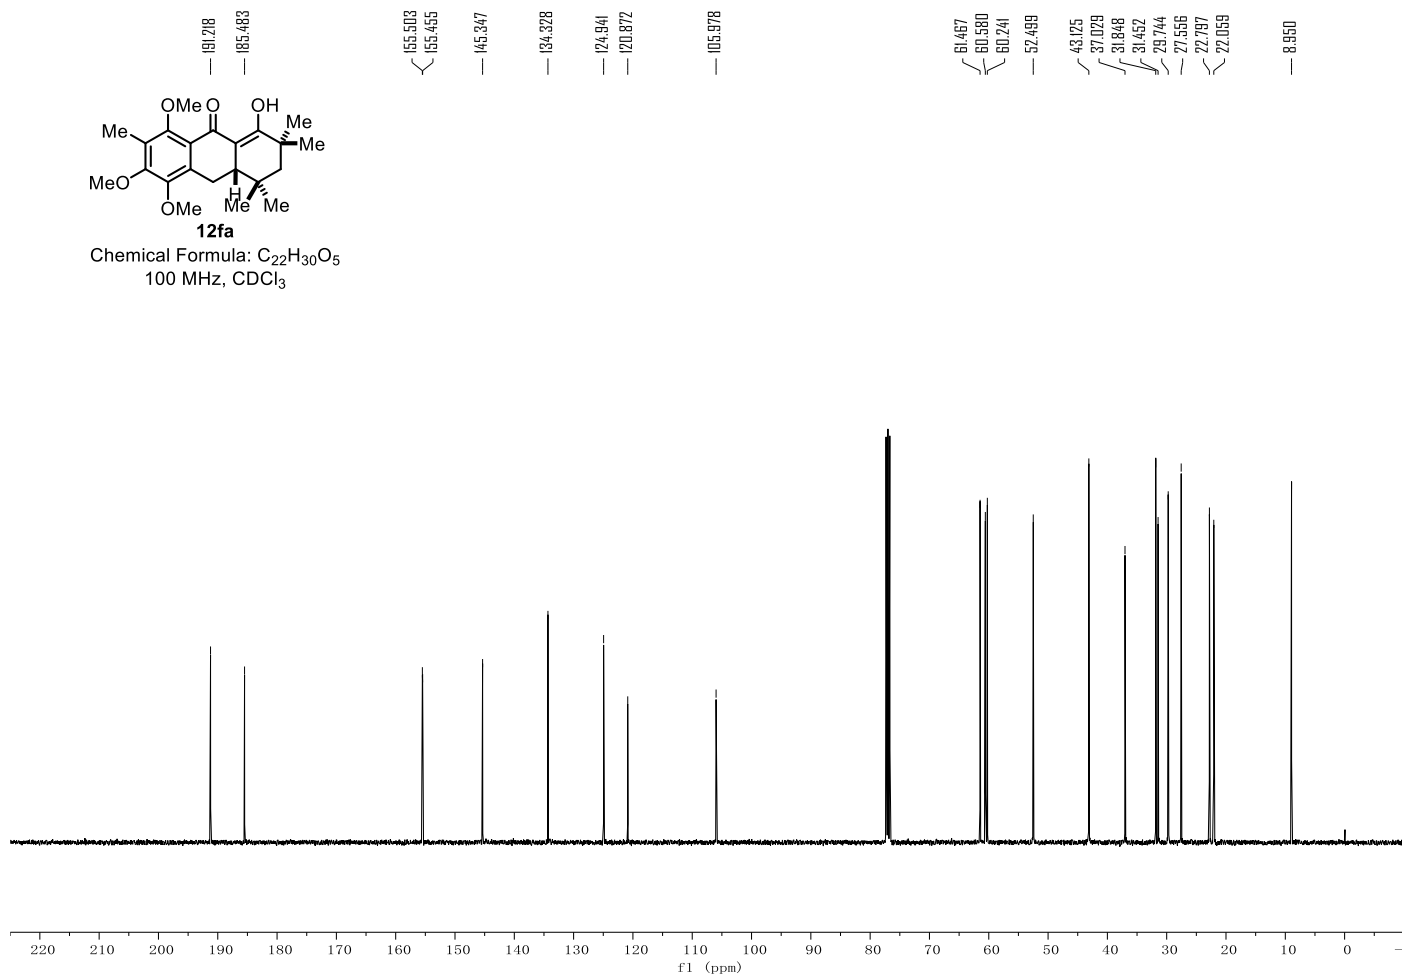

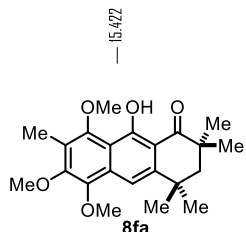

Chemical Formula: C<sub>22</sub>H<sub>28</sub>O<sub>5</sub>  
400 MHz, CDCl<sub>3</sub>

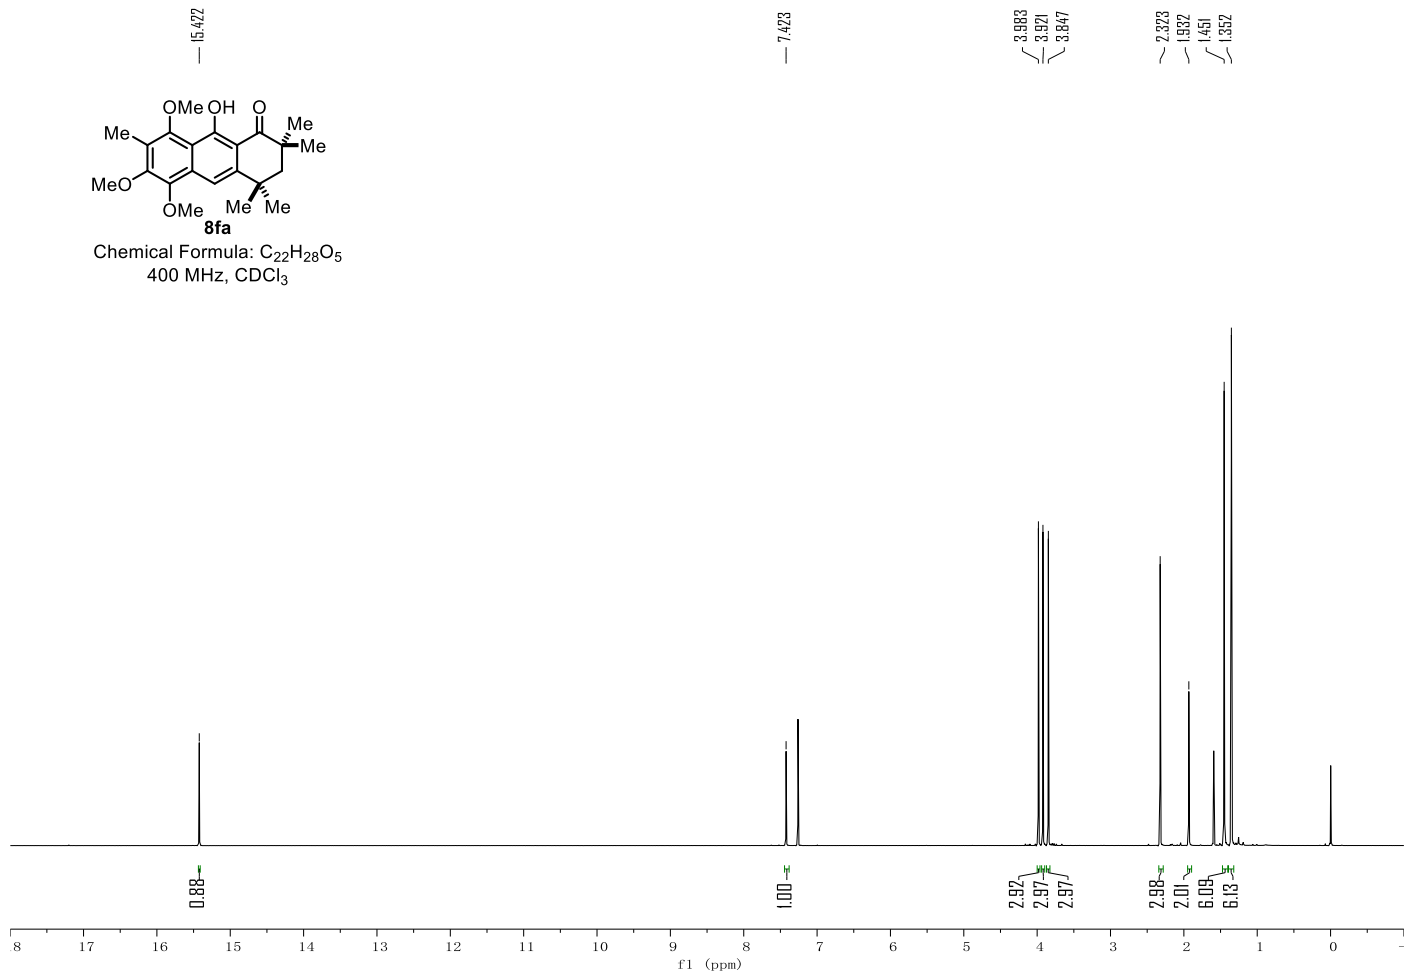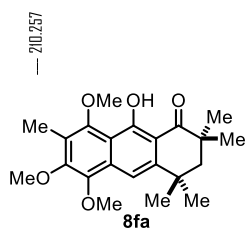

Chemical Formula: C<sub>22</sub>H<sub>28</sub>O<sub>5</sub>  
100 MHz, CDCl<sub>3</sub>

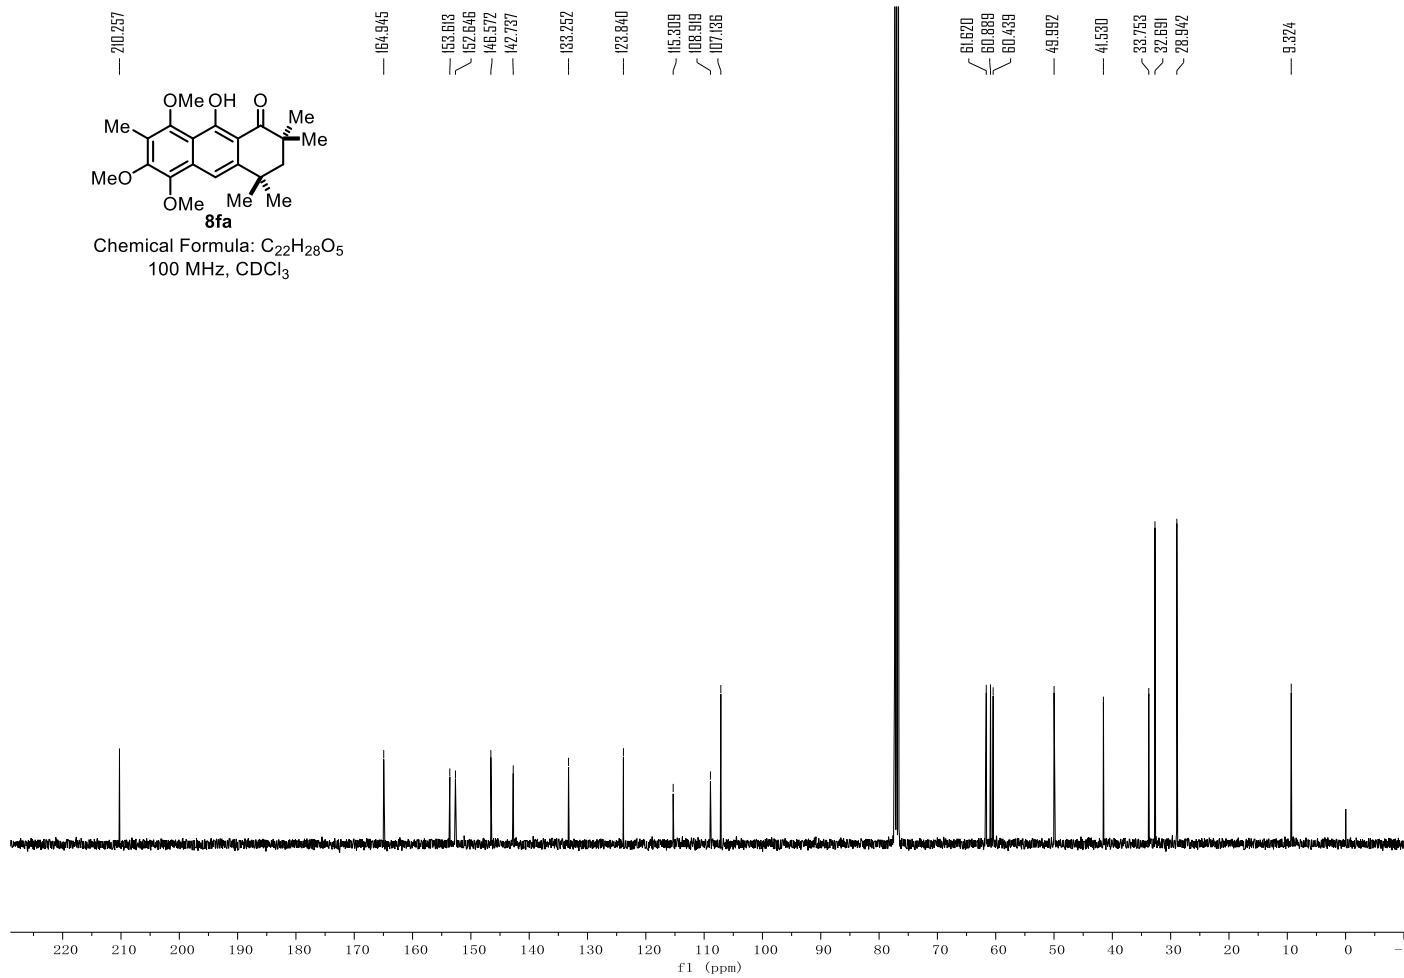



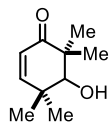

**S7**

Chemical Formula: C<sub>10</sub>H<sub>16</sub>O<sub>2</sub>  
400 MHz, CDCl<sub>3</sub>

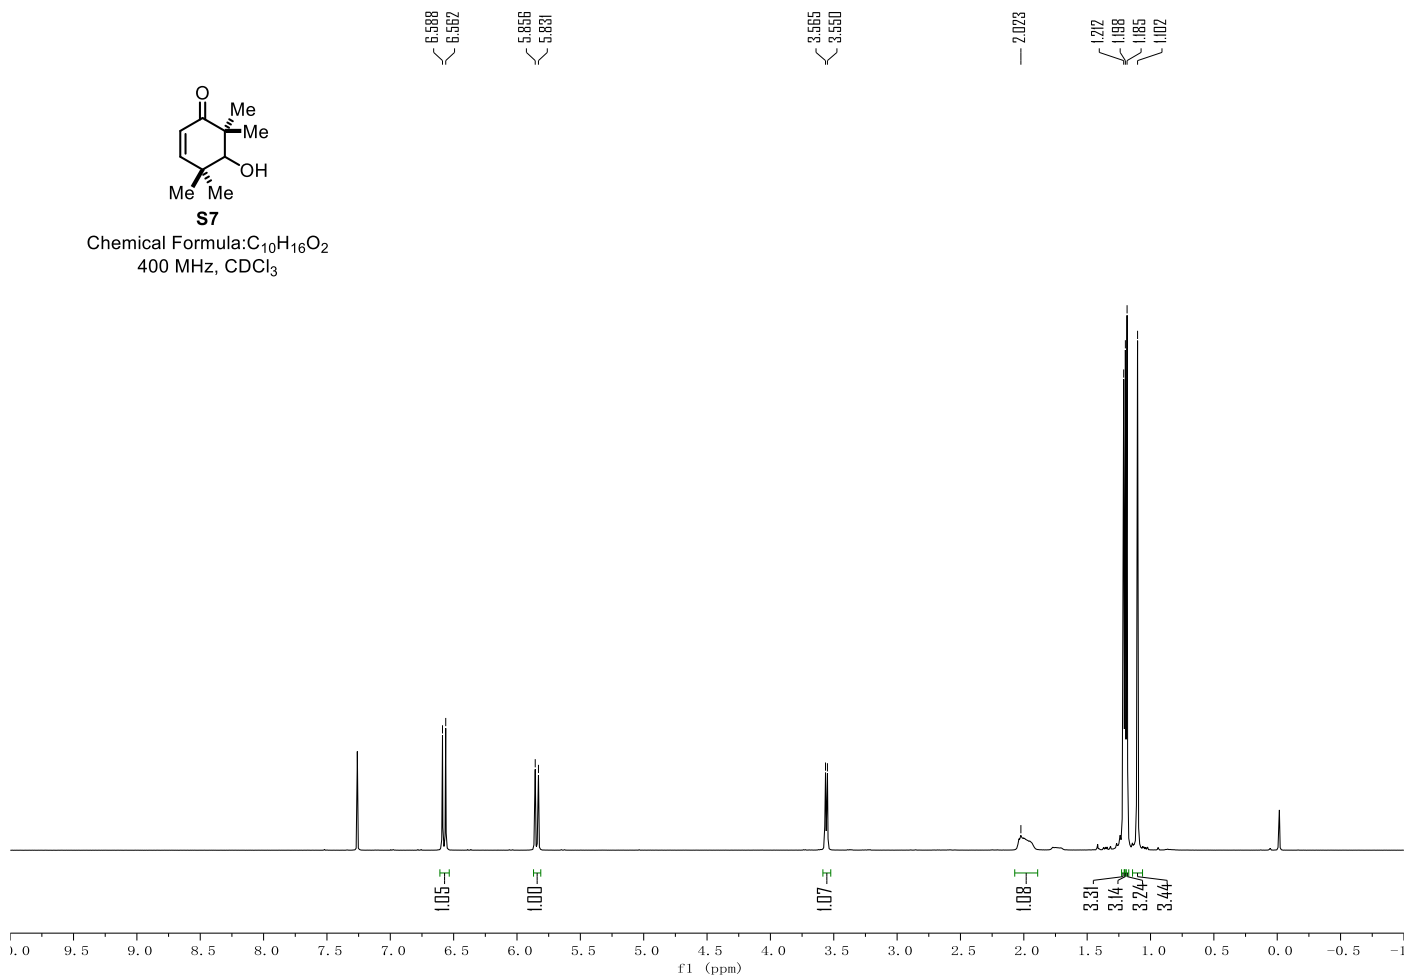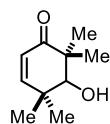

**S7**

Chemical Formula: C<sub>10</sub>H<sub>16</sub>O<sub>2</sub>  
100 MHz, CDCl<sub>3</sub>

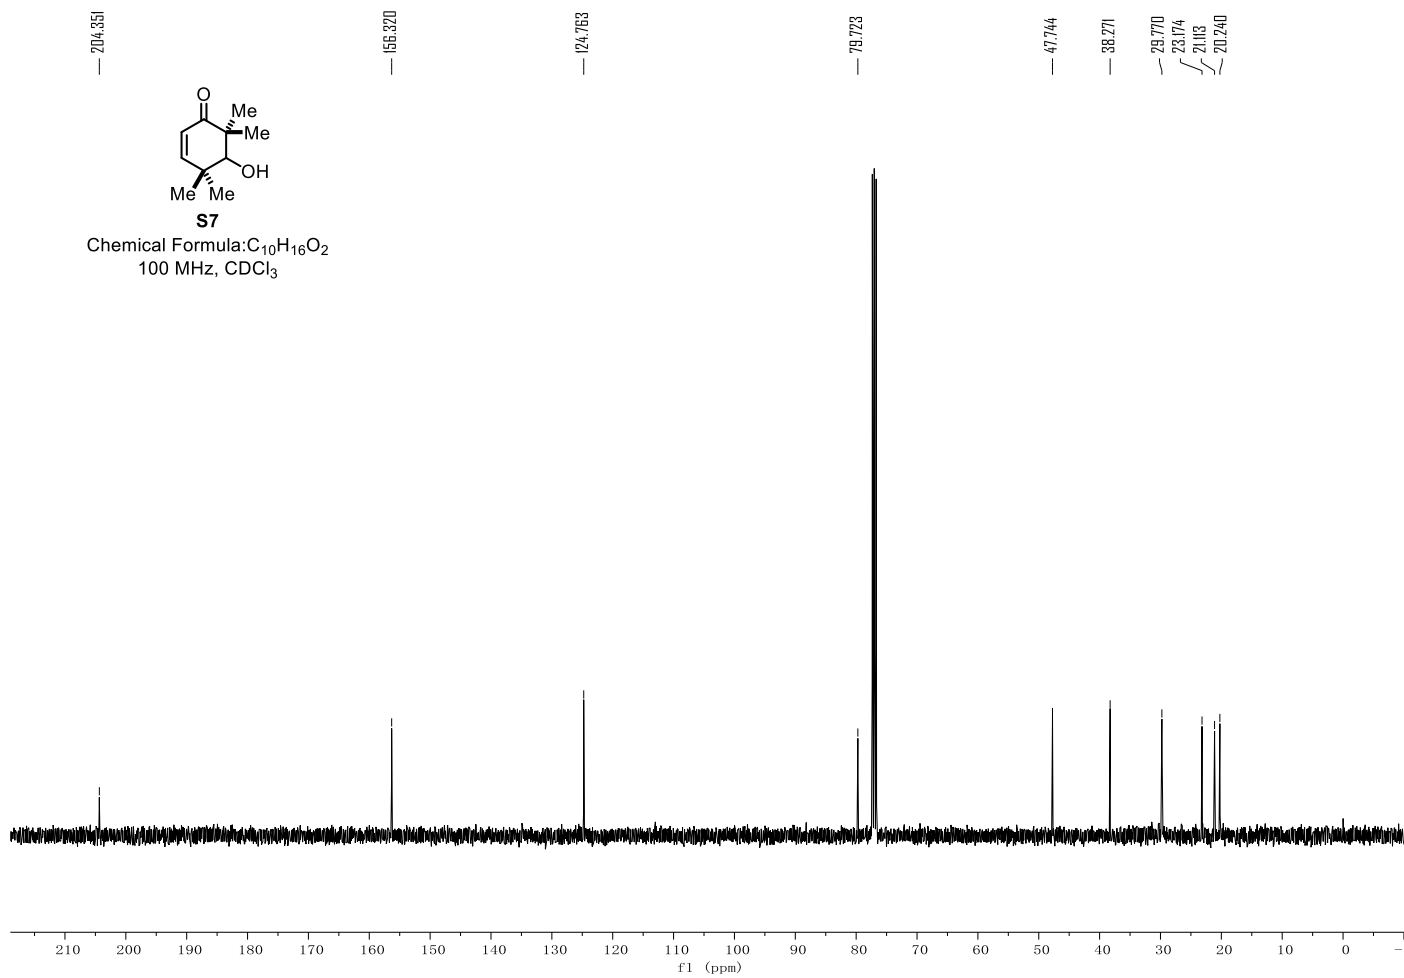

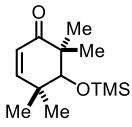

**7b**

Chemical Formula: C<sub>13</sub>H<sub>24</sub>O<sub>2</sub>Si  
400 MHz, CDCl<sub>3</sub>

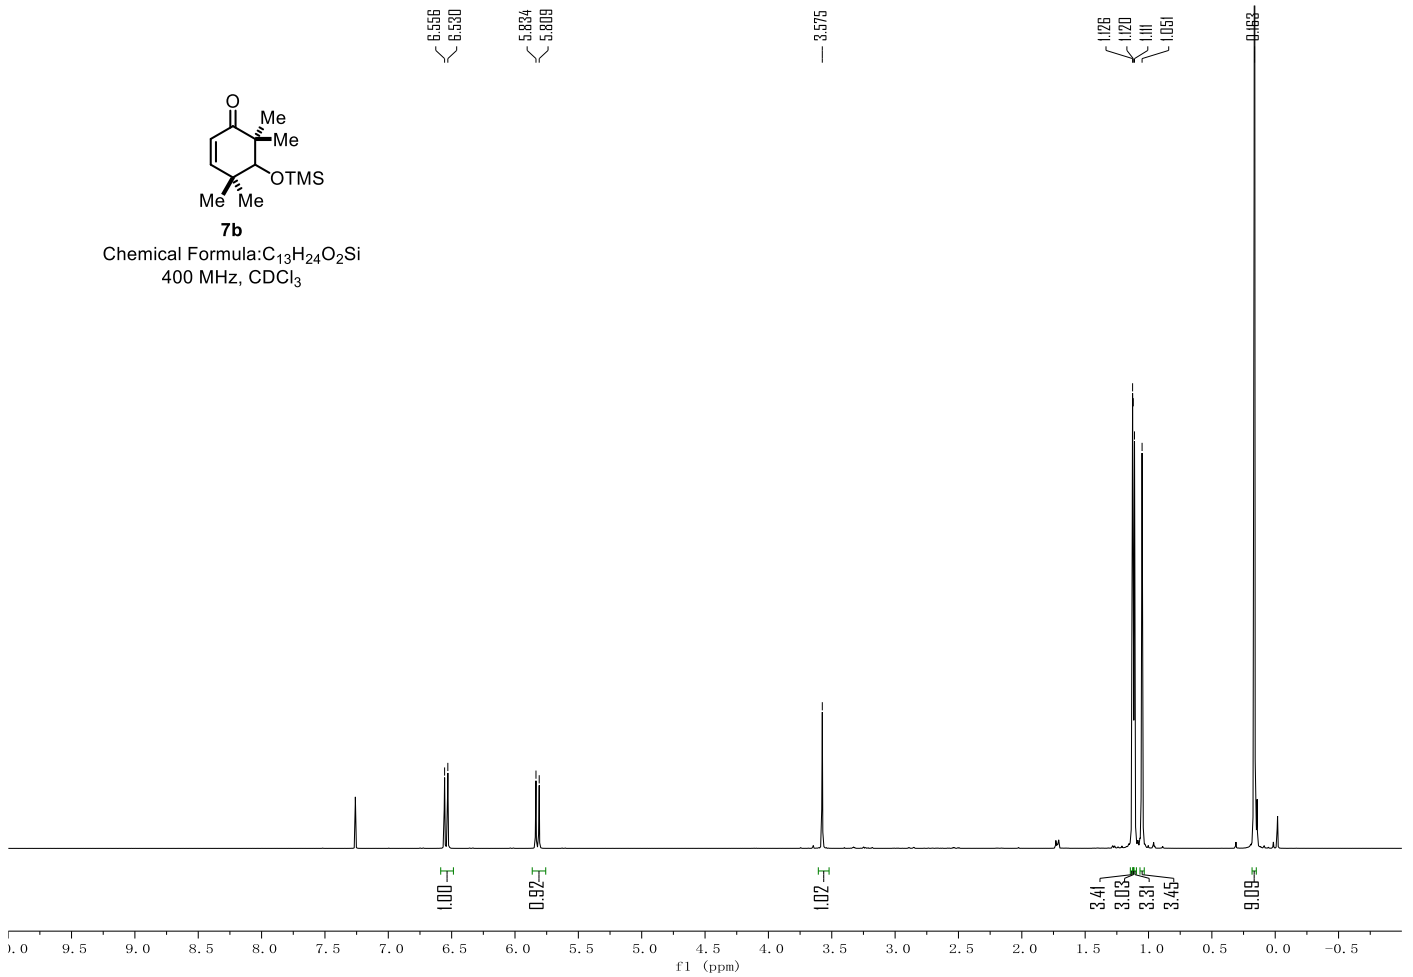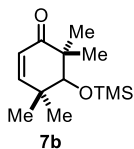

**7b**

Chemical Formula: C<sub>13</sub>H<sub>24</sub>O<sub>2</sub>Si  
100 MHz, CDCl<sub>3</sub>

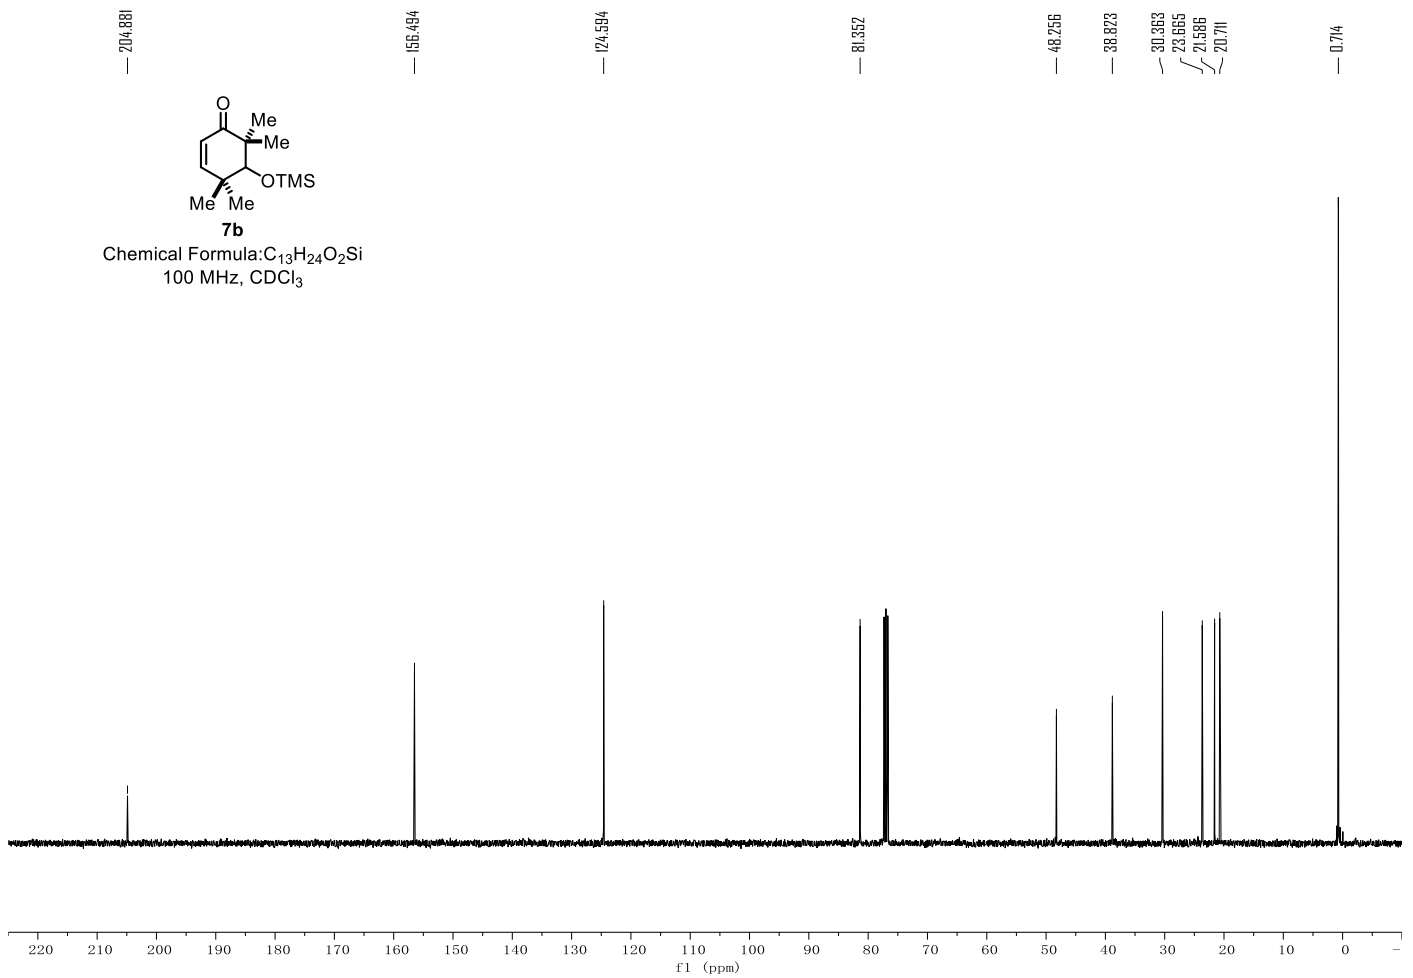

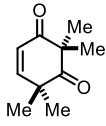

**7c**  
 Chemical Formula: C<sub>10</sub>H<sub>14</sub>O<sub>2</sub>  
 400 MHz, CDCl<sub>3</sub>

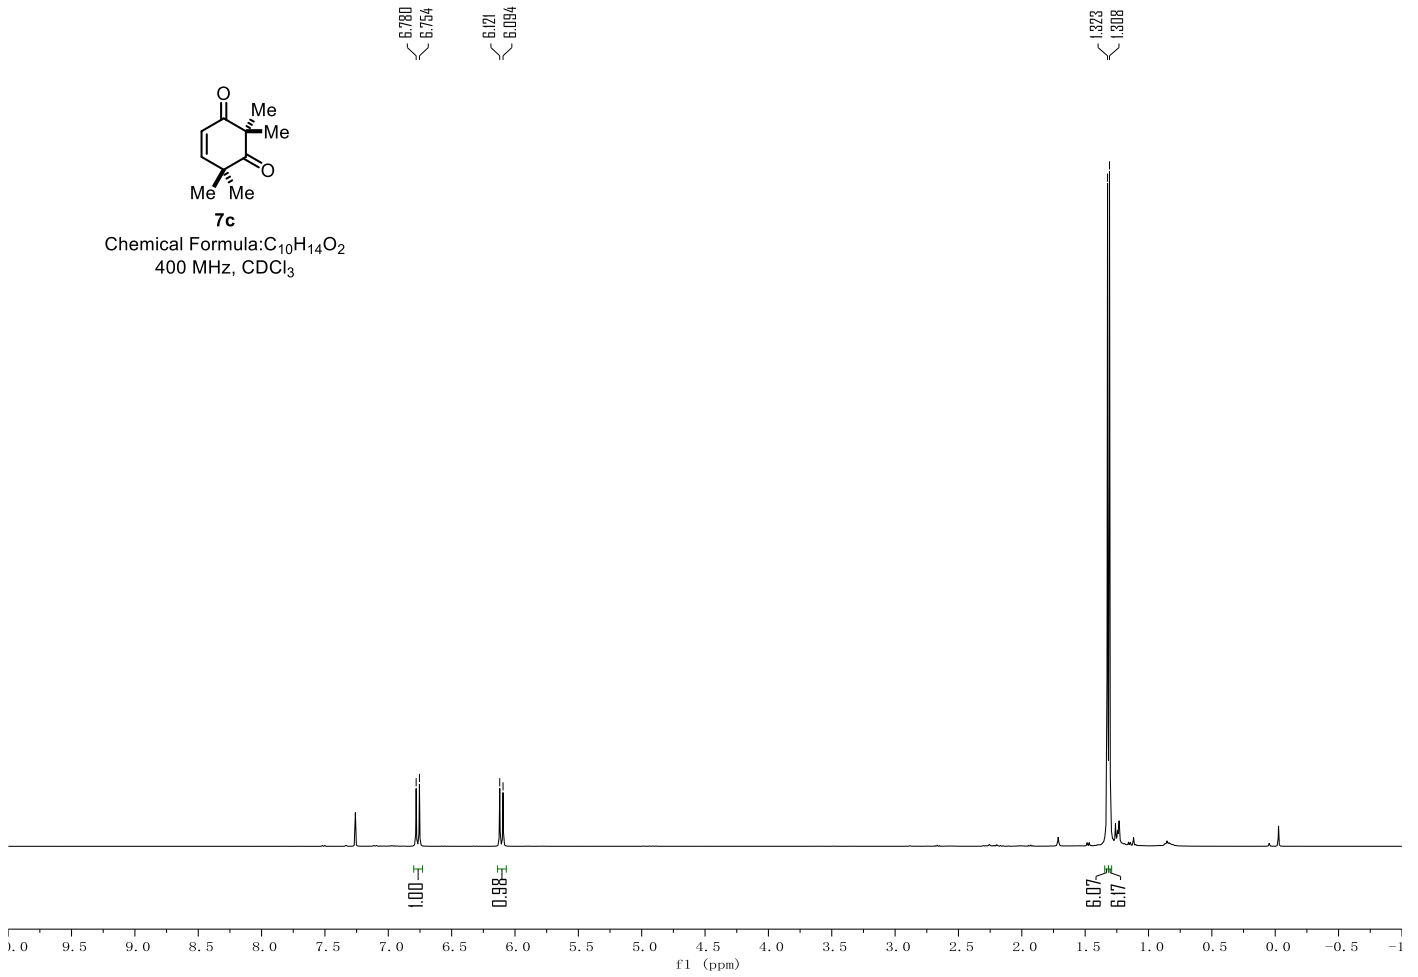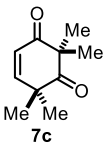

**7c**  
 Chemical Formula: C<sub>10</sub>H<sub>14</sub>O<sub>2</sub>  
 100 MHz, CDCl<sub>3</sub>

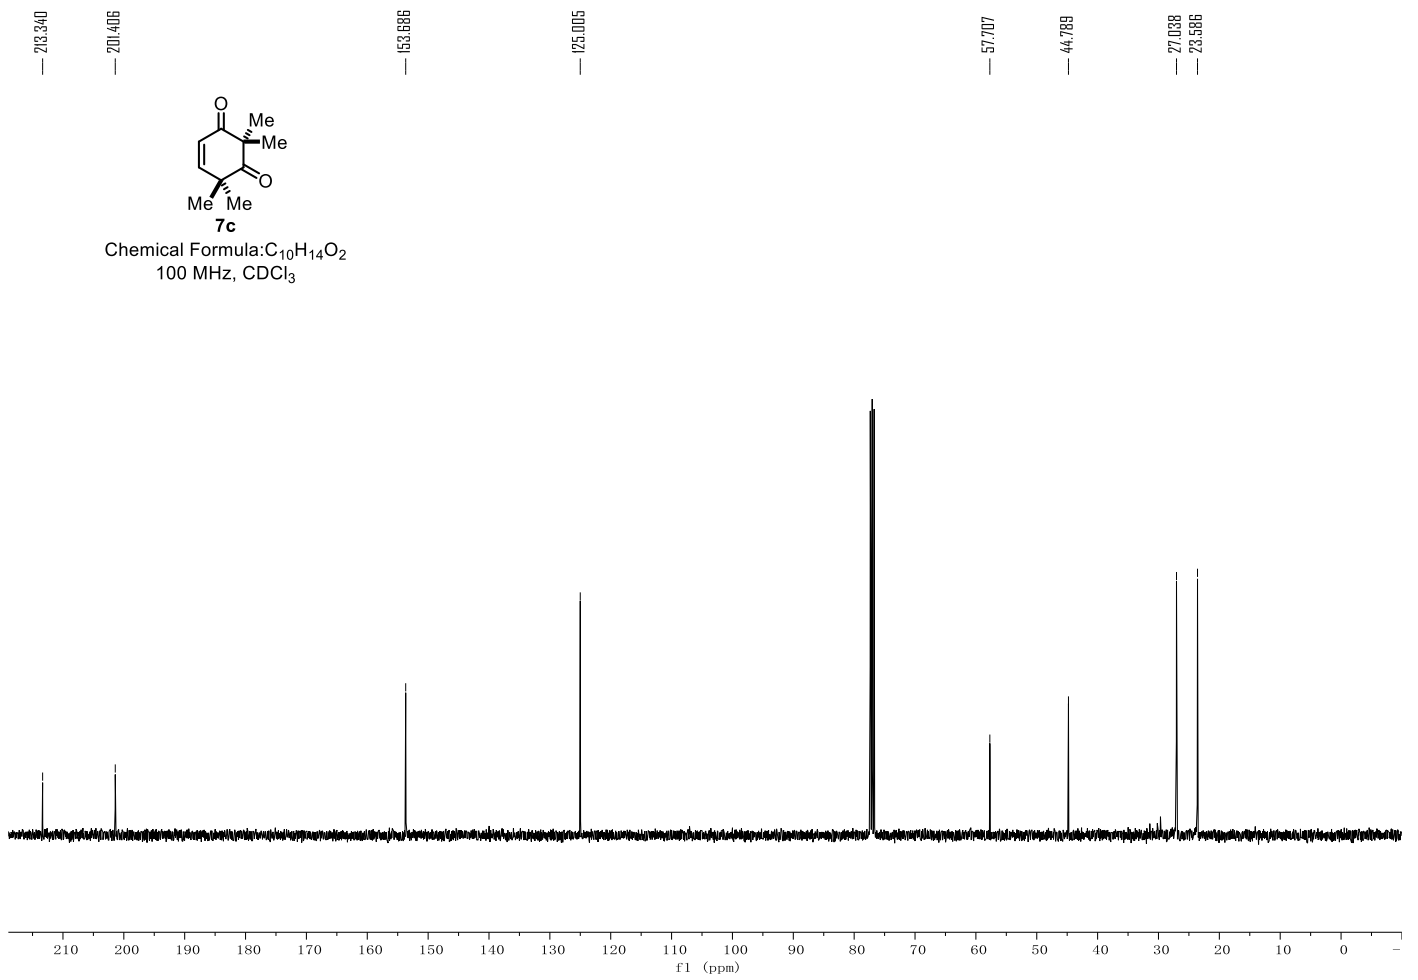

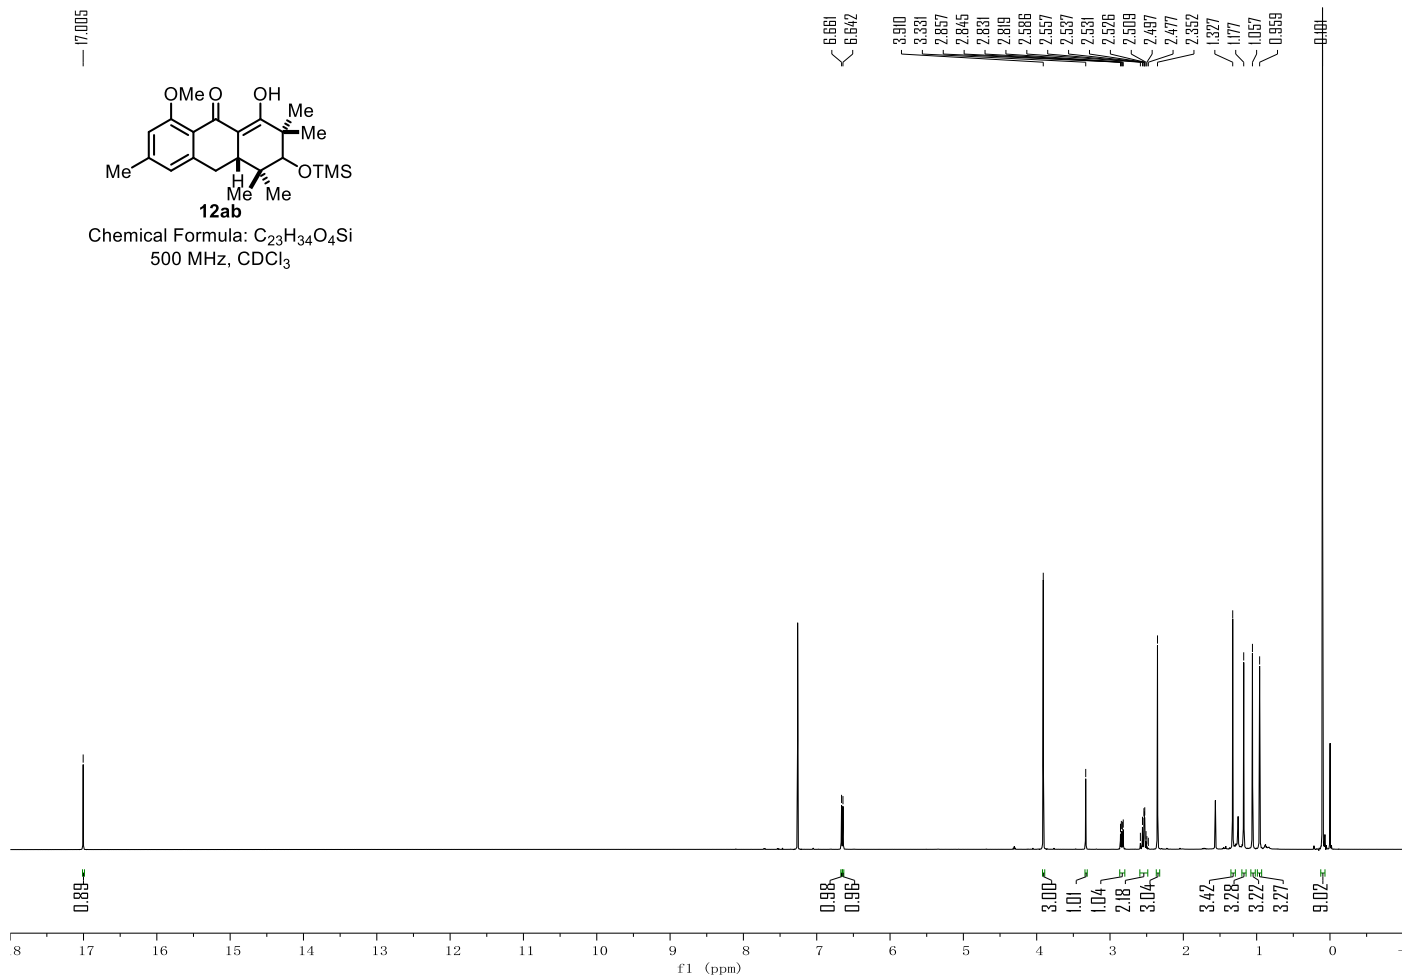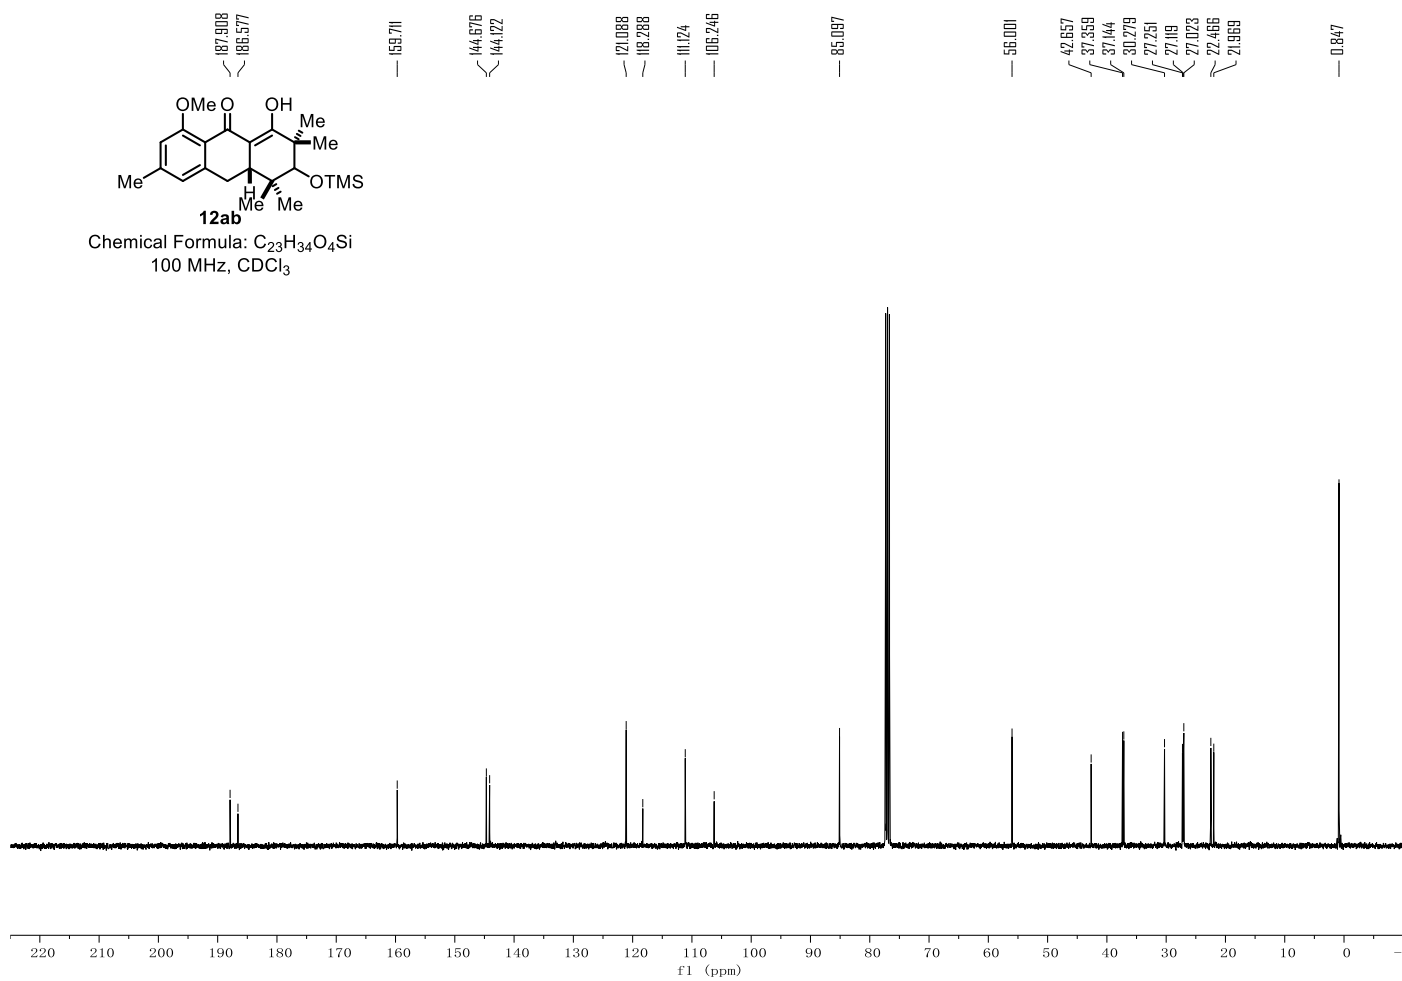

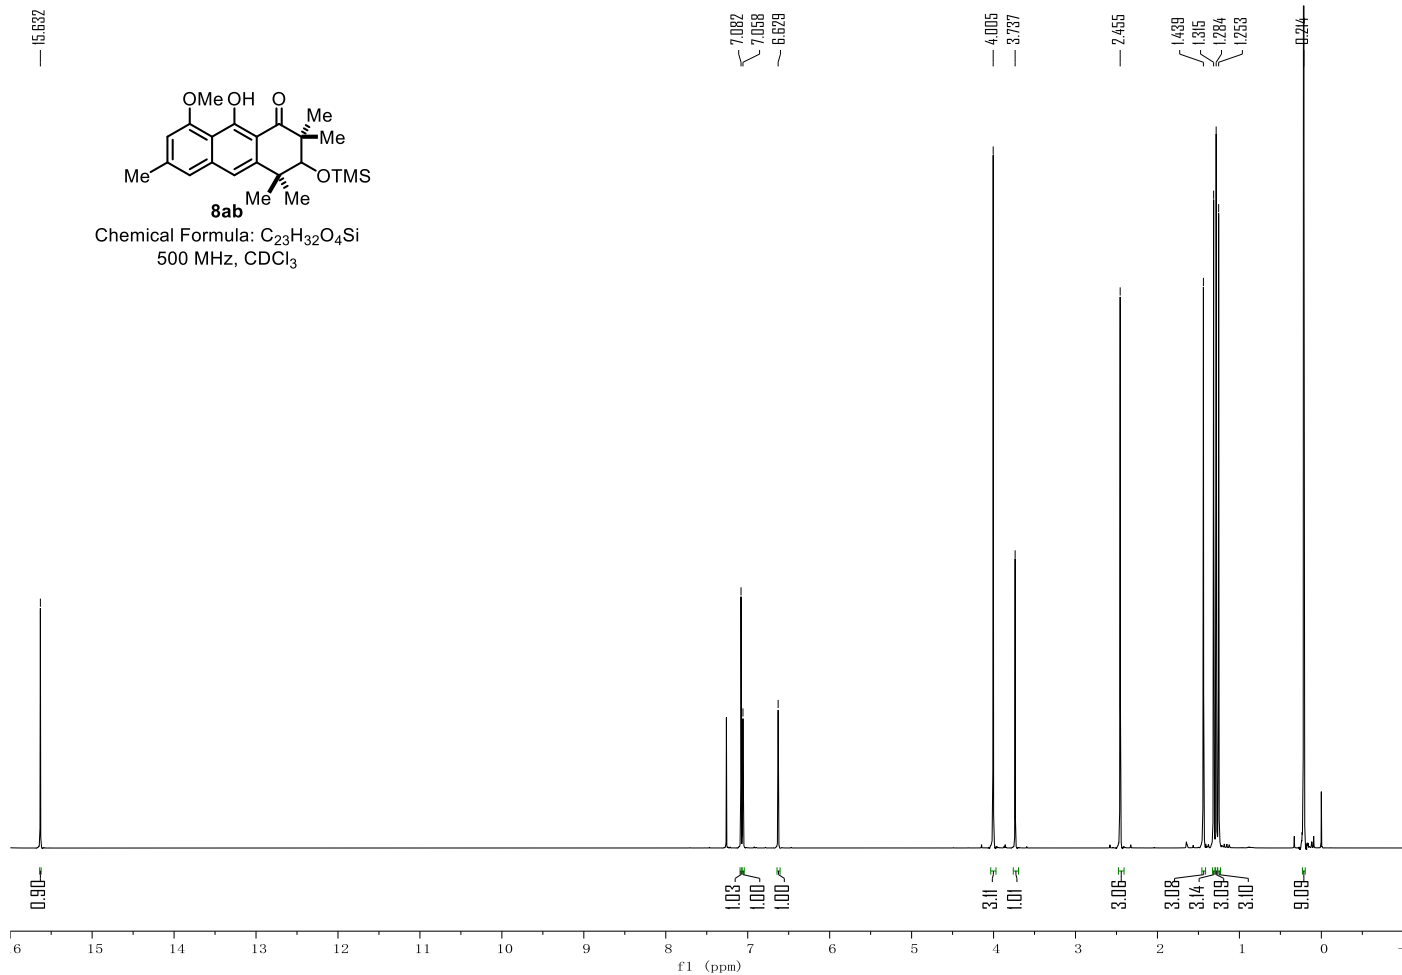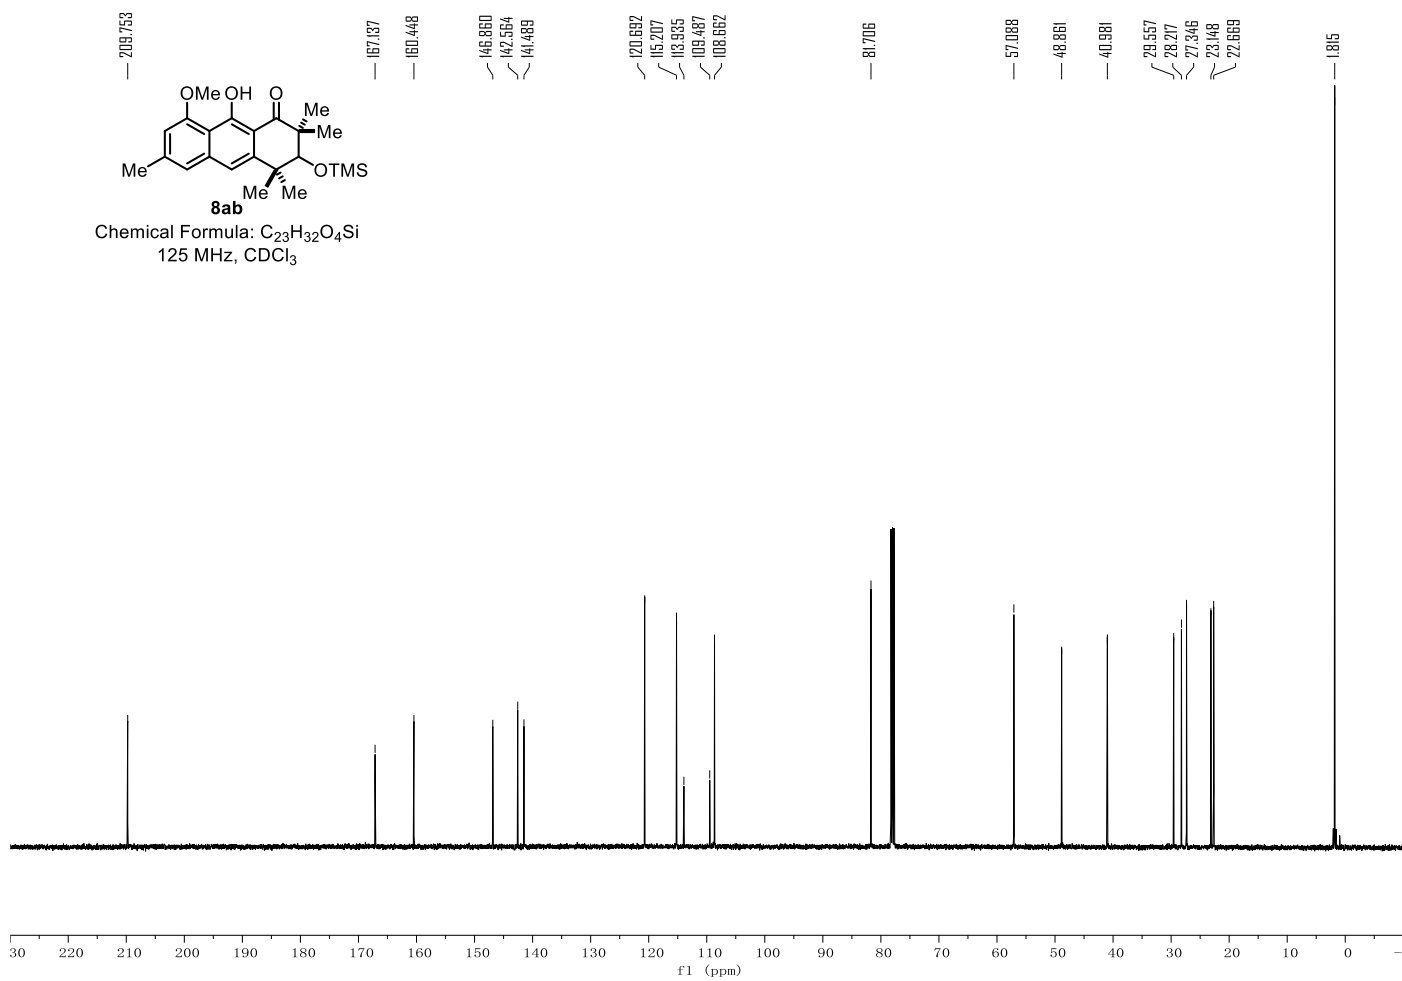

16.973

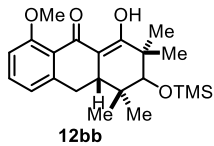

Chemical Formula: C<sub>22</sub>H<sub>32</sub>O<sub>4</sub>Si  
 400 MHz, CDCl<sub>3</sub>

7.354  
7.335  
7.314  
6.860  
6.839  
6.814  
6.796

3.912  
3.340  
2.886  
2.864  
2.839  
2.585  
2.563

1.330  
1.080  
1.064  
0.958

0.002

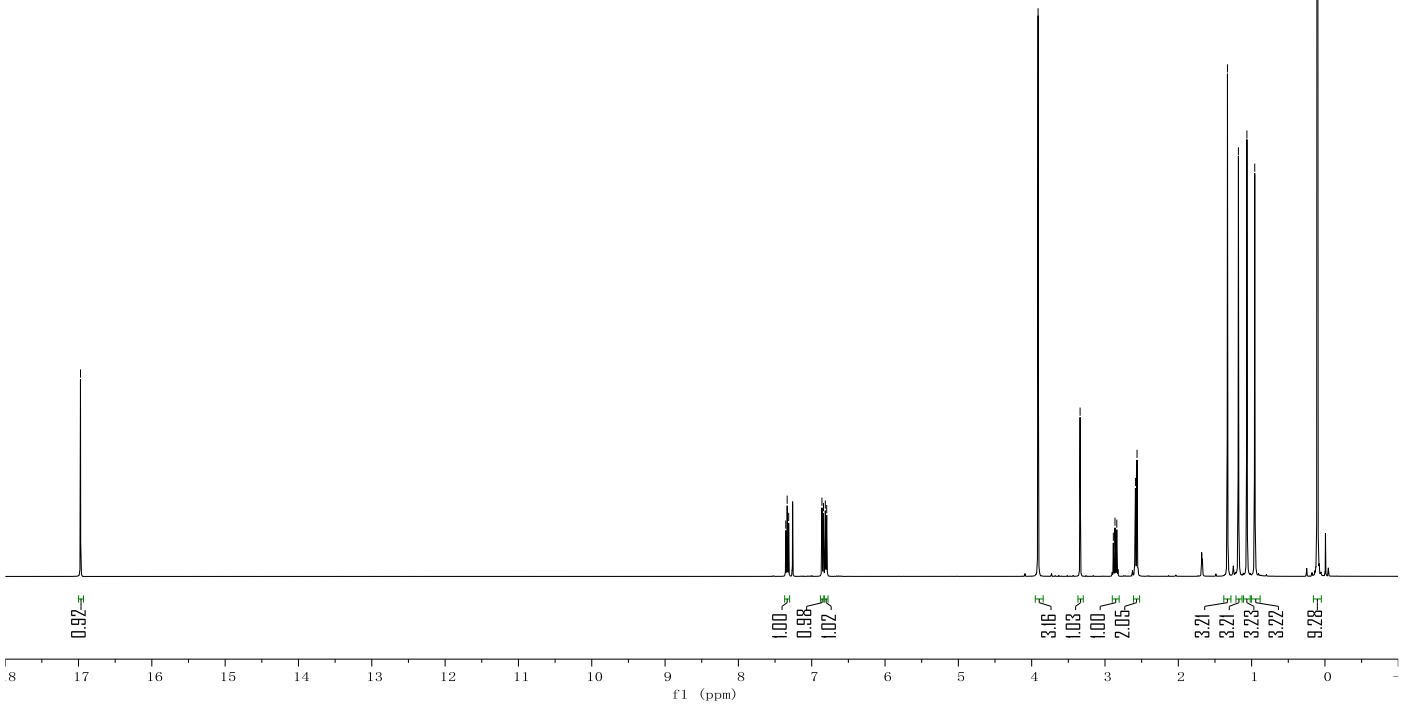

88.877  
88.187

159.569

144.668

133.068

120.681  
120.191

110.855

106.475

85.043

56.031

42.755

37.233

37.077

30.240

27.274

27.185

27.080

22.411

0.831

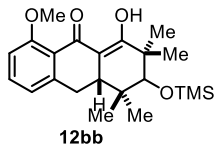

Chemical Formula: C<sub>22</sub>H<sub>32</sub>O<sub>4</sub>Si  
 100 MHz, CDCl<sub>3</sub>

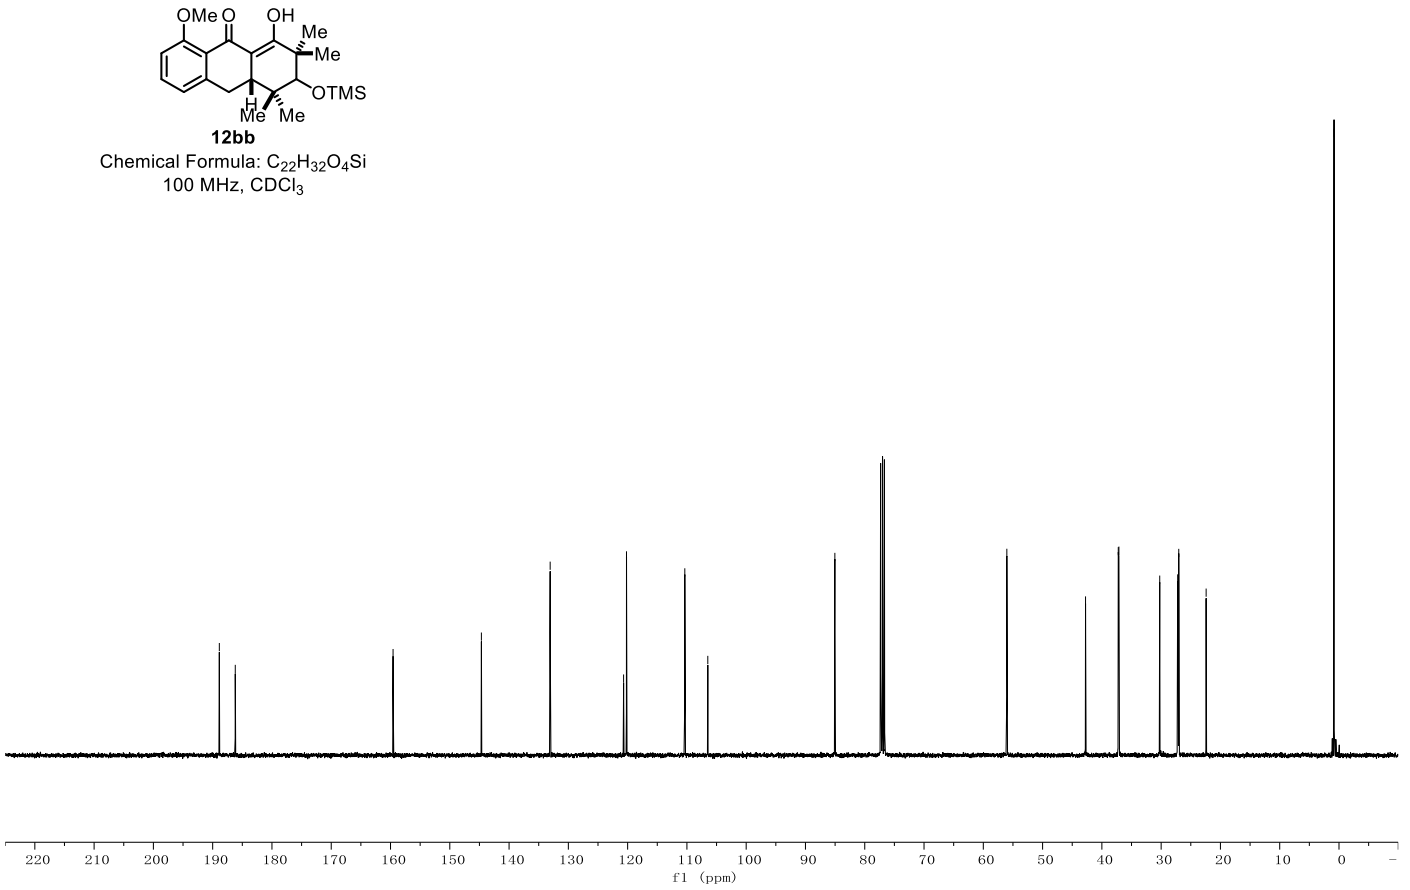

15.579

7.455  
7.475  
7.455  
7.267  
7.247  
7.174  
6.815  
6.794

4.018  
3.747

1.455  
1.321  
1.294  
1.267

0.277

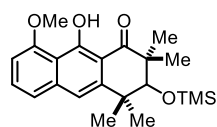

**8bb**

Chemical Formula: C<sub>22</sub>H<sub>30</sub>O<sub>4</sub>Si  
400 MHz, CDCl<sub>3</sub>

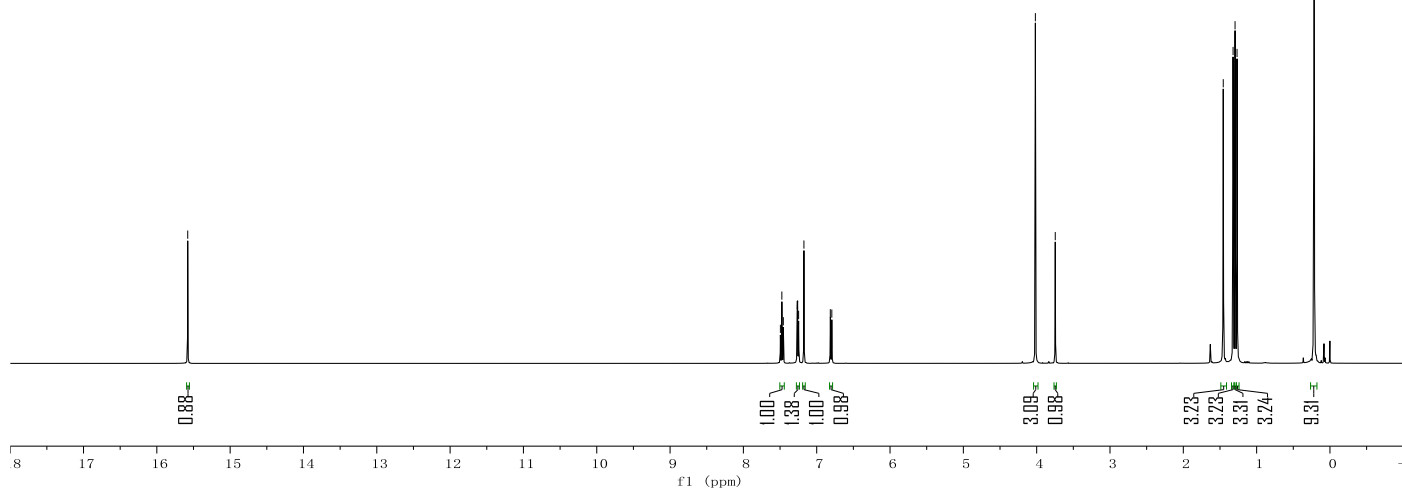

209.115

166.047  
158.654

145.778  
140.327

130.836

120.149  
114.888  
114.723  
108.989  
105.679

80.726

56.166

48.002

40.033

28.588  
27.270  
26.404  
21.715

0.820

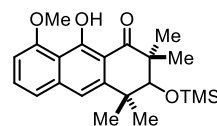

**8bb**

Chemical Formula: C<sub>22</sub>H<sub>30</sub>O<sub>4</sub>Si  
100 MHz, CDCl<sub>3</sub>

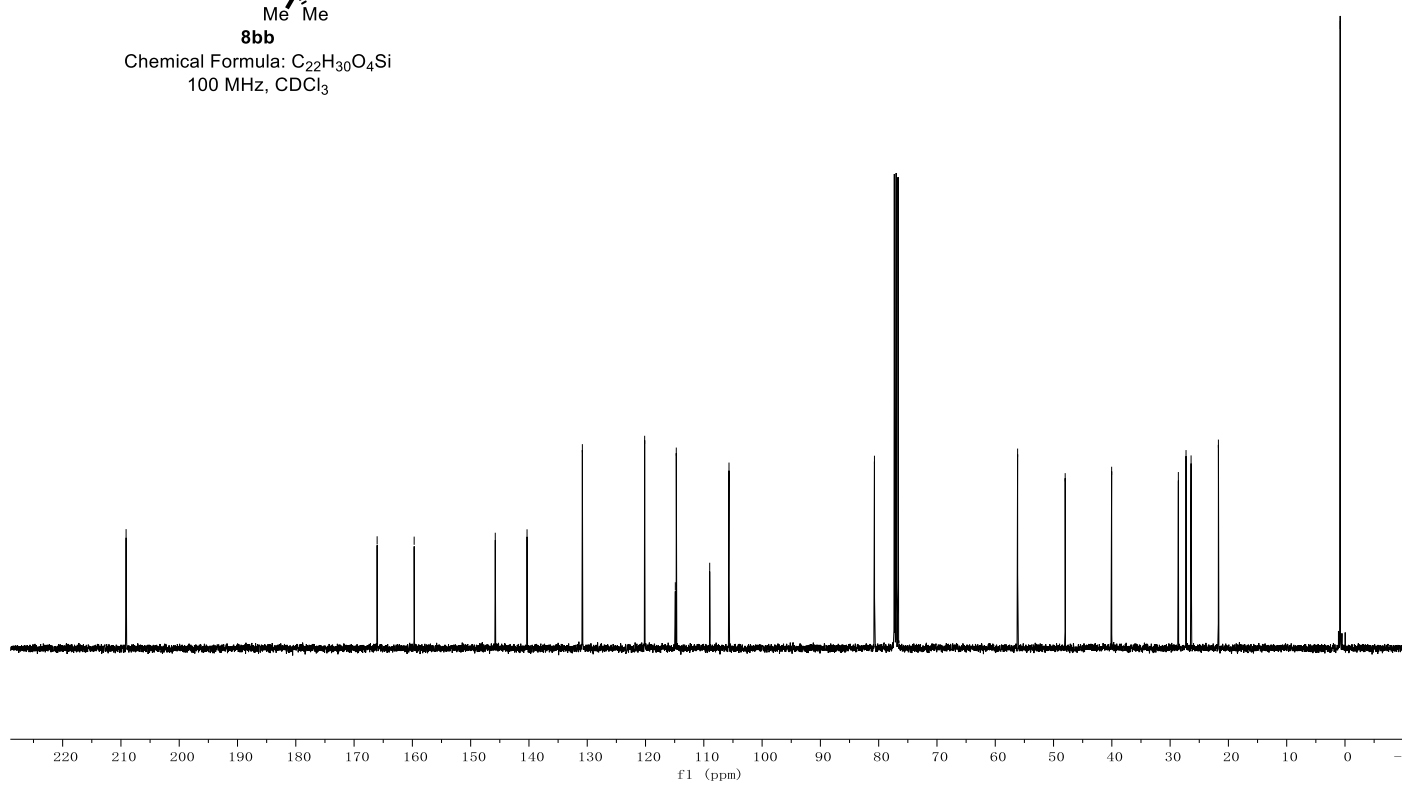

16.906

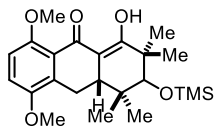

**12cb**

Chemical Formula:  $C_{23}H_{34}O_5Si$   
400 MHz,  $CDCl_3$

6.968  
6.946  
6.801  
6.788  
3.878  
3.817  
3.349  
3.110  
3.059  
3.072  
3.061  
2.796  
2.786  
2.760  
2.749  
2.156  
2.118  
2.081  
1.833  
1.82  
1.091  
0.980  
0.106

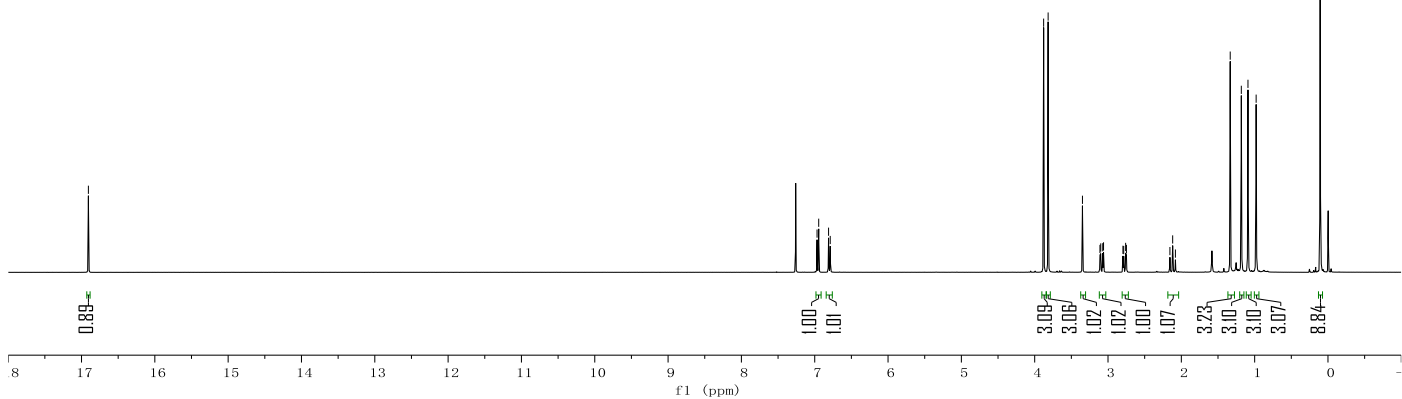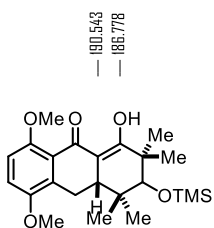

**12cb**

Chemical Formula:  $C_{23}H_{34}O_5Si$   
100 MHz,  $CDCl_3$

190.543  
186.778  
154.712  
150.703  
133.910  
122.852  
116.244  
111.816  
107.519  
86.151  
57.497  
57.223  
43.883  
38.297  
37.818  
28.245  
28.137  
28.098  
23.575  
22.889  
1.870

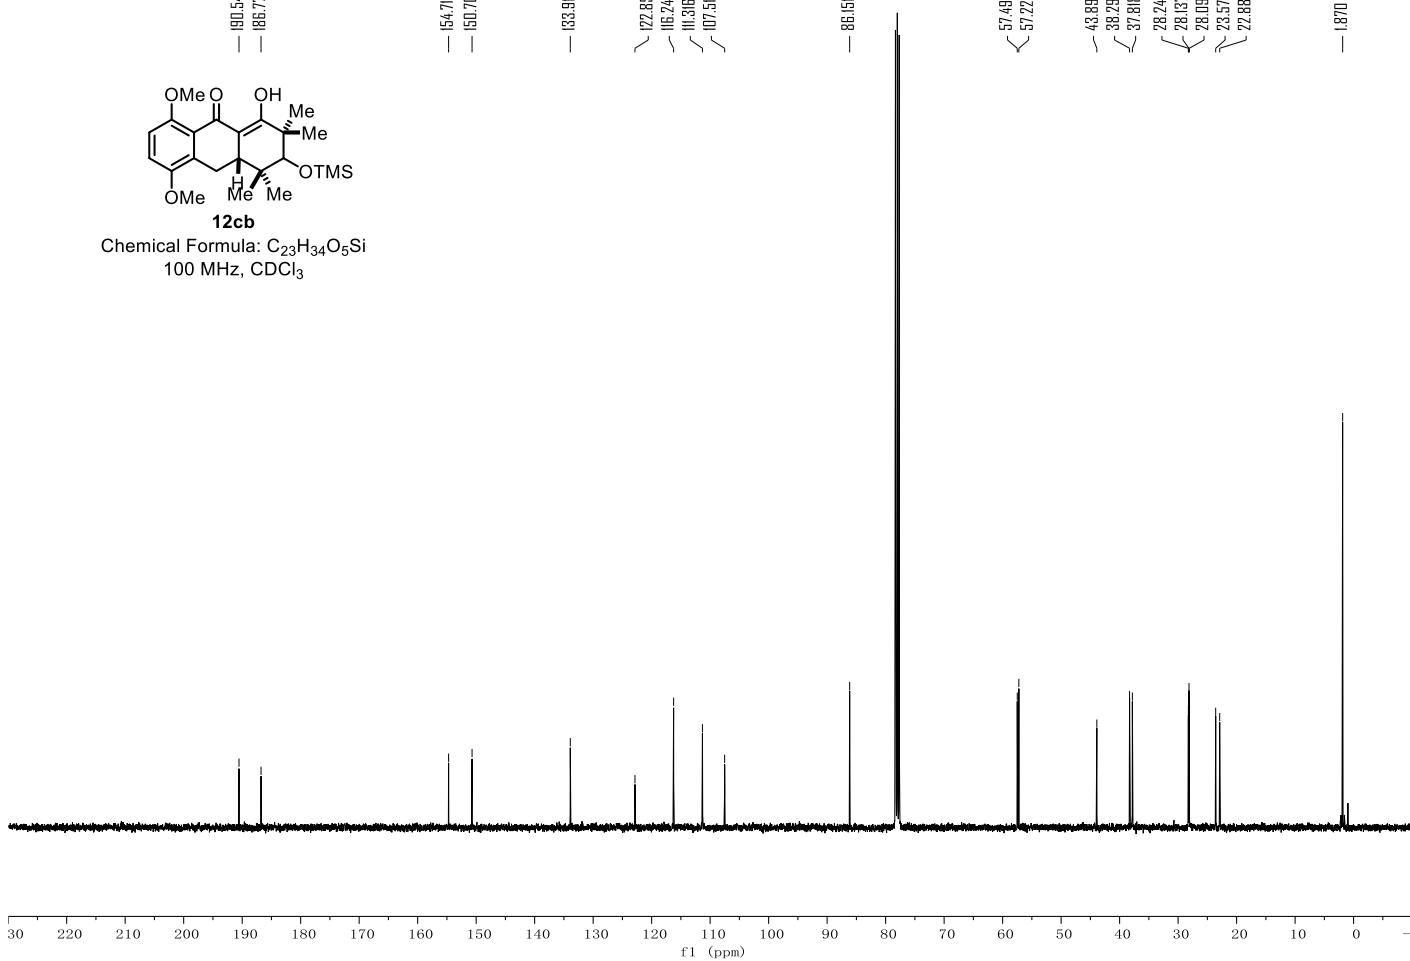



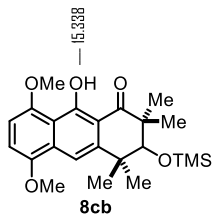

Chemical Formula: C<sub>23</sub>H<sub>32</sub>O<sub>5</sub>Si  
400 MHz, CDCl<sub>3</sub>

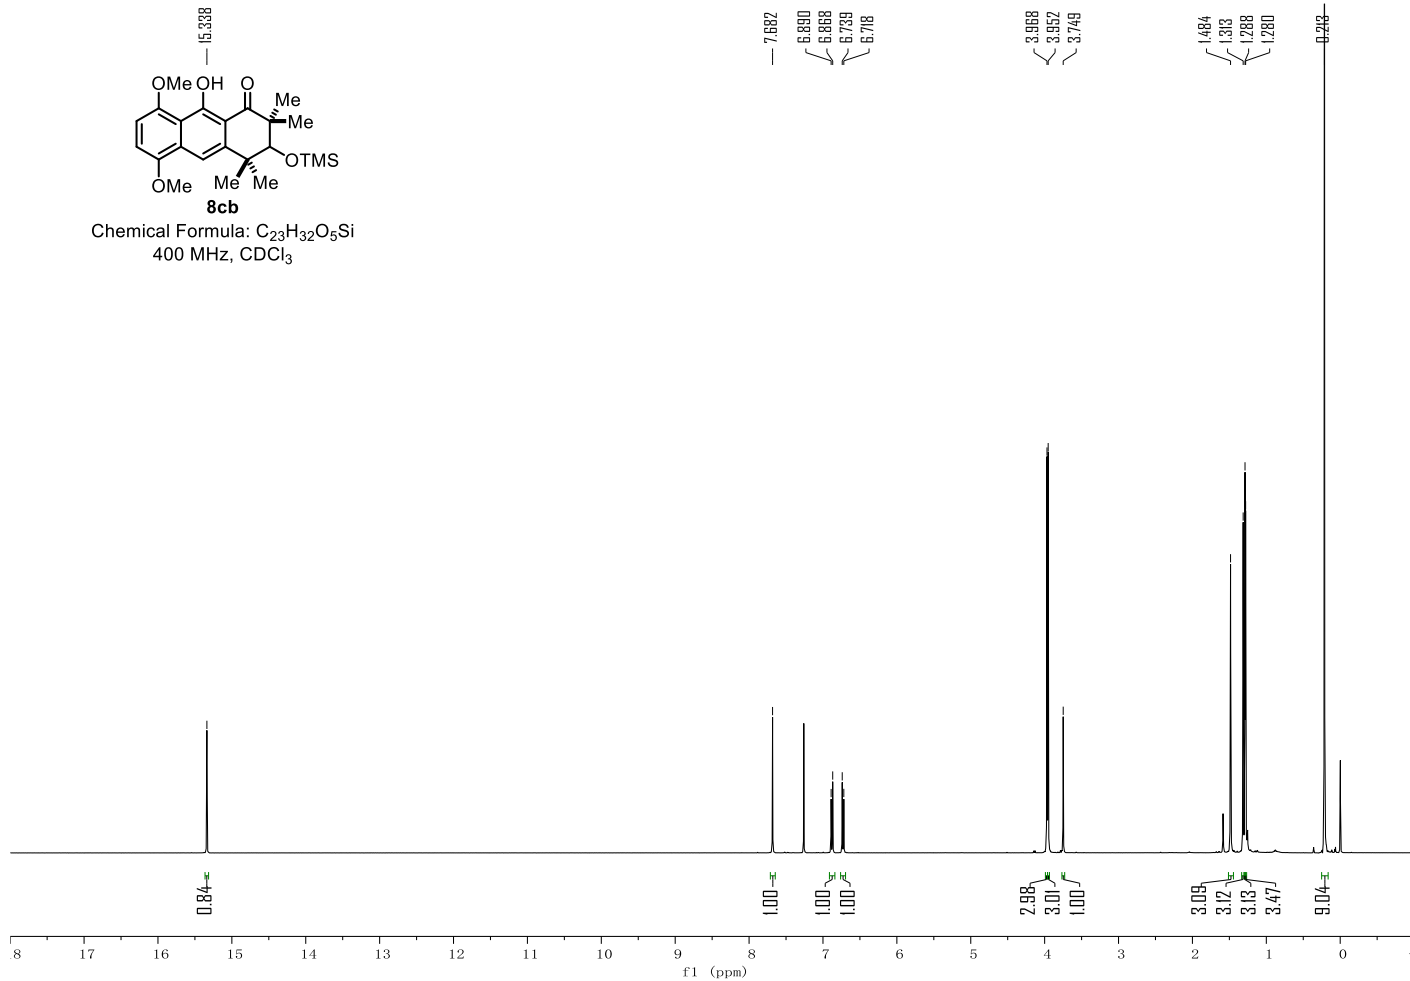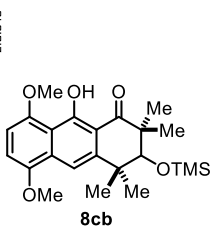

Chemical Formula: C<sub>23</sub>H<sub>32</sub>O<sub>5</sub>Si  
100 MHz, CDCl<sub>3</sub>

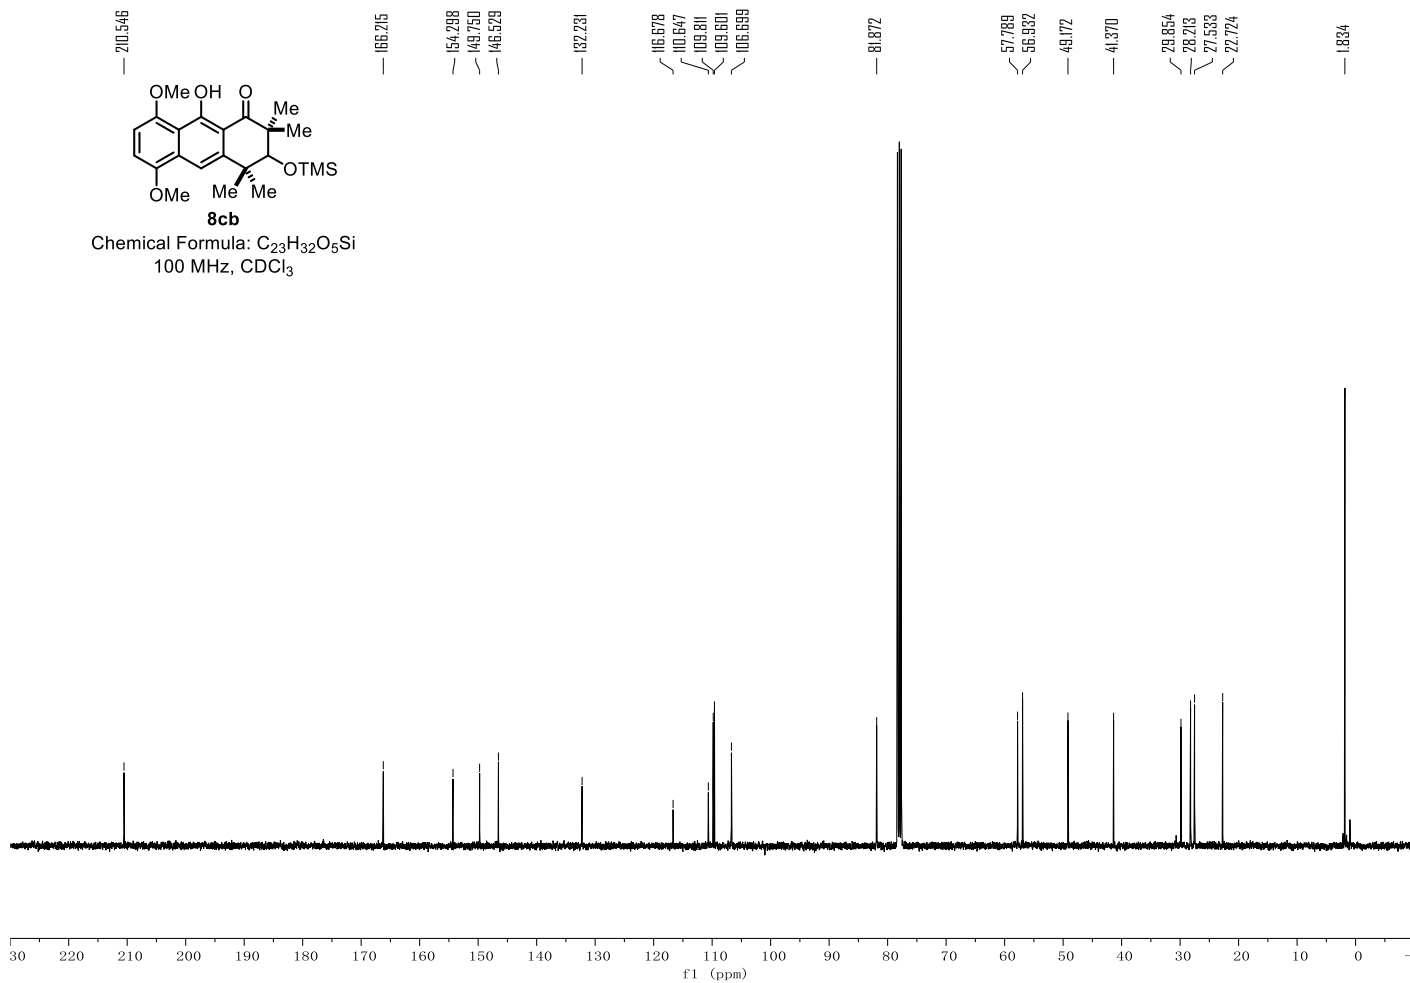

17.001

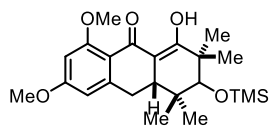

Chemical Formula:  $C_{23}H_{34}O_5Si$   
400 MHz,  $CDCl_3$

6.366  
6.361  
6.340  
6.335  
3.883  
3.845  
3.823  
2.854  
2.841  
2.820  
2.807  
2.565  
2.580  
2.546  
2.533  
2.510  
2.487  
1.388  
1.173  
1.057  
0.956

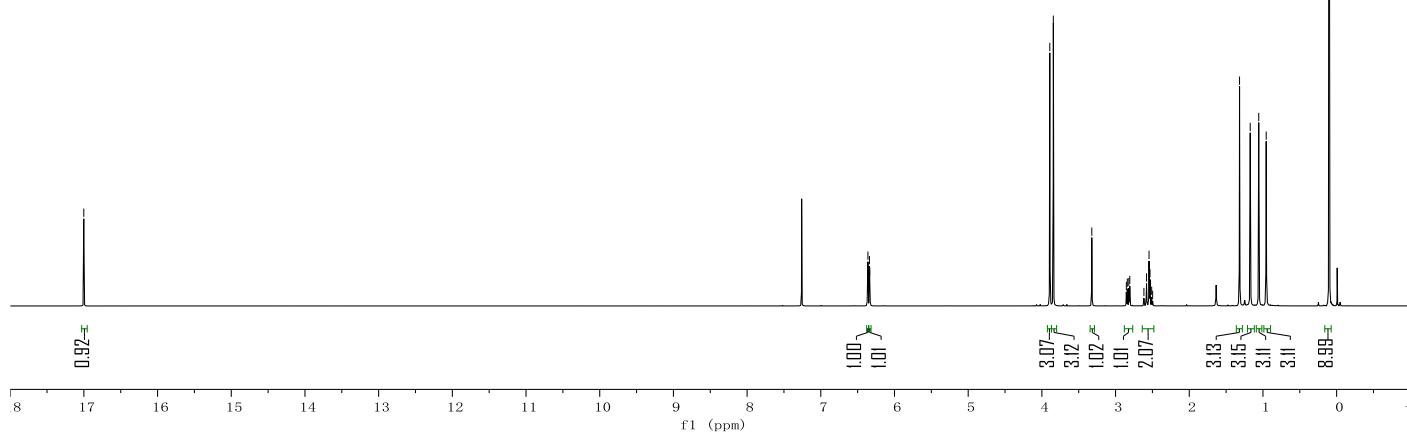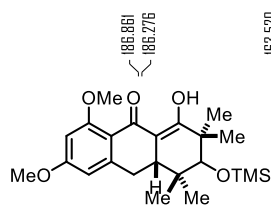

Chemical Formula:  $C_{23}H_{34}O_5Si$   
100 MHz,  $CDCl_3$

188.861  
186.276  
163.520  
161.642  
146.852  
114.581  
105.648  
104.697  
97.418  
85.084  
56.032  
55.980  
42.429  
37.284  
37.132  
30.963  
27.281  
27.073  
26.948  
22.494  
0.655

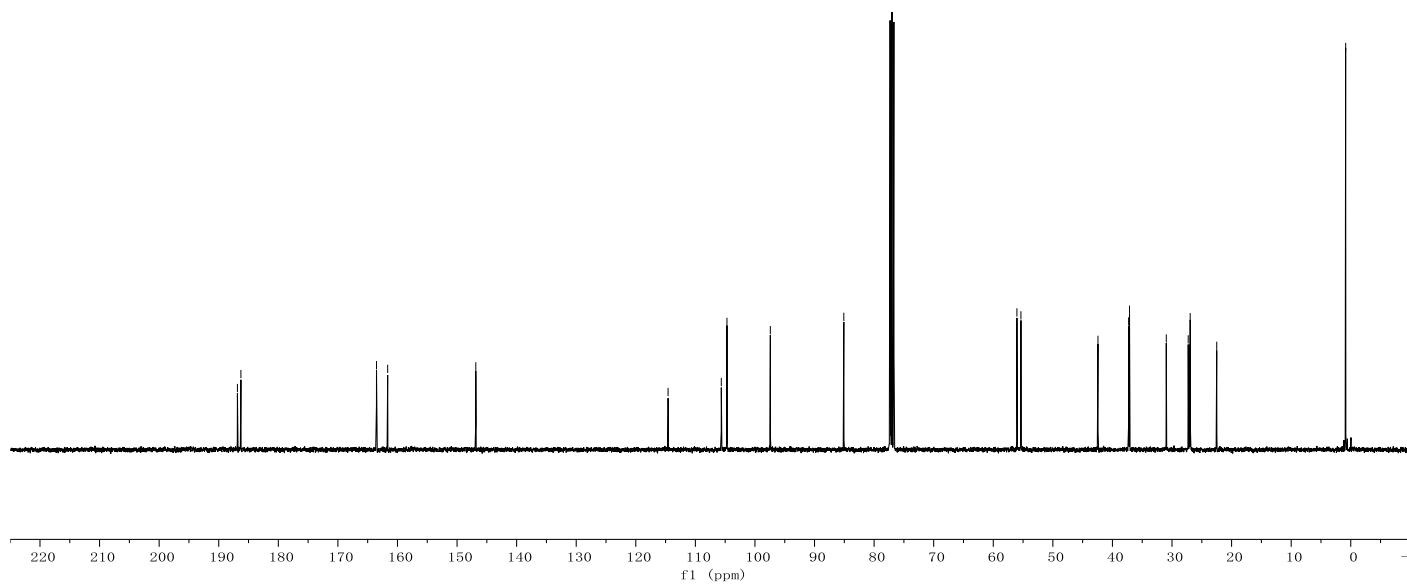

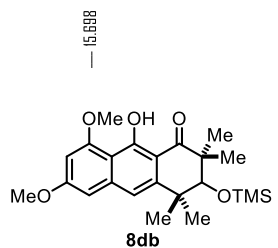

Chemical Formula: C<sub>23</sub>H<sub>32</sub>O<sub>5</sub>Si  
400 MHz, CDCl<sub>3</sub>

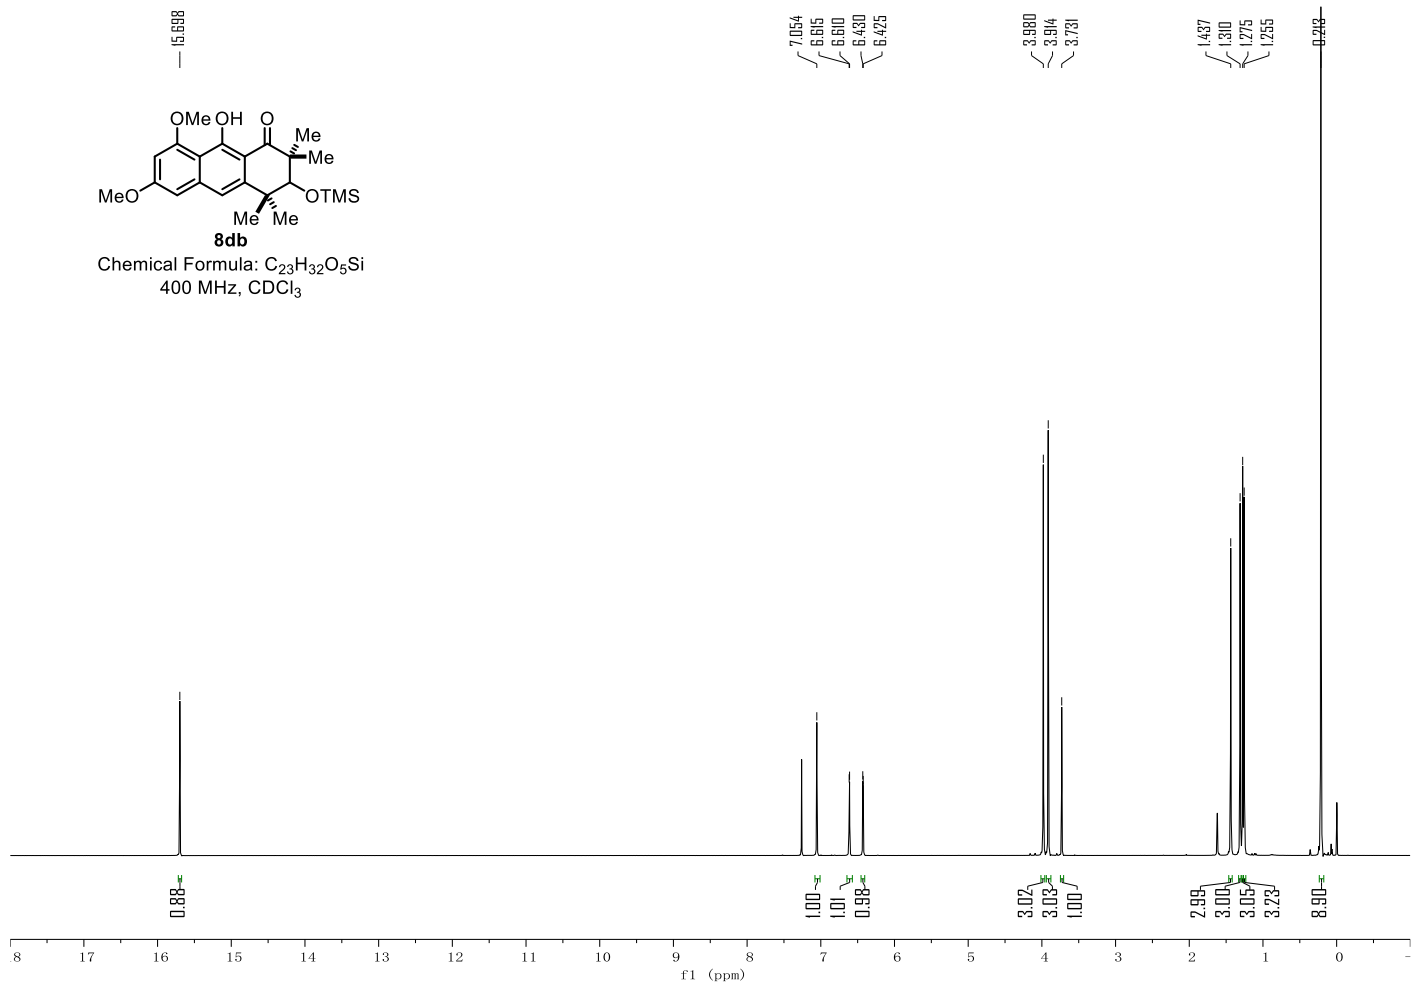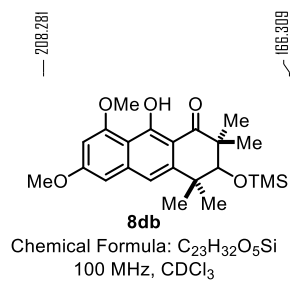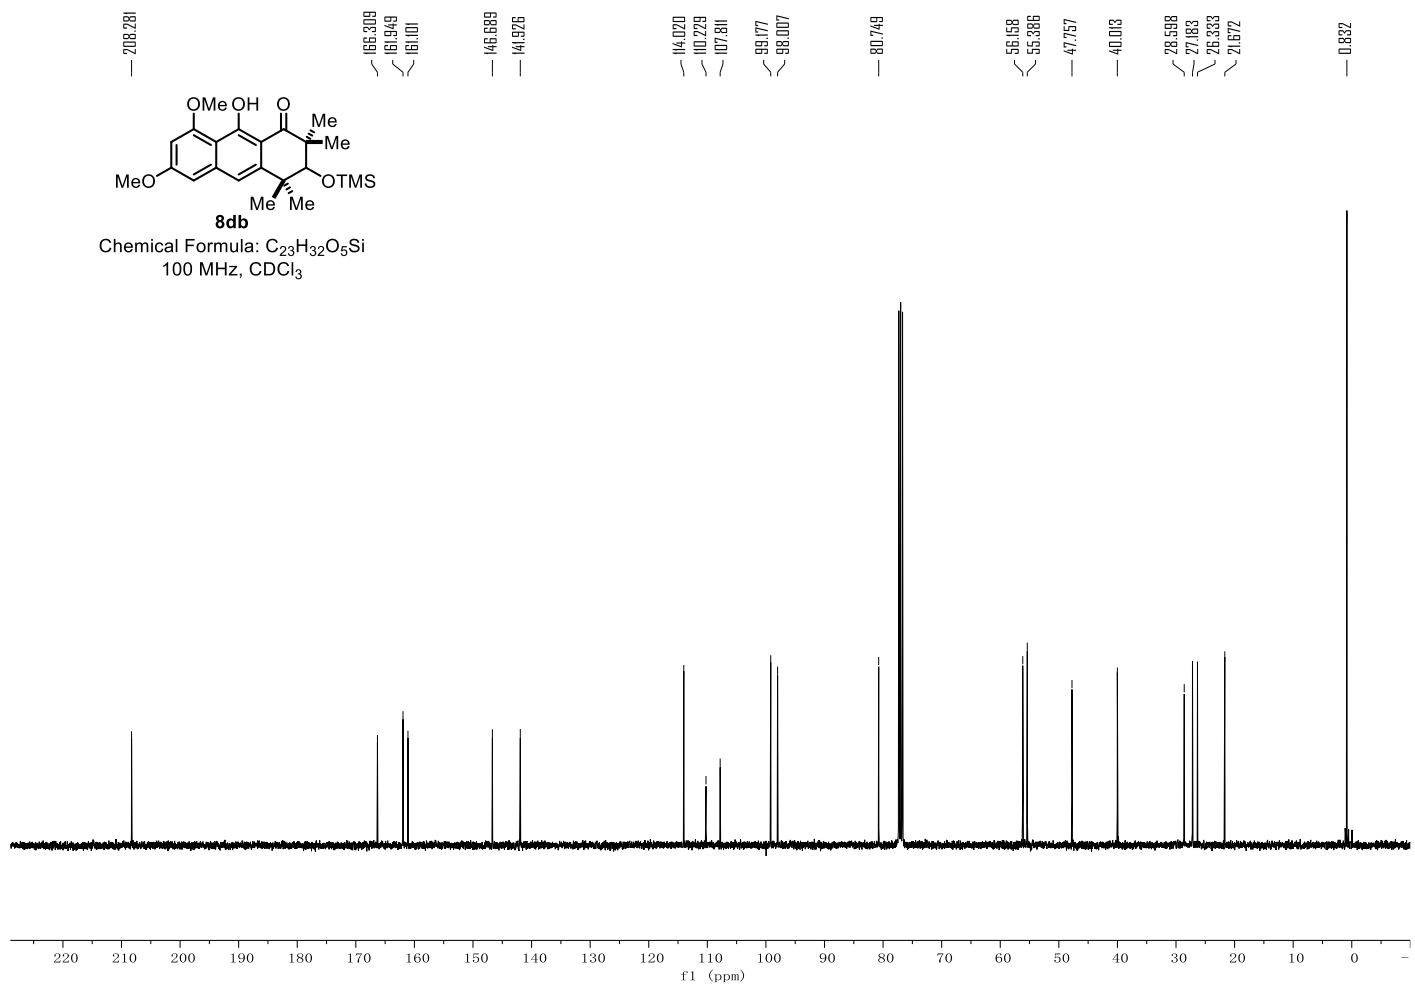

16.972

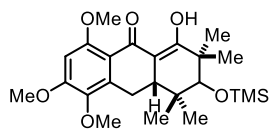

**12eb**

Chemical Formula: C<sub>24</sub>H<sub>36</sub>O<sub>6</sub>Si  
400 MHz, CDCl<sub>3</sub>

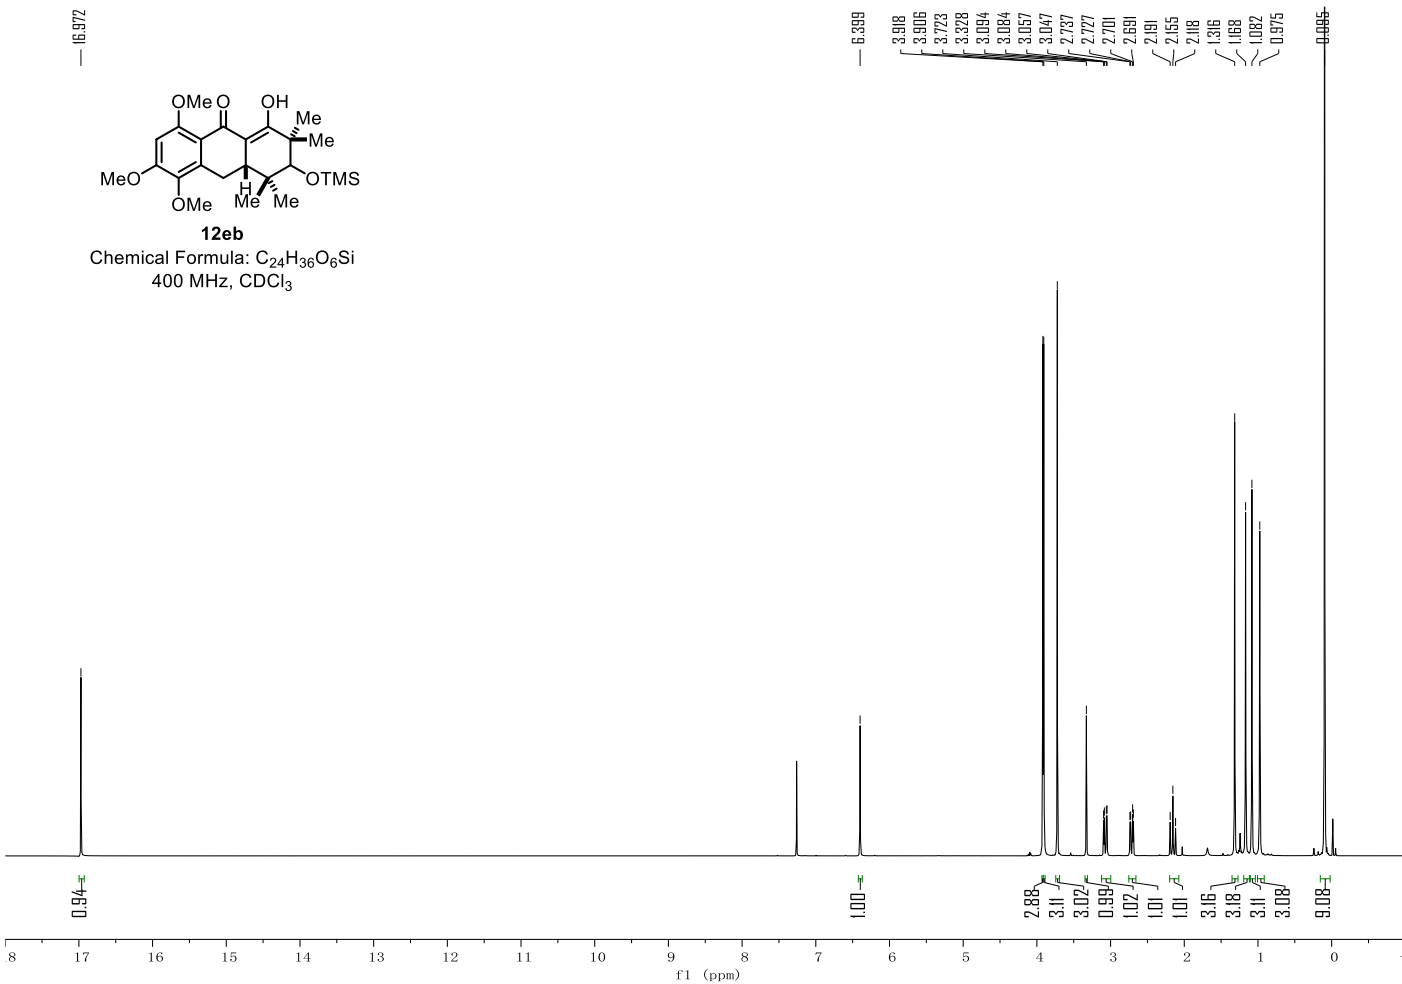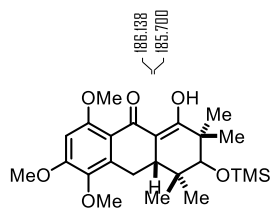

**12eb**

100 MHz, CDCl<sub>3</sub>

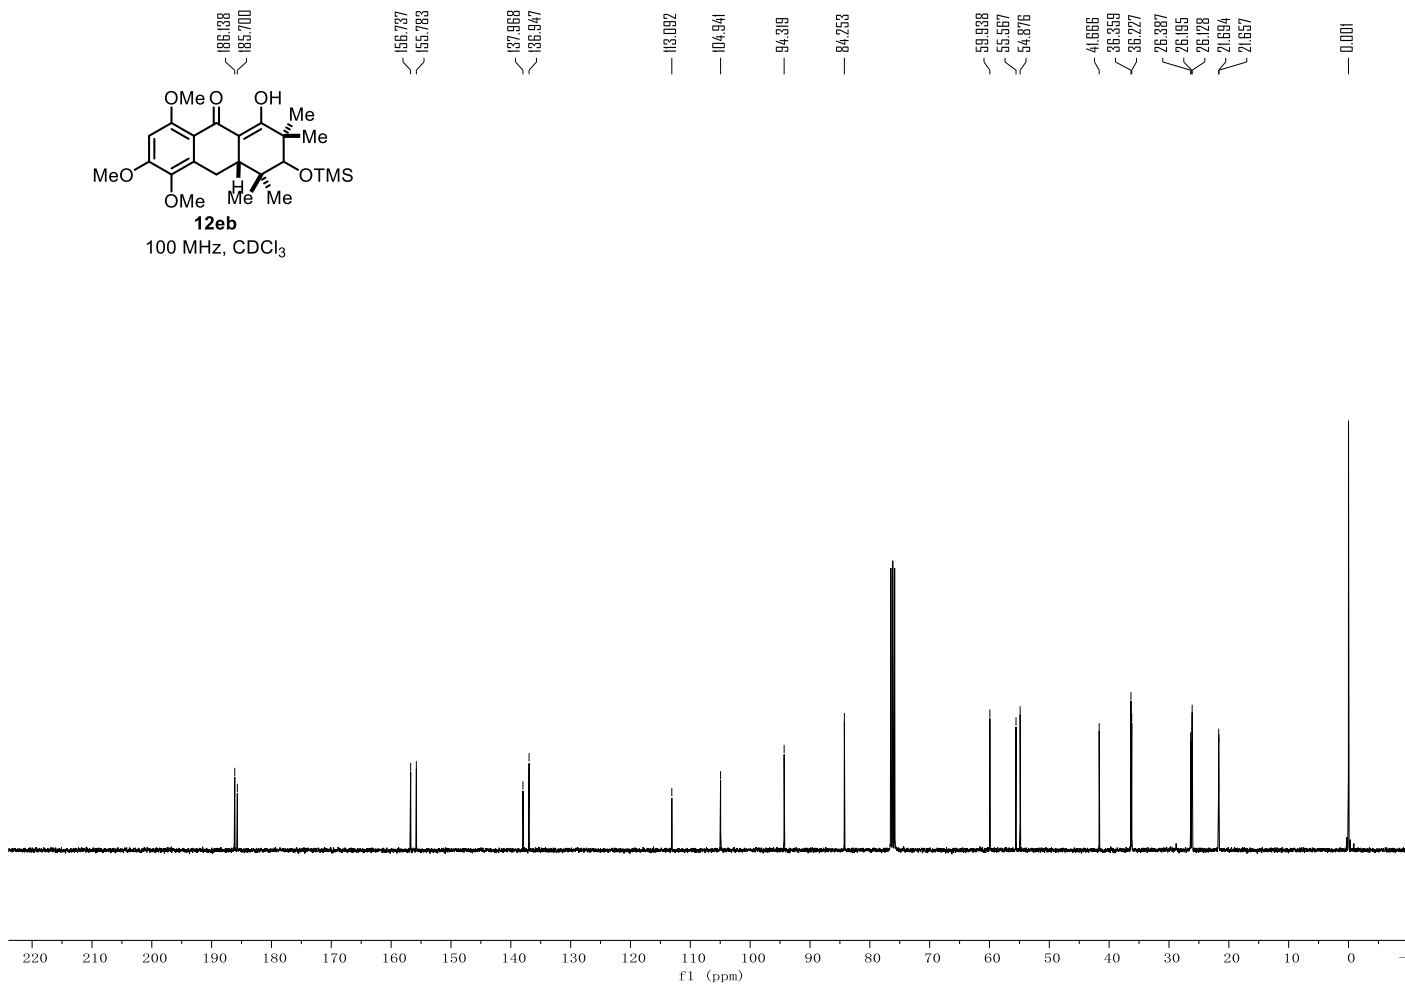

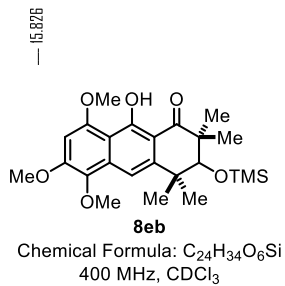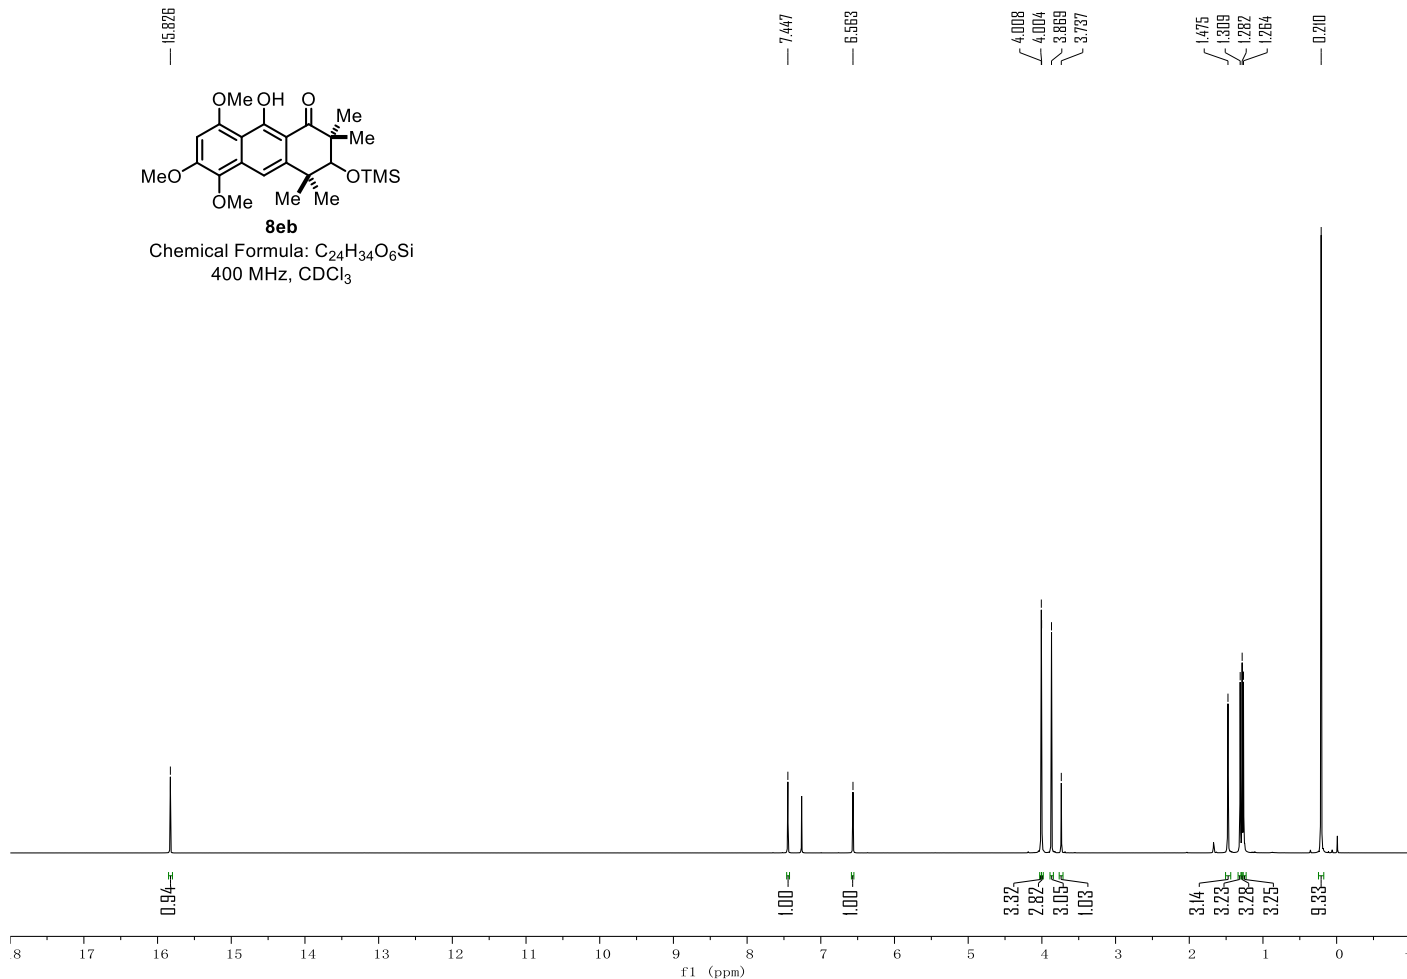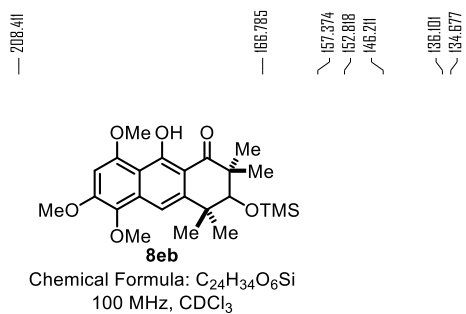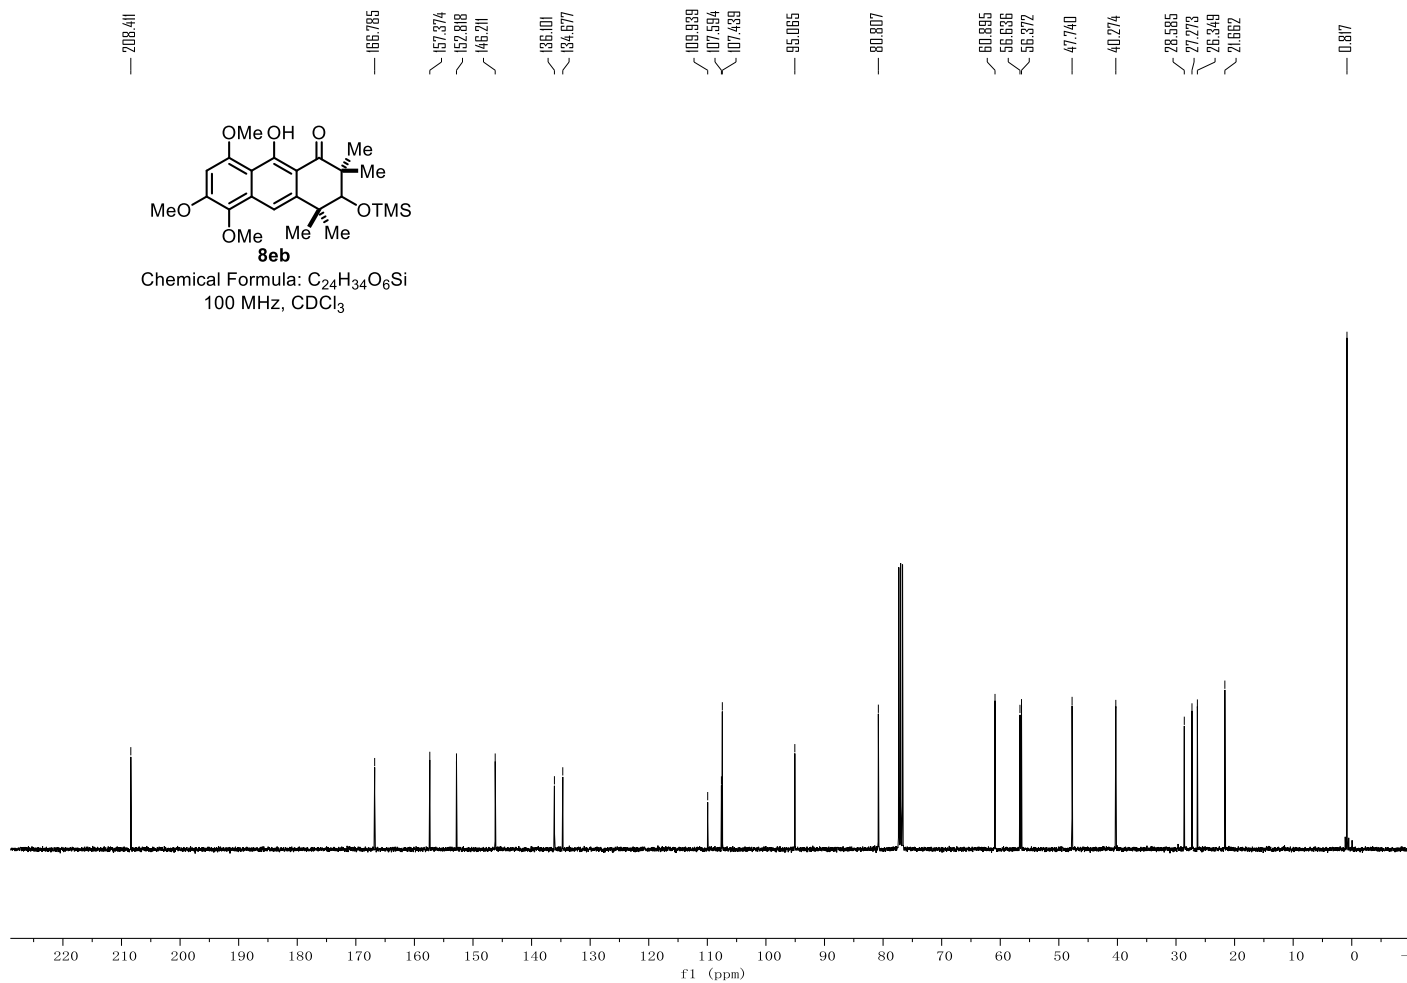

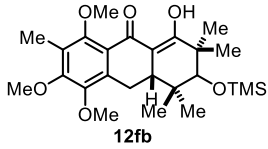

Chemical Formula: C<sub>25</sub>H<sub>38</sub>O<sub>6</sub>Si  
400 MHz, CDCl<sub>3</sub>

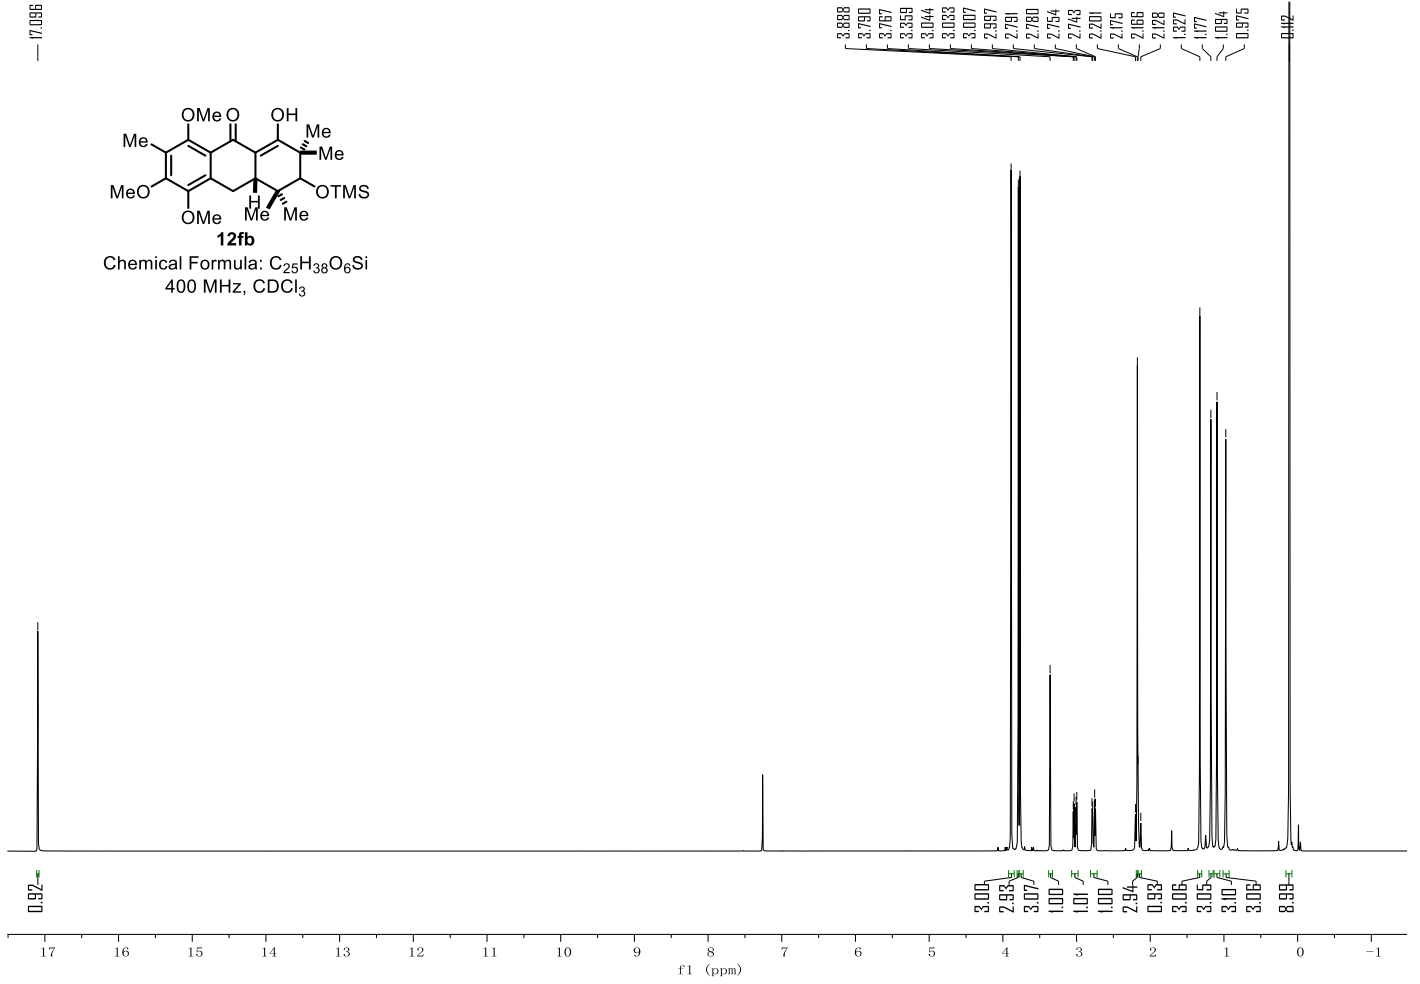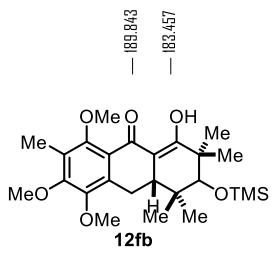

Chemical Formula: C<sub>25</sub>H<sub>38</sub>O<sub>6</sub>Si  
100 MHz, CDCl<sub>3</sub>

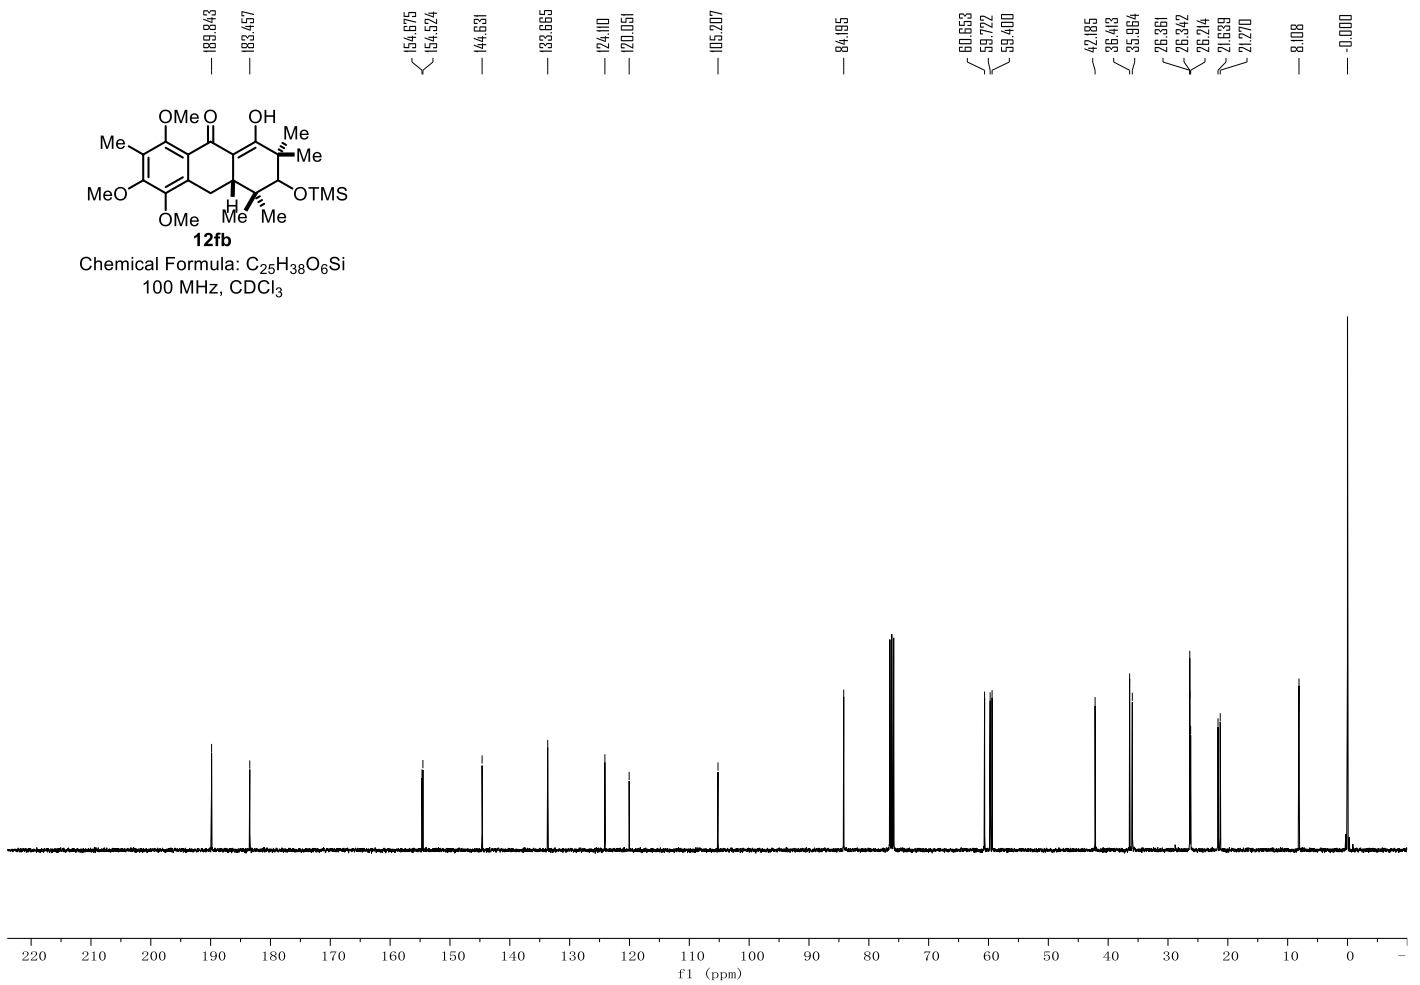

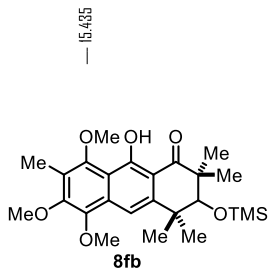

Chemical Formula: C<sub>25</sub>H<sub>36</sub>O<sub>6</sub>Si  
400 MHz, CDCl<sub>3</sub>

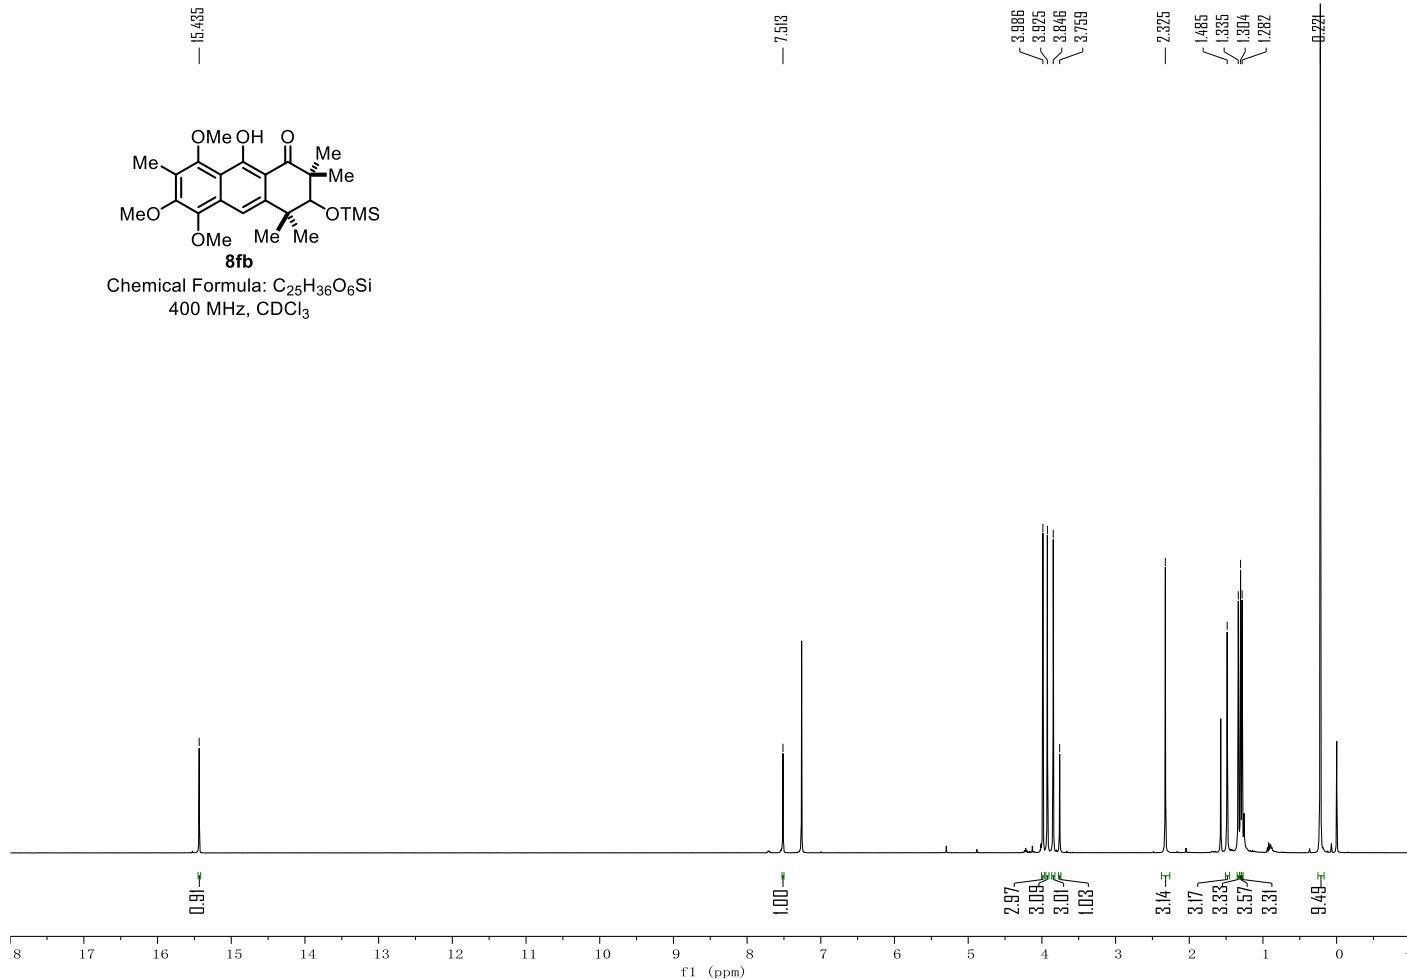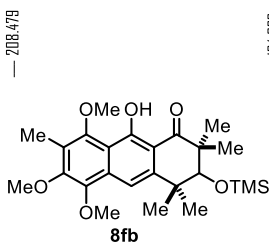

Chemical Formula: C<sub>25</sub>H<sub>36</sub>O<sub>6</sub>Si  
100 MHz, CDCl<sub>3</sub>

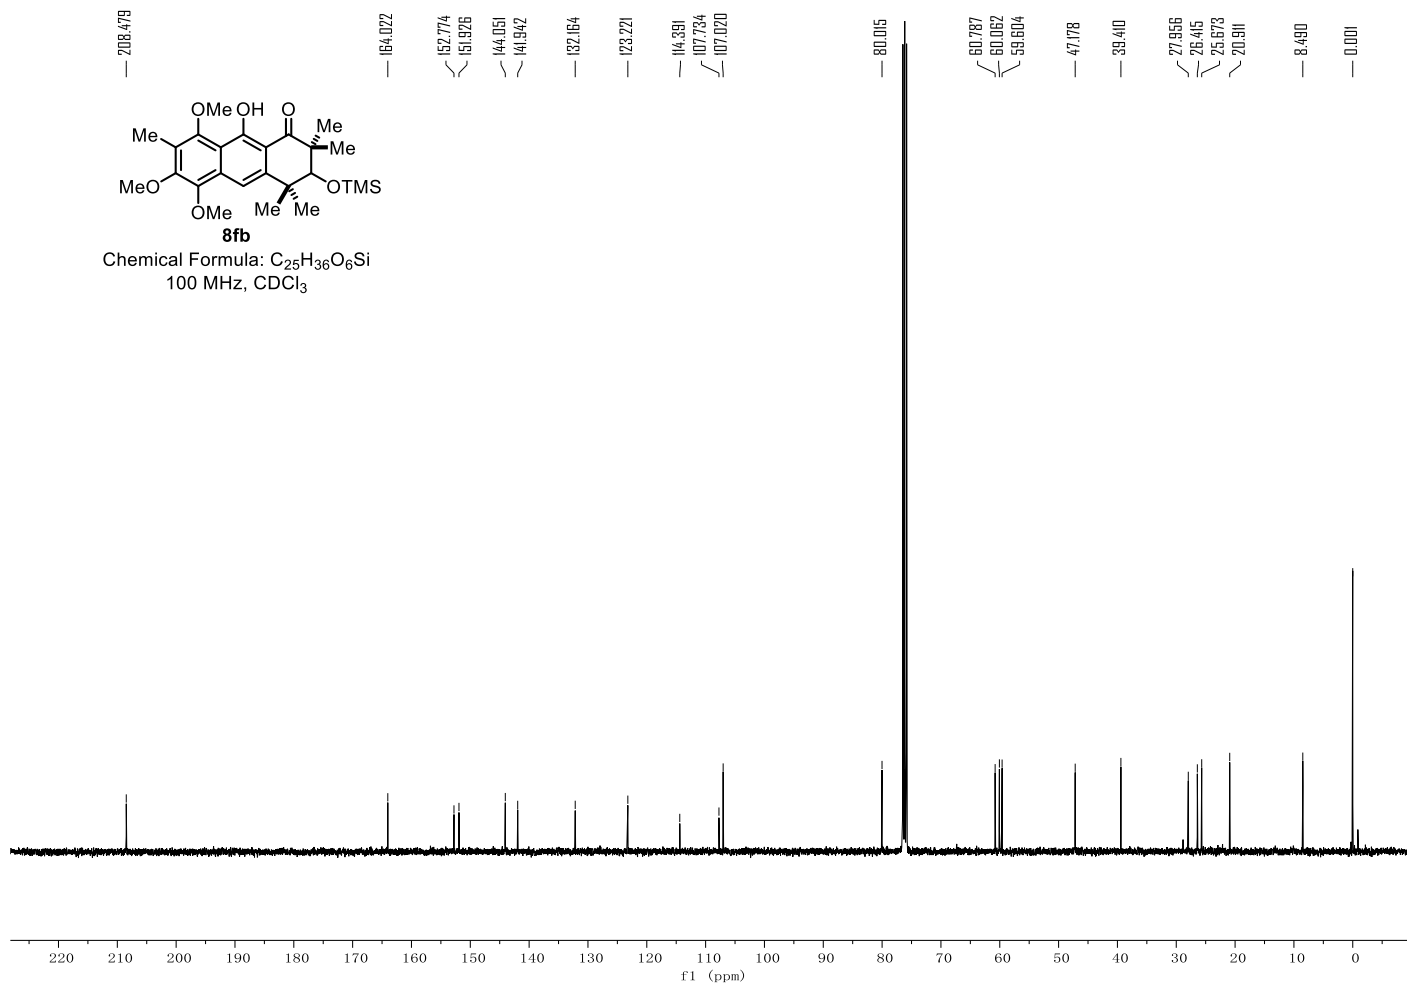

16.879

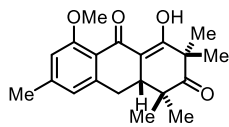

**12ac**

Chemical Formula: C<sub>20</sub>H<sub>24</sub>O<sub>4</sub>  
400 MHz, CDCl<sub>3</sub>

6.702  
6.673

3.934  
2.827  
2.806  
2.778  
2.755  
2.742  
2.737  
2.709  
2.693  
2.670  
2.666  
2.369  
1.448  
1.280  
1.234  
1.090

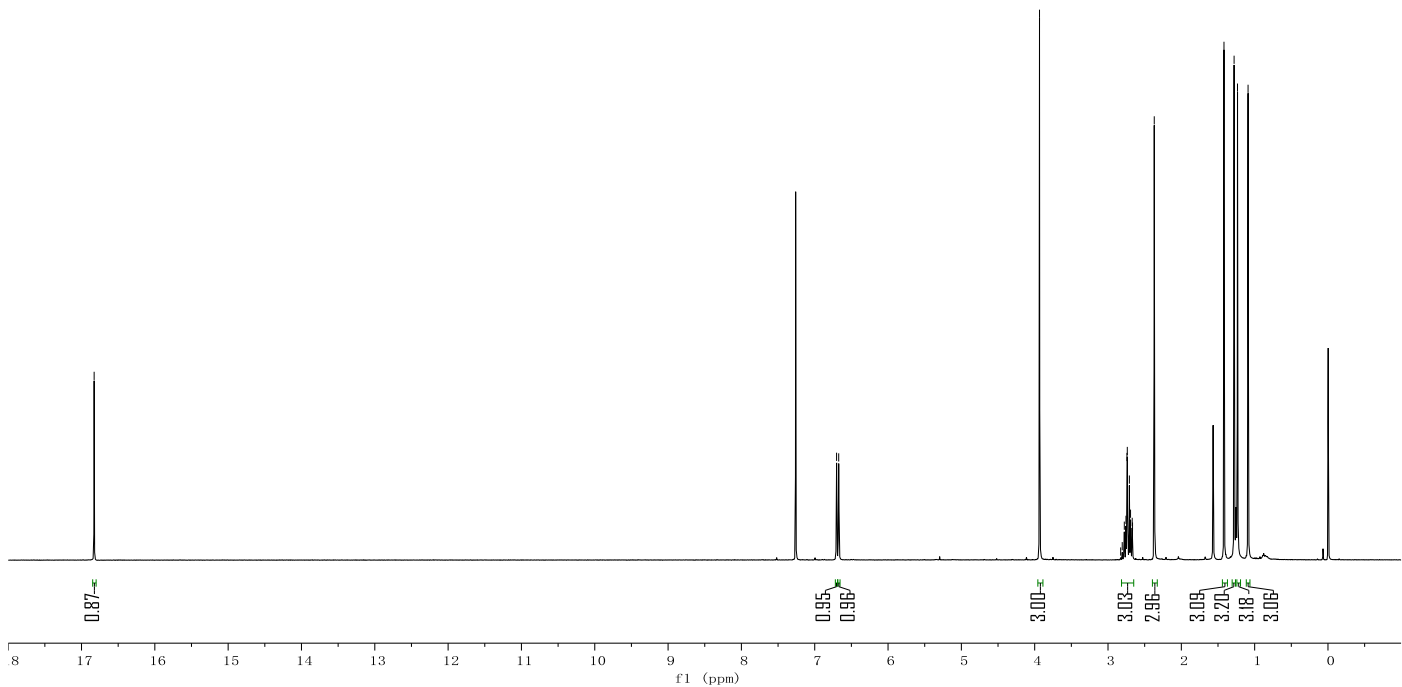

216.093

188.864

184.816

160.877

146.029

143.359

122.462

118.102

112.618

105.744

57.102

50.830

47.445

39.168

30.701

26.715

24.308

23.029

22.262

20.872

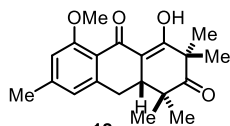

**12ac**

Chemical Formula: C<sub>20</sub>H<sub>24</sub>O<sub>4</sub>  
100 MHz, CDCl<sub>3</sub>

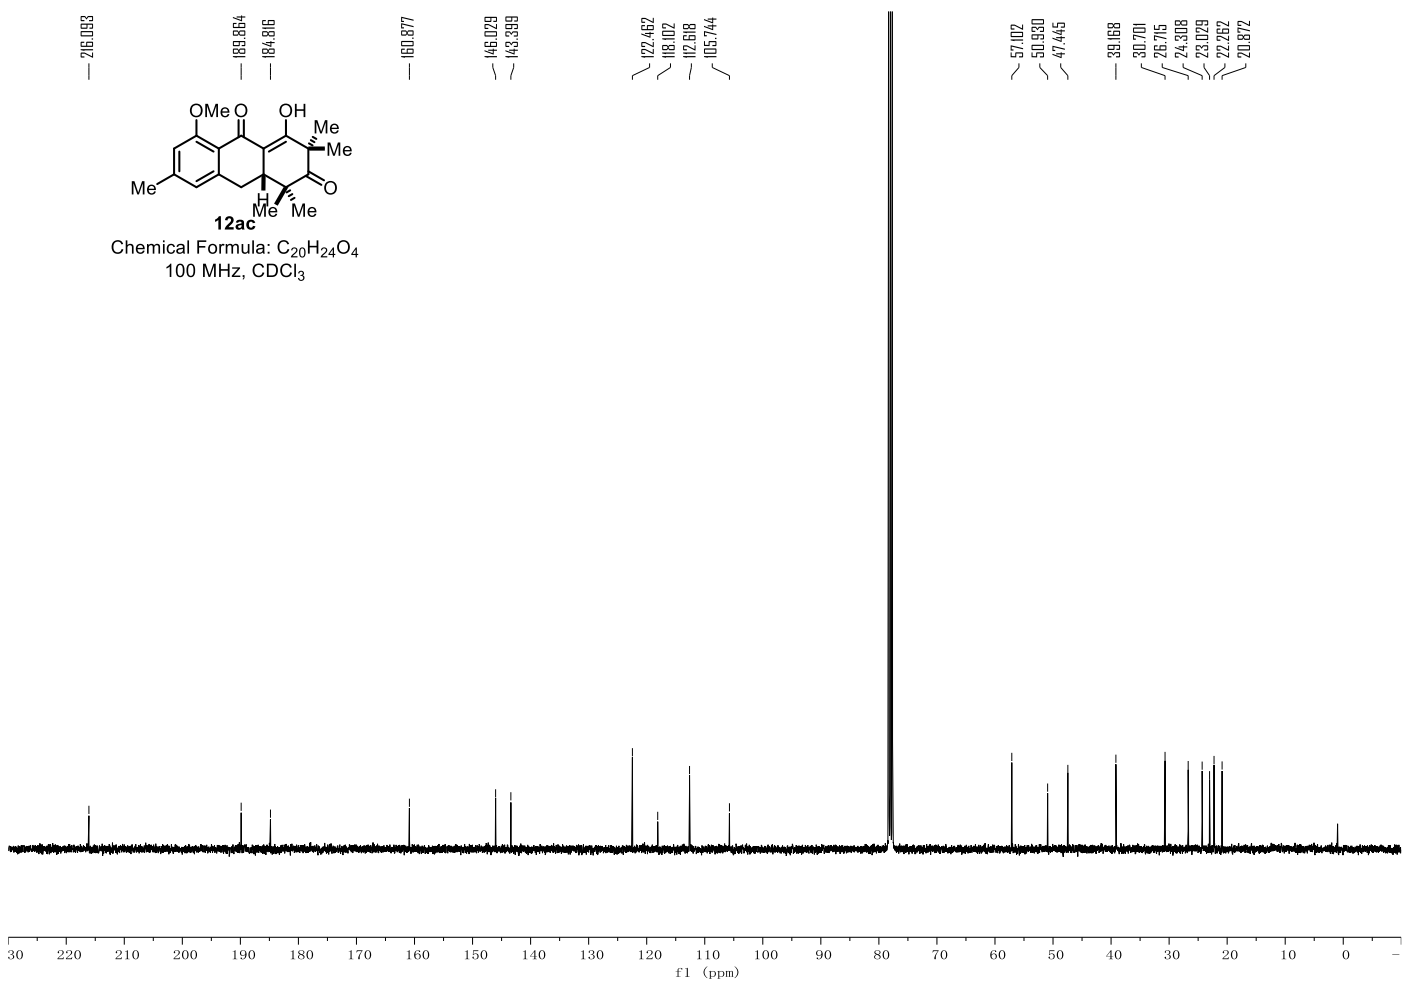



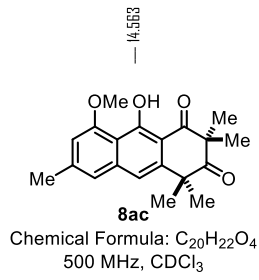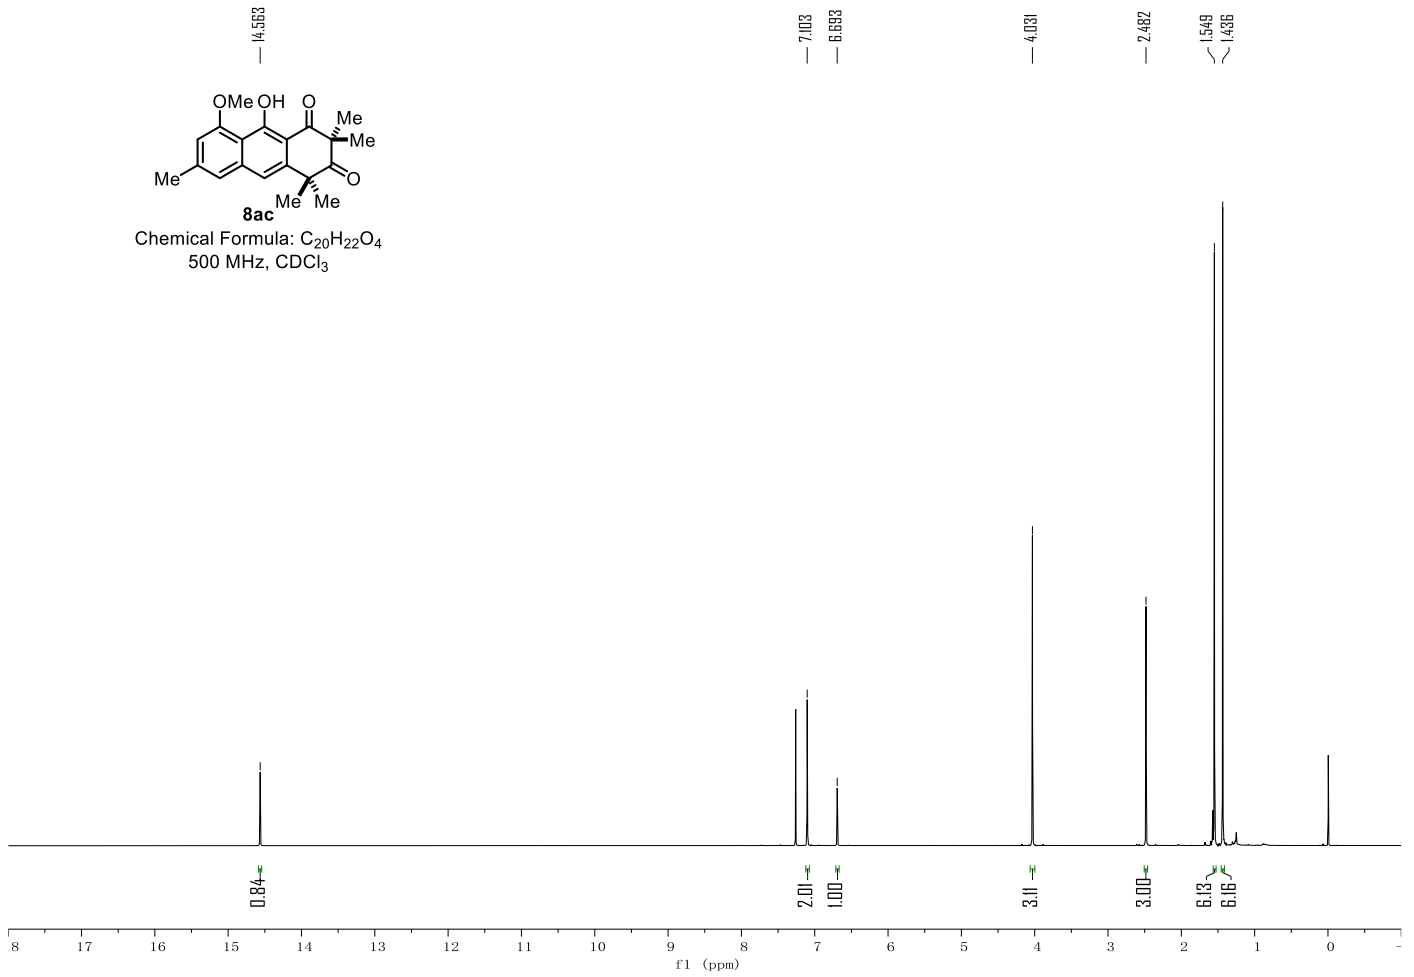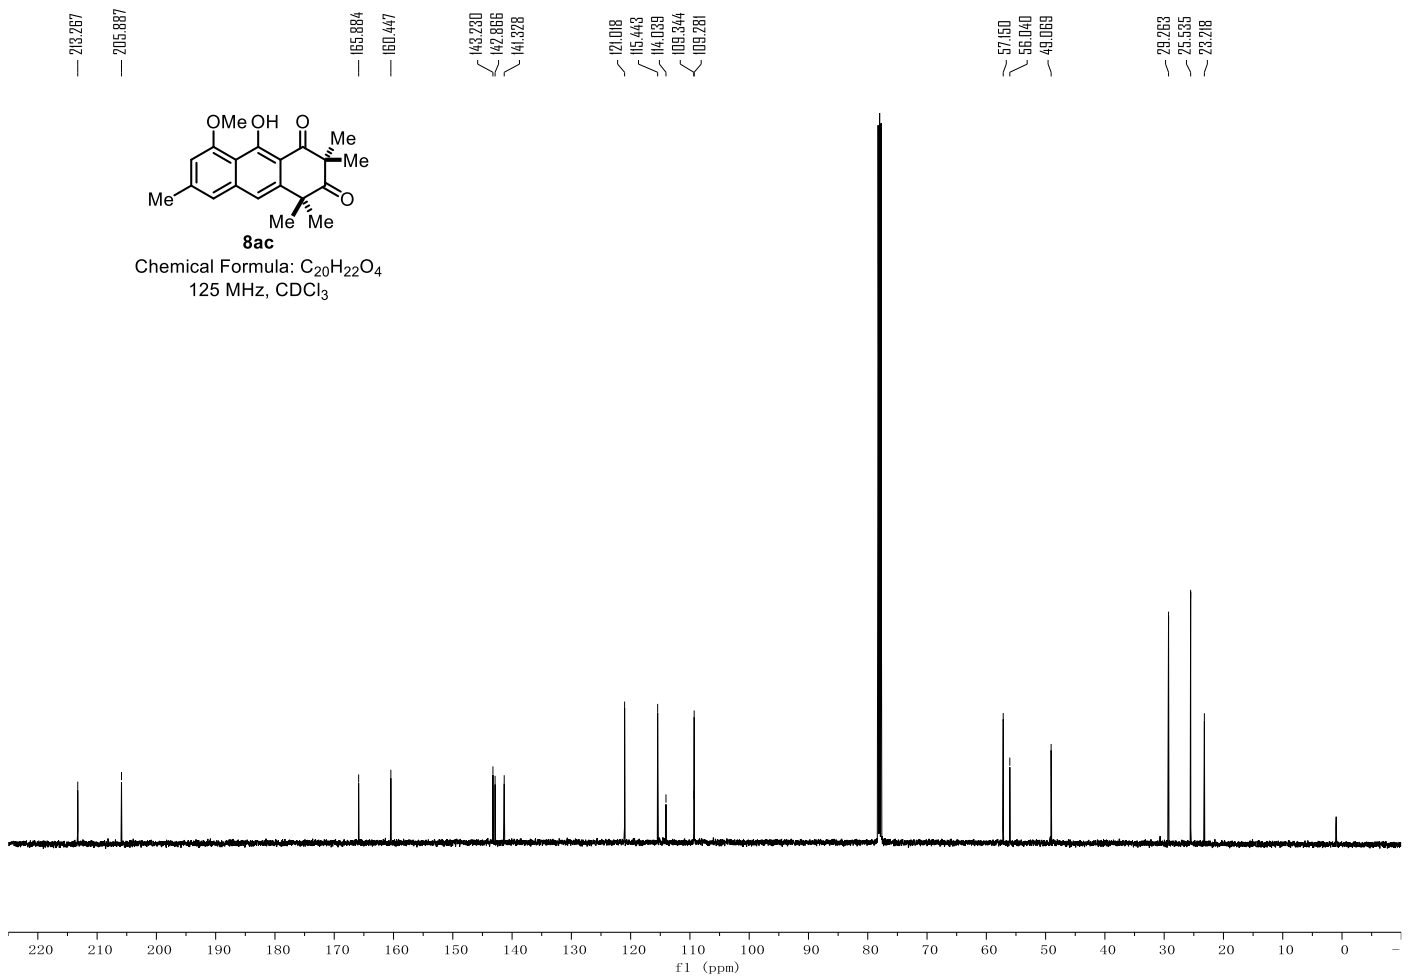

16.757

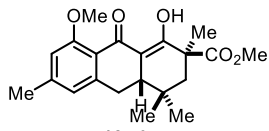

**12ad**

Chemical Formula: C<sub>21</sub>H<sub>26</sub>O<sub>5</sub>  
400 MHz, CDCl<sub>3</sub>

6.676  
6.641

3.922  
3.658  
2.669  
2.665  
2.637  
2.615  
2.582  
2.578  
2.566  
2.538  
2.355  
2.052  
2.018  
1.637  
1.602  
1.057  
1.012

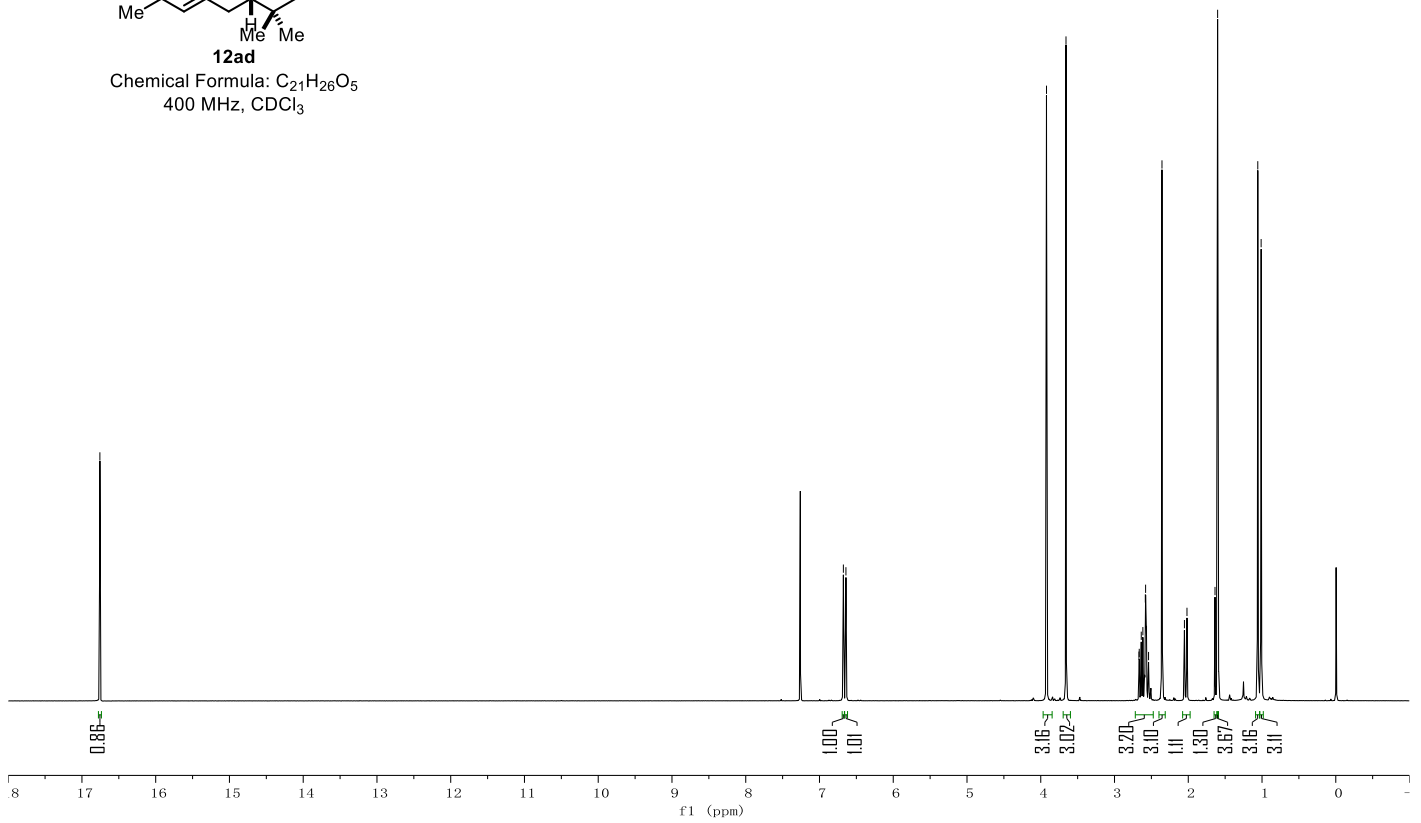

187.780  
180.990  
175.151

160.057

144.898  
144.384

121.107  
117.918  
111.329  
107.405

56.058  
52.576  
49.035  
48.097  
42.863

31.699  
30.837  
29.513  
22.870  
22.721  
22.009

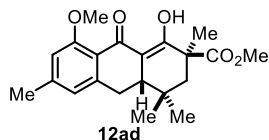

**12ad**

Chemical Formula: C<sub>21</sub>H<sub>26</sub>O<sub>5</sub>  
100 MHz, CDCl<sub>3</sub>

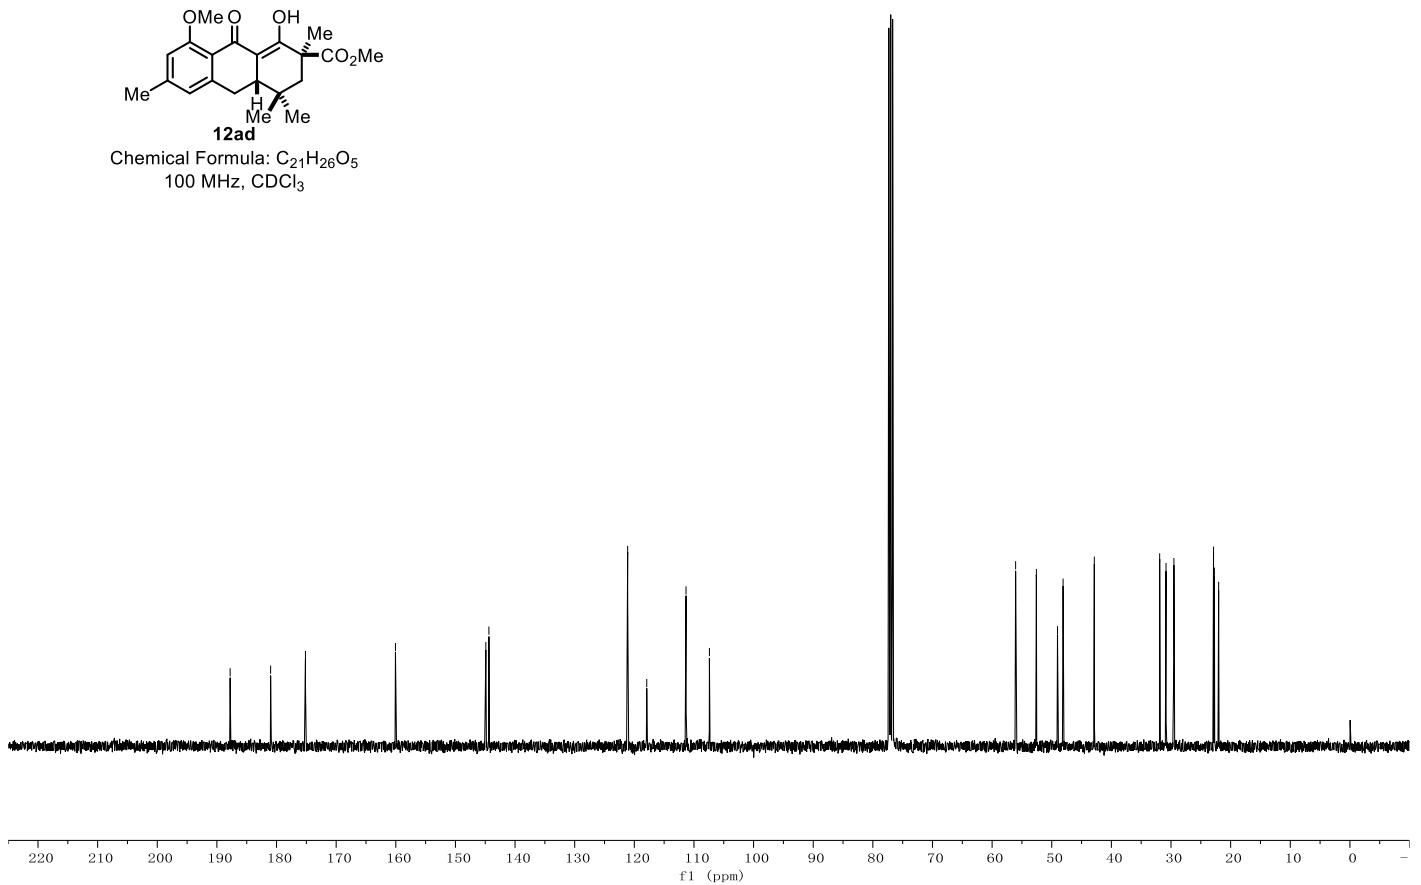

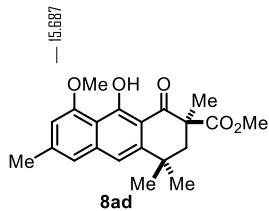

Chemical Formula: C<sub>21</sub>H<sub>24</sub>O<sub>5</sub>  
400 MHz, CDCl<sub>3</sub>

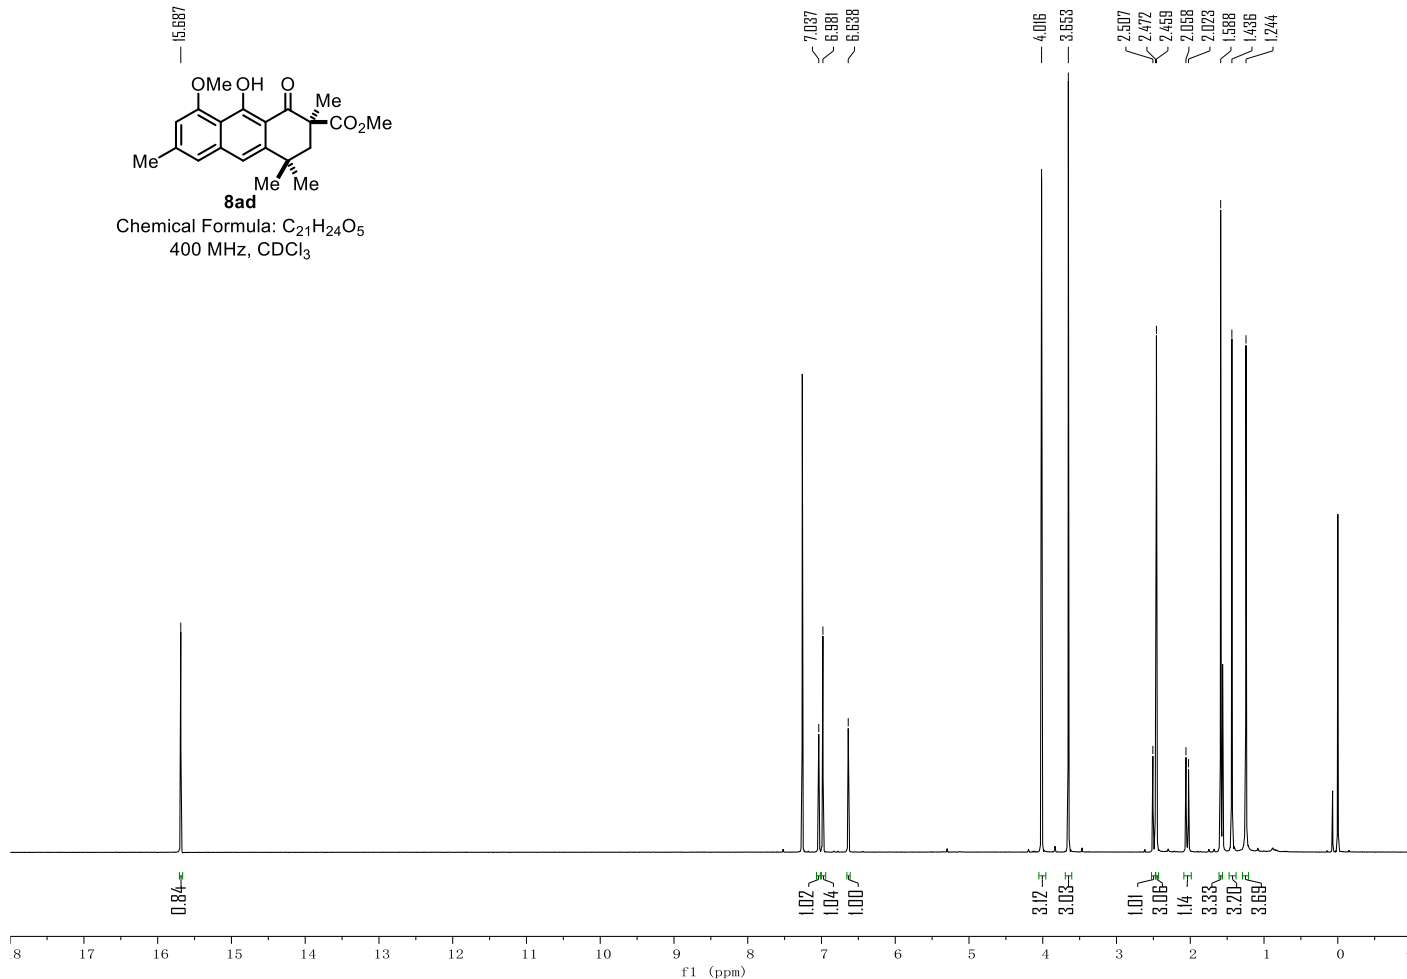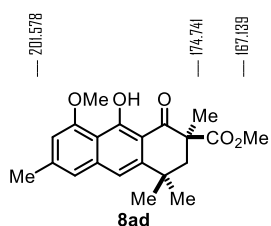

Chemical Formula: C<sub>21</sub>H<sub>24</sub>O<sub>5</sub>  
125 MHz, CDCl<sub>3</sub>

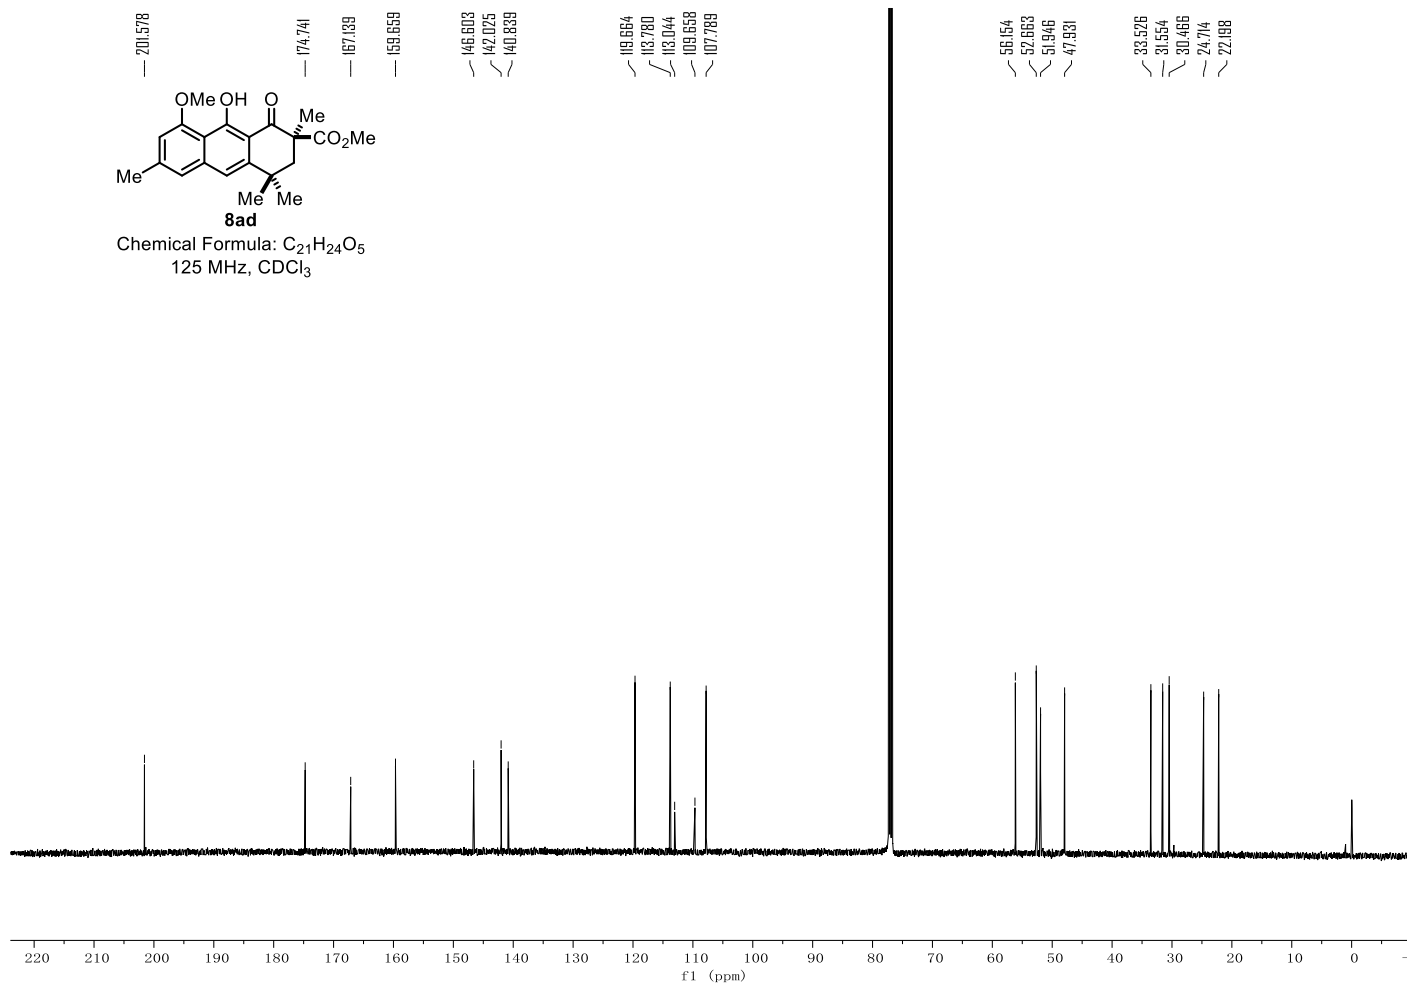

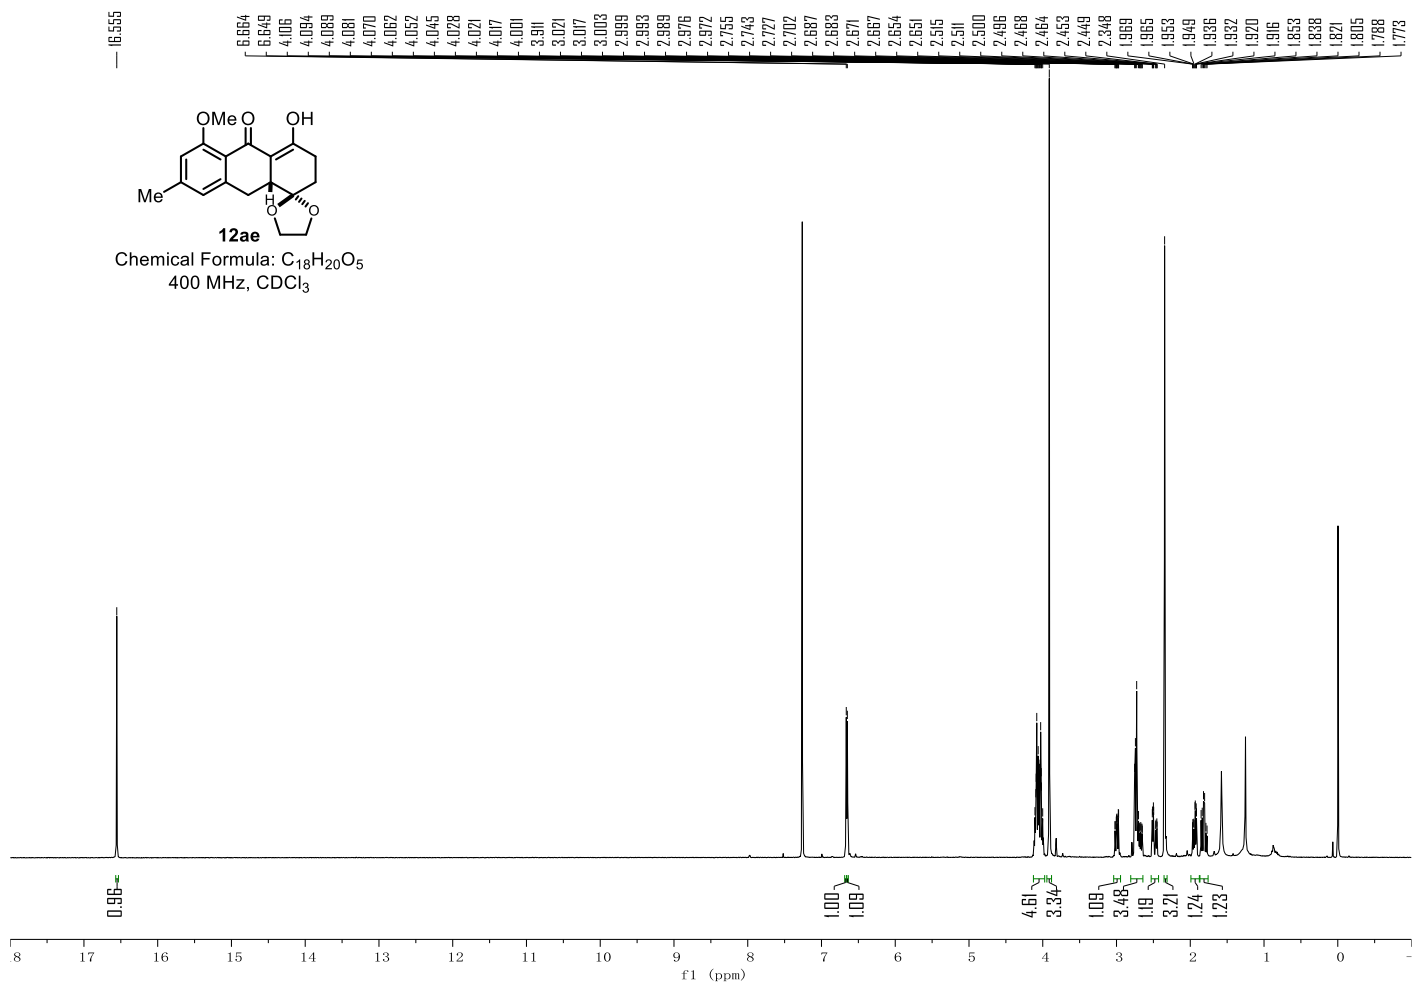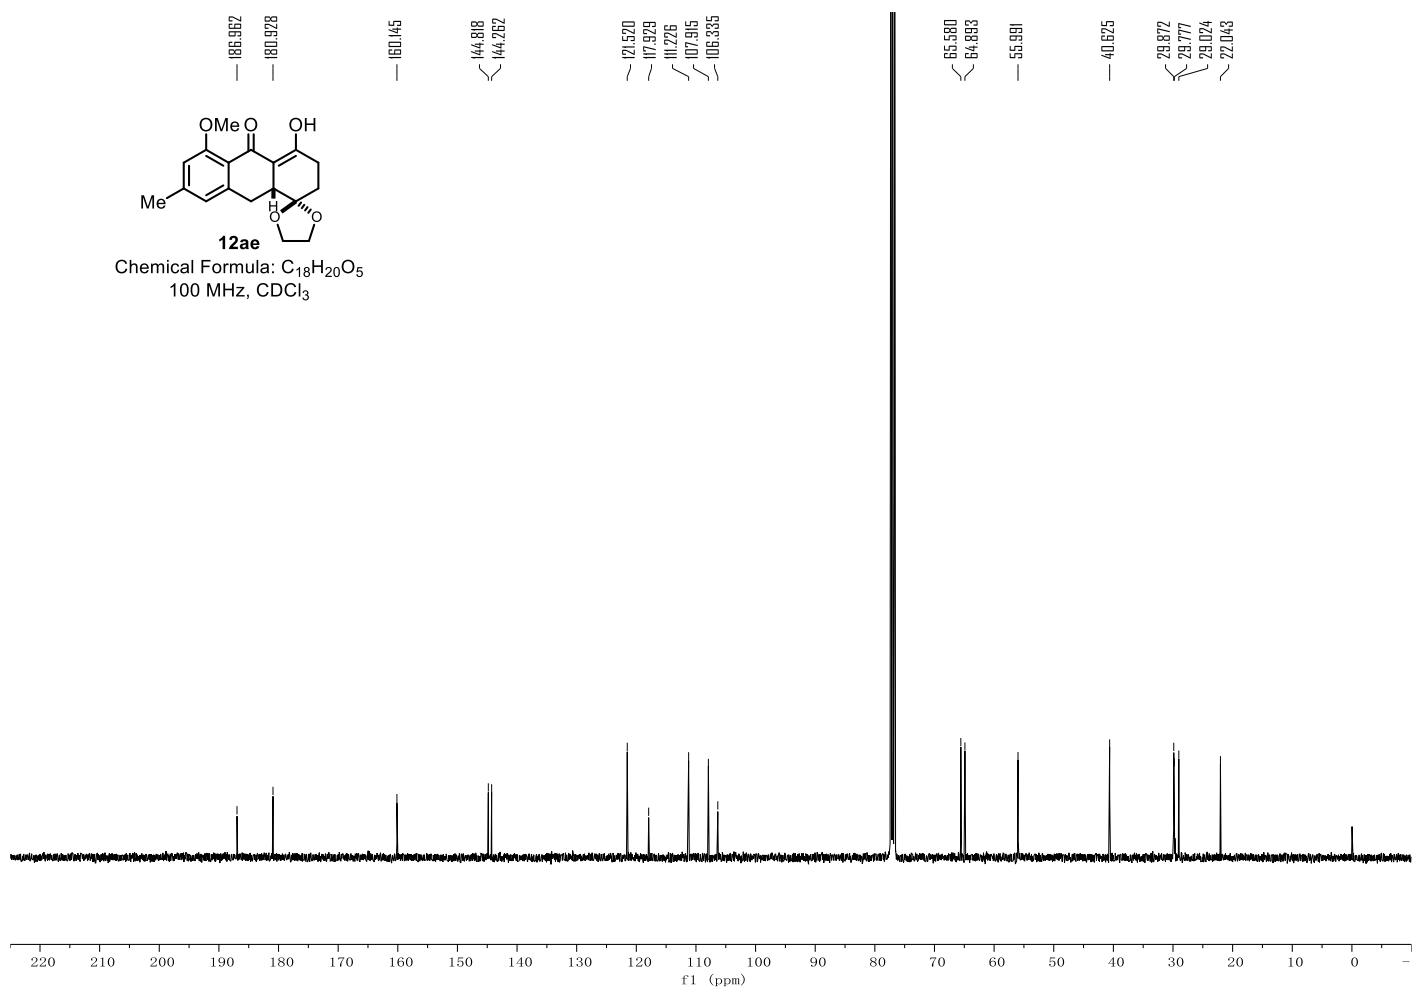

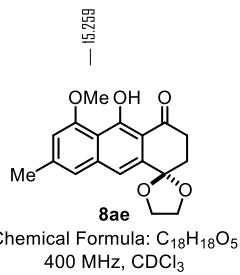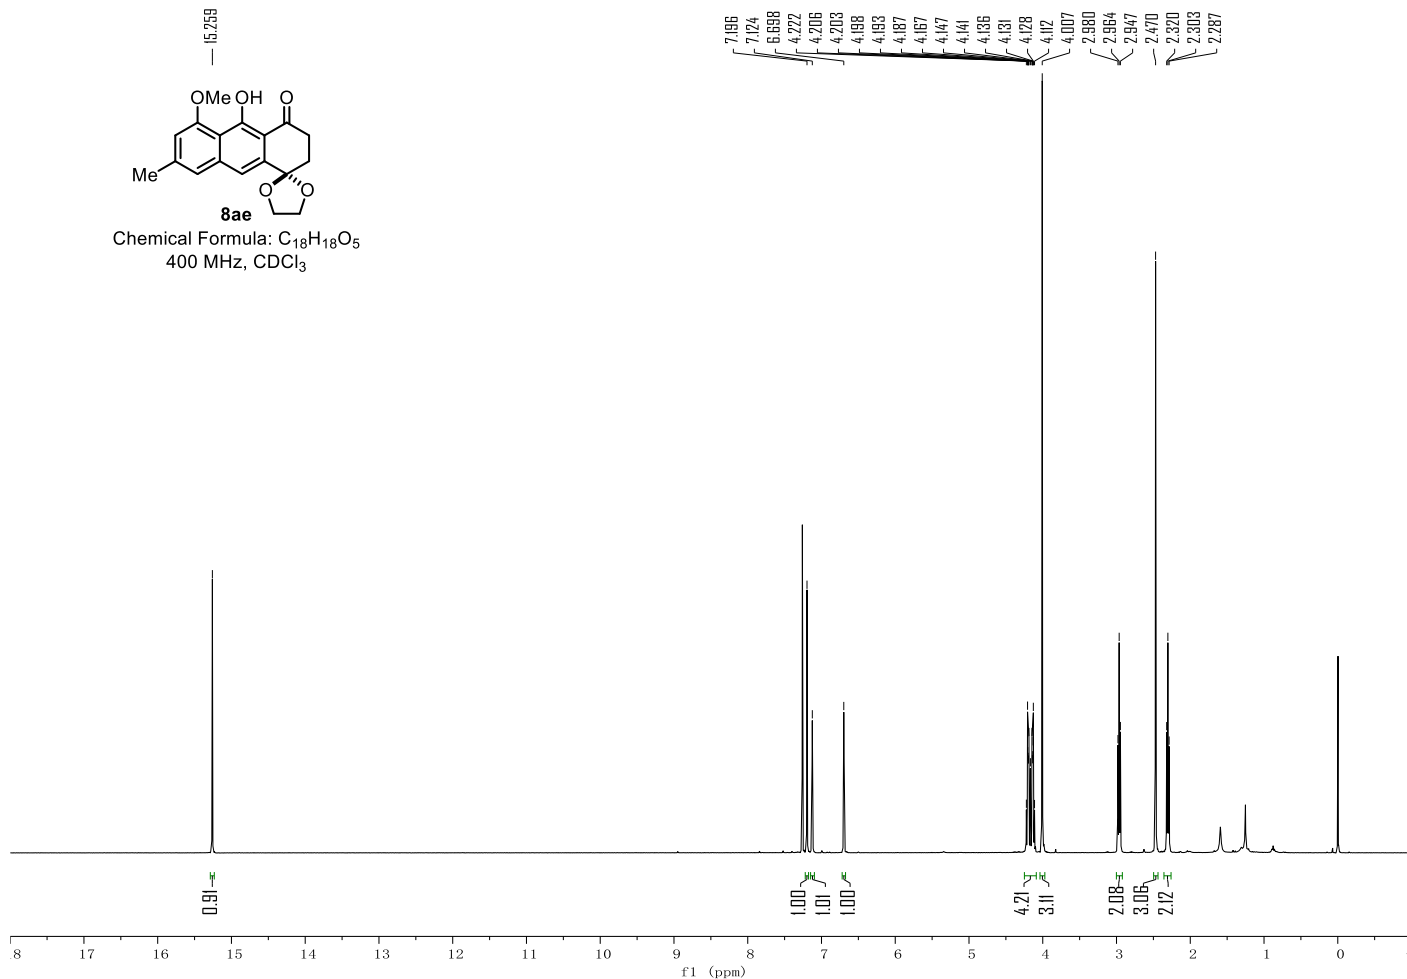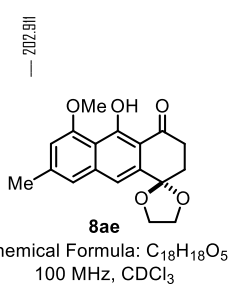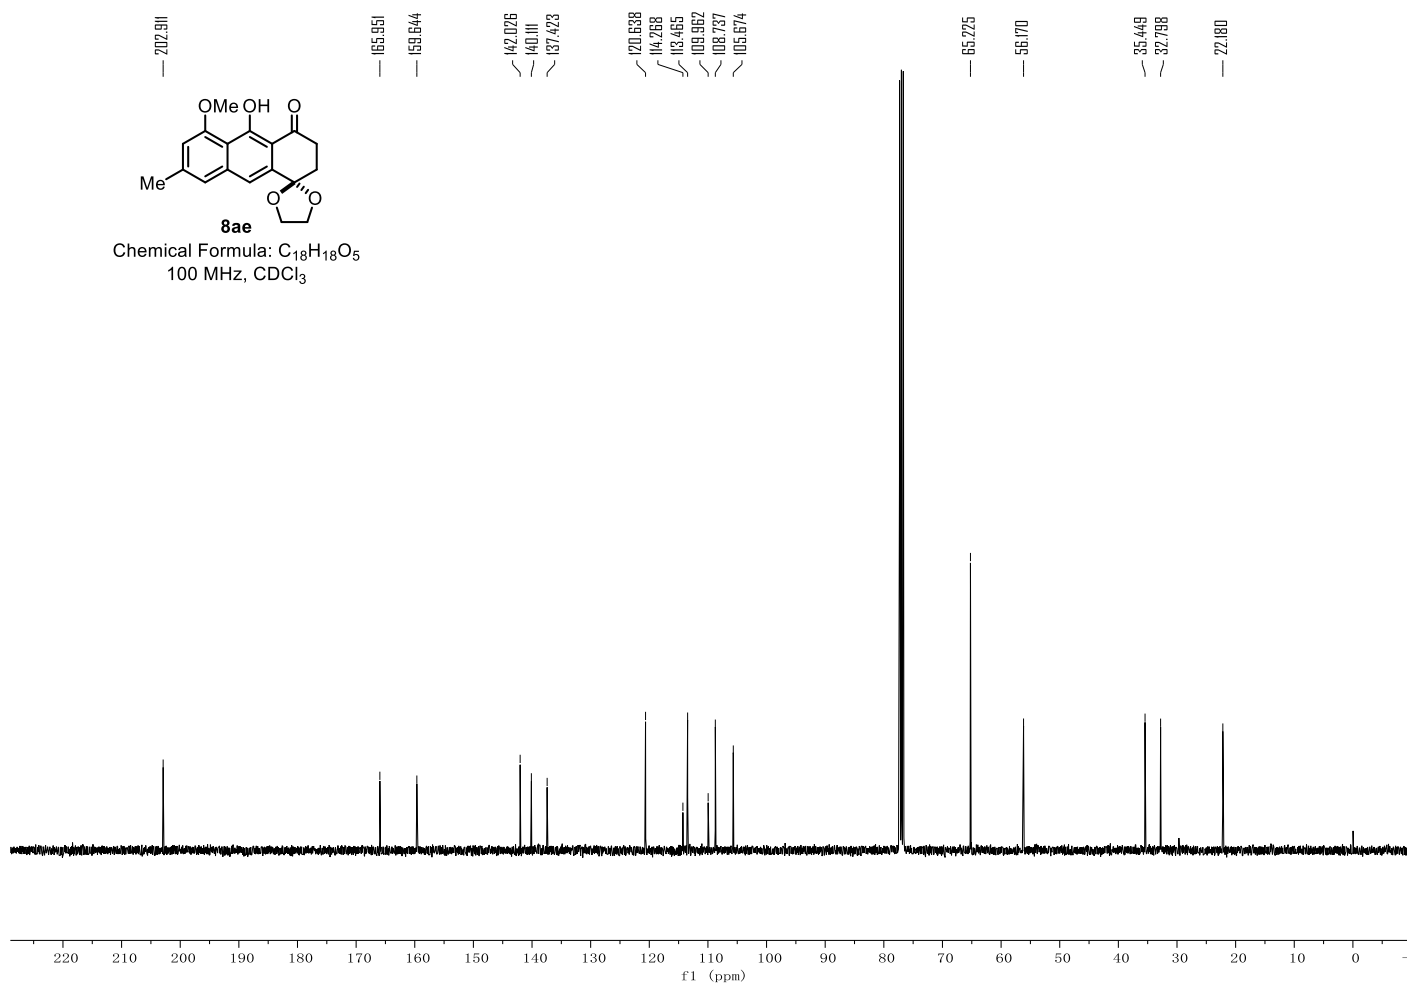

16.626

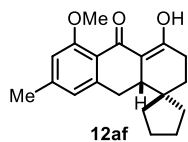

Chemical Formula: C<sub>20</sub>H<sub>24</sub>O<sub>3</sub>  
400 MHz, CDCl<sub>3</sub>

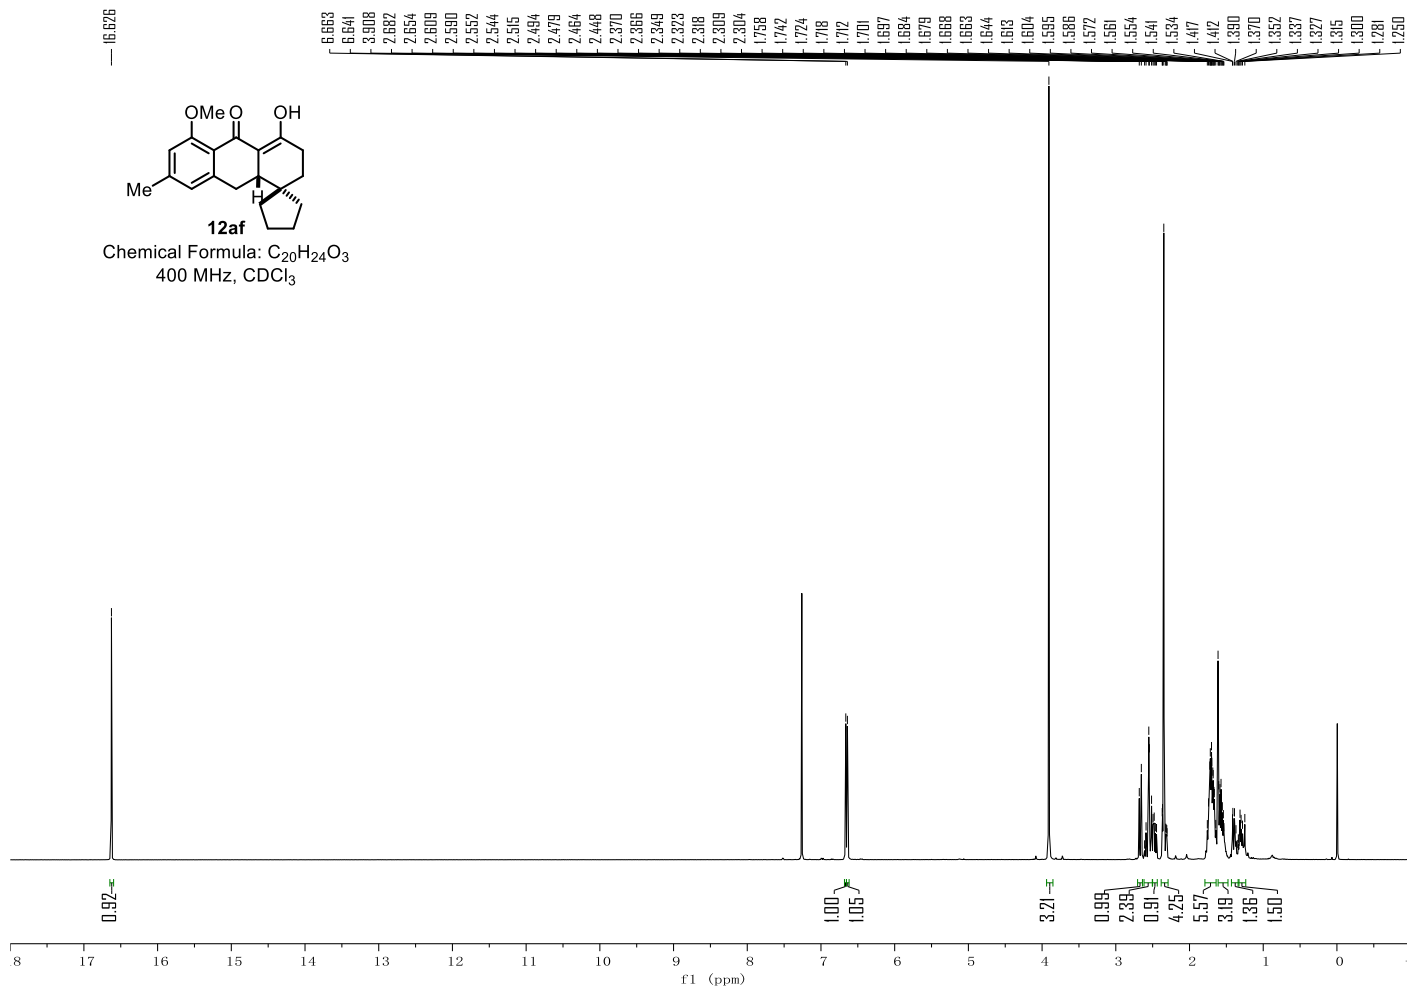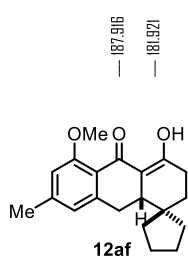

Chemical Formula: C<sub>20</sub>H<sub>24</sub>O<sub>3</sub>  
100 MHz, CDCl<sub>3</sub>

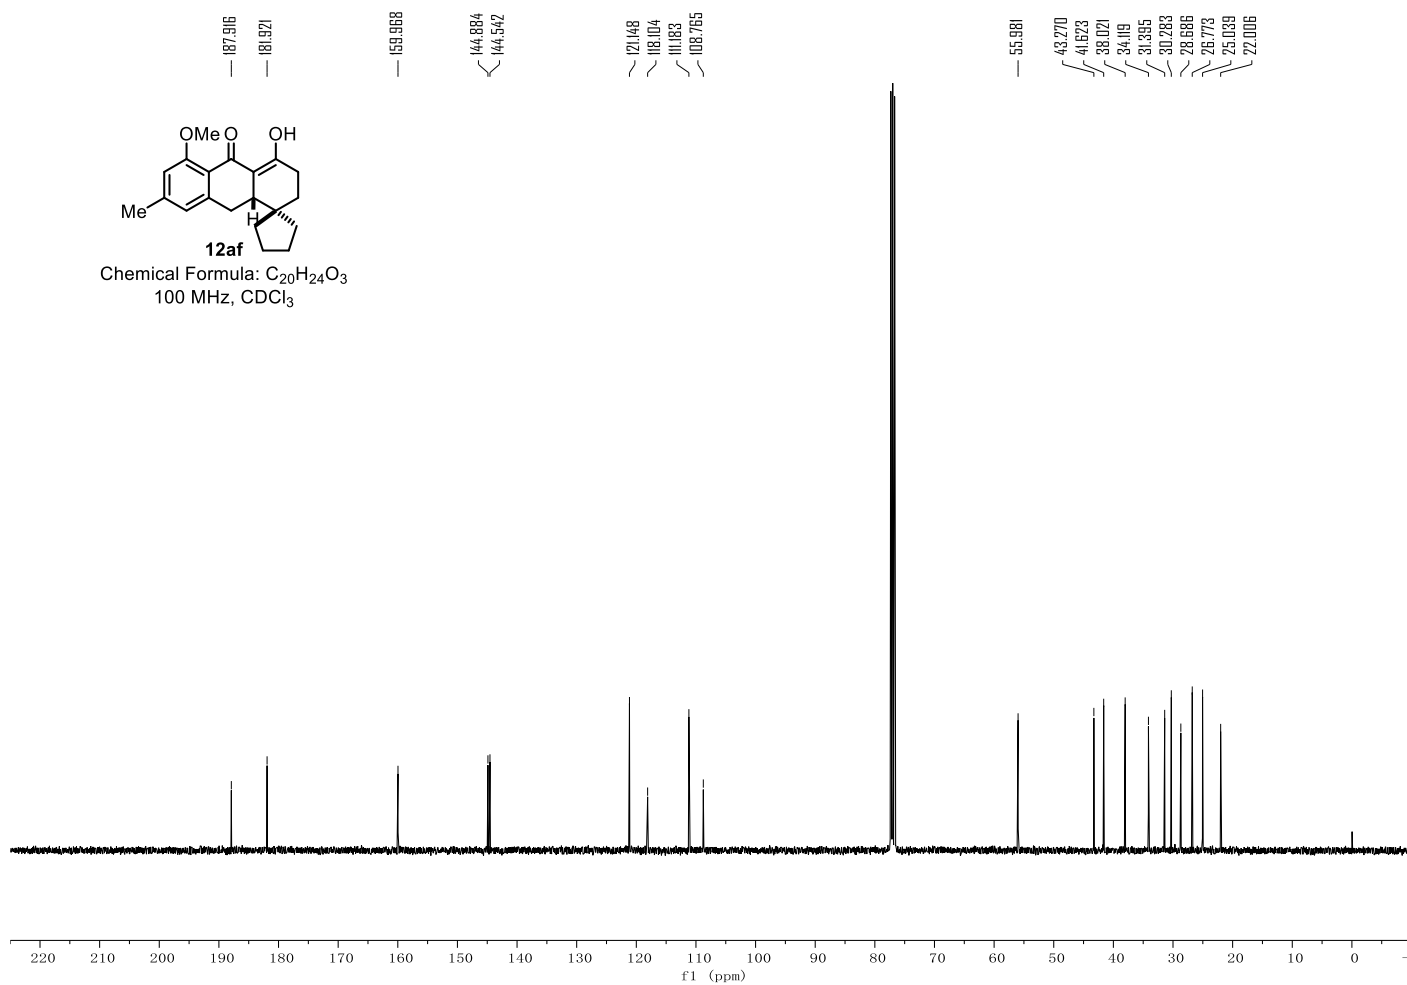

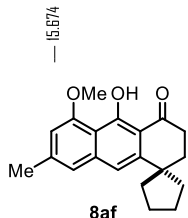

Chemical Formula:  $C_{20}H_{22}O_3$   
400 MHz,  $CDCl_3$

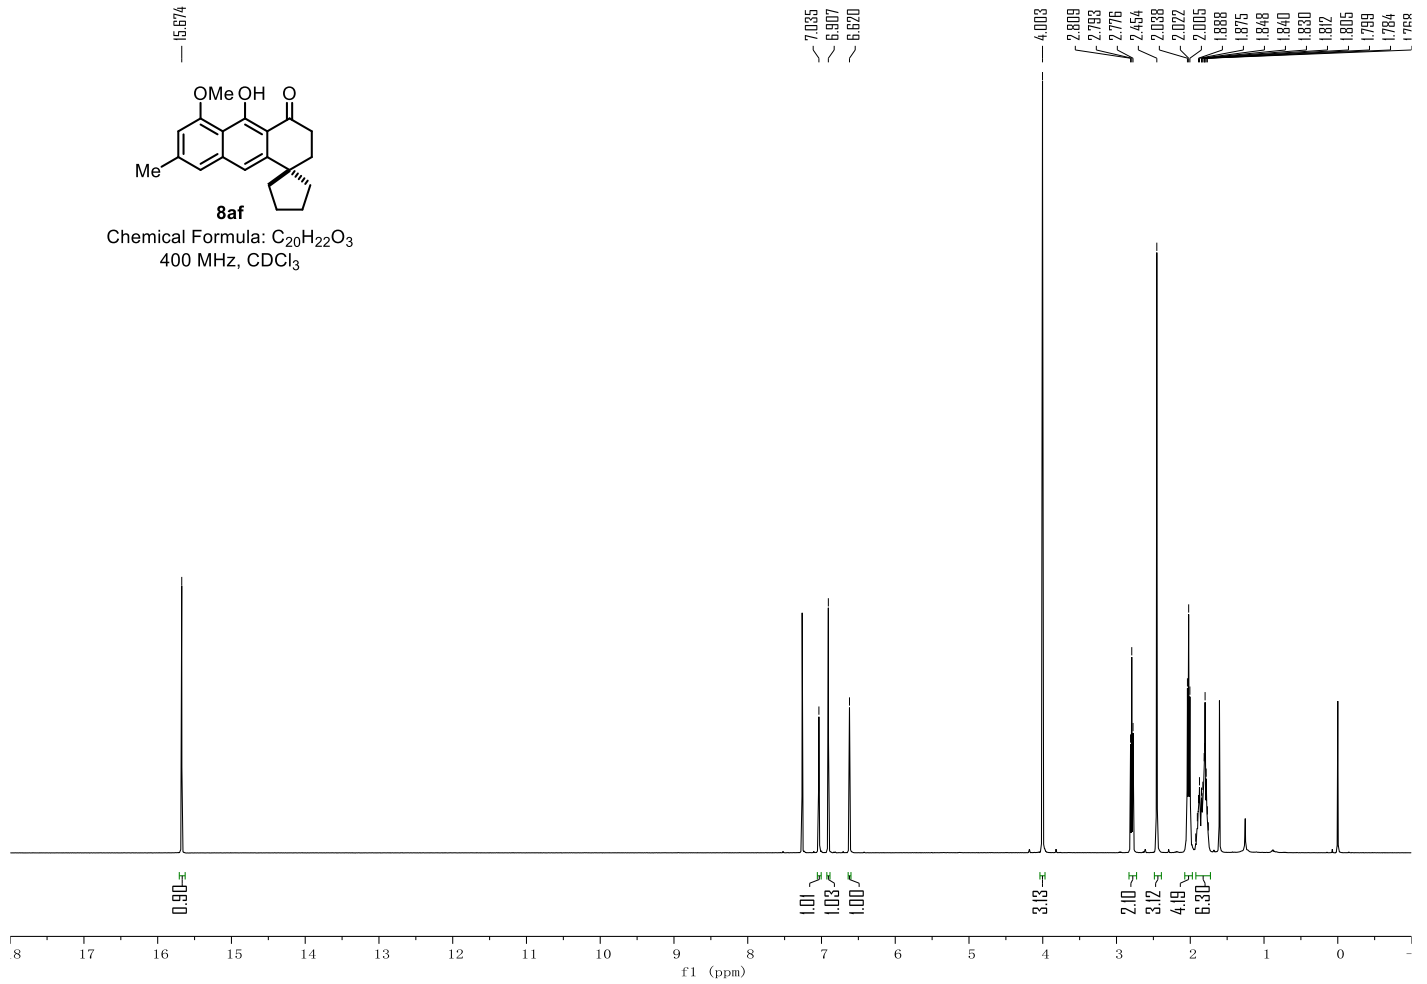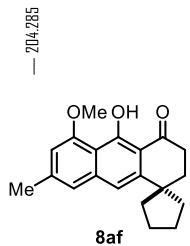

Chemical Formula:  $C_{20}H_{22}O_3$   
100 MHz,  $CDCl_3$

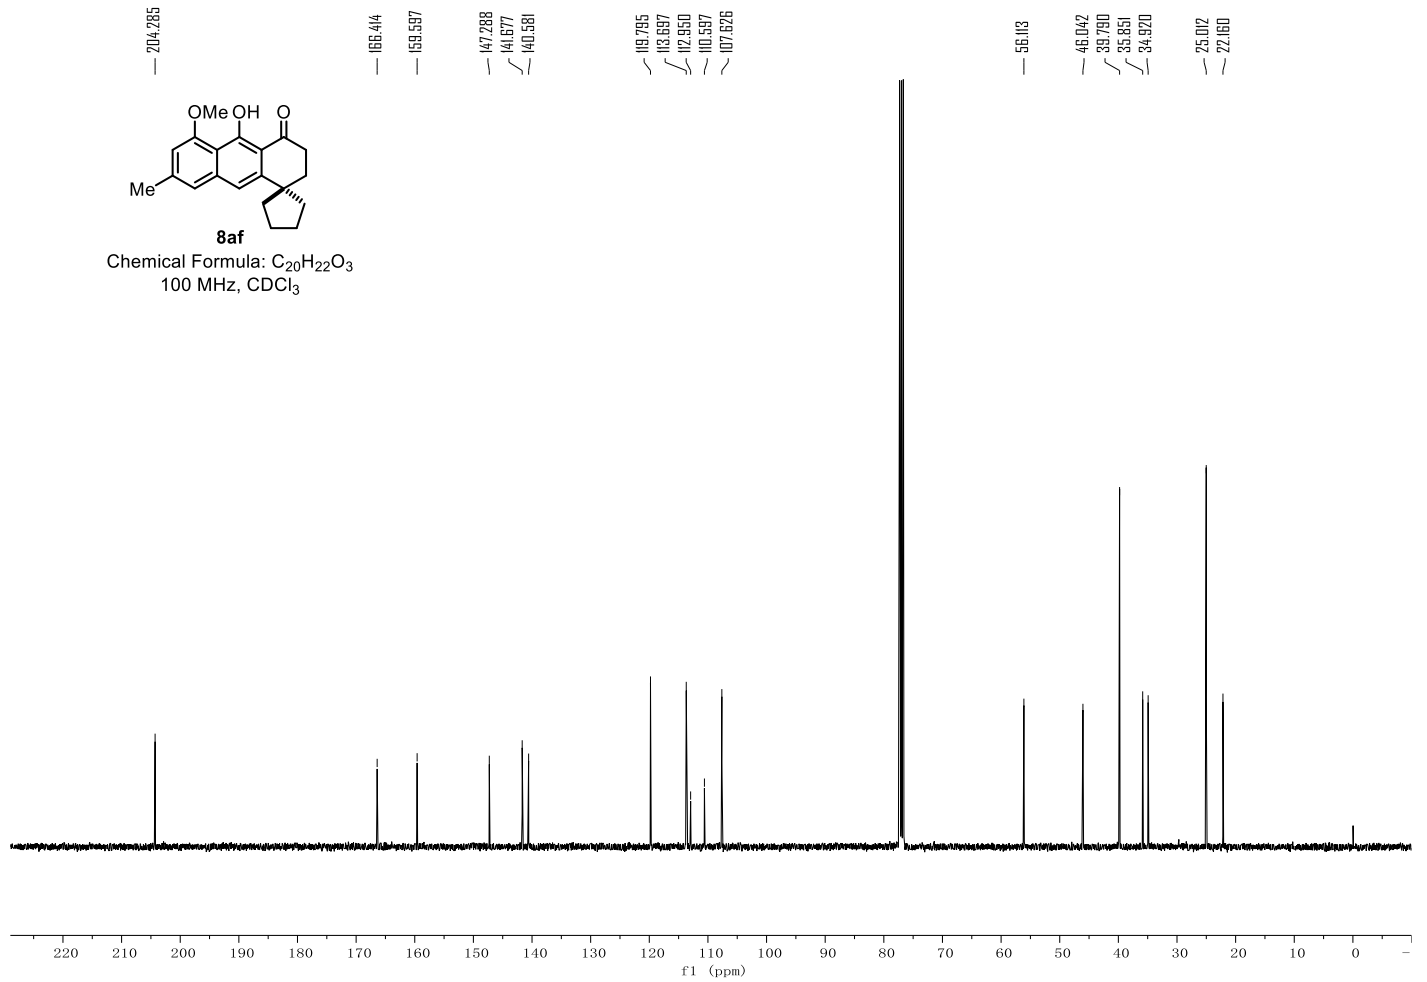

16.620

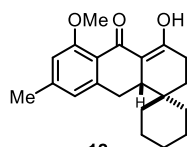

**12ag**

Chemical Formula: C<sub>21</sub>H<sub>26</sub>O<sub>3</sub>  
400 MHz, CDCl<sub>3</sub>

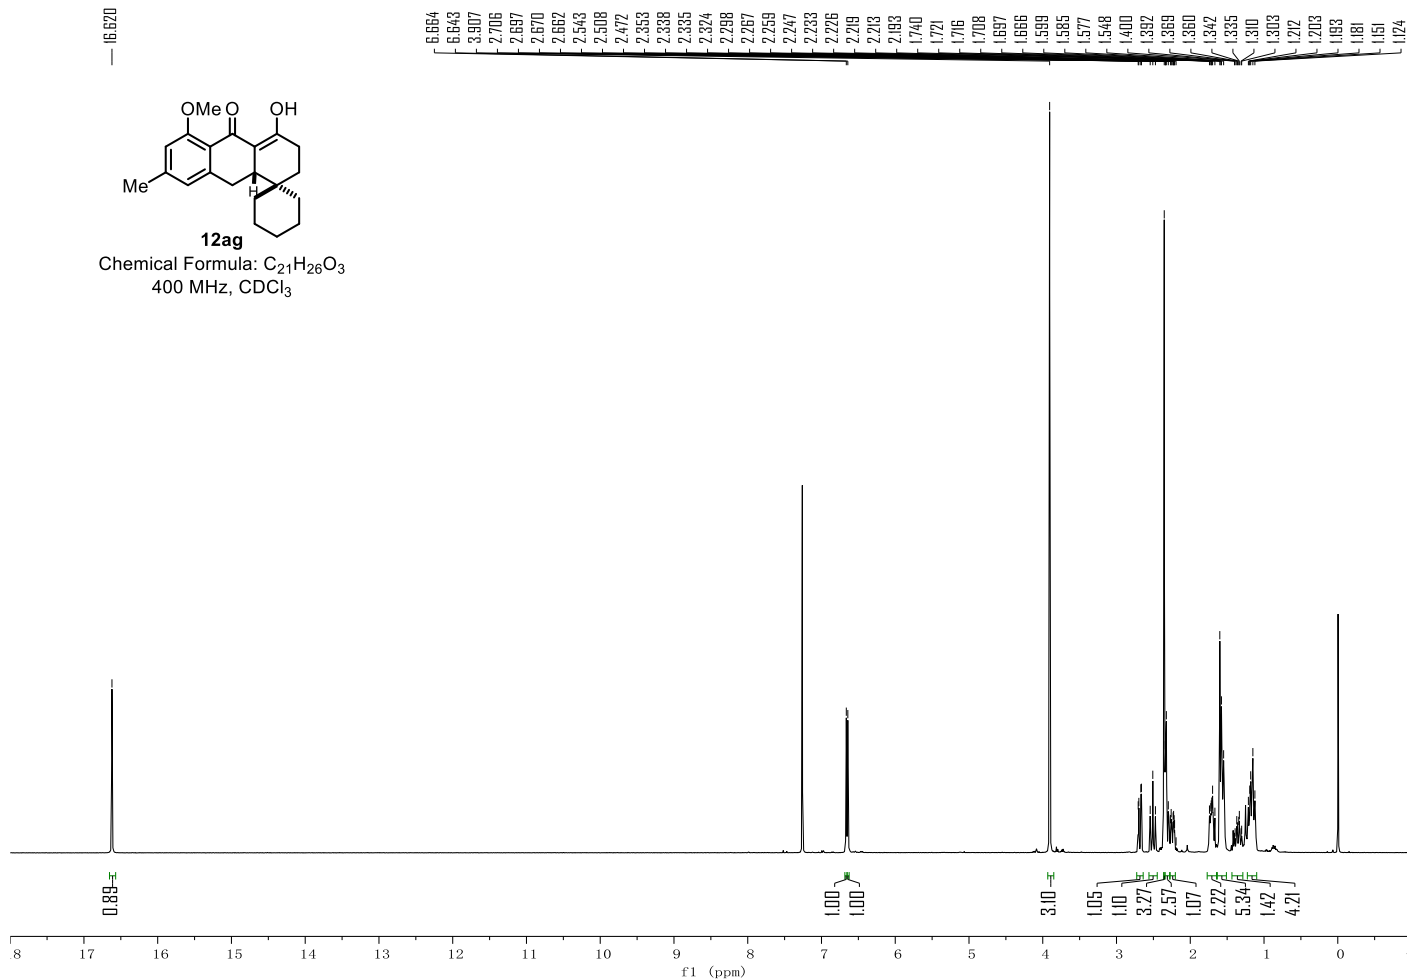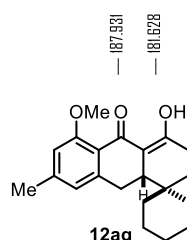

**12ag**

Chemical Formula: C<sub>21</sub>H<sub>26</sub>O<sub>3</sub>  
100 MHz, CDCl<sub>3</sub>

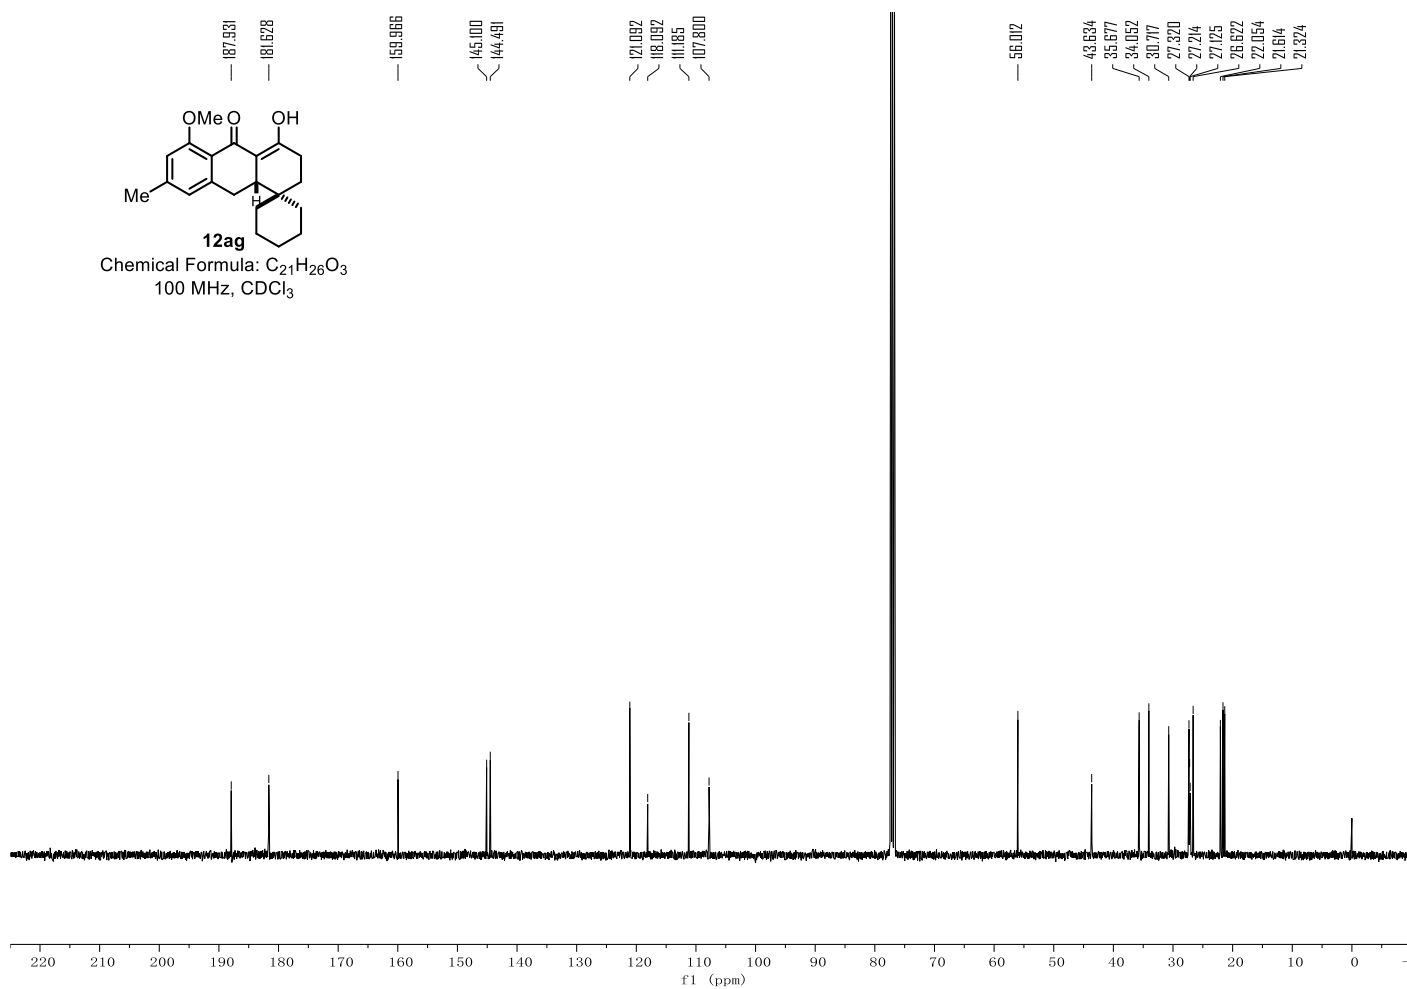



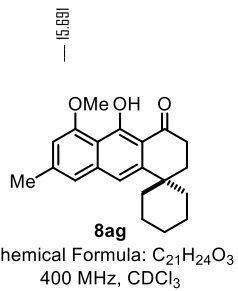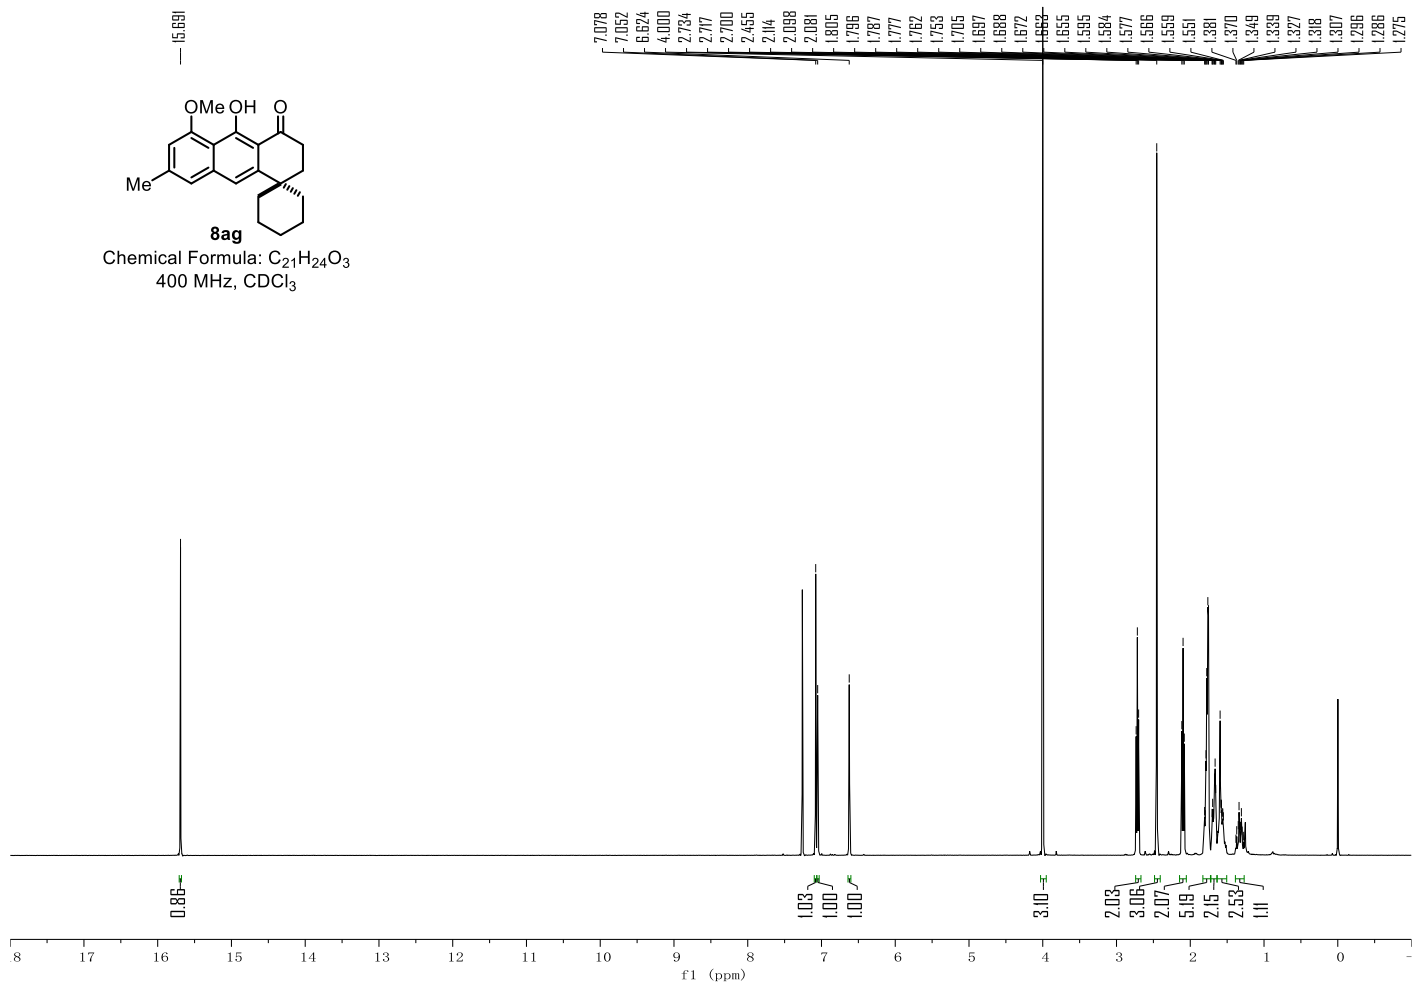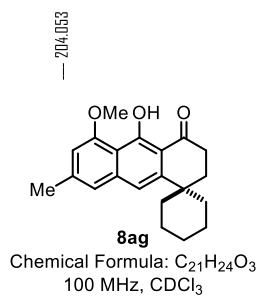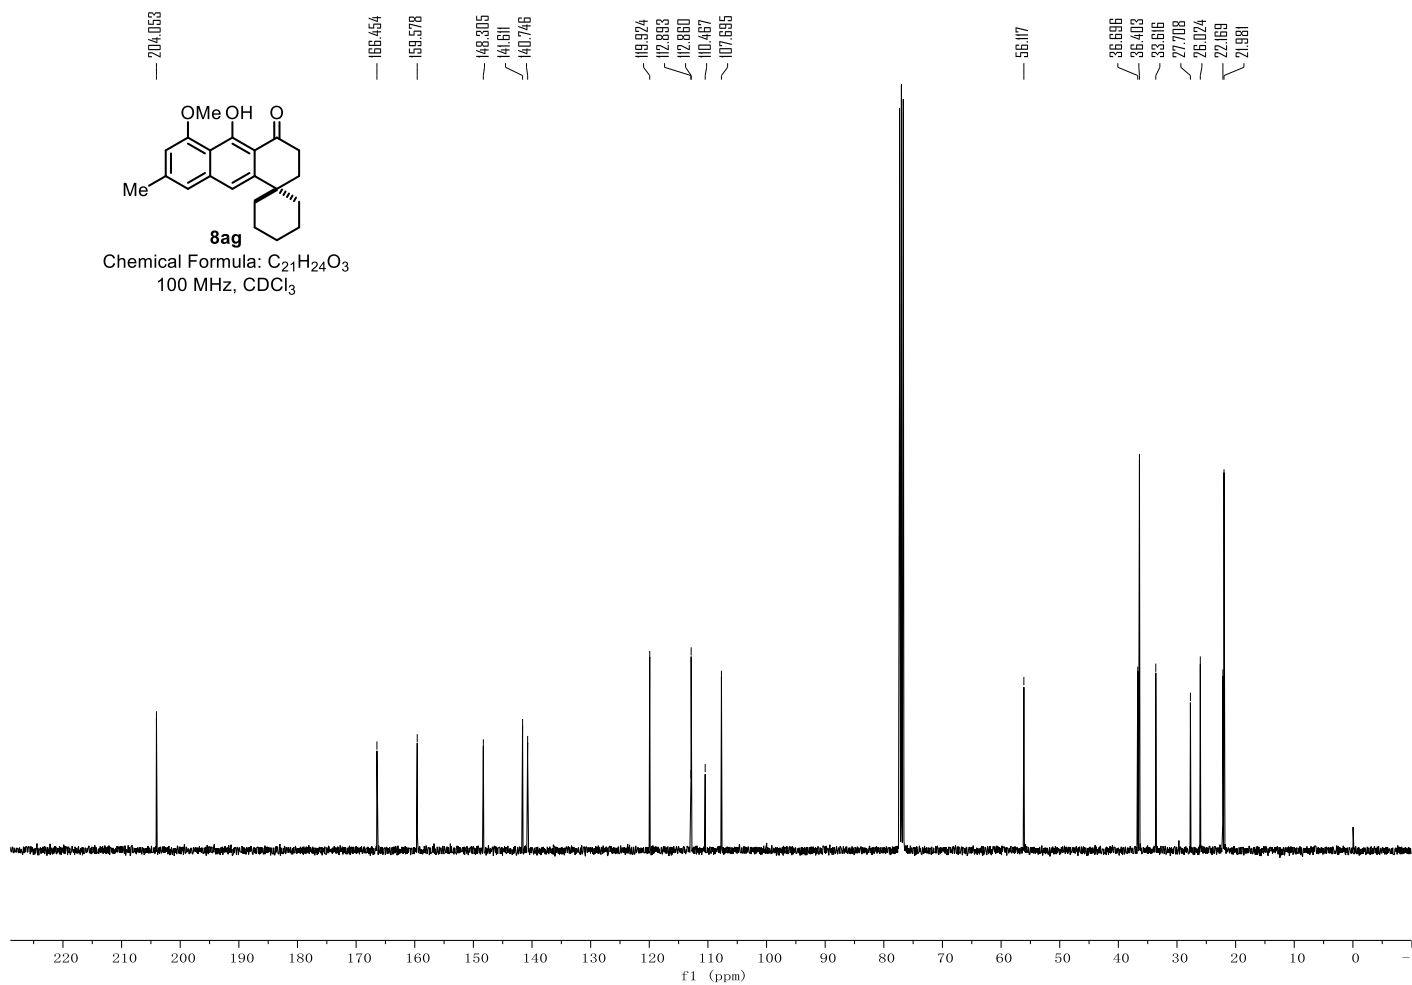

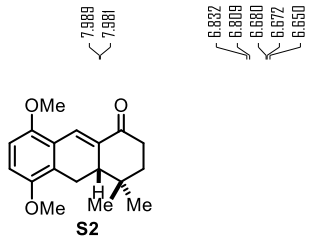

Chemical Formula: C<sub>18</sub>H<sub>22</sub>O<sub>3</sub>  
400 MHz, CDCl<sub>3</sub>

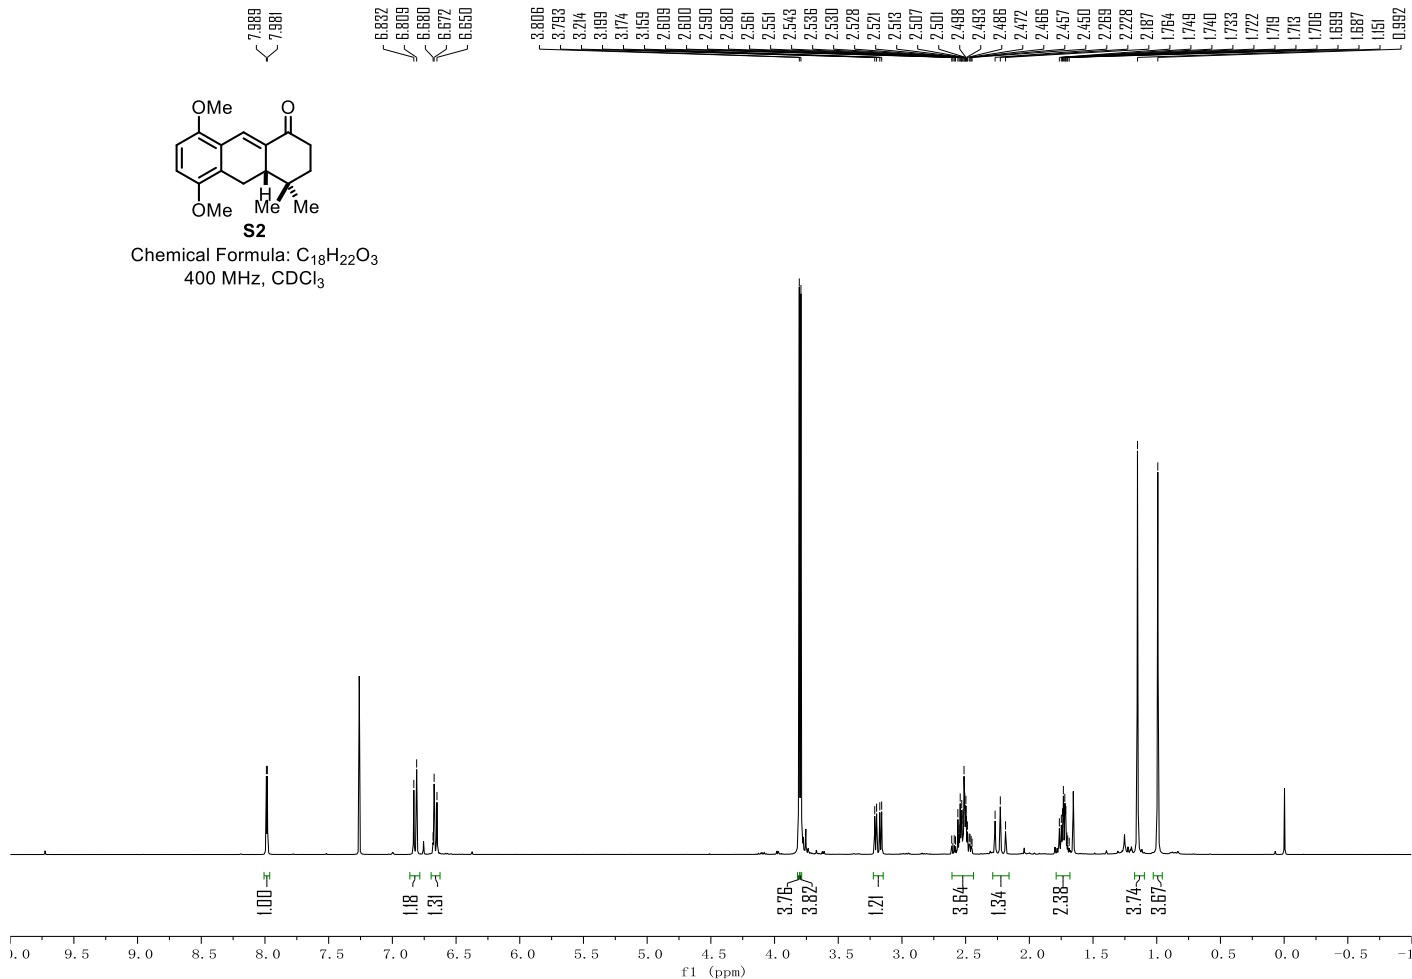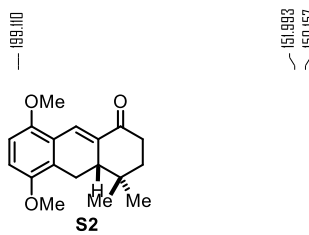

Chemical Formula: C<sub>18</sub>H<sub>22</sub>O<sub>3</sub>  
100 MHz, CDCl<sub>3</sub>

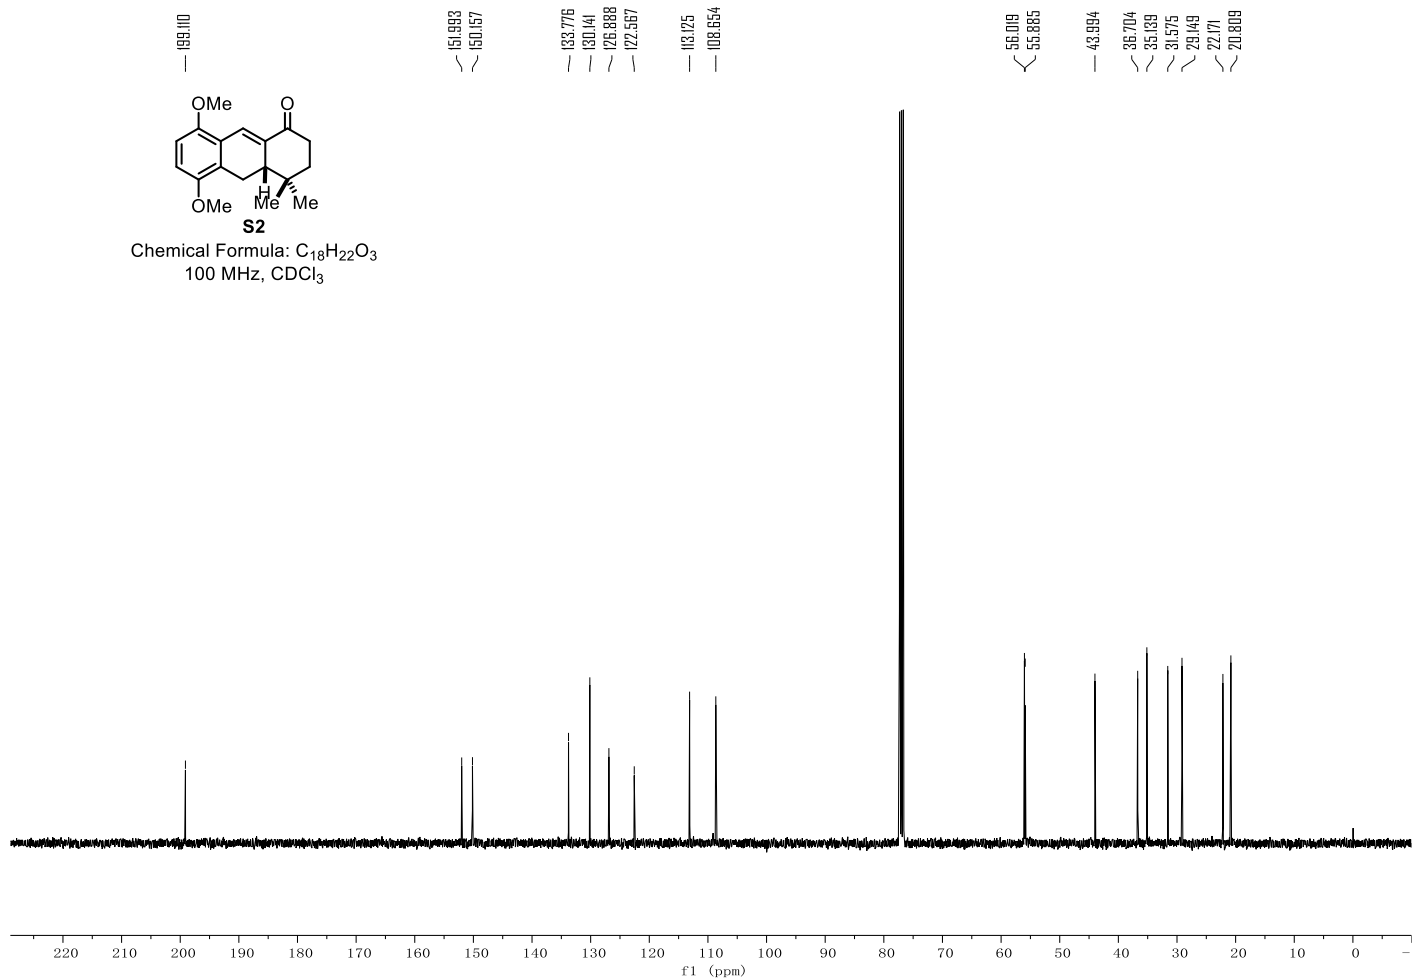

8.963  
8.191  
6.780  
6.769  
6.660  
6.629

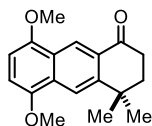

**S8**

Chemical Formula: C<sub>18</sub>H<sub>20</sub>O<sub>3</sub>  
400 MHz, CDCl<sub>3</sub>

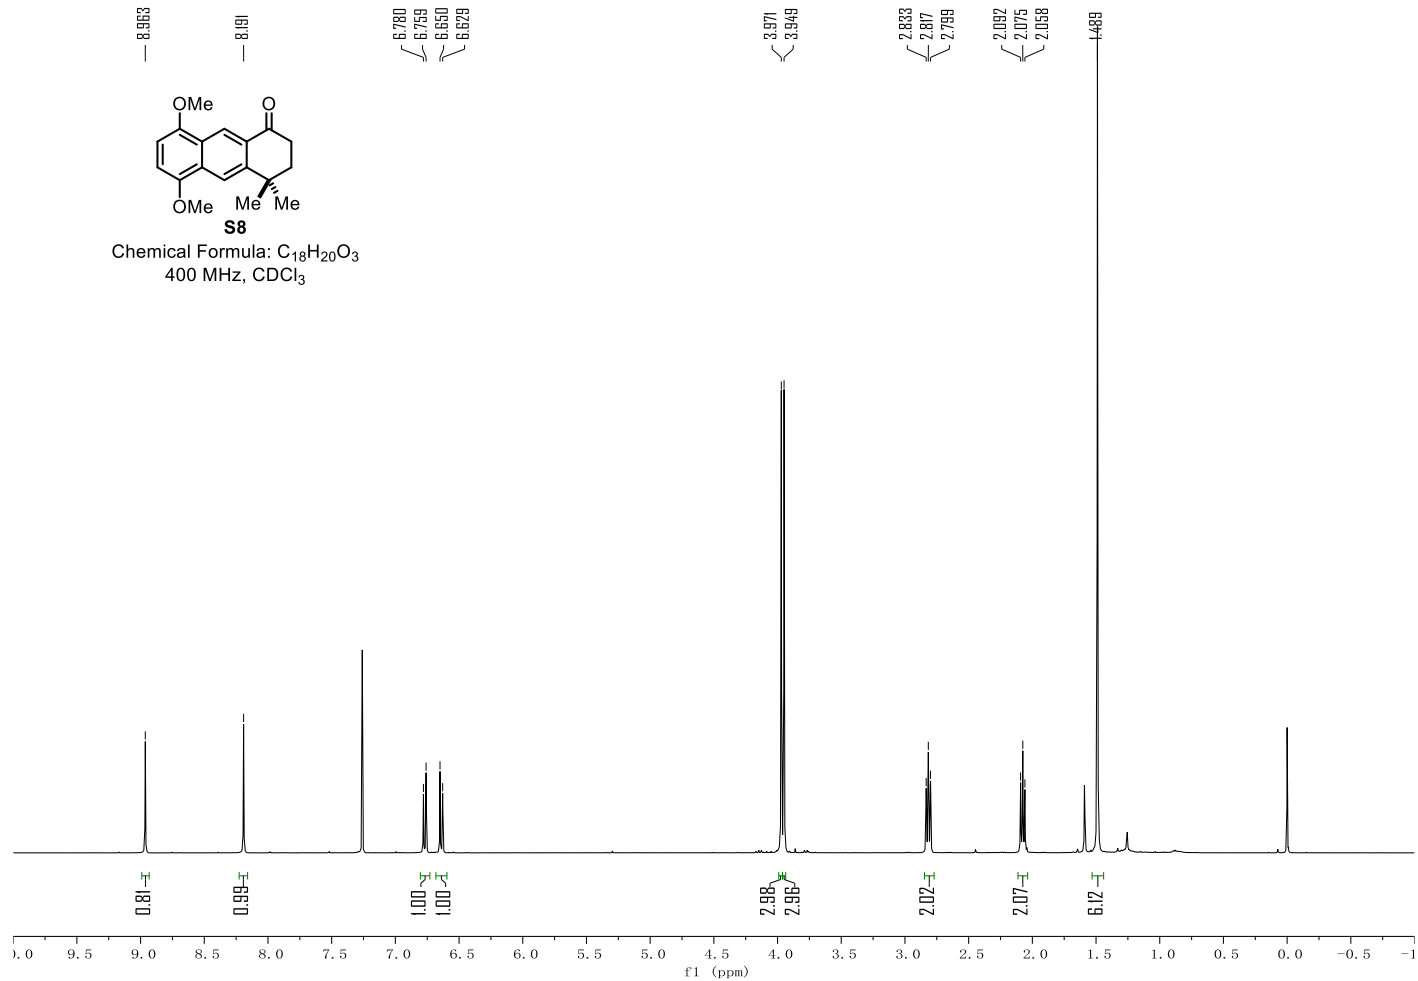

198.707  
151.068  
148.855  
147.706  
128.284  
128.955  
124.543  
123.512  
118.233  
105.995  
102.944  
55.757  
55.676  
37.091  
35.461  
34.215  
30.187

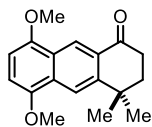

**S8**

Chemical Formula: C<sub>18</sub>H<sub>20</sub>O<sub>3</sub>  
100 MHz, CDCl<sub>3</sub>

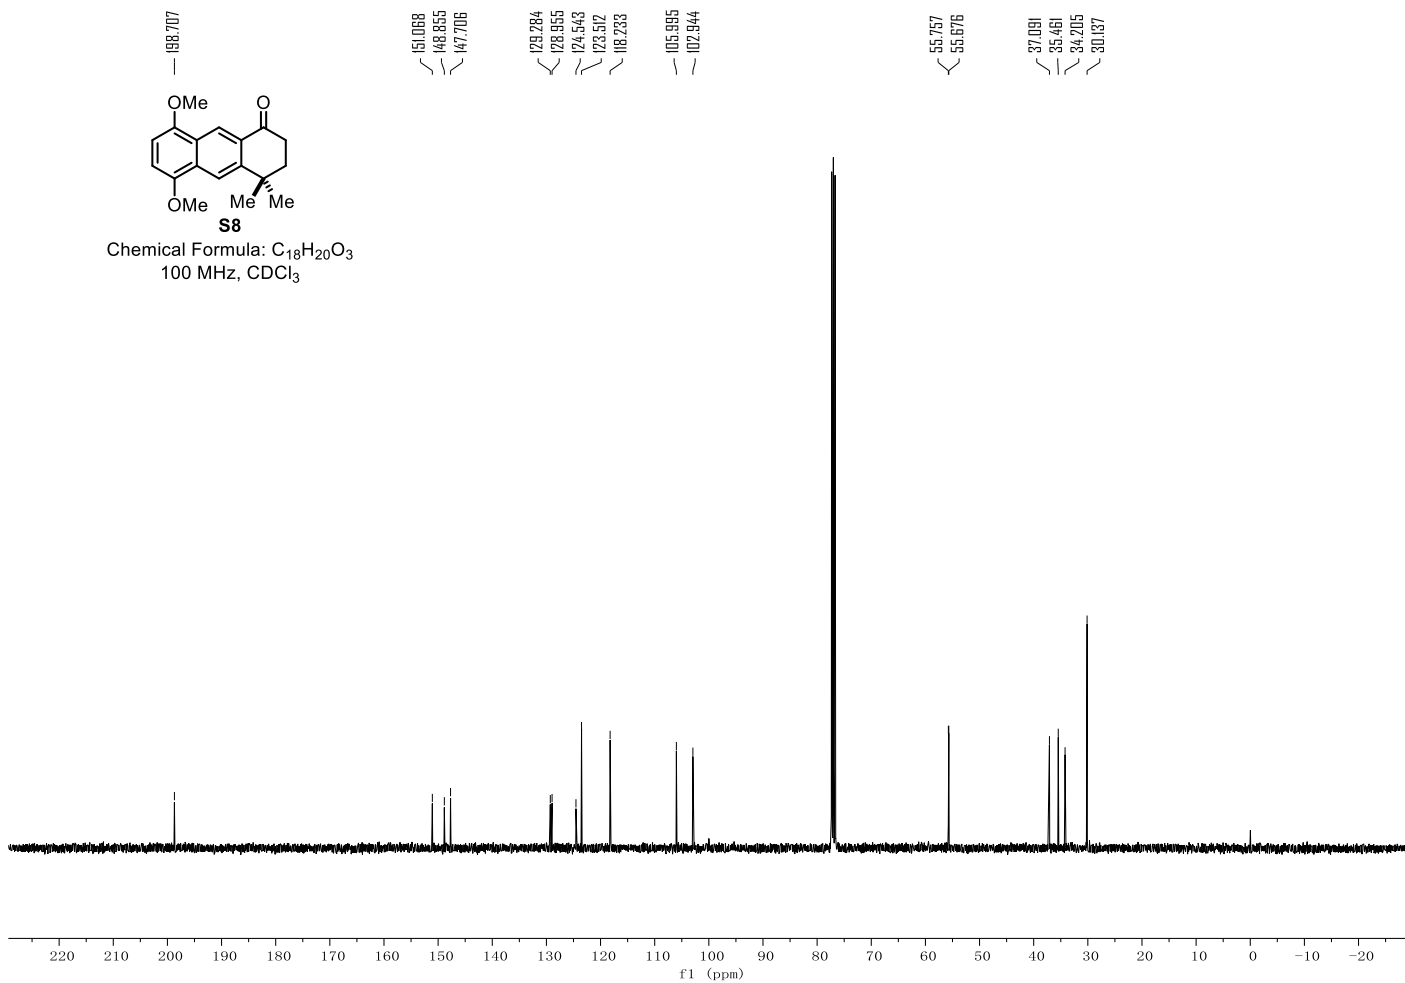

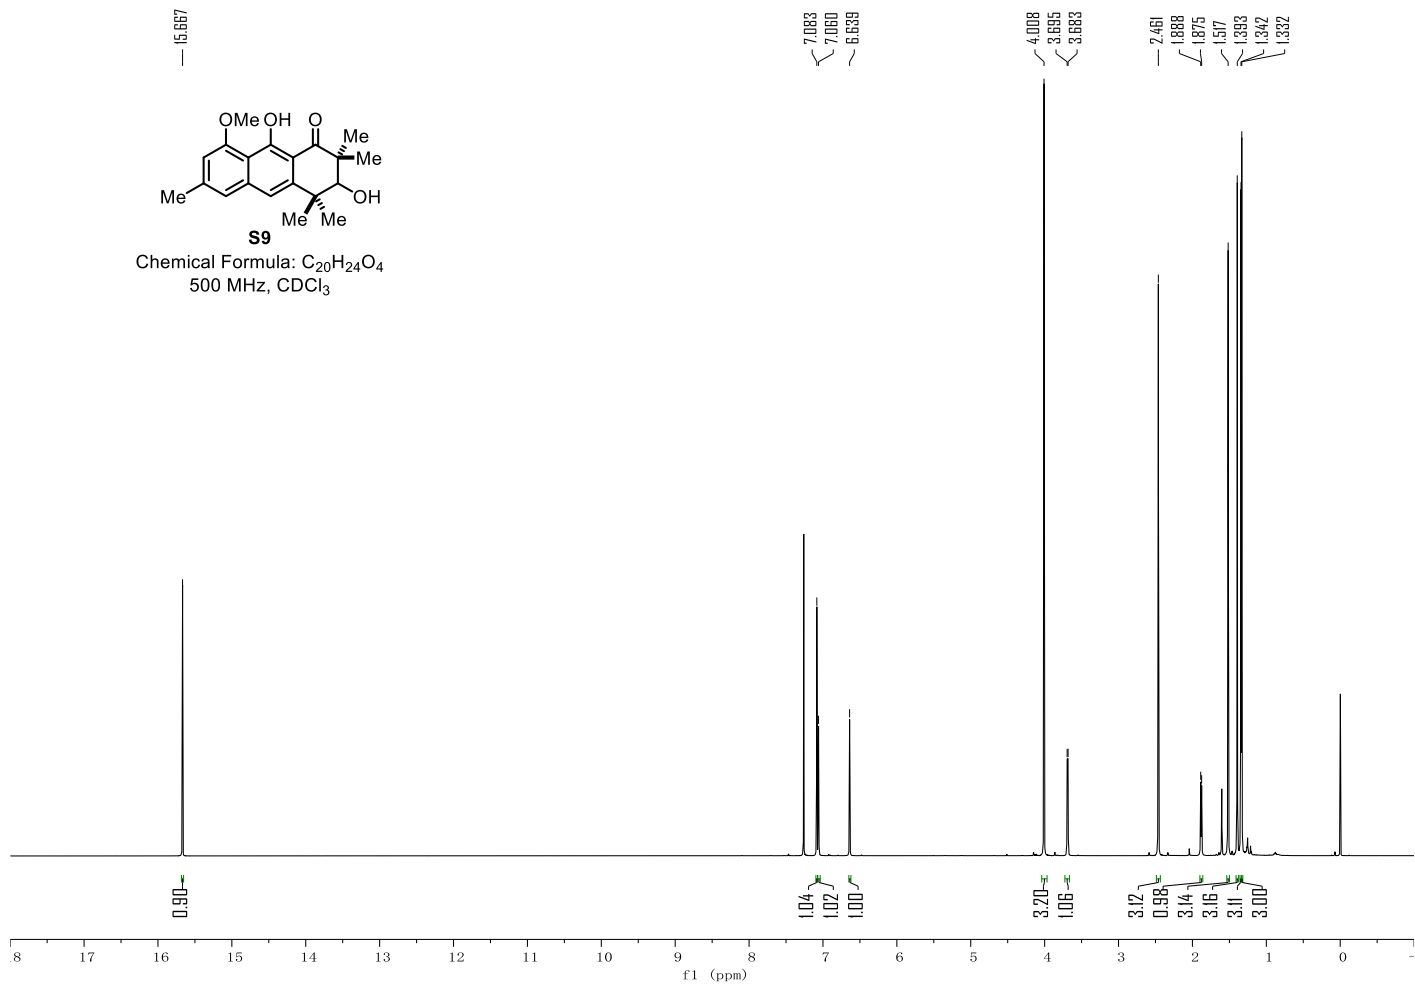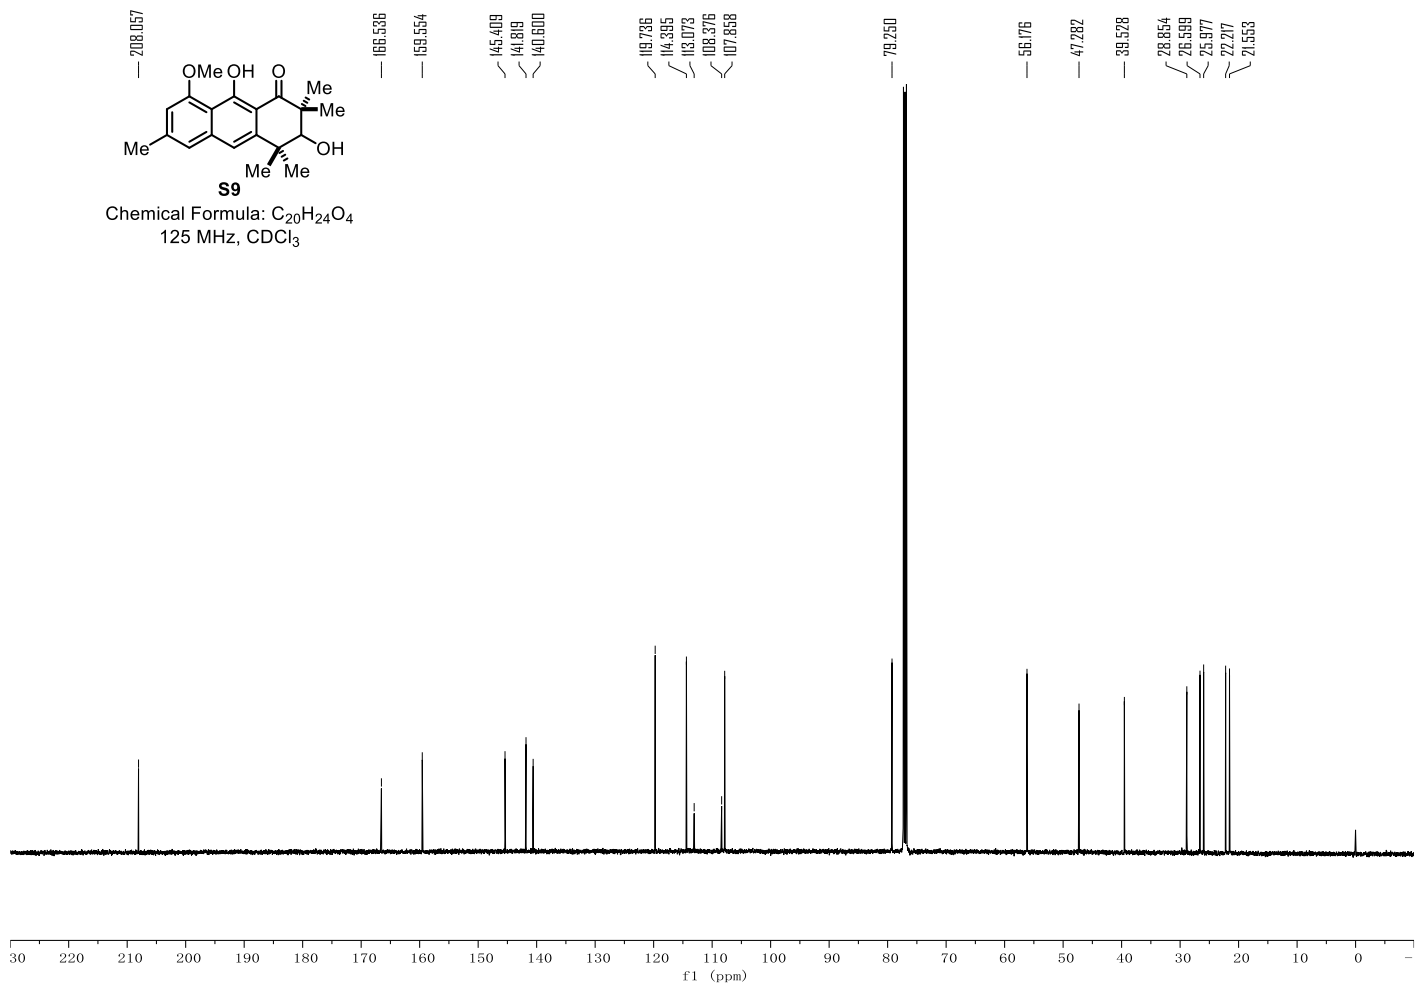

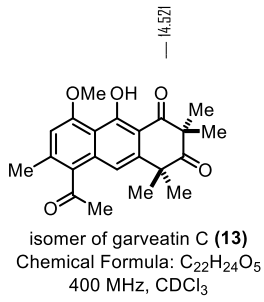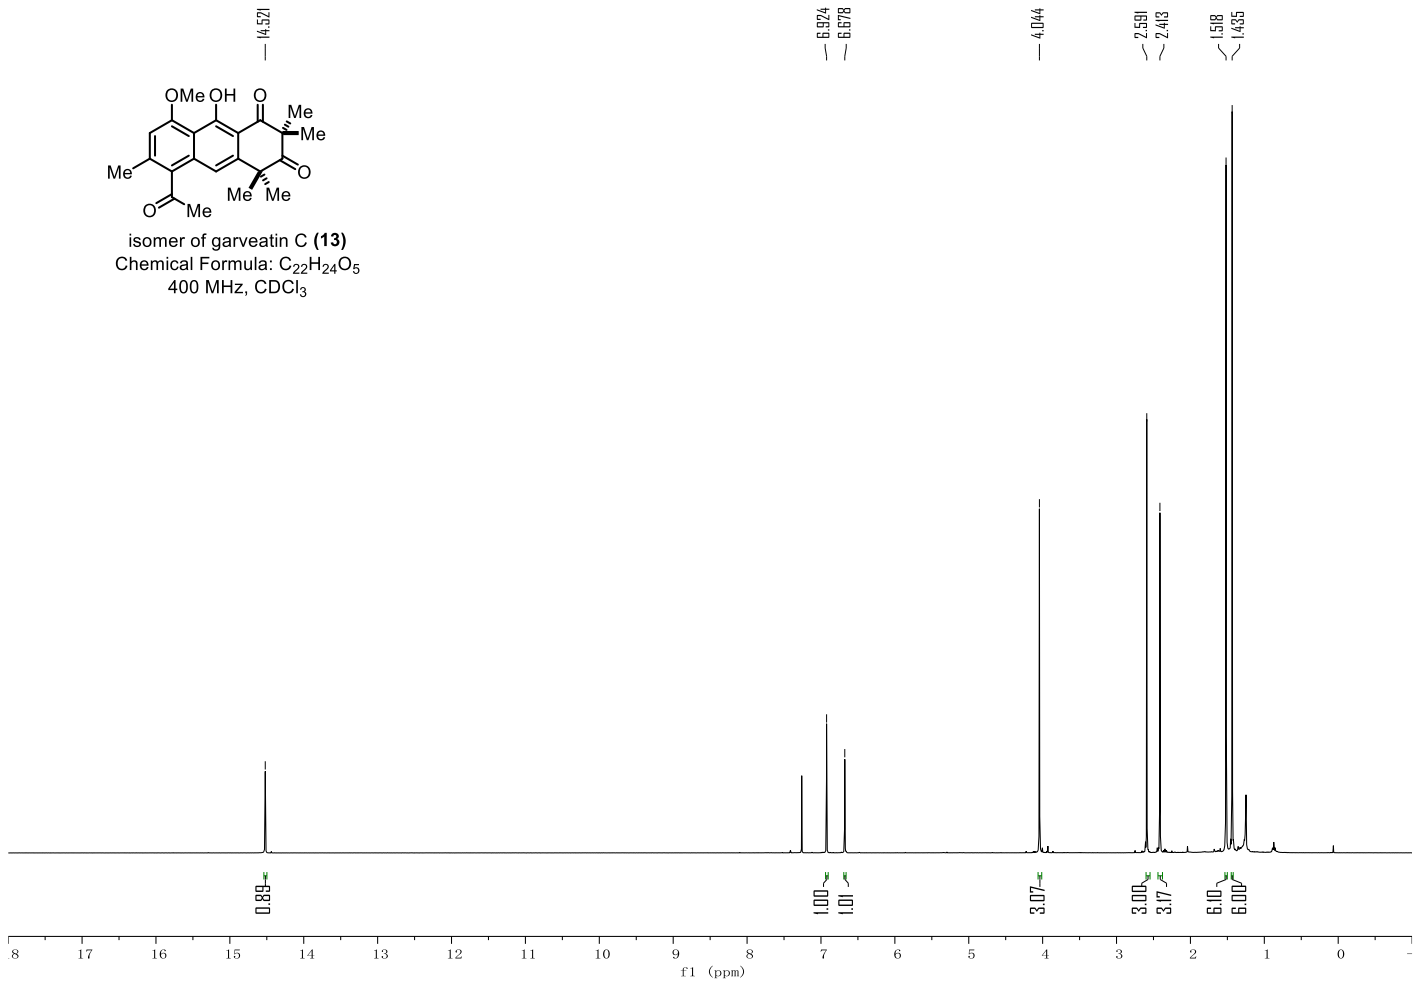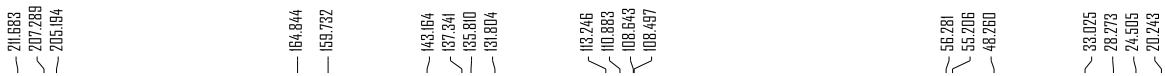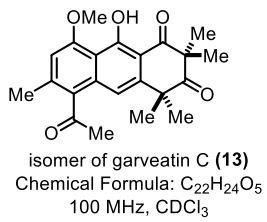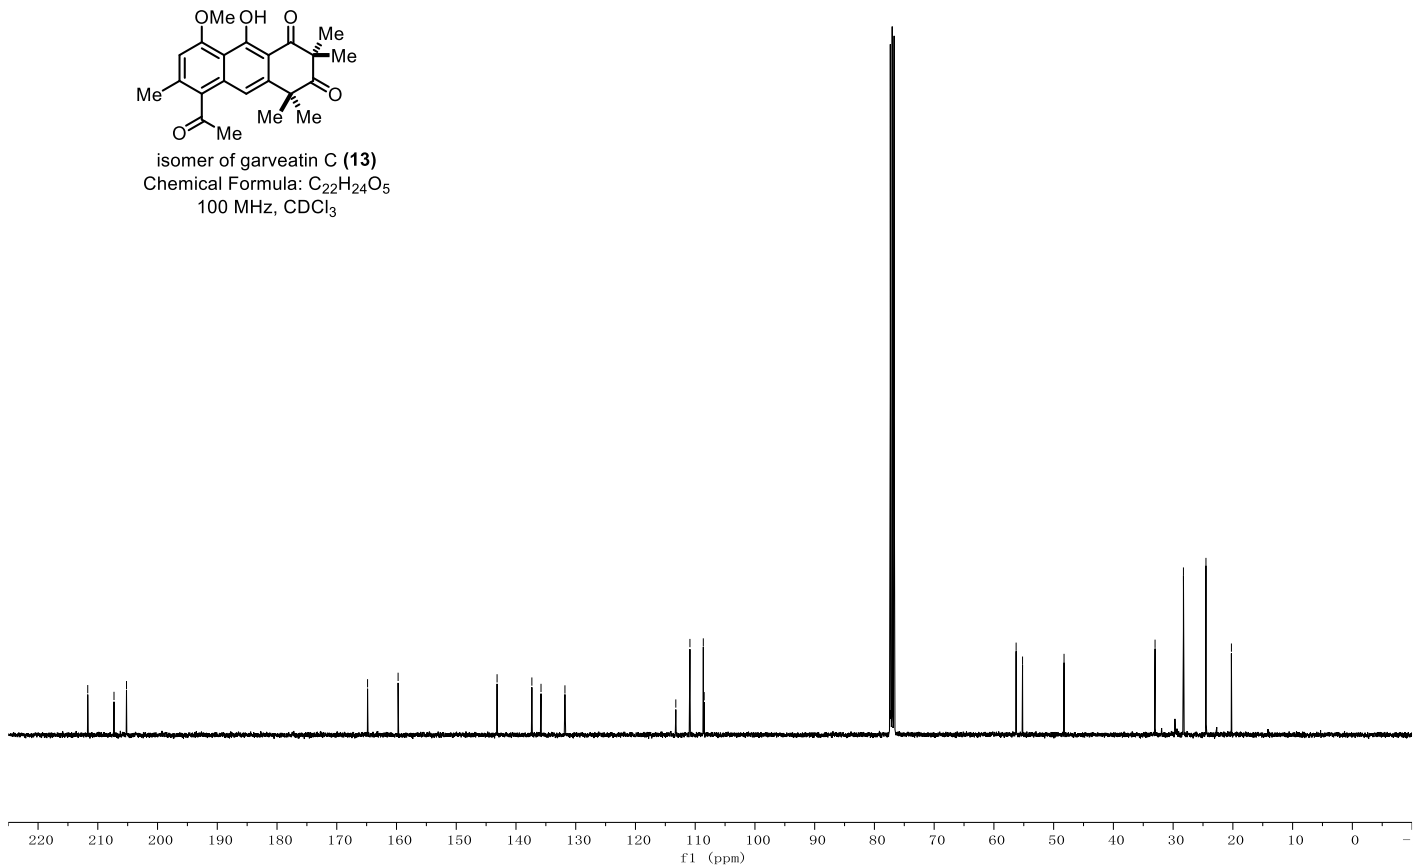

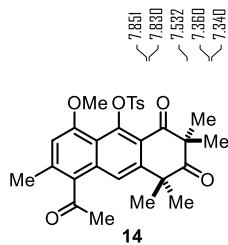

Chemical Formula: C<sub>29</sub>H<sub>30</sub>O<sub>7</sub>S  
400 MHz, CDCl<sub>3</sub>

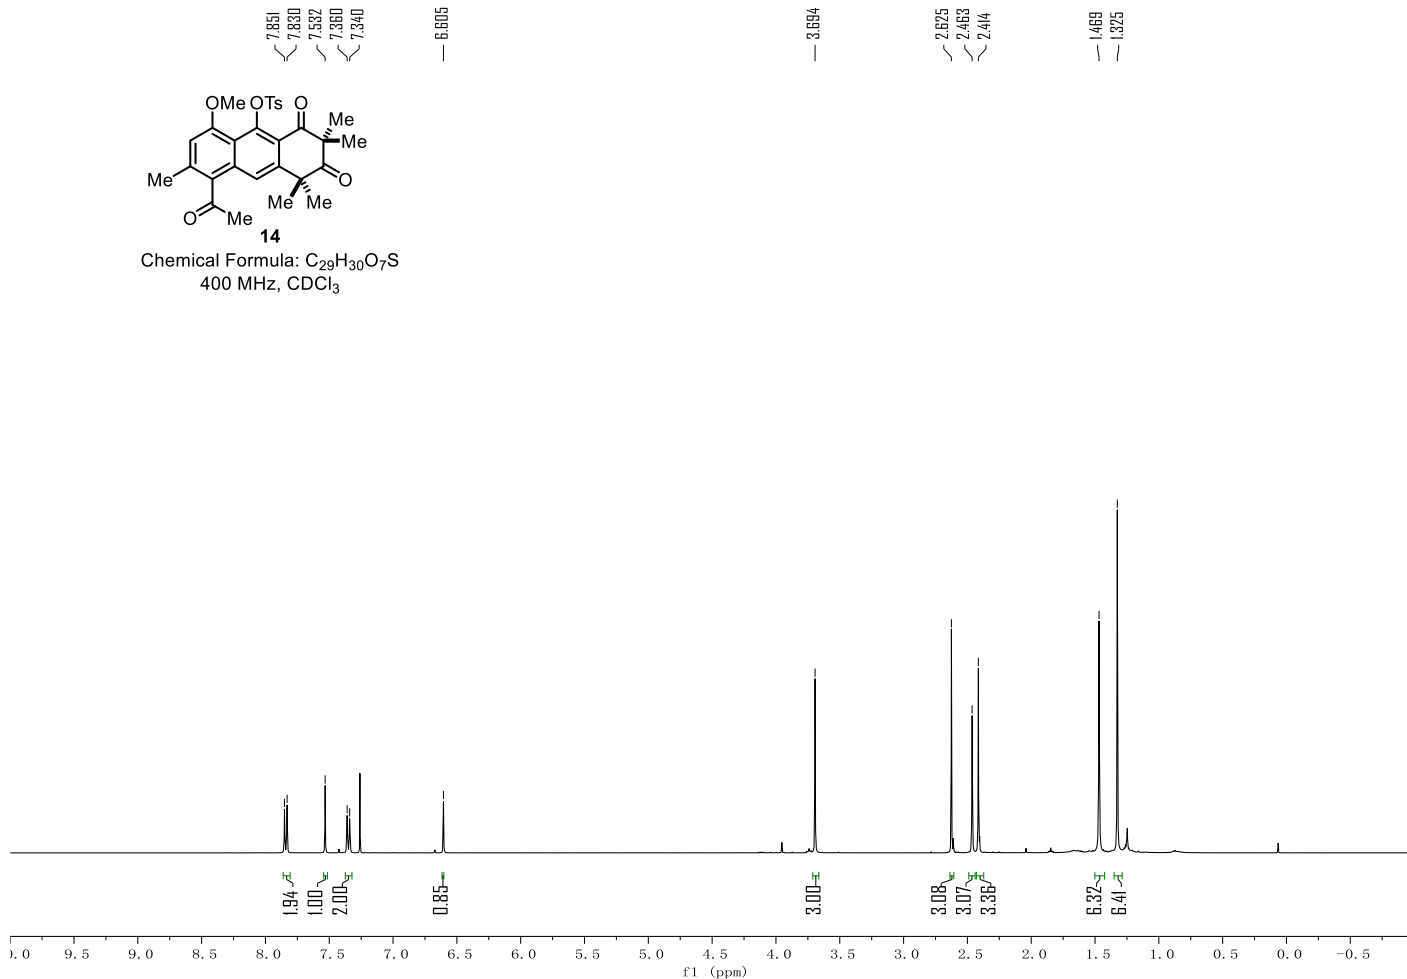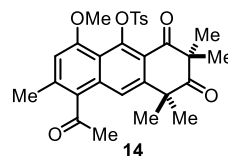

Chemical Formula: C<sub>29</sub>H<sub>30</sub>O<sub>7</sub>S  
100 MHz, CDCl<sub>3</sub>

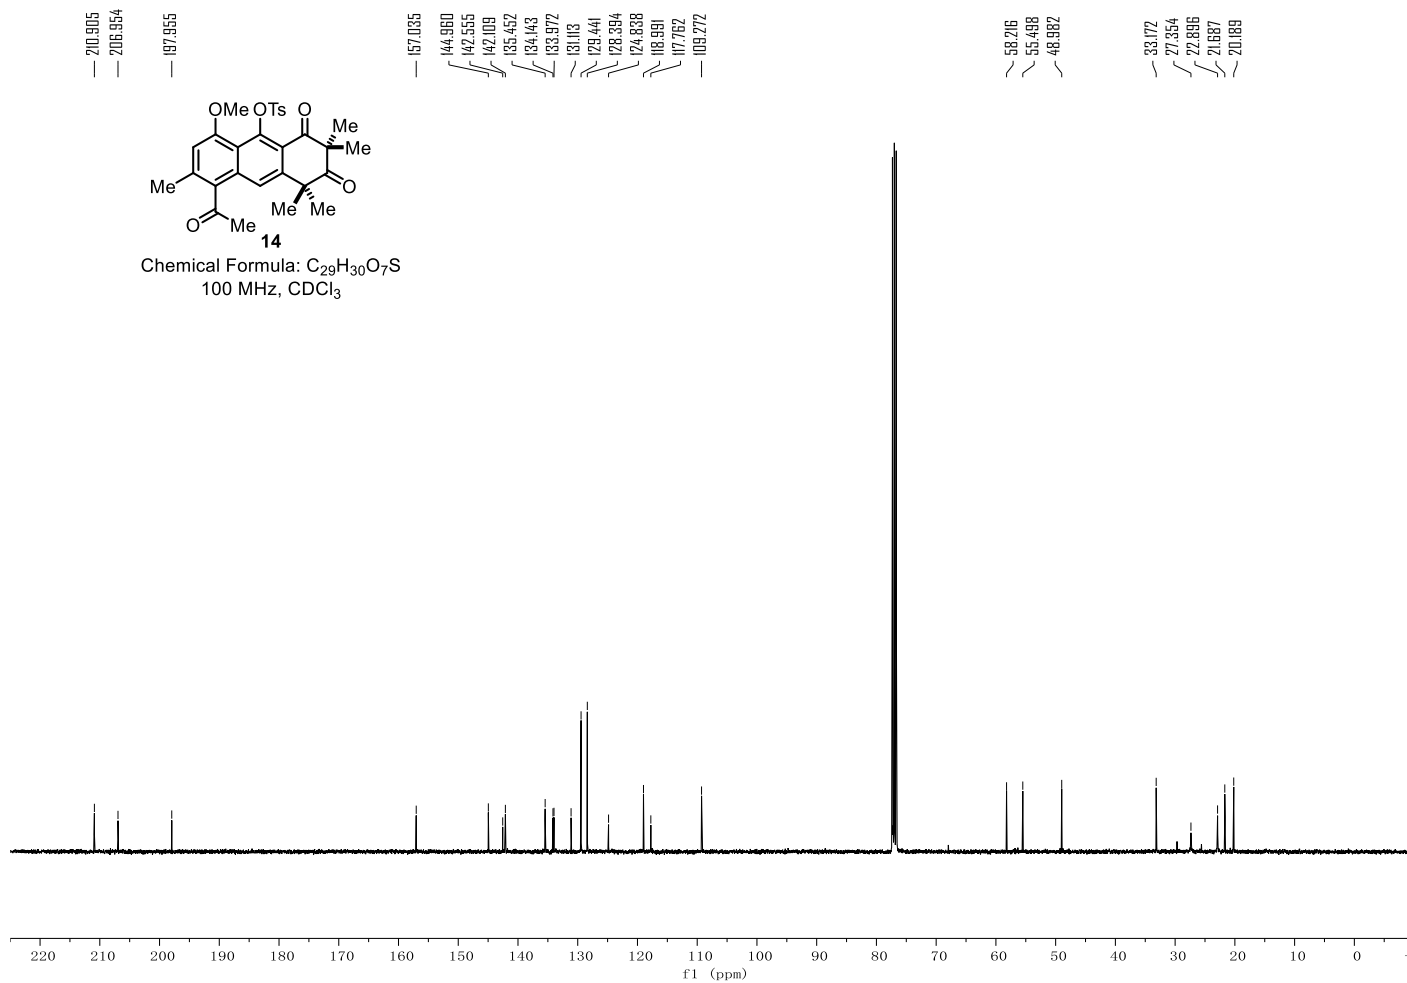

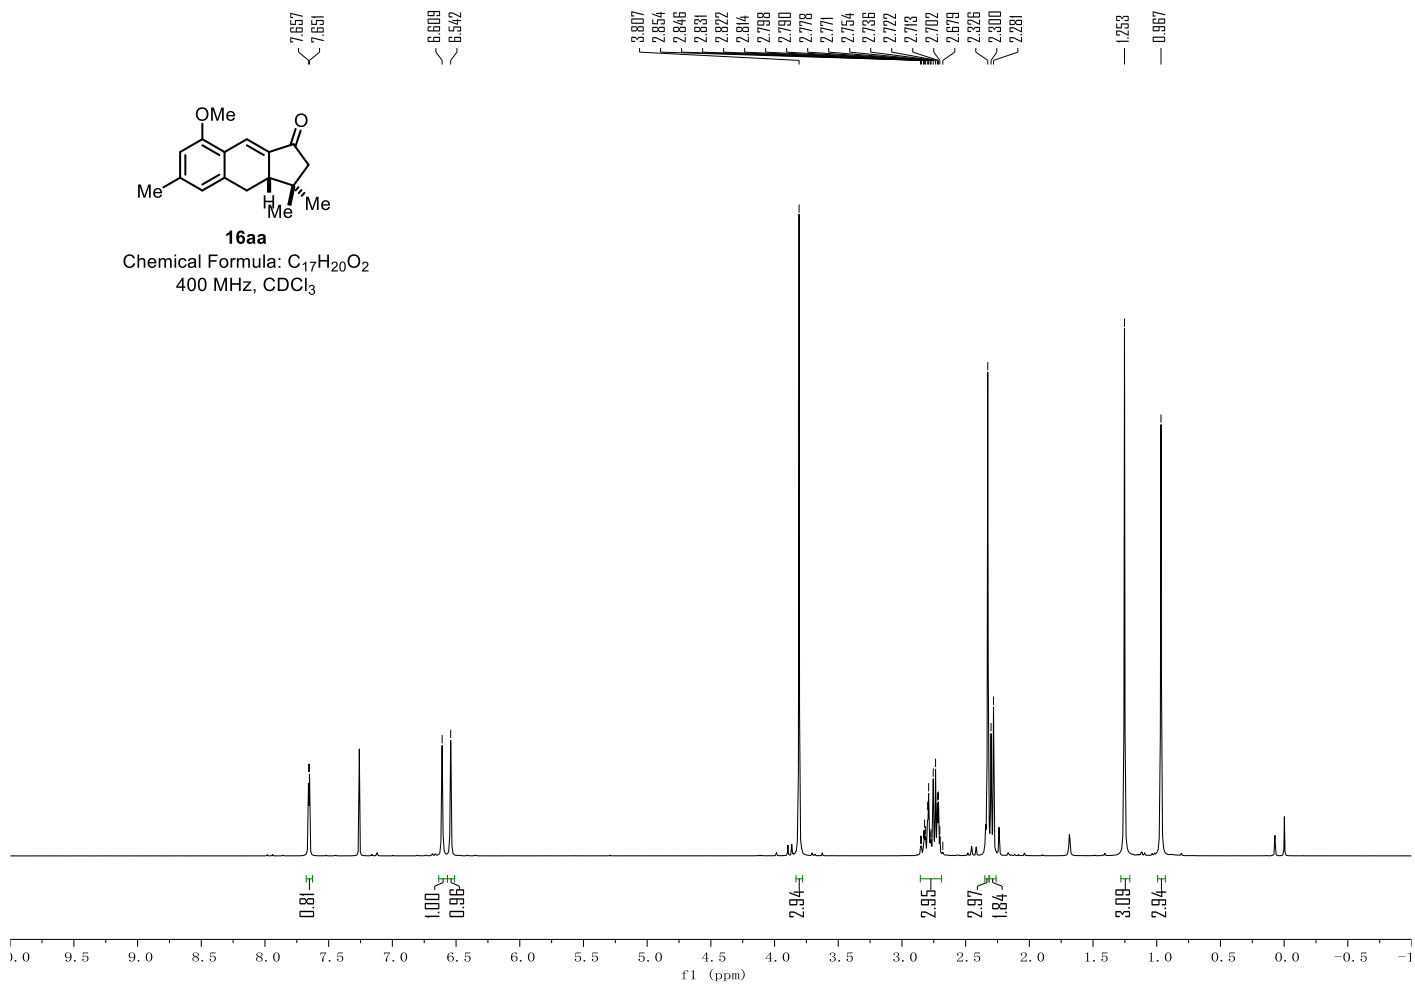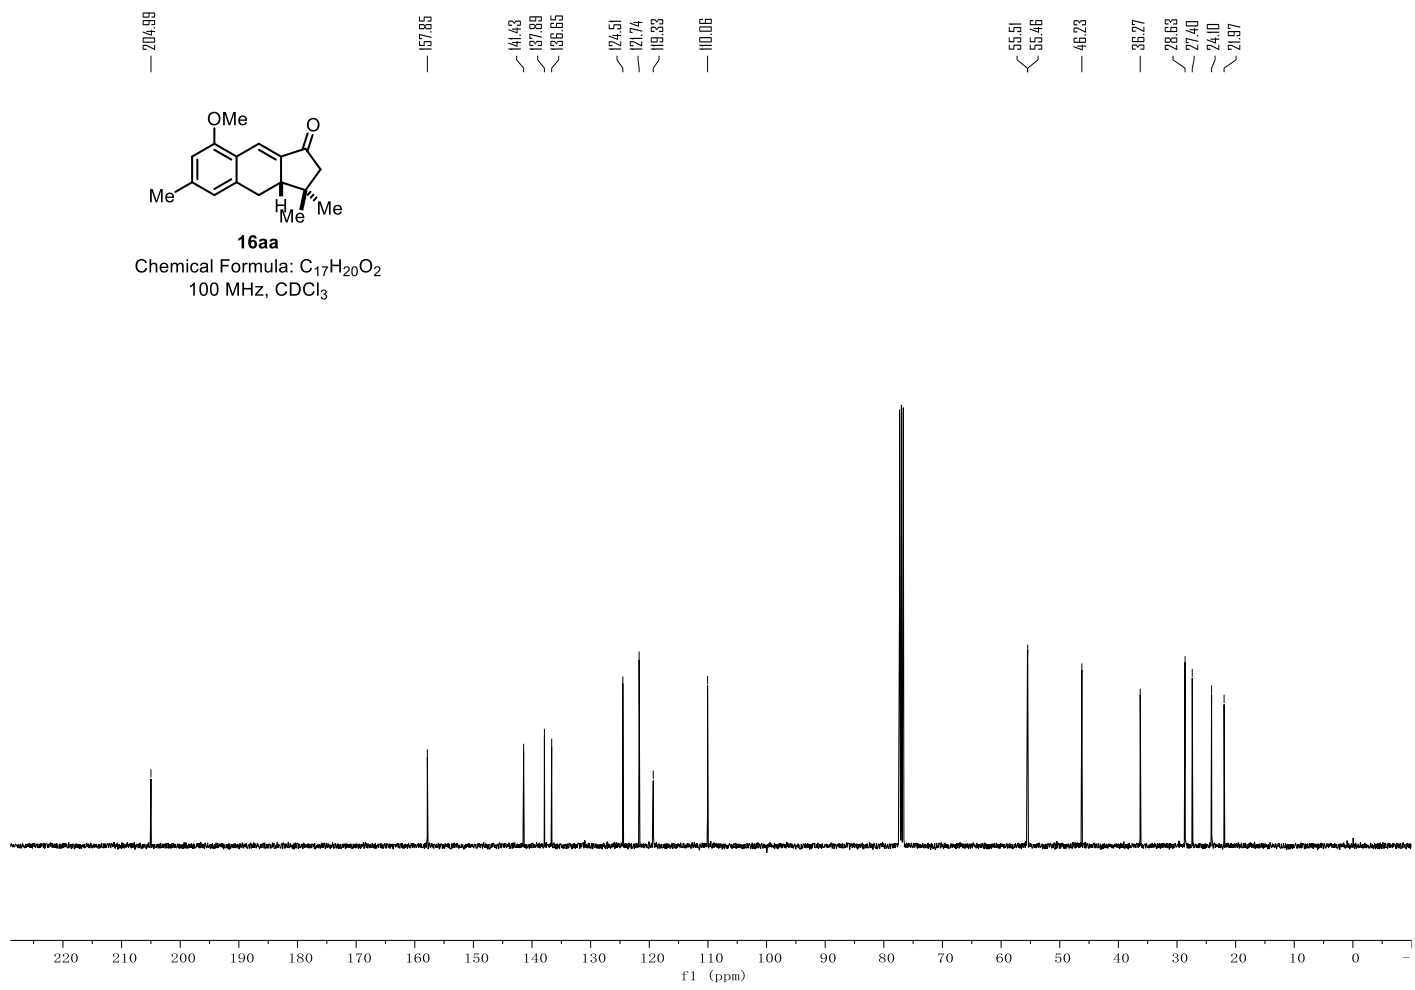

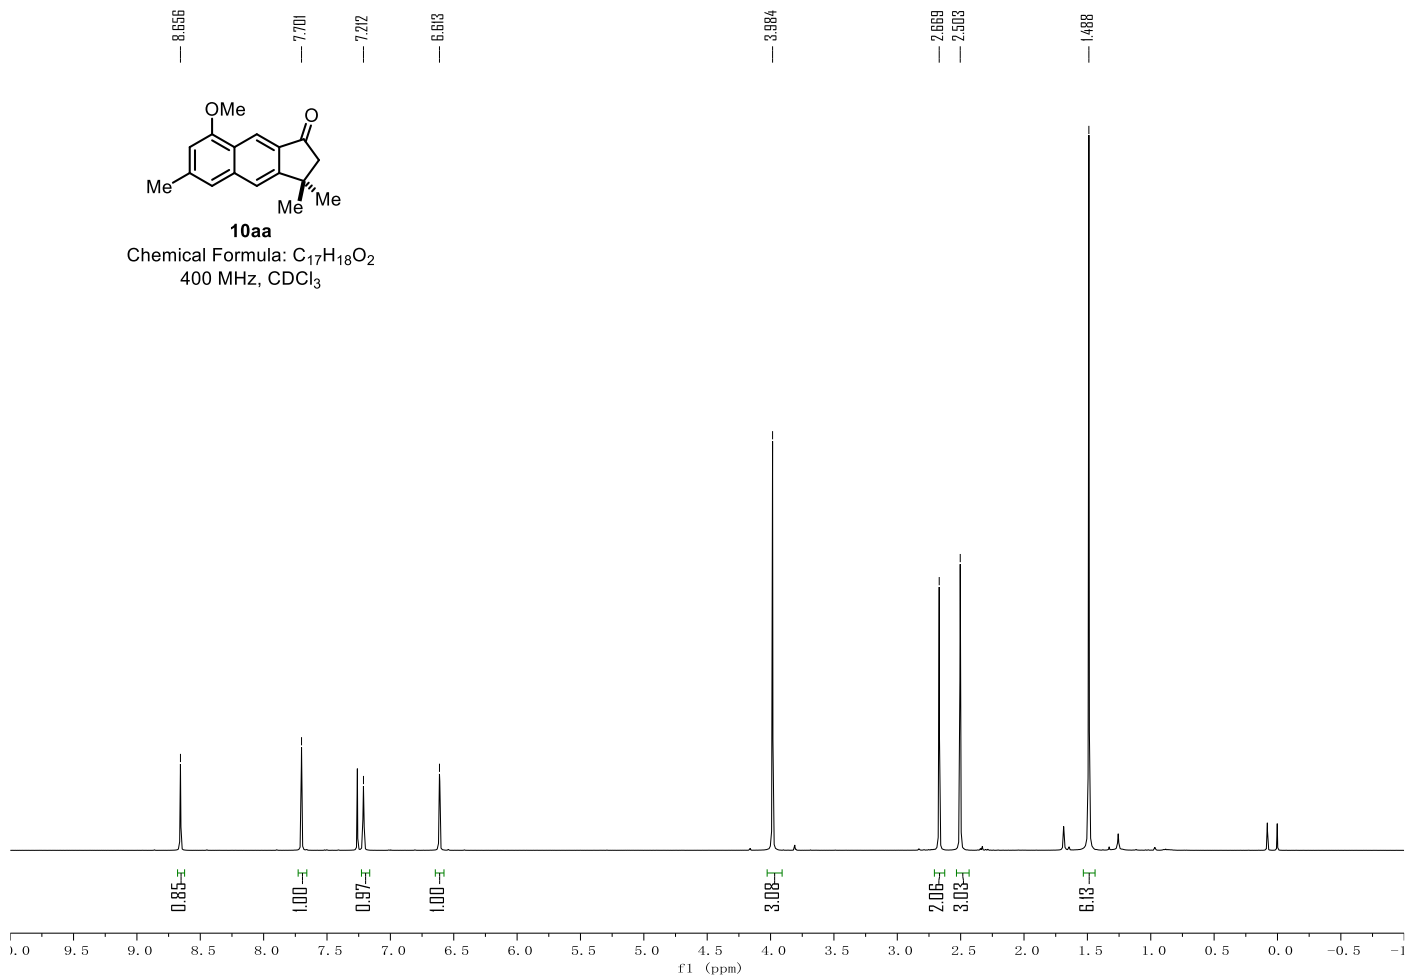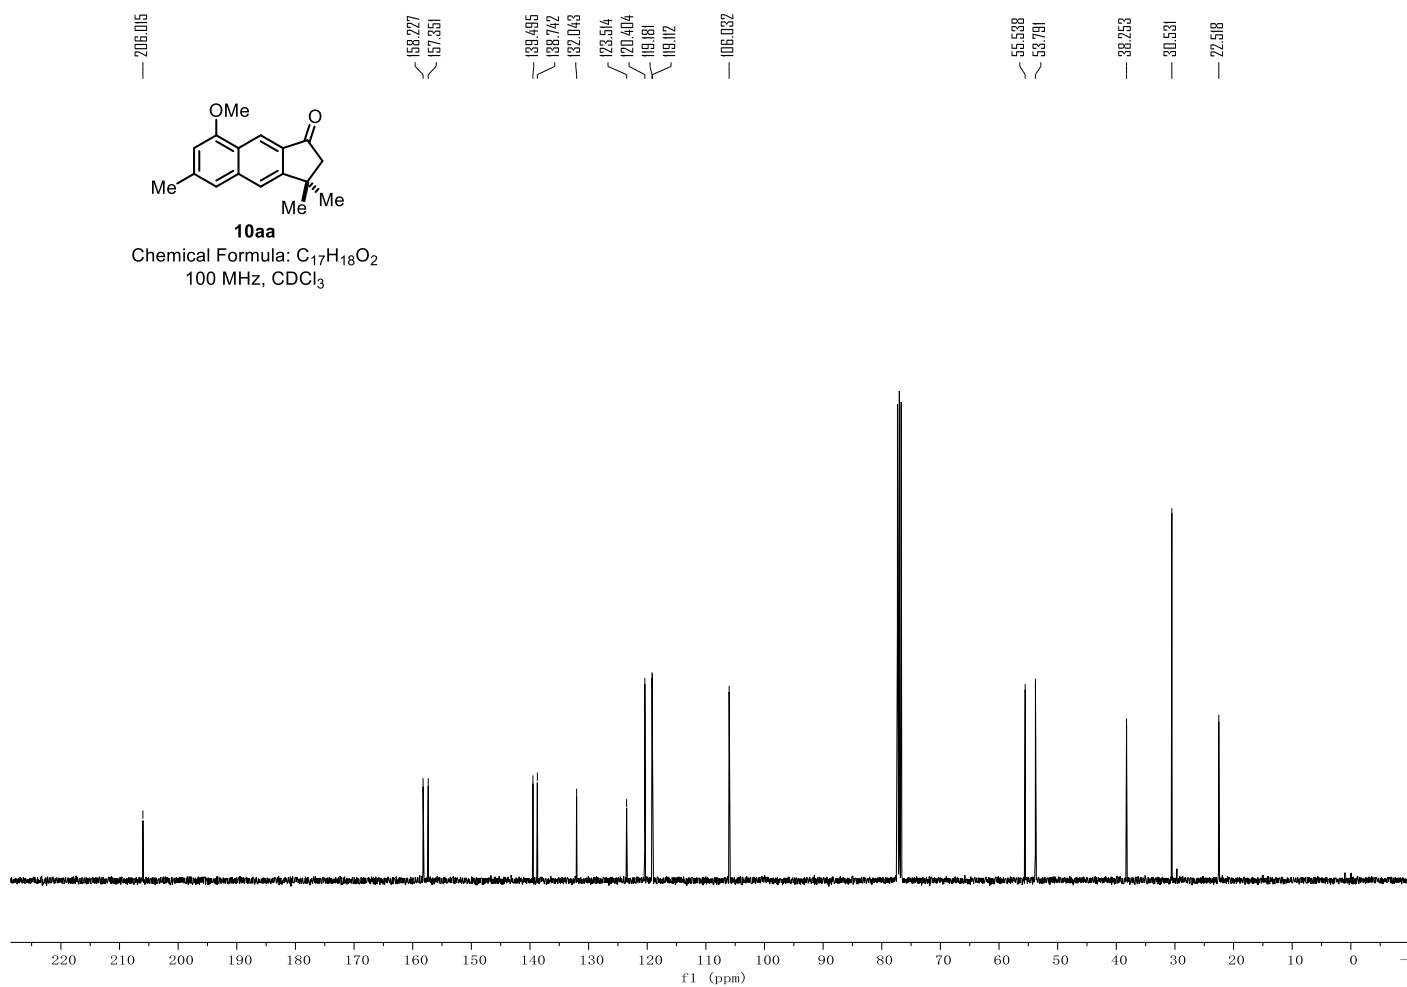



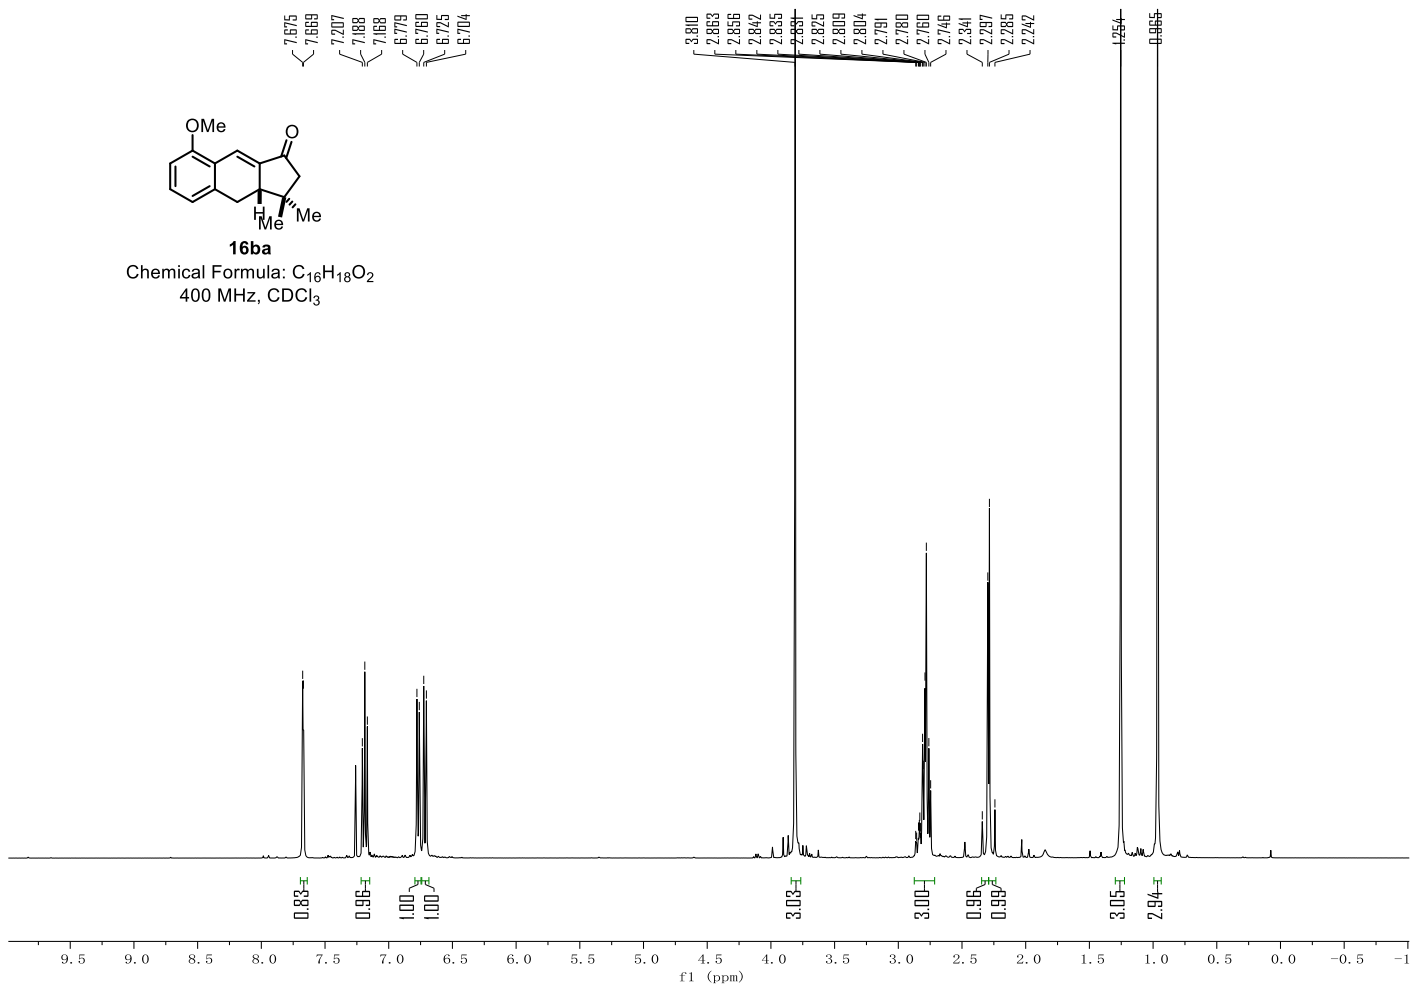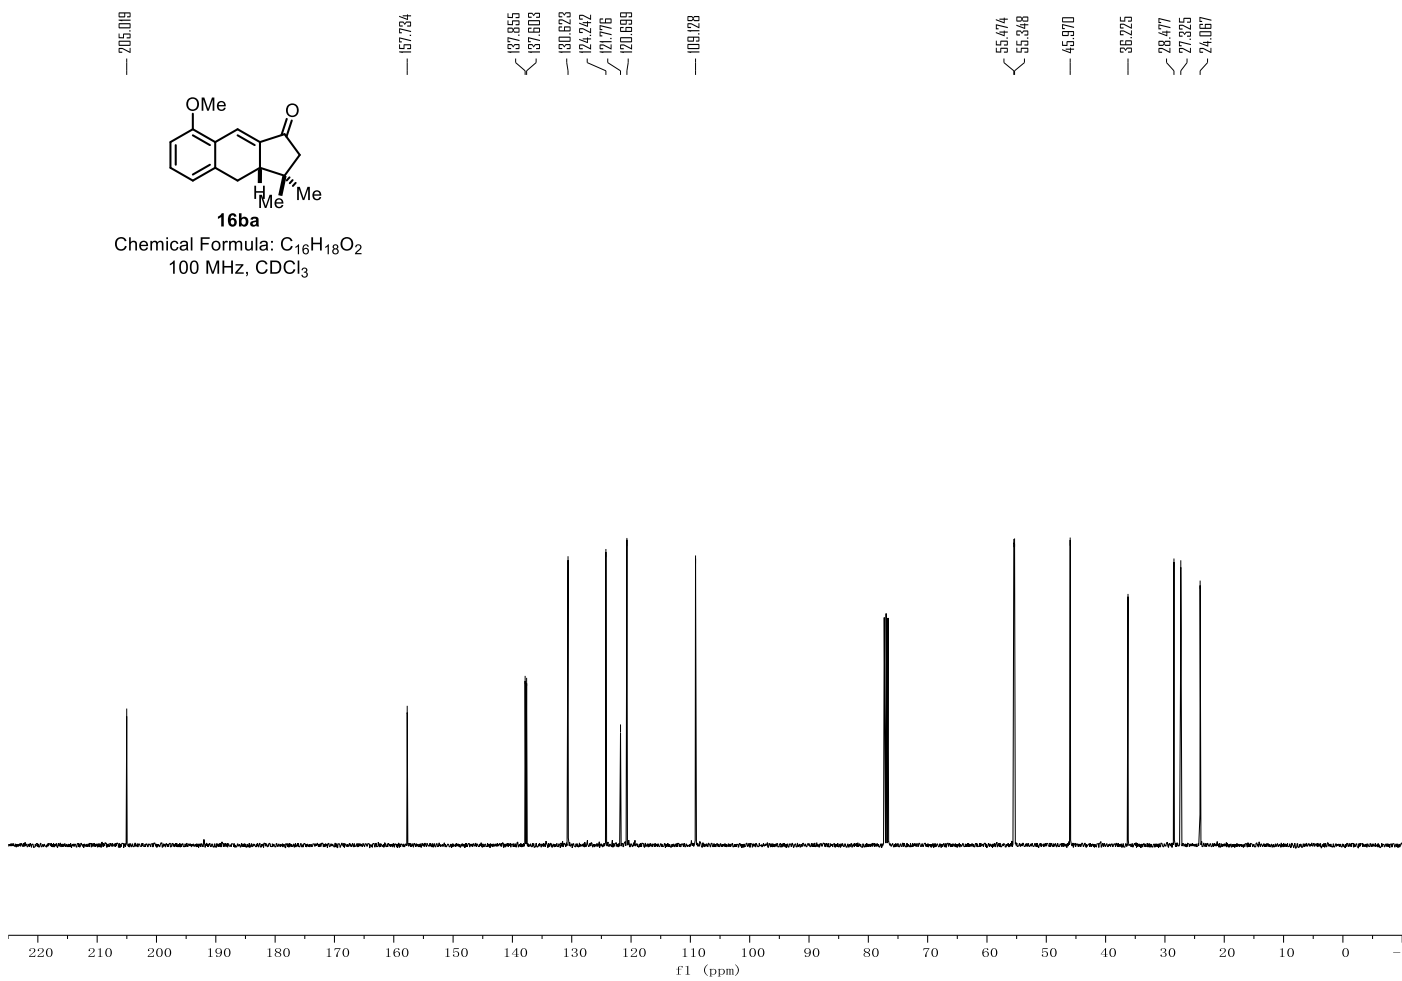

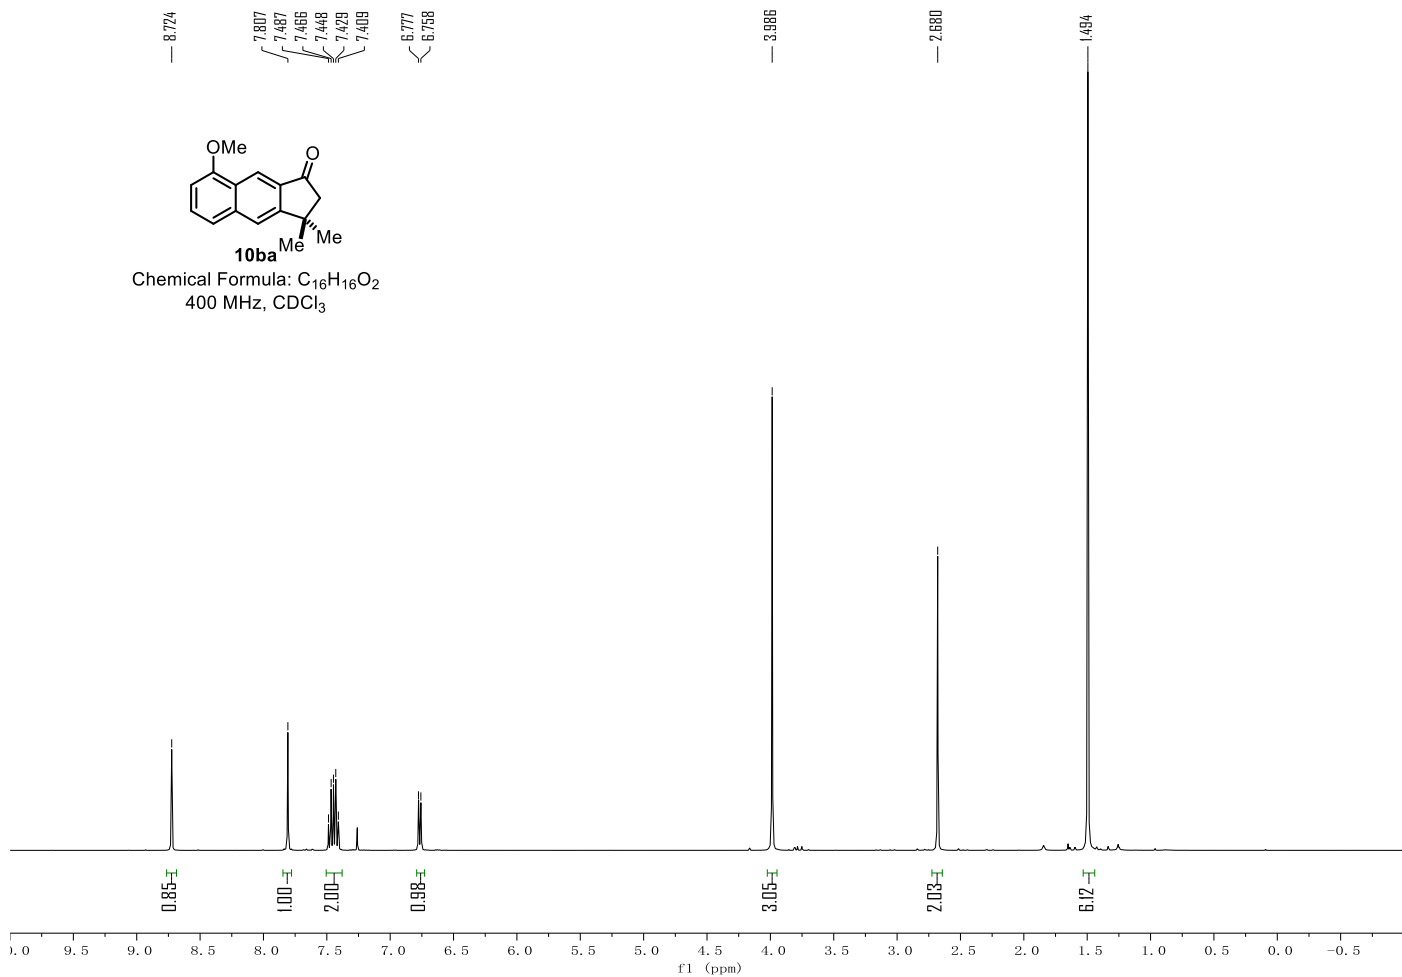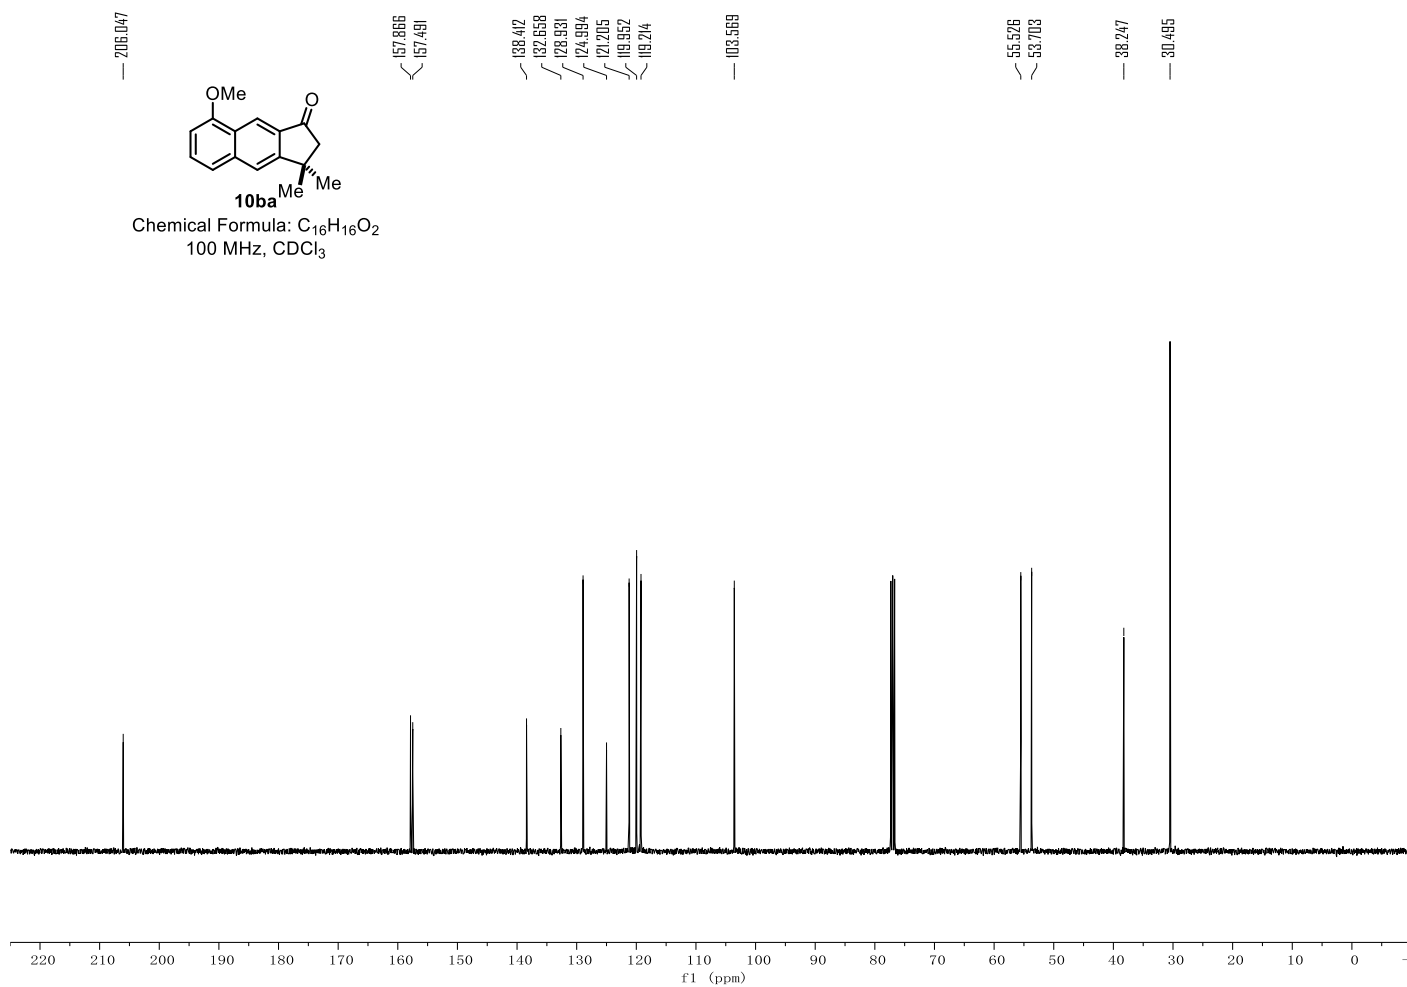

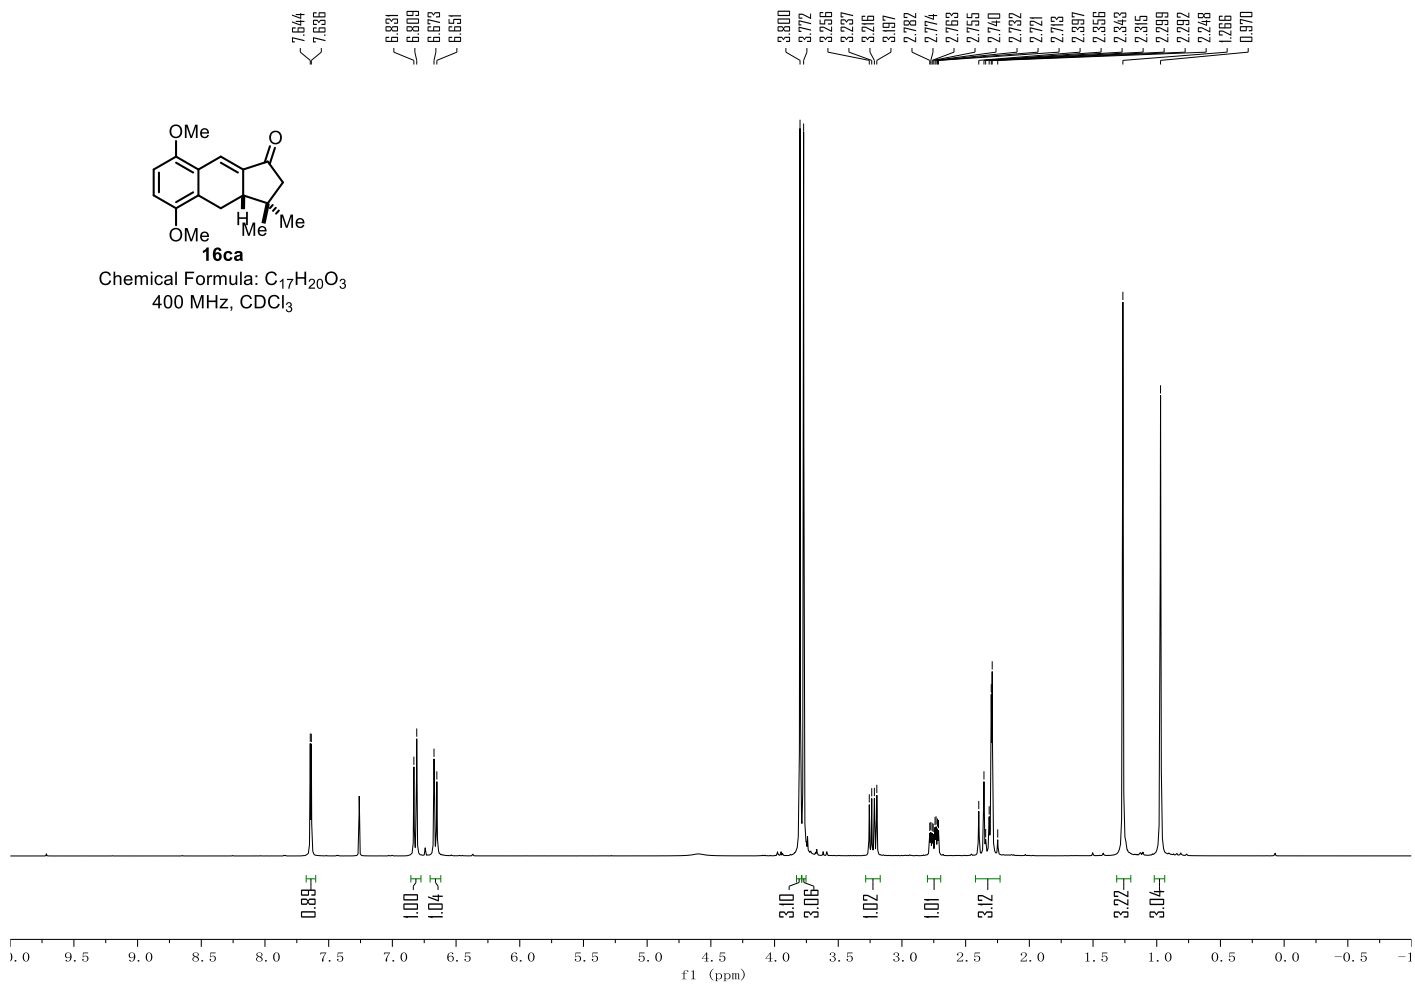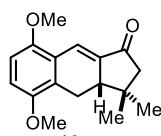

**16ca**  
 Chemical Formula: C<sub>17</sub>H<sub>20</sub>O<sub>3</sub>  
 400 MHz, CDCl<sub>3</sub>

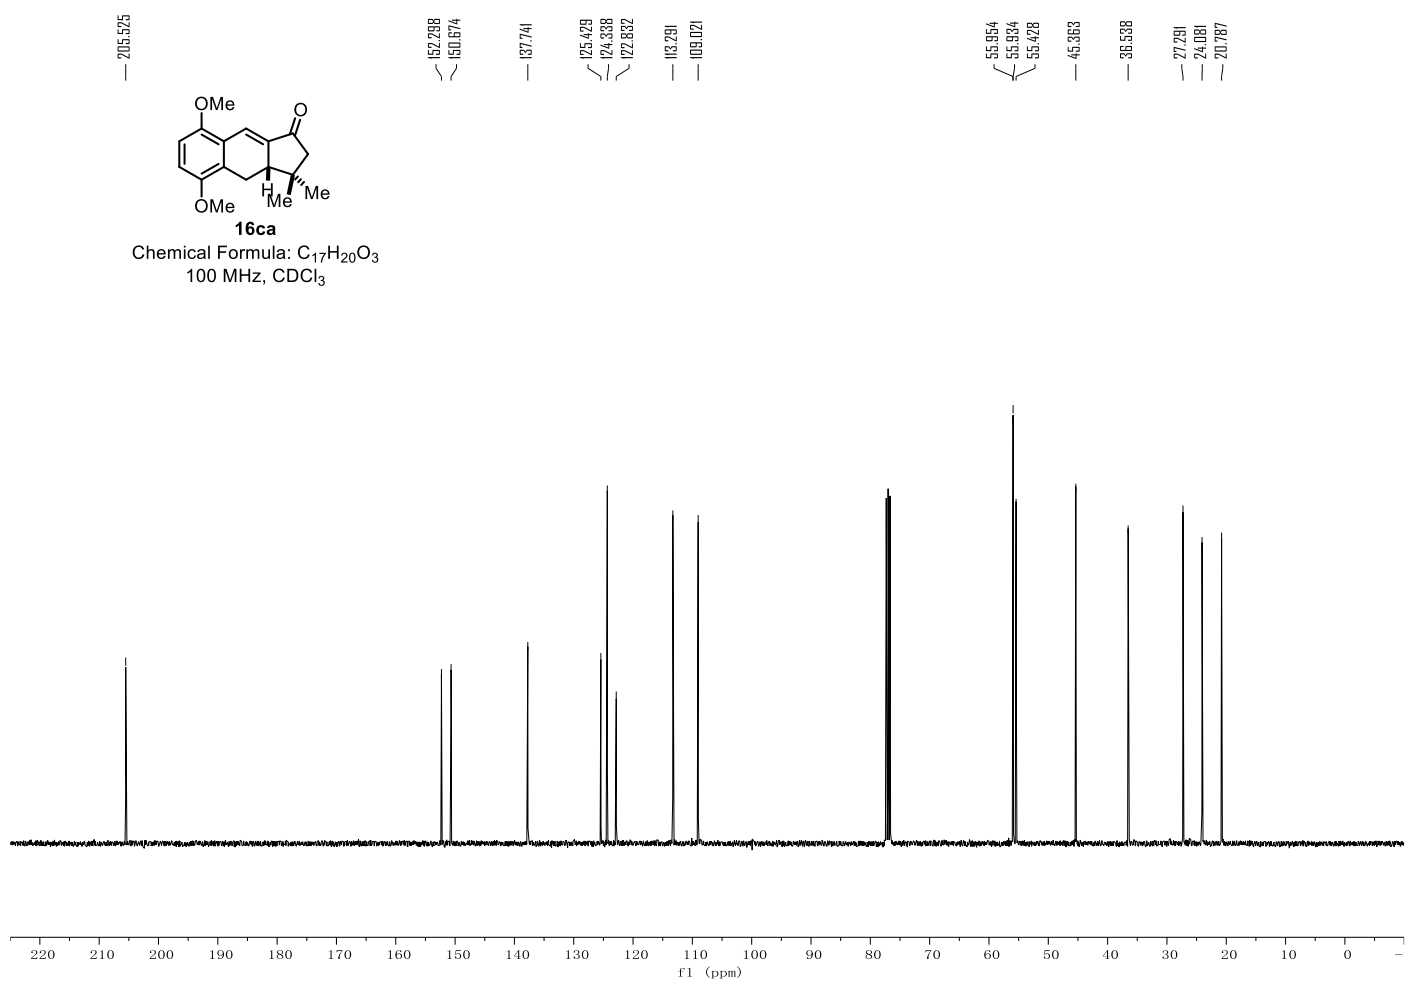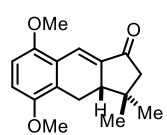

**16ca**  
 Chemical Formula: C<sub>17</sub>H<sub>20</sub>O<sub>3</sub>  
 100 MHz, CDCl<sub>3</sub>

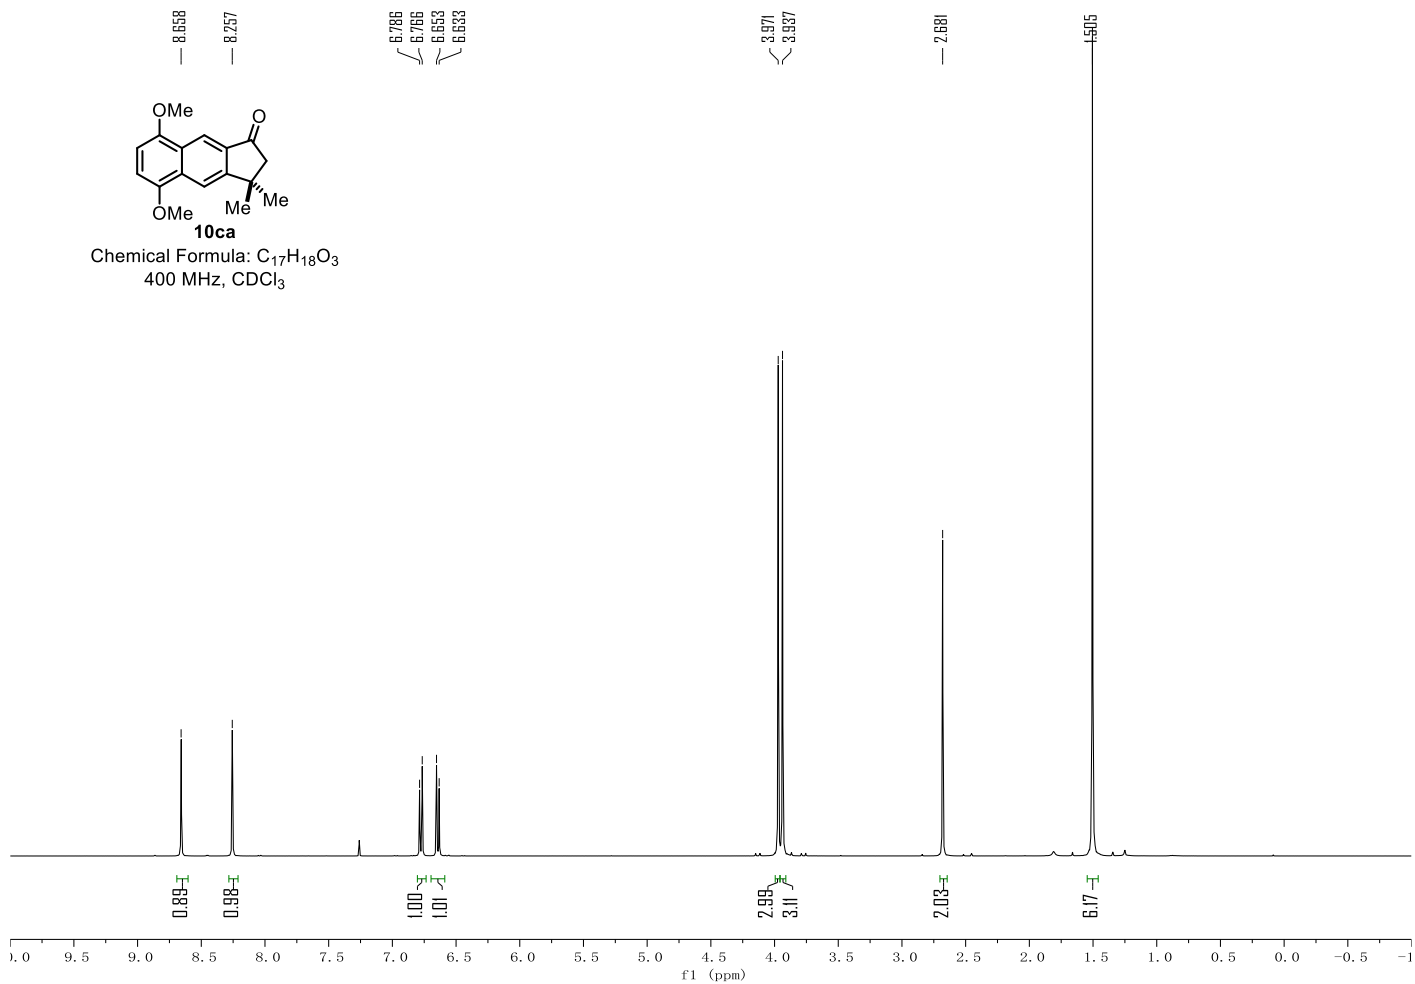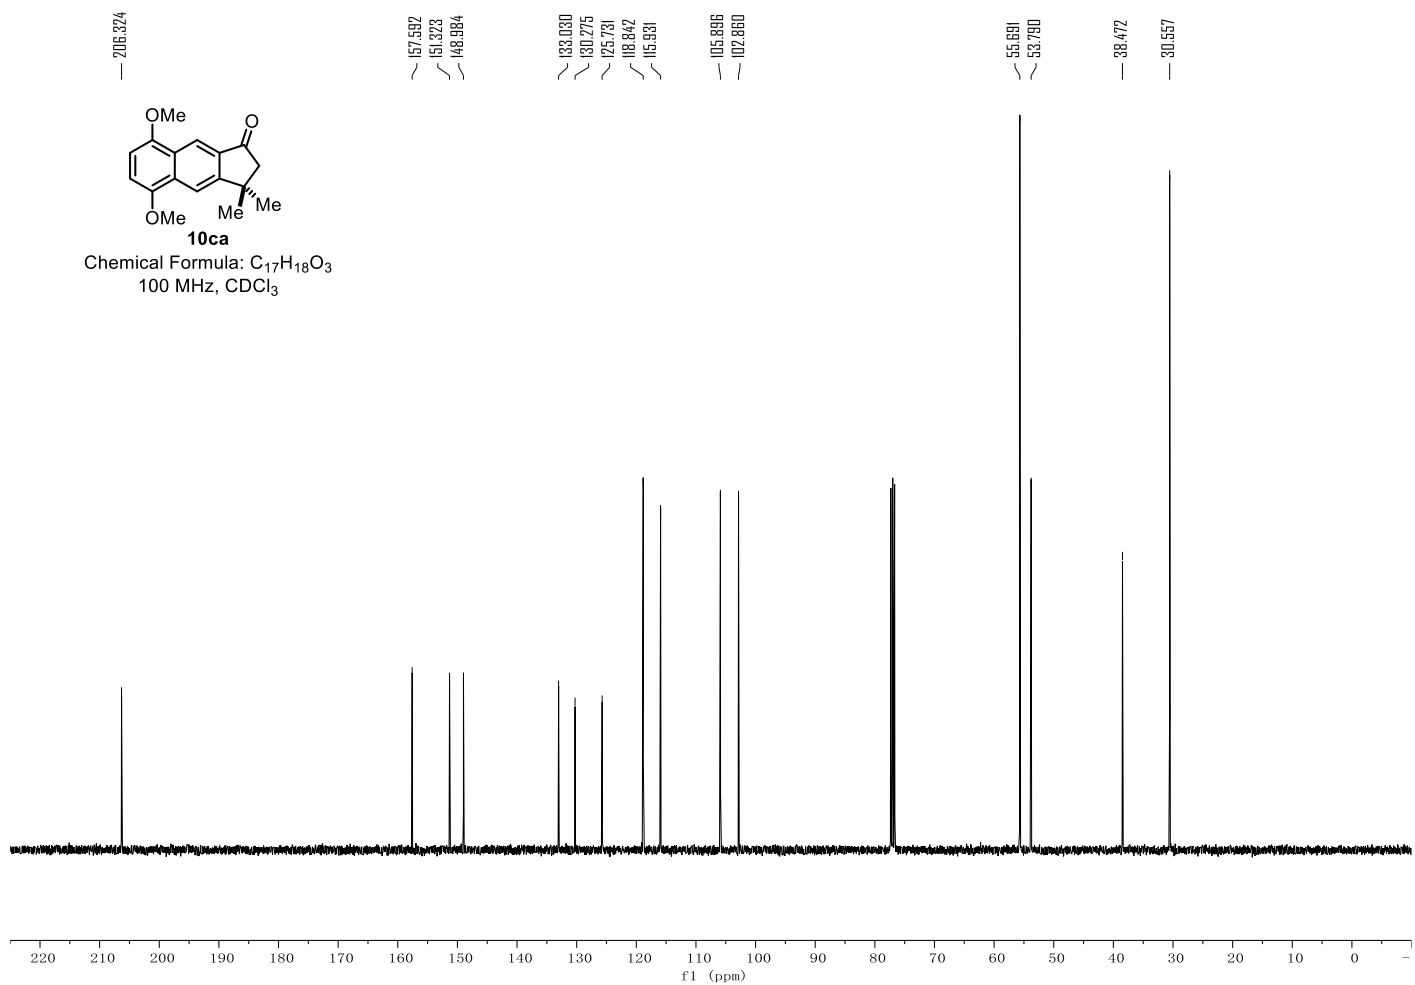

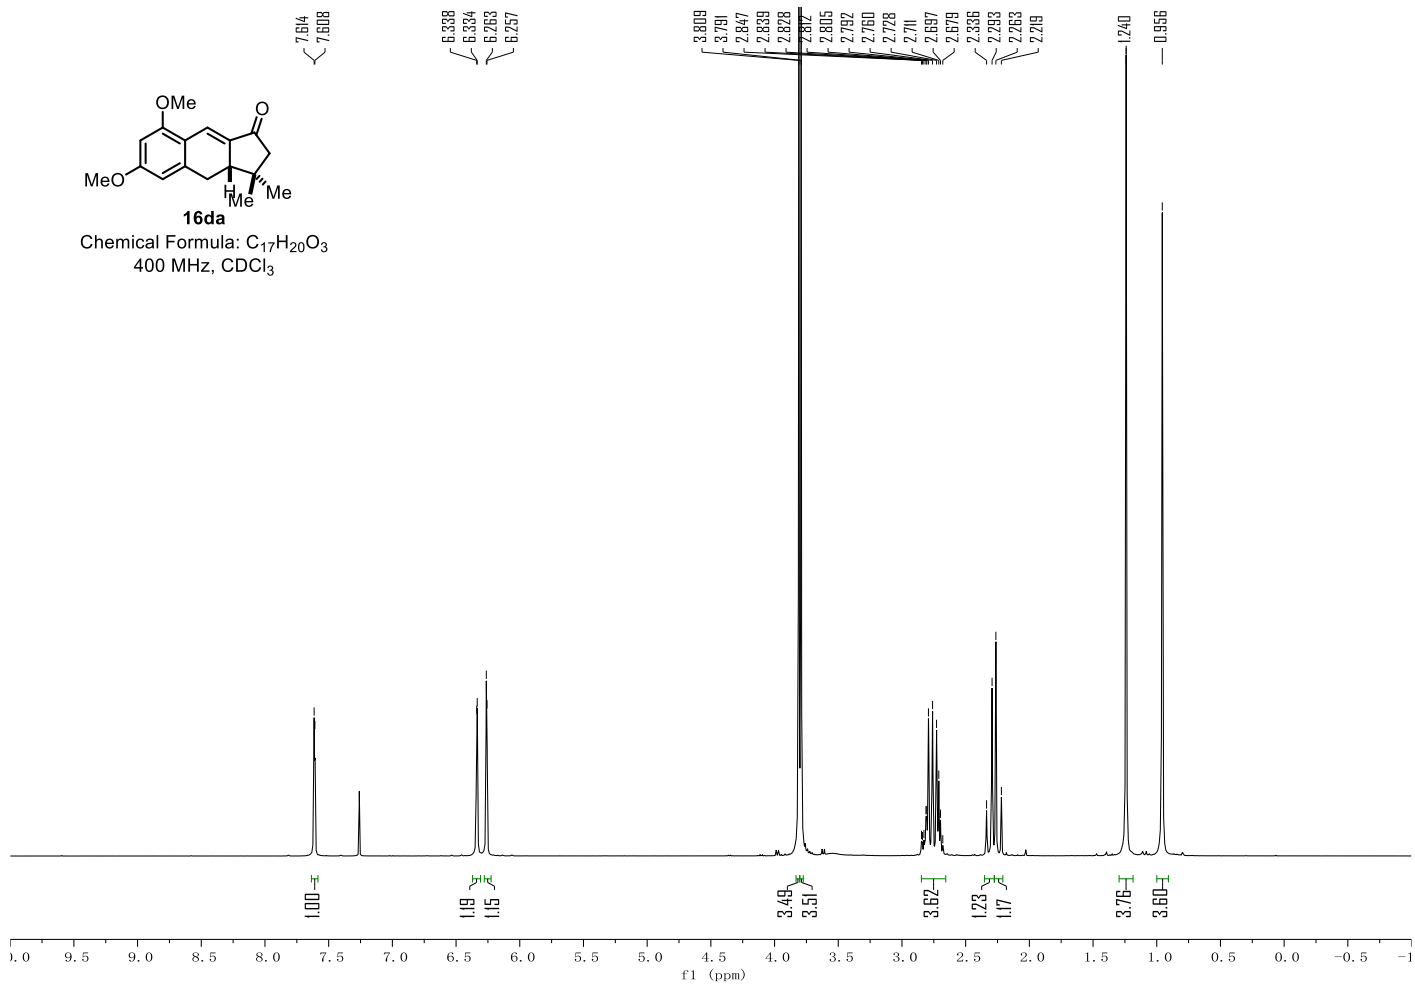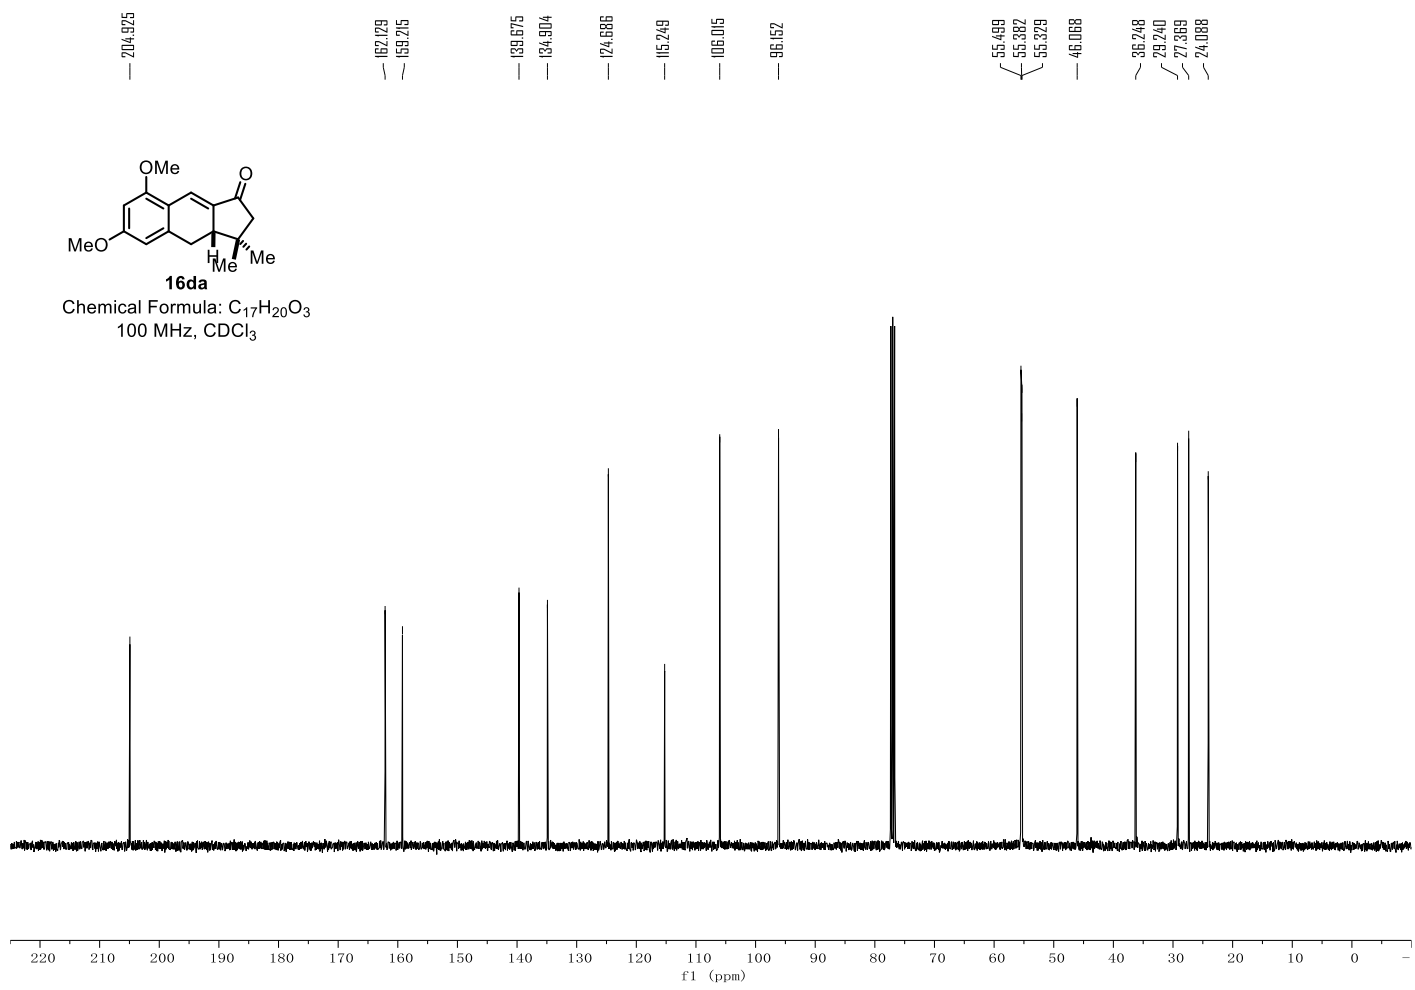

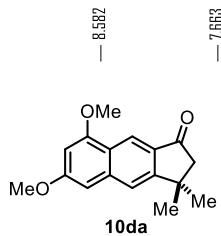

Chemical Formula: C<sub>17</sub>H<sub>18</sub>O<sub>3</sub>  
400 MHz, CDCl<sub>3</sub>

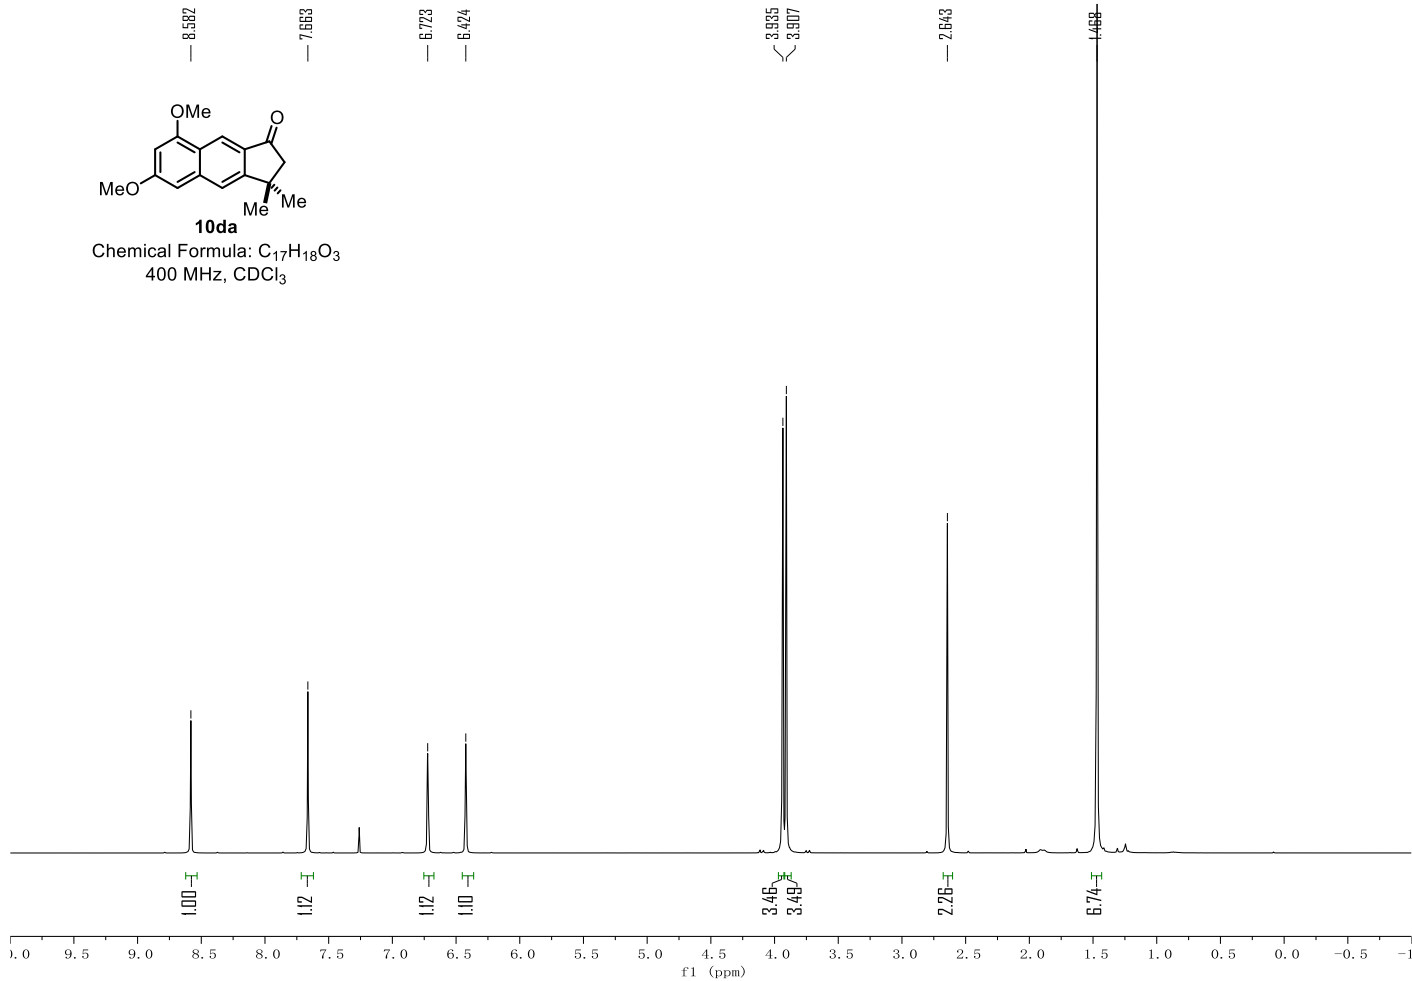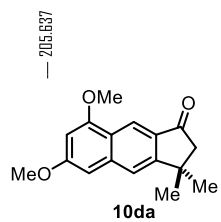

Chemical Formula: C<sub>17</sub>H<sub>18</sub>O<sub>3</sub>  
100 MHz, CDCl<sub>3</sub>

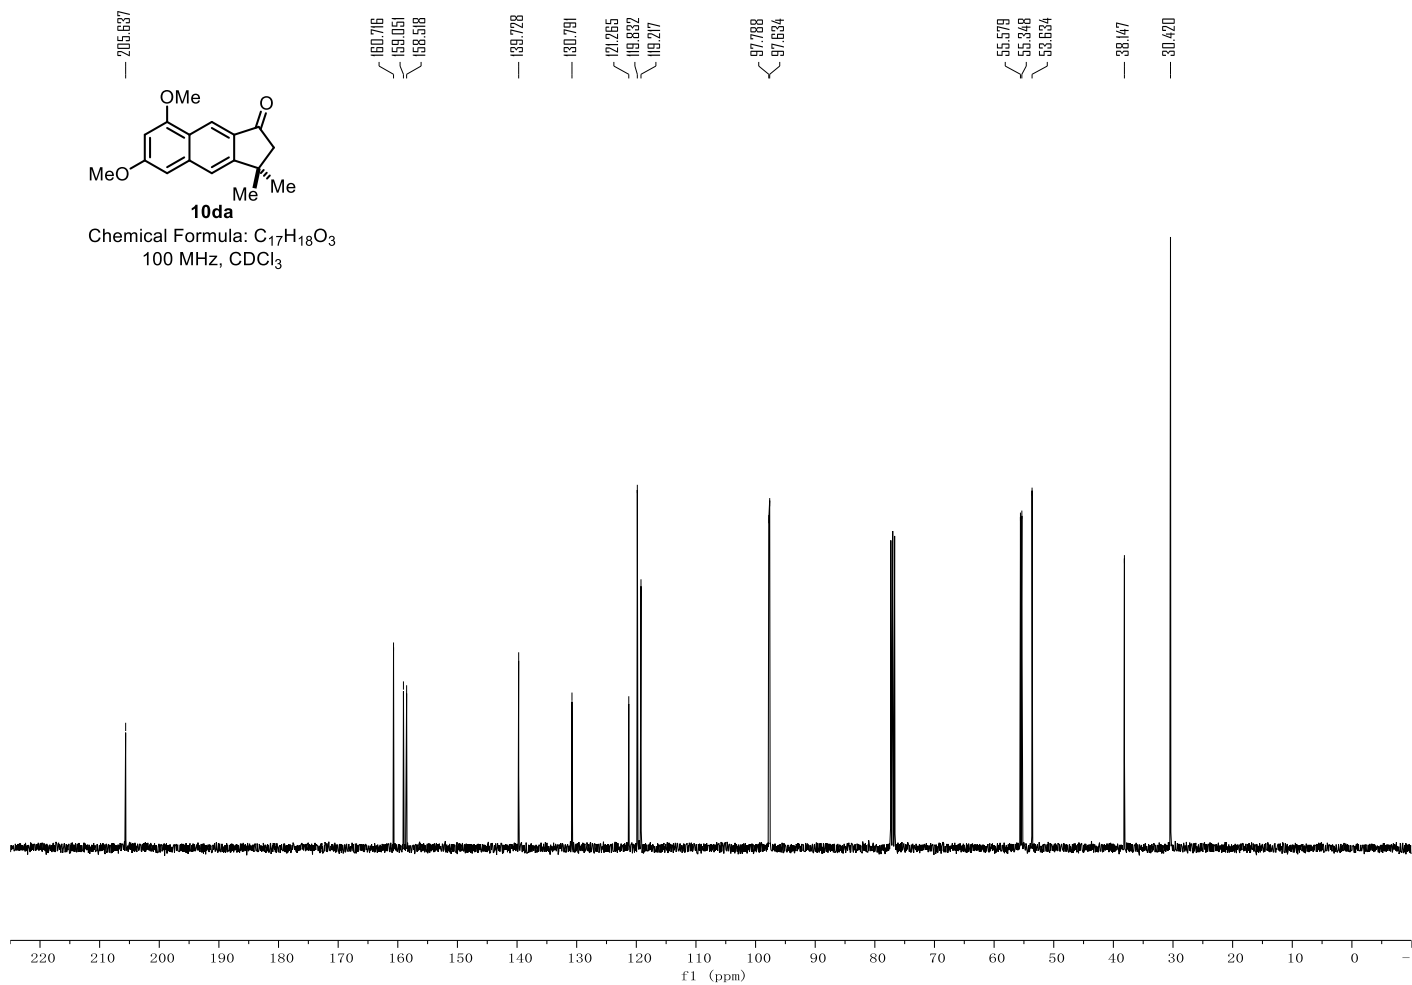

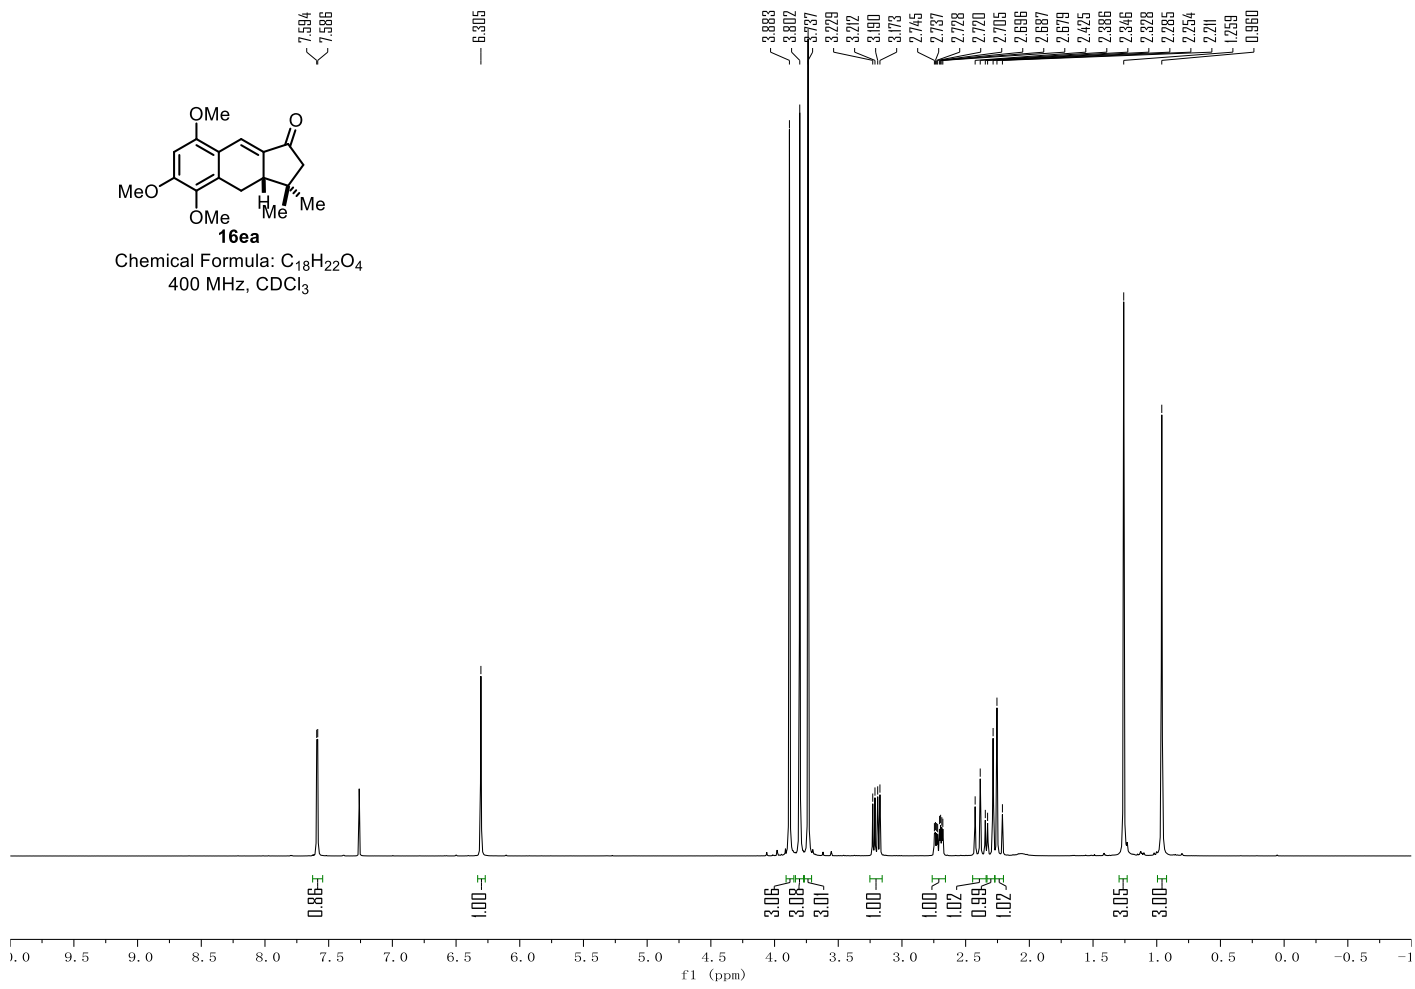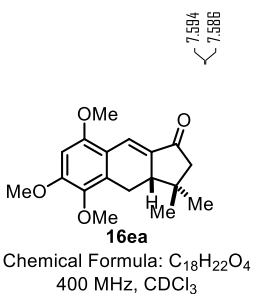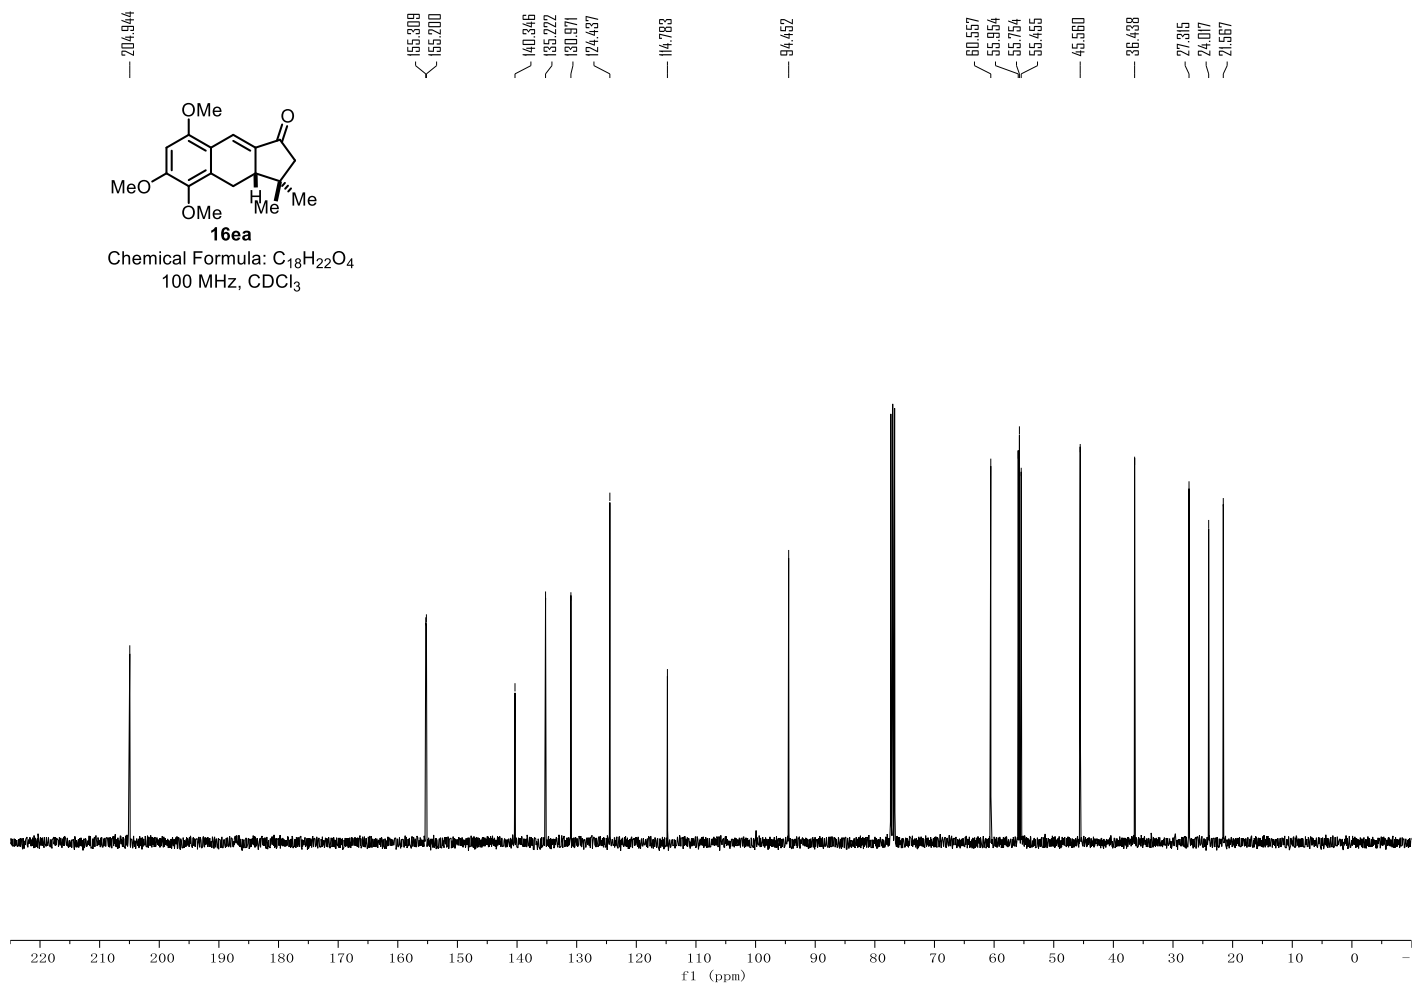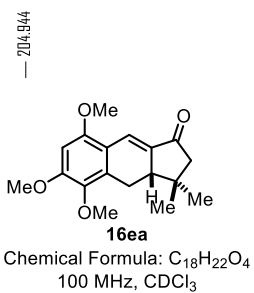

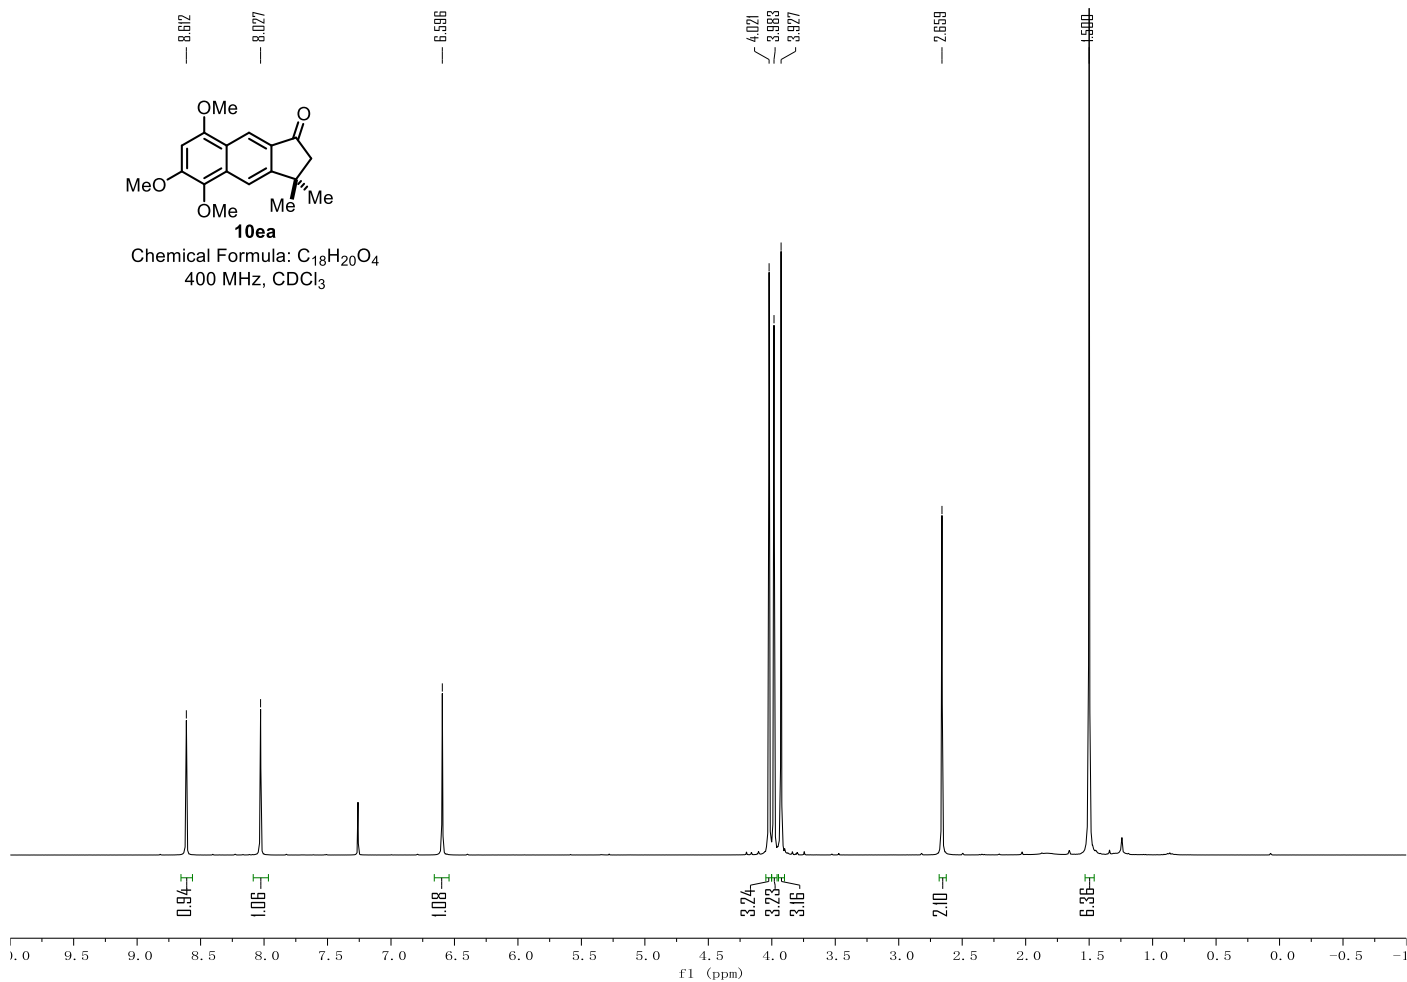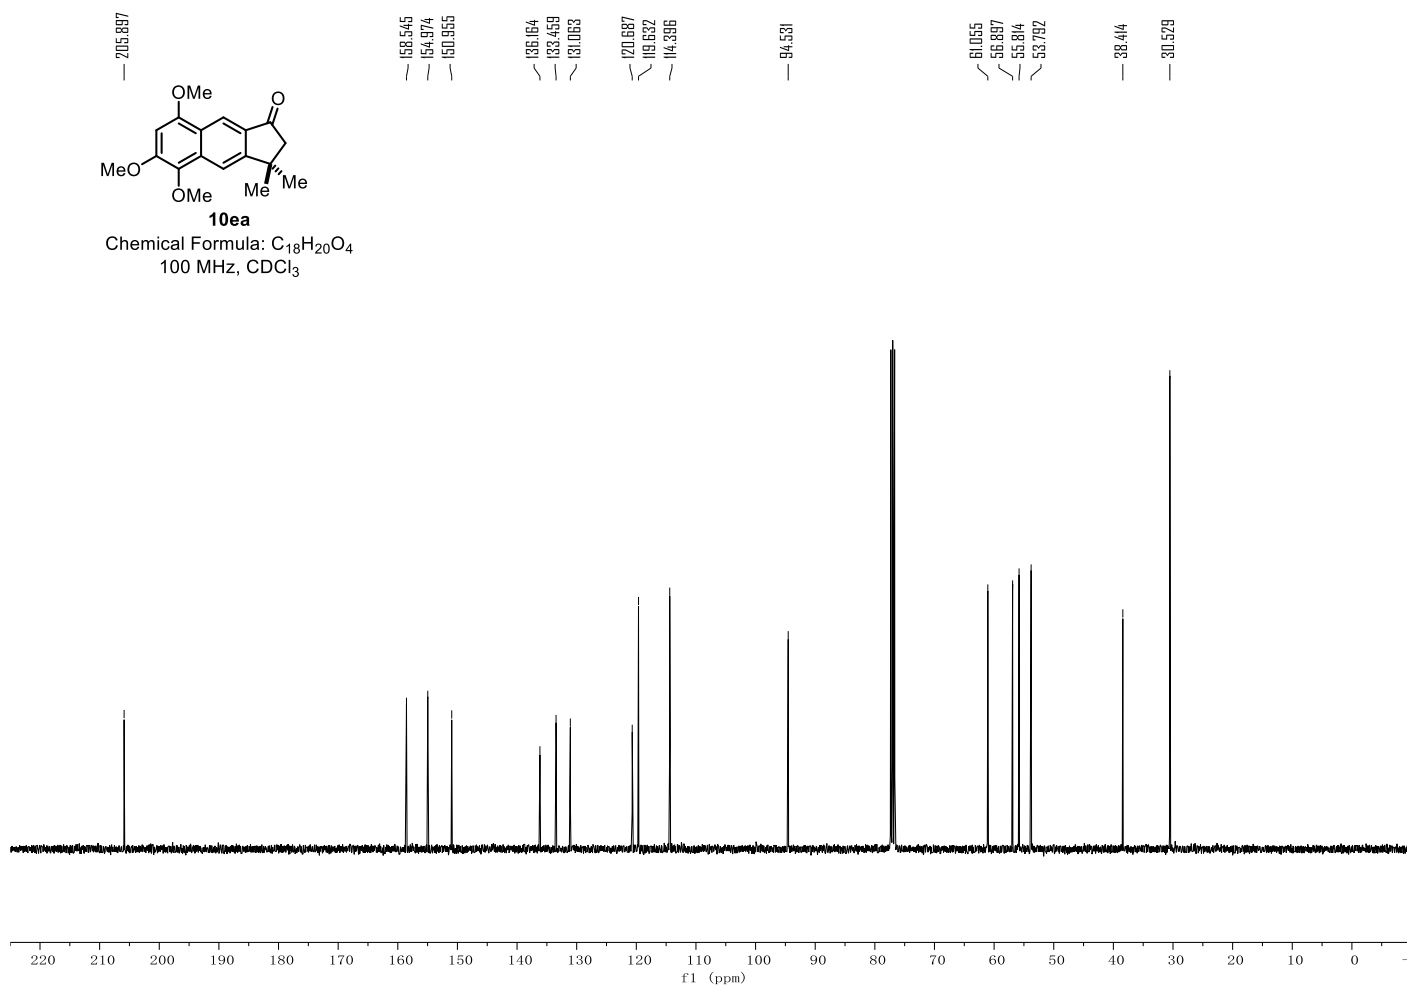



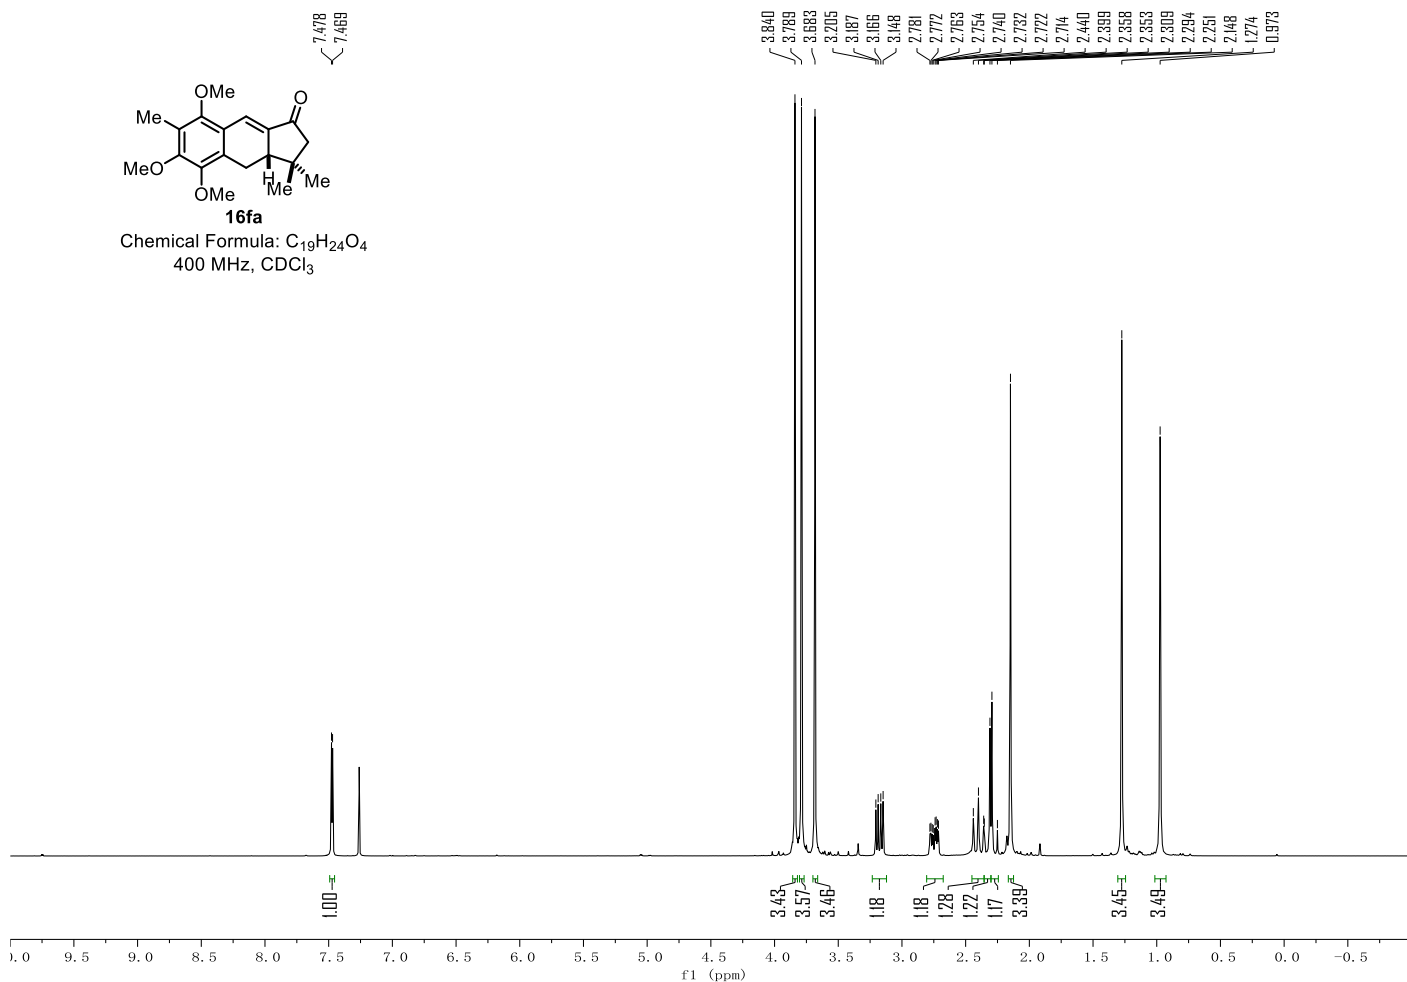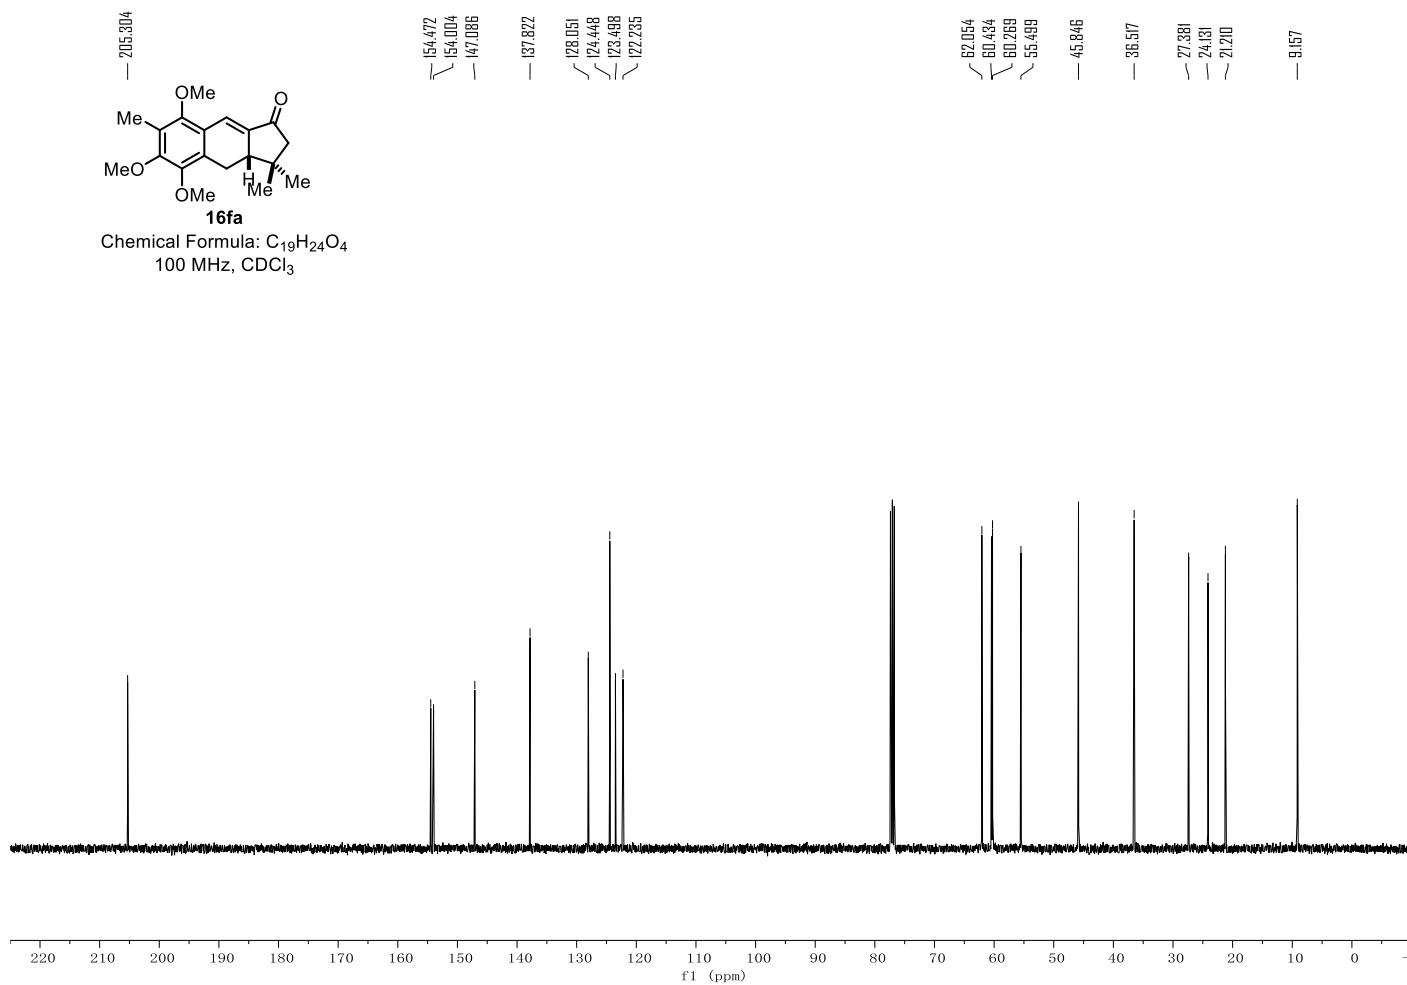

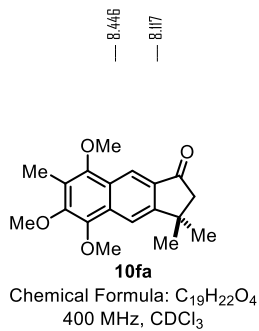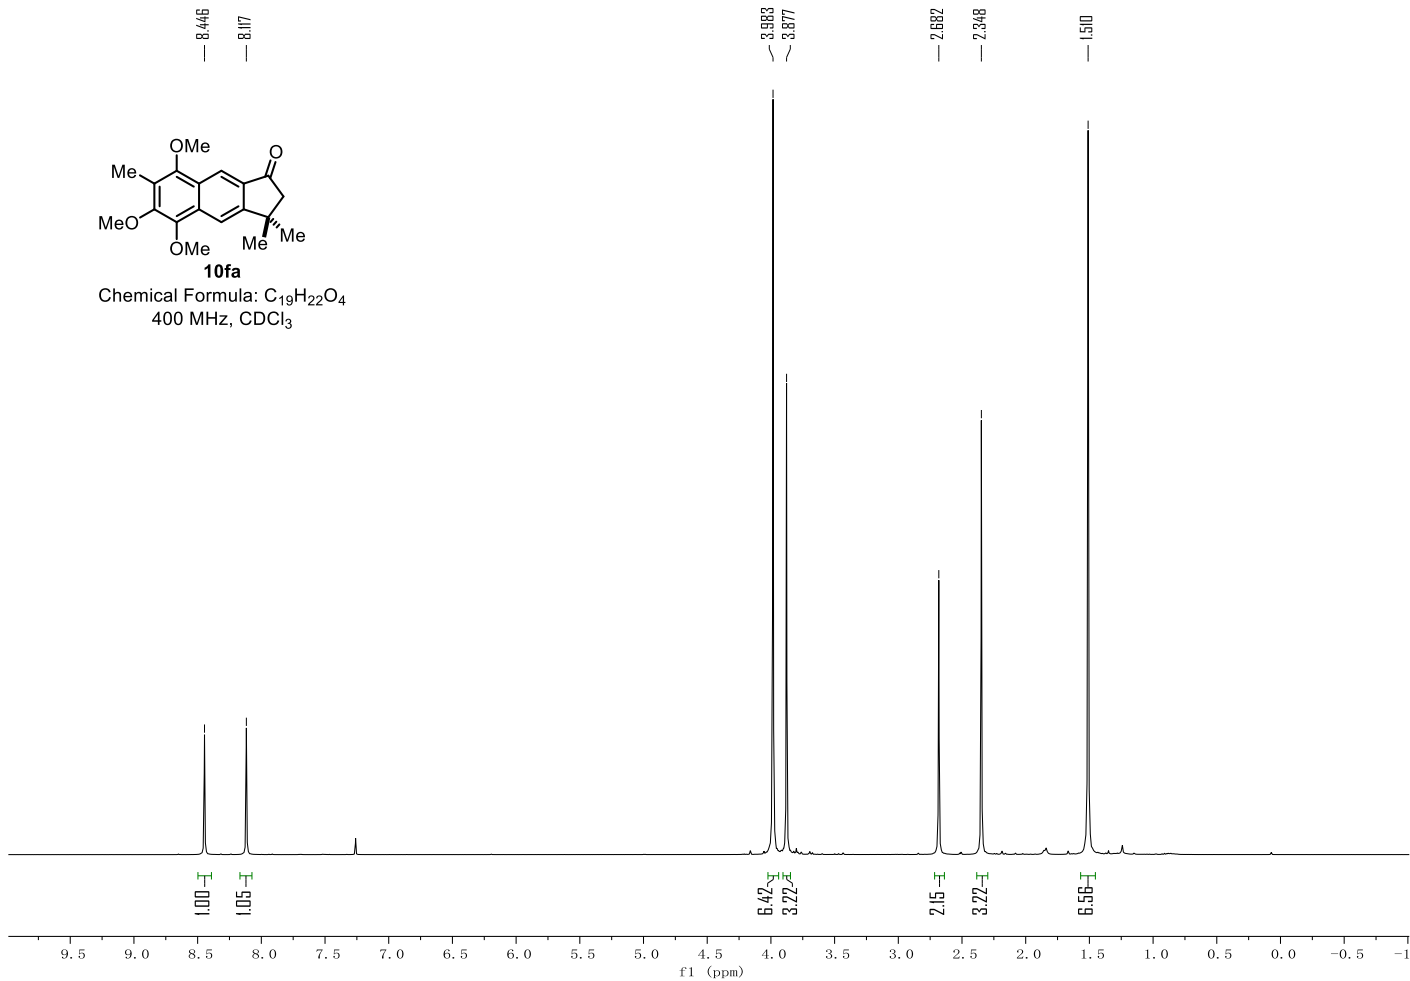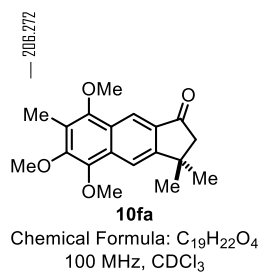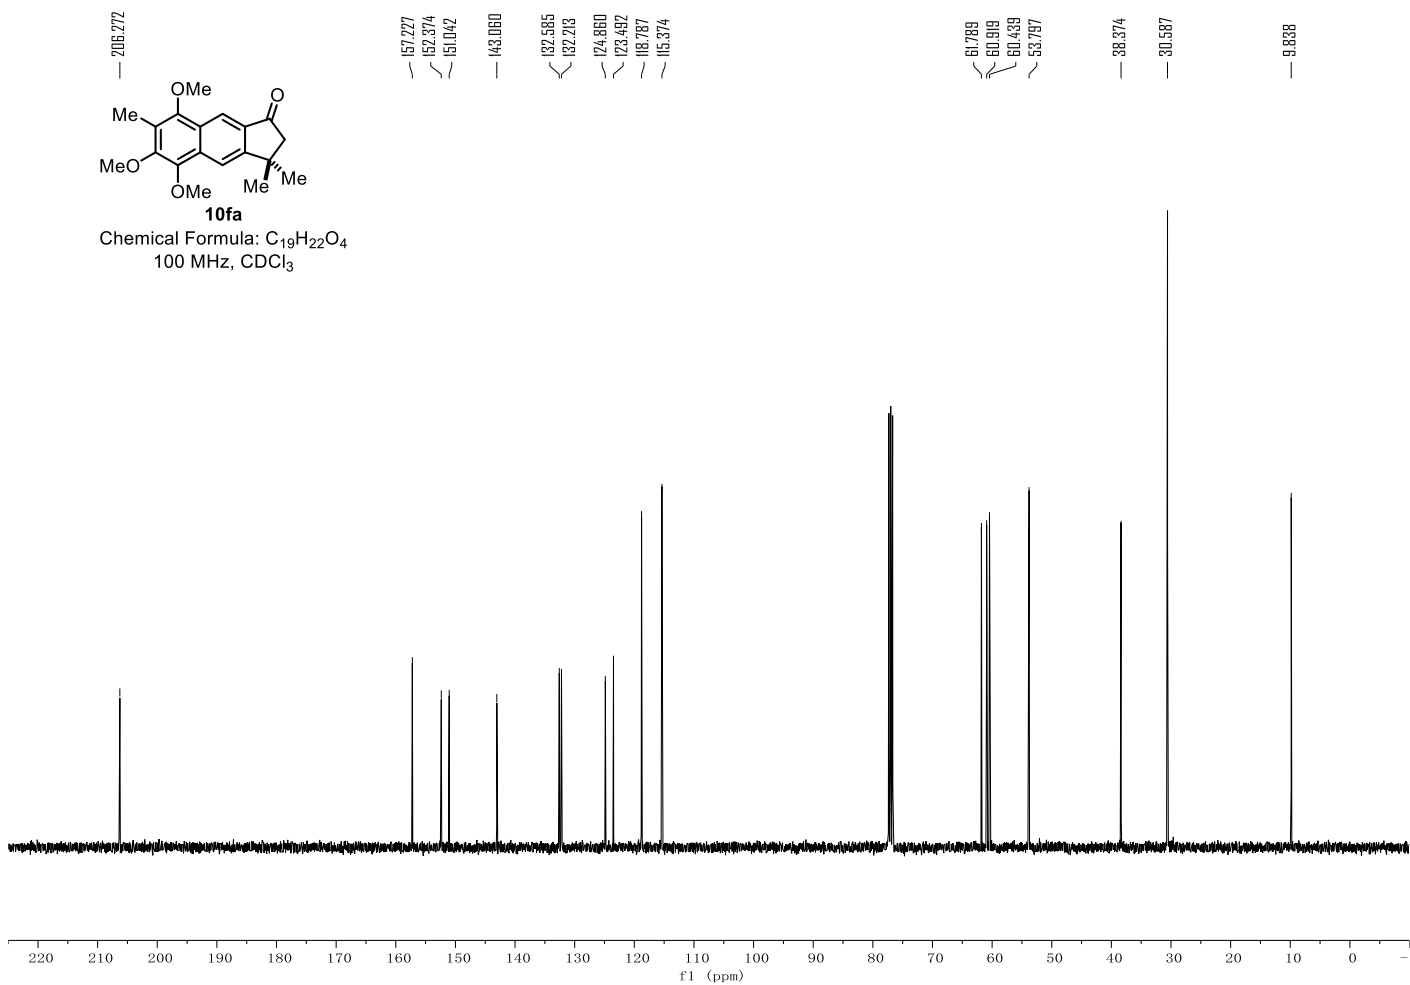

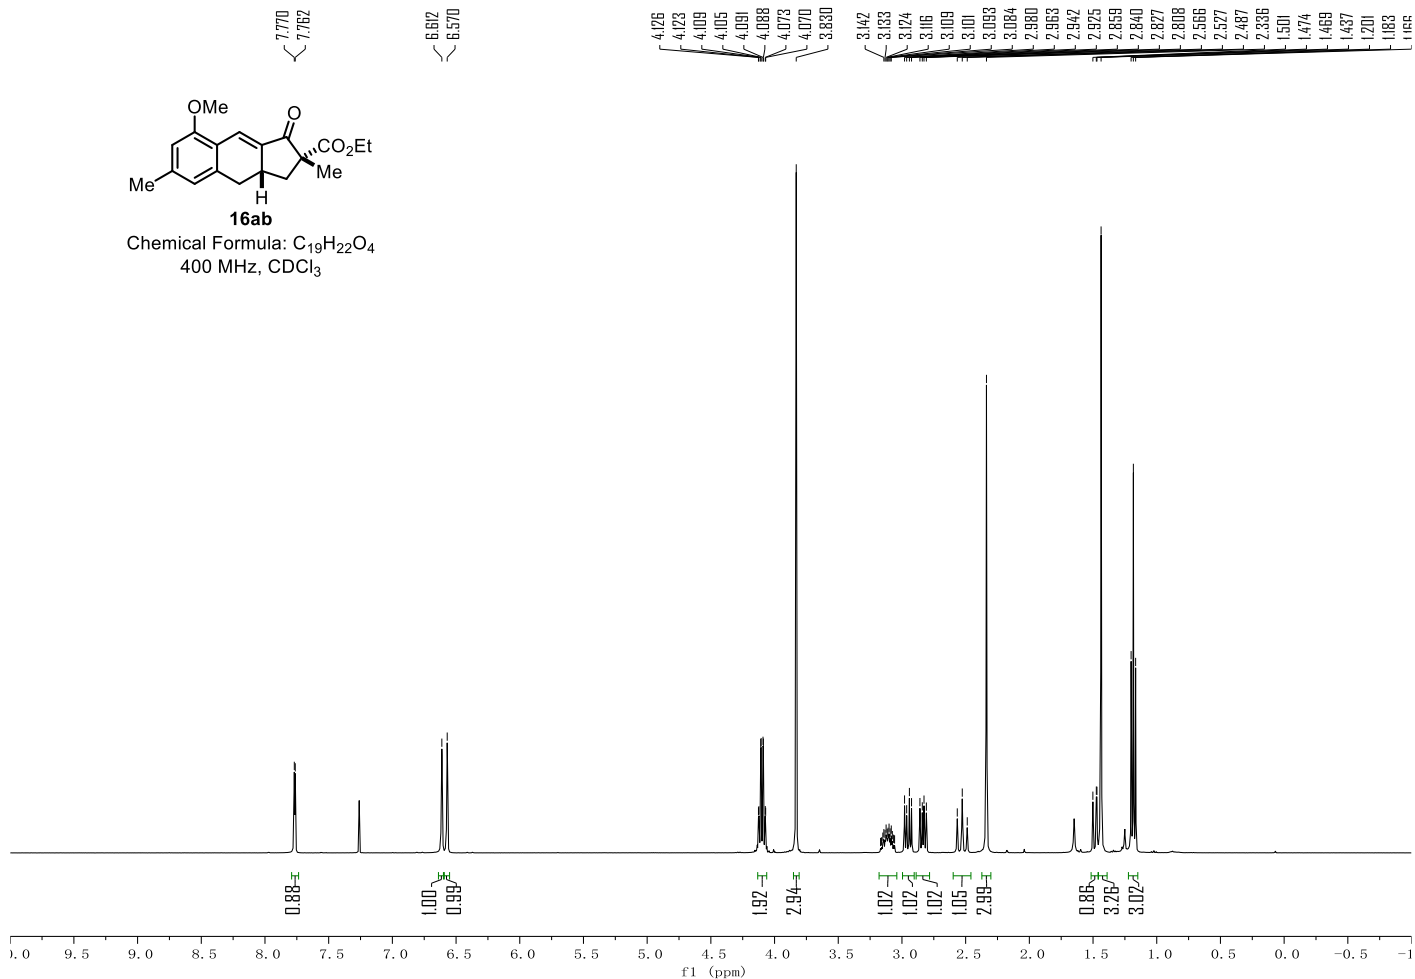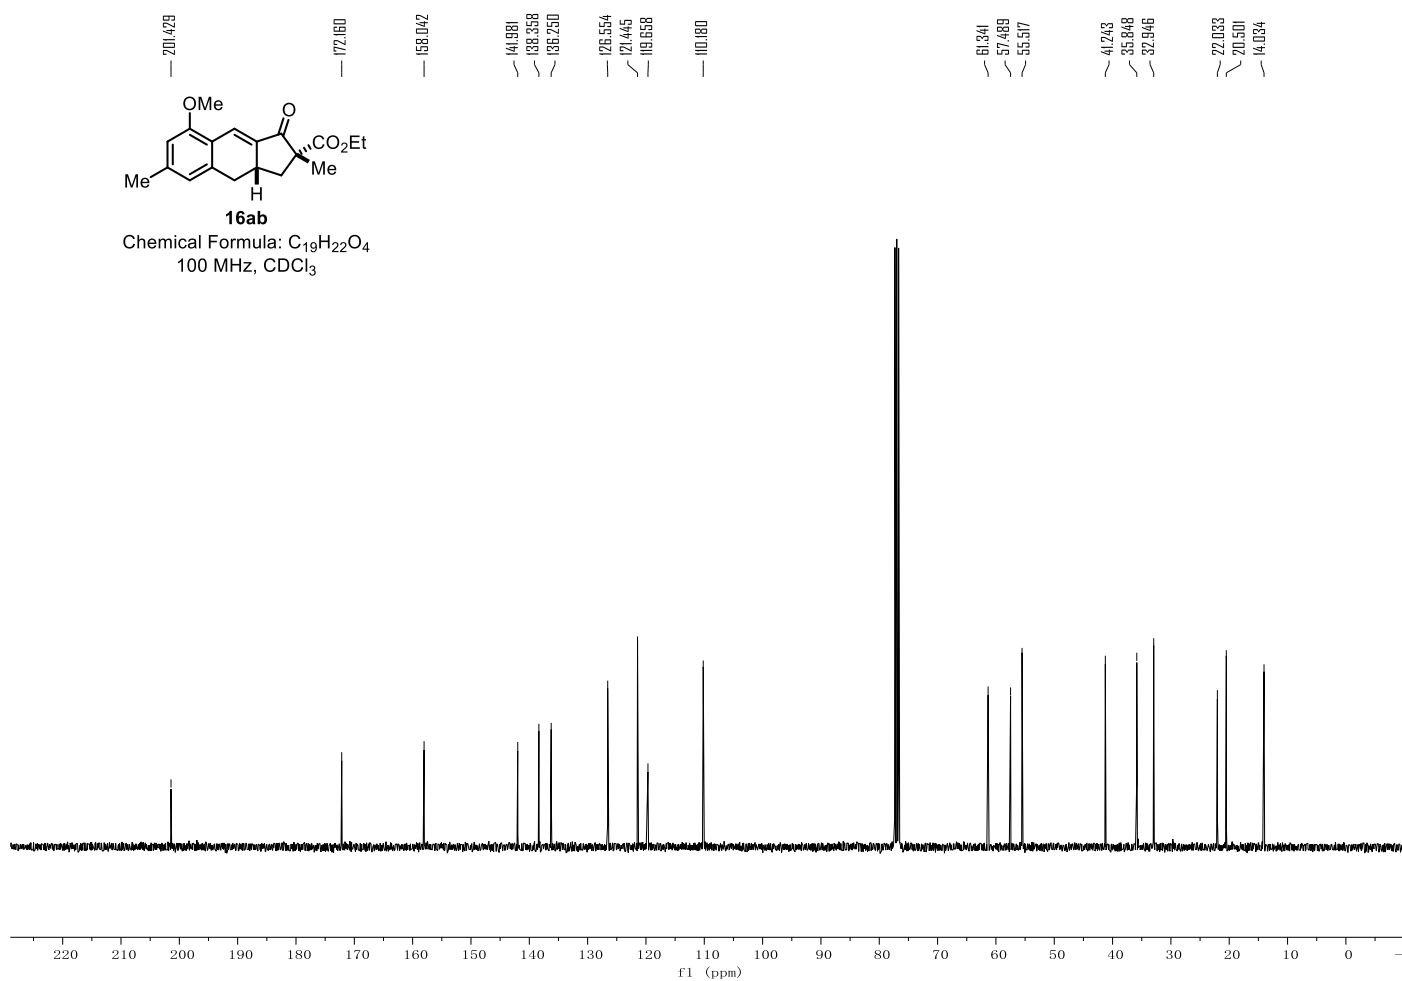

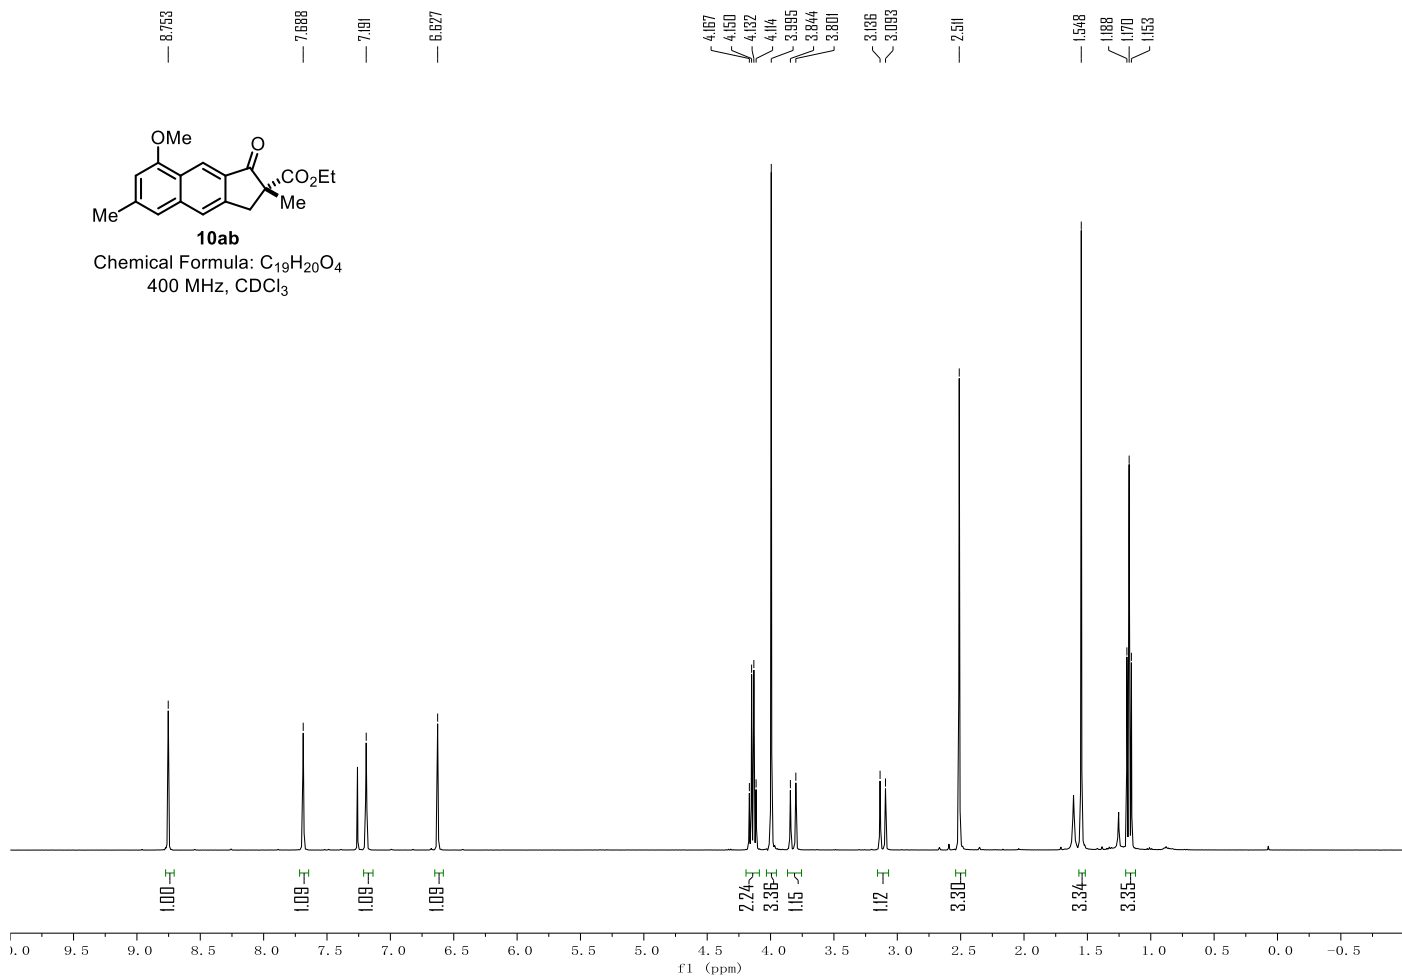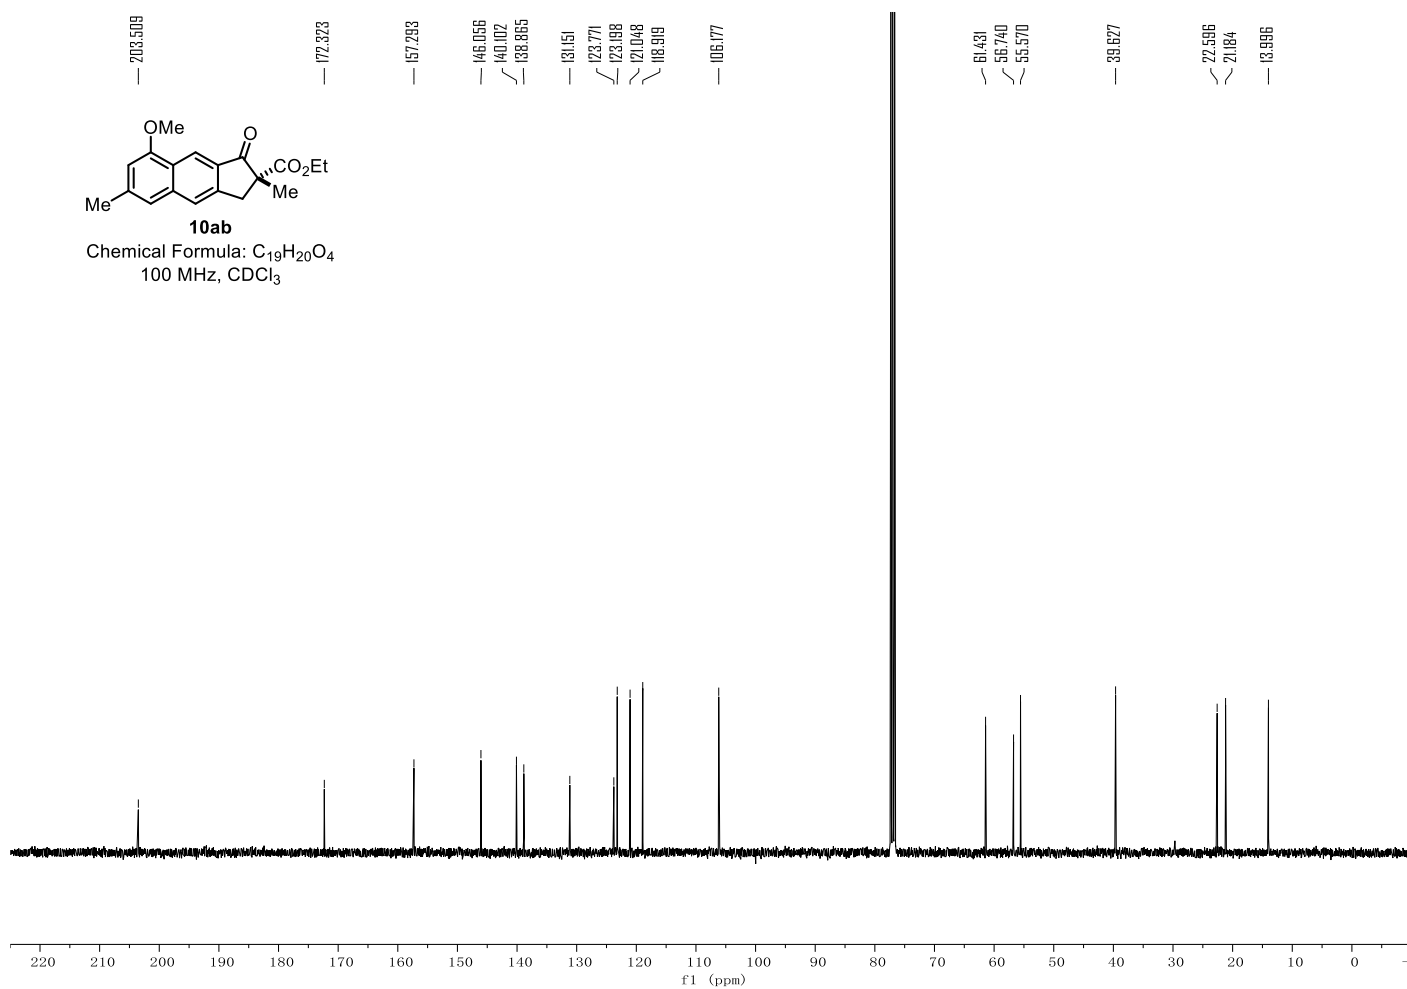

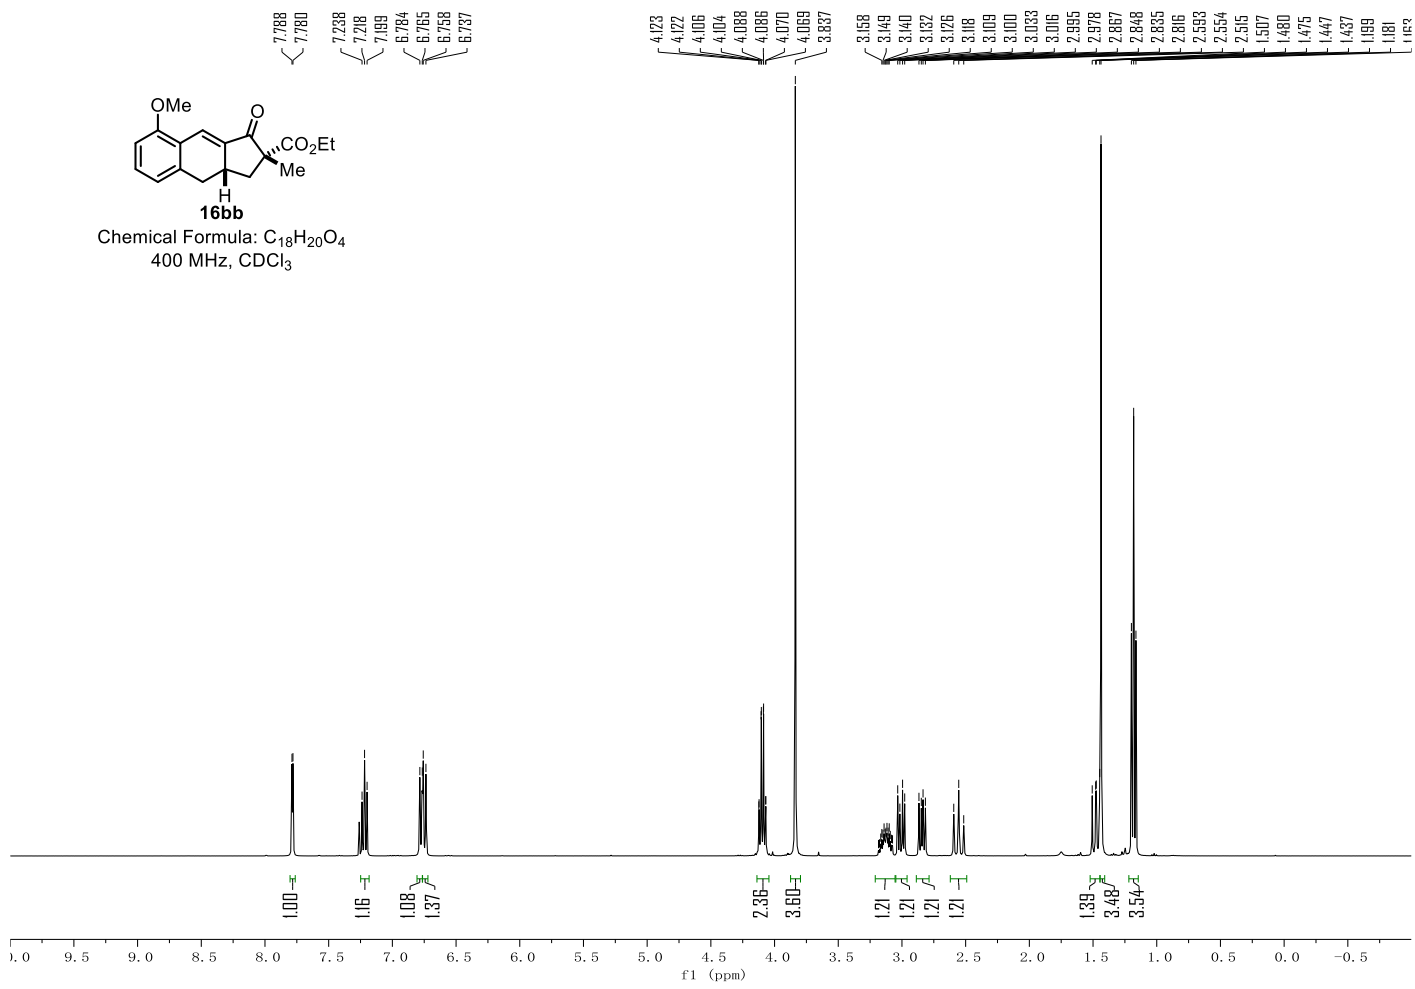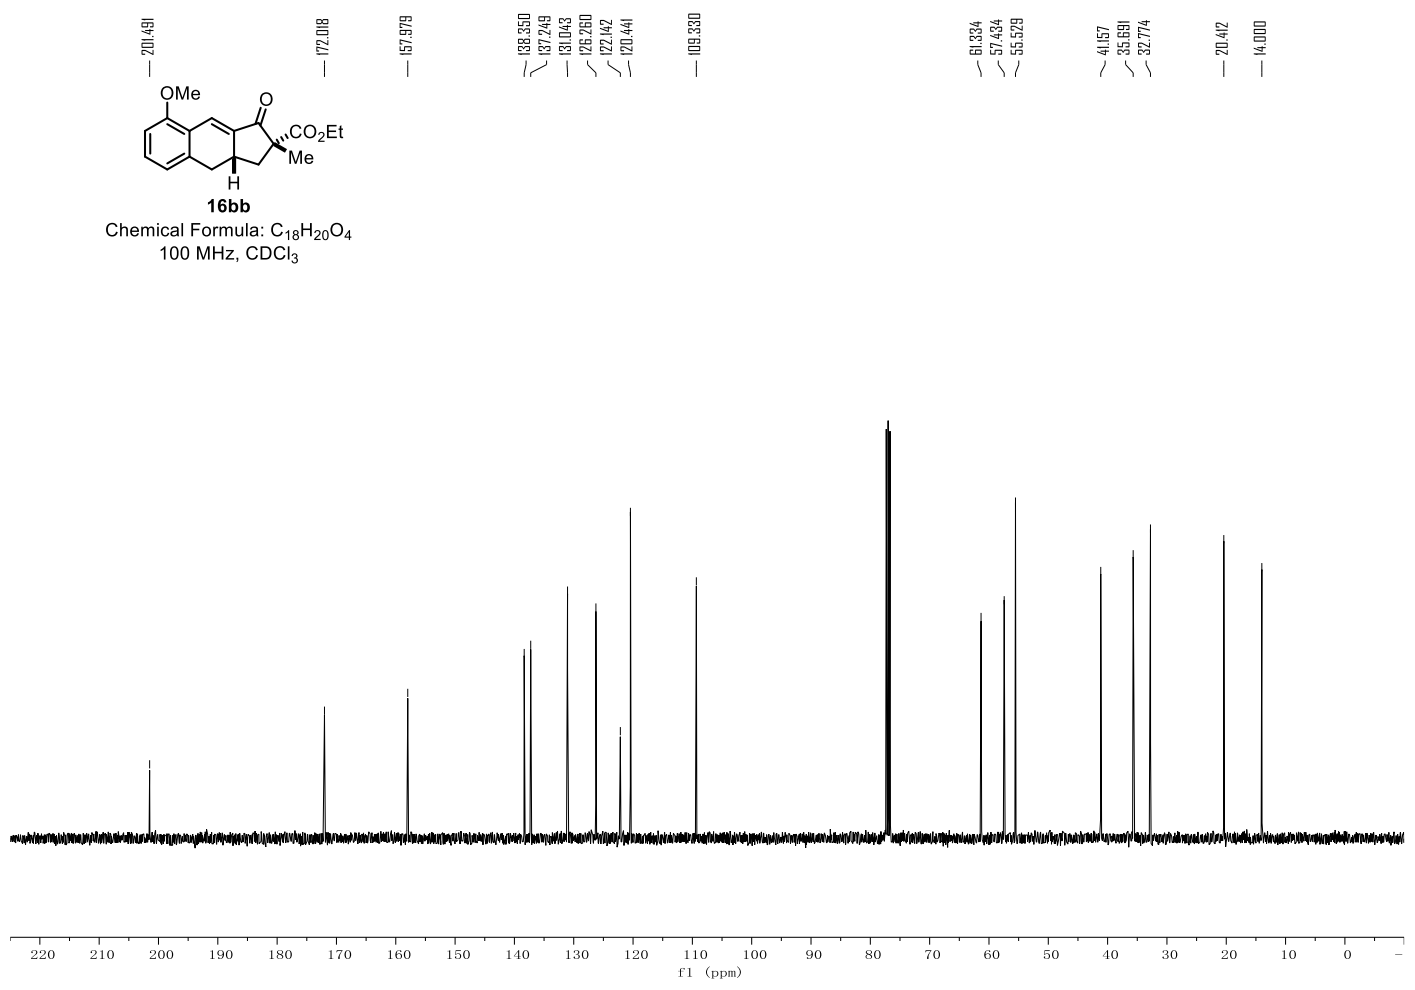

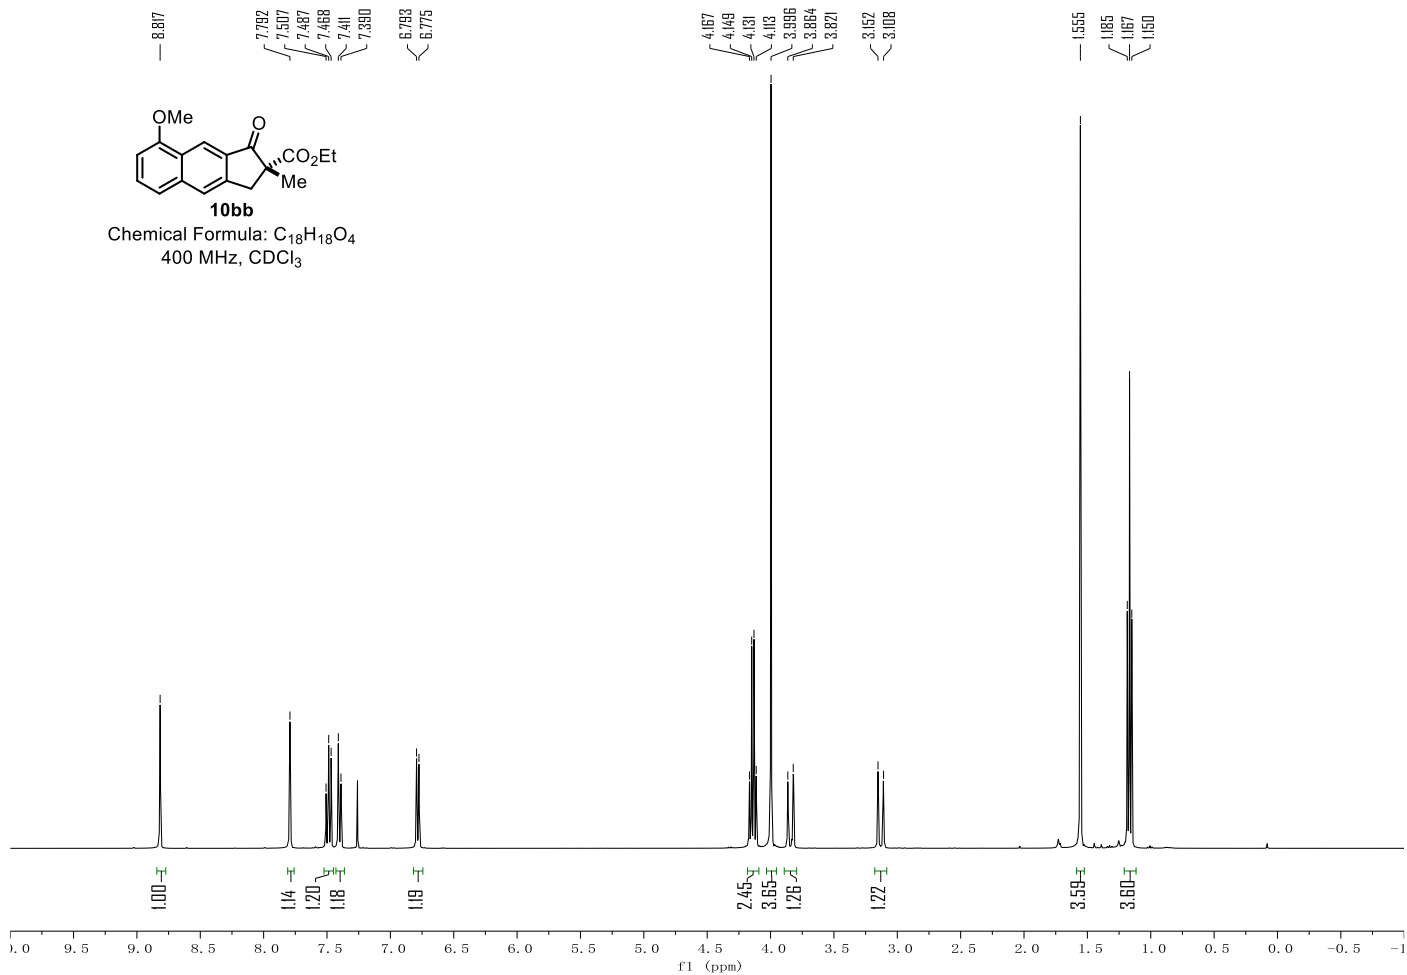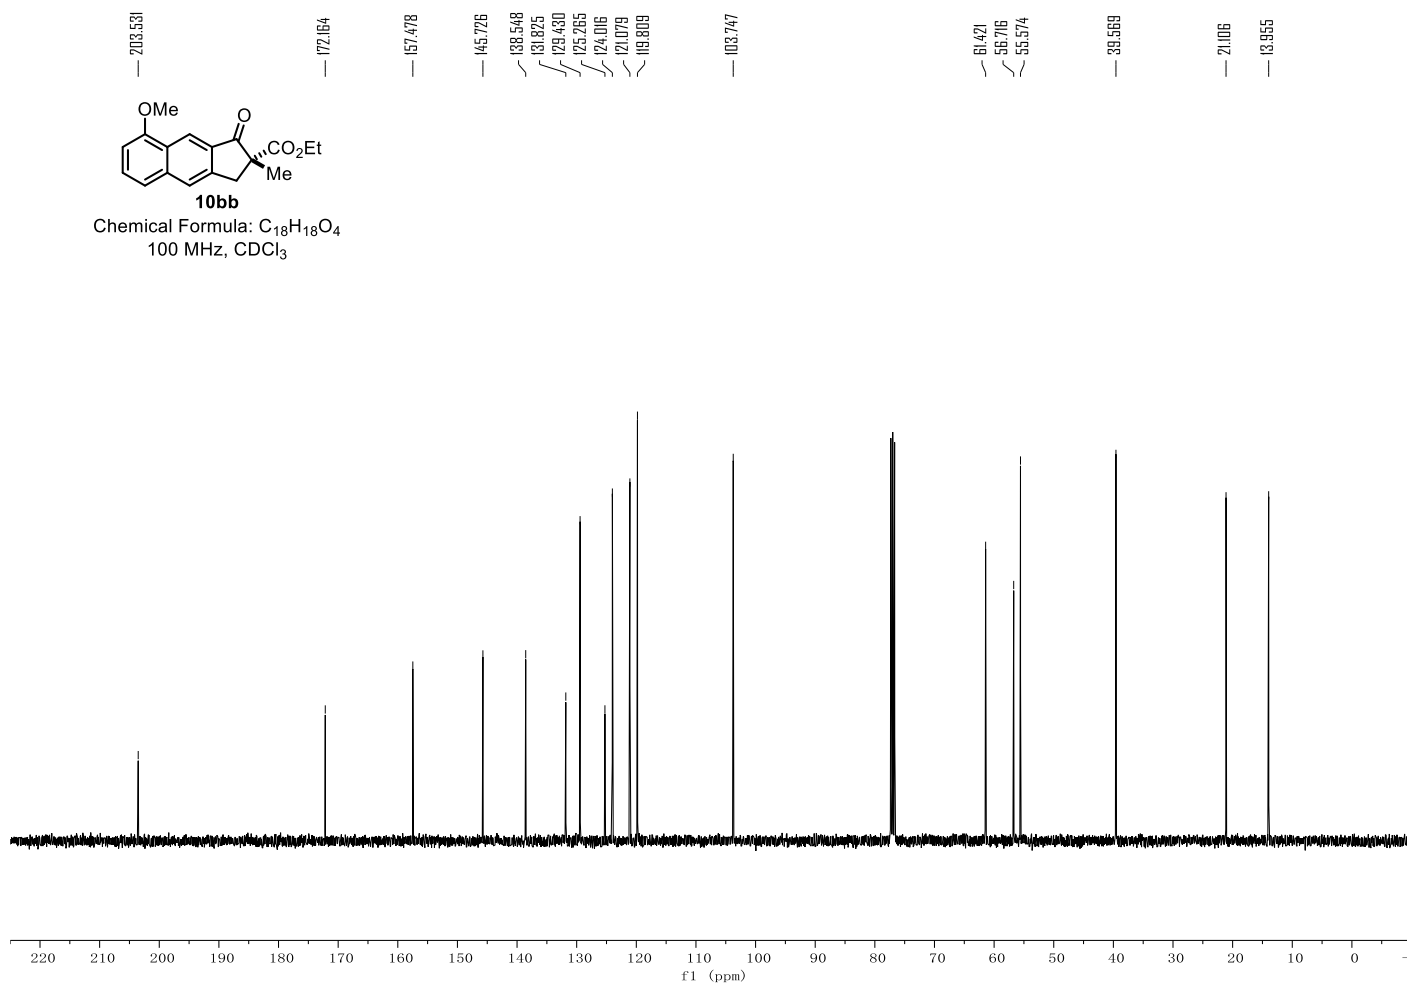

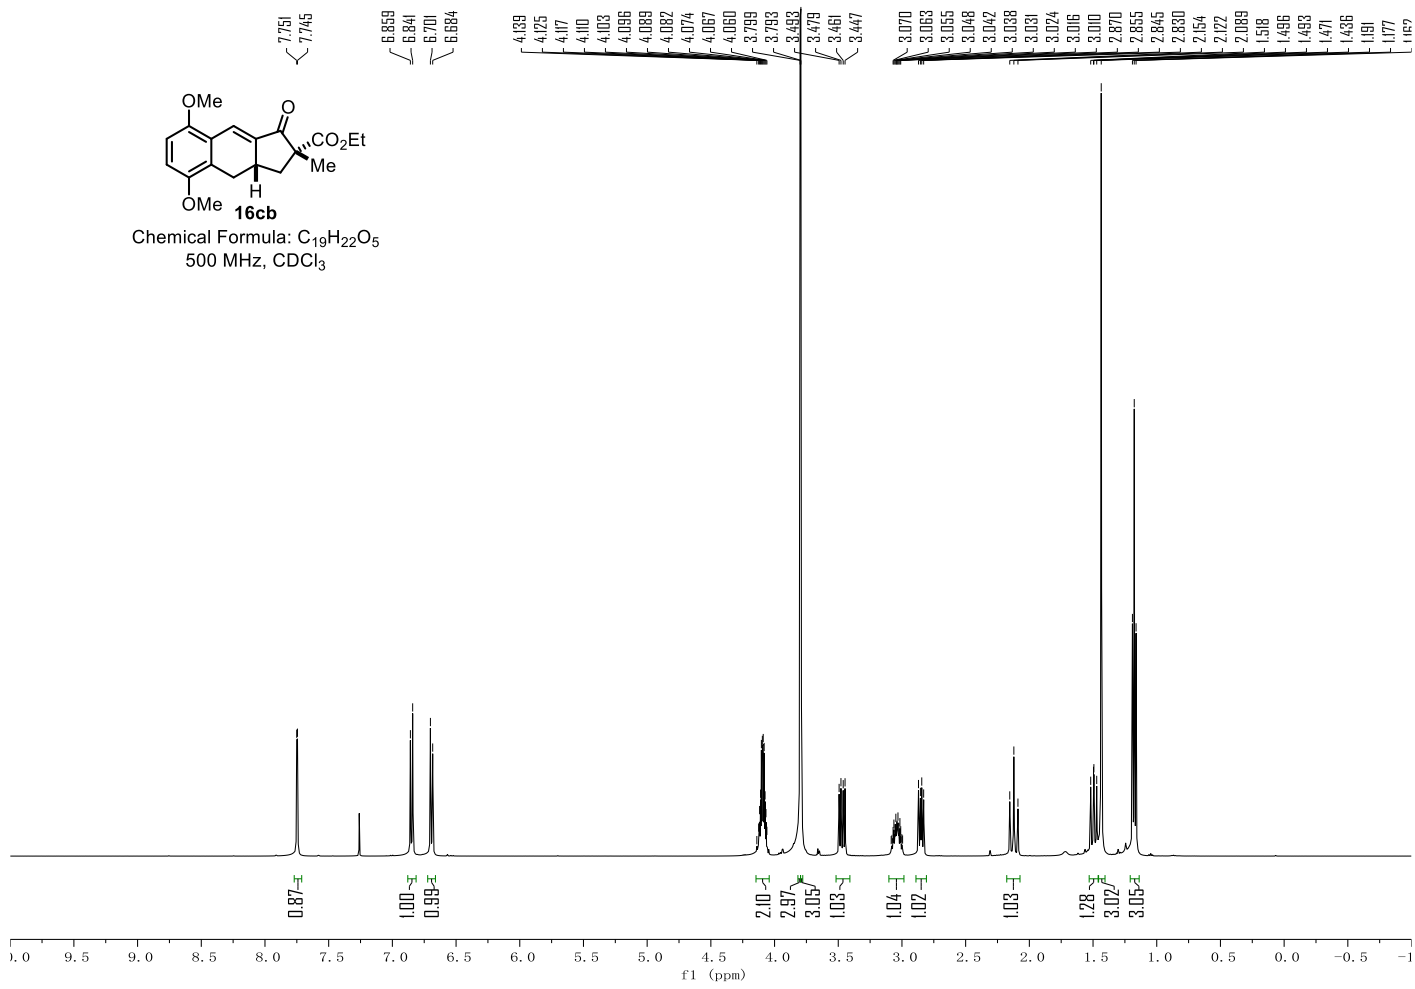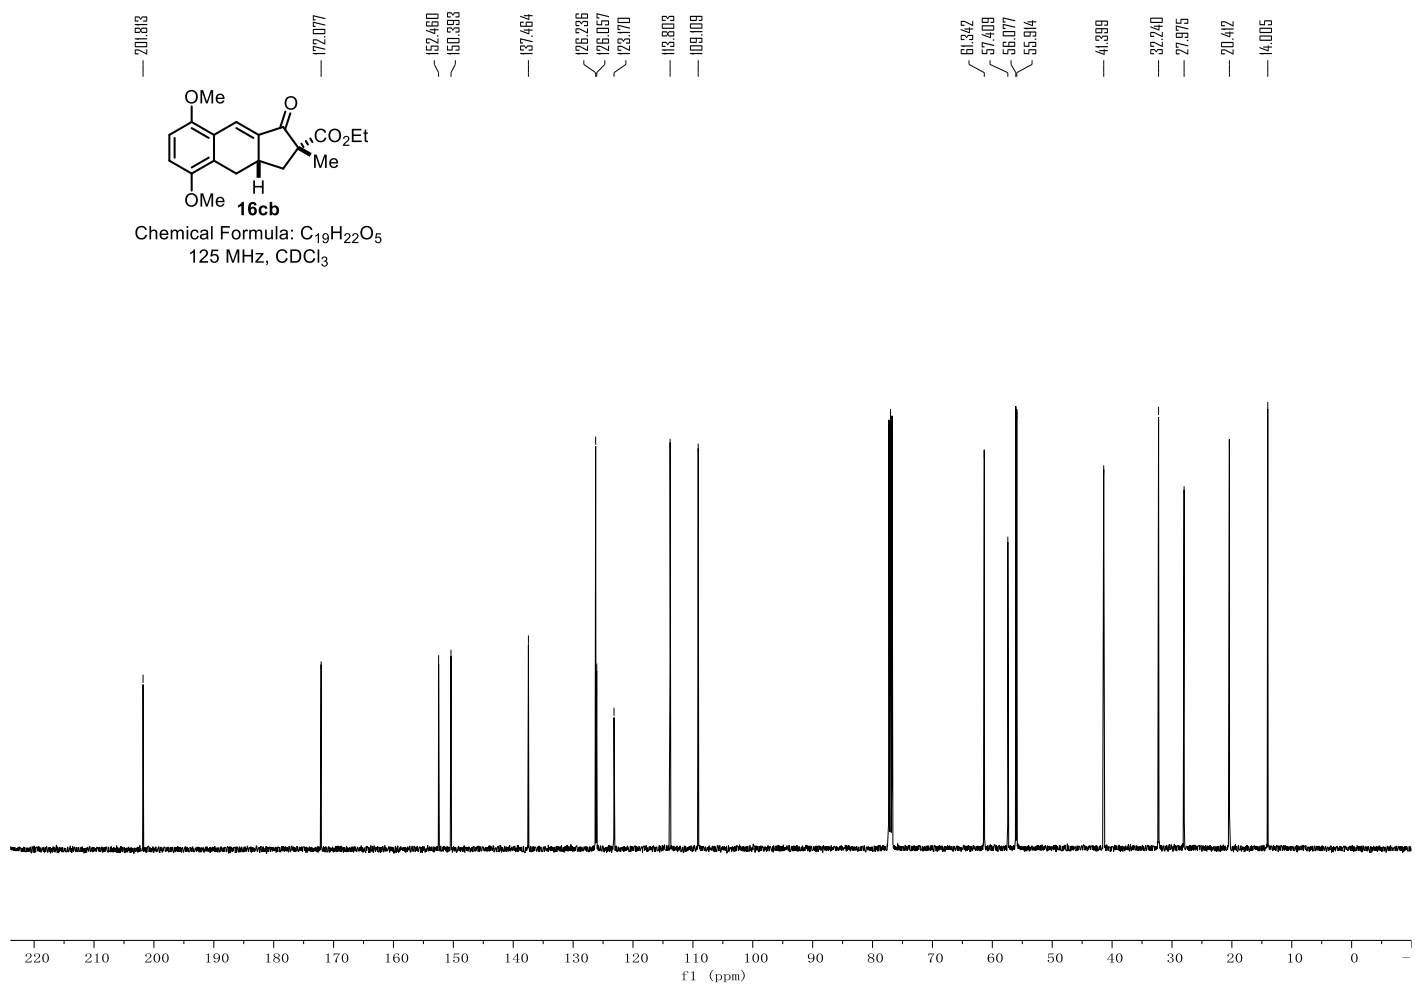

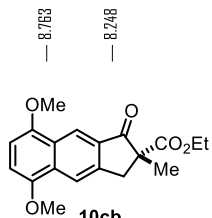

Chemical Formula: C<sub>19</sub>H<sub>20</sub>O<sub>5</sub>  
400 MHz, CDCl<sub>3</sub>

6.824  
6.803  
6.692  
6.661

4.161  
4.143  
4.125  
4.107  
3.971  
3.956  
3.872  
3.829  
3.171  
3.128

1.552  
1.178  
1.160  
1.142

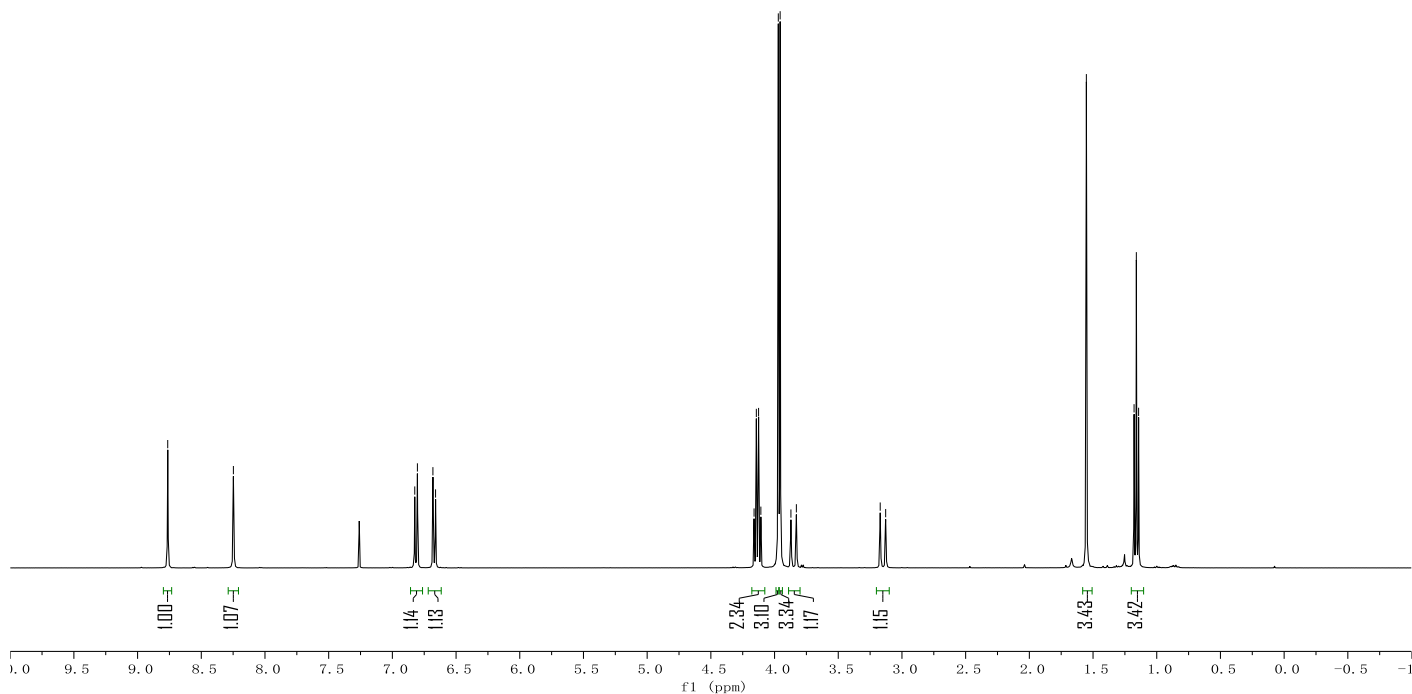

203.765

172.206

151.335  
148.960  
145.498

132.282  
130.479  
128.022  
121.699  
118.831

106.504  
103.059

61.423  
56.767  
55.864  
55.752

39.873

21.098

13.969

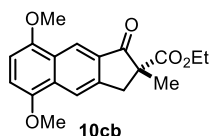

Chemical Formula: C<sub>19</sub>H<sub>20</sub>O<sub>5</sub>  
100 MHz, CDCl<sub>3</sub>

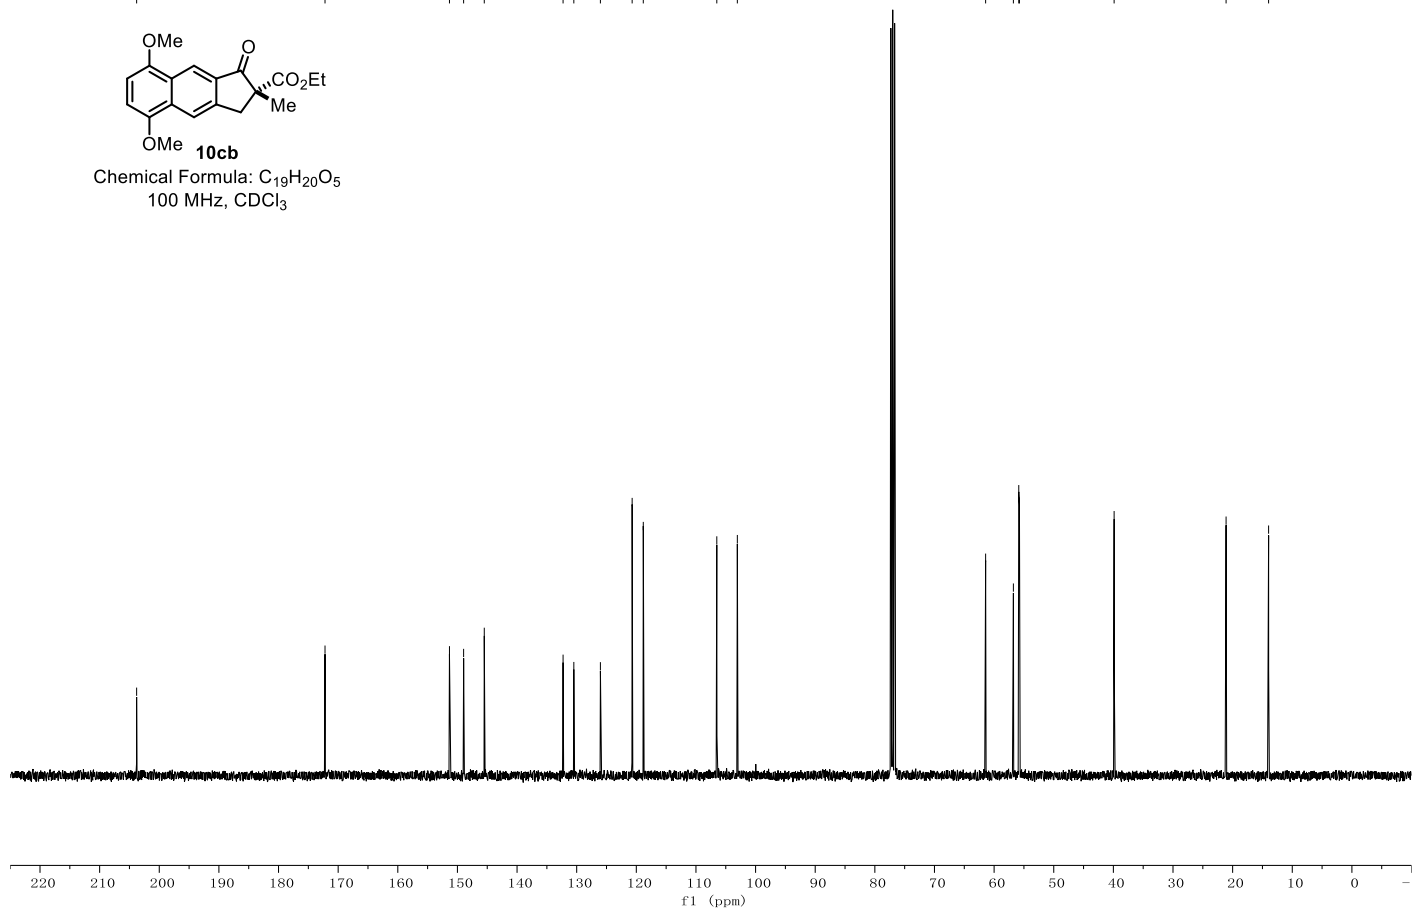



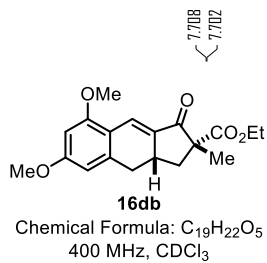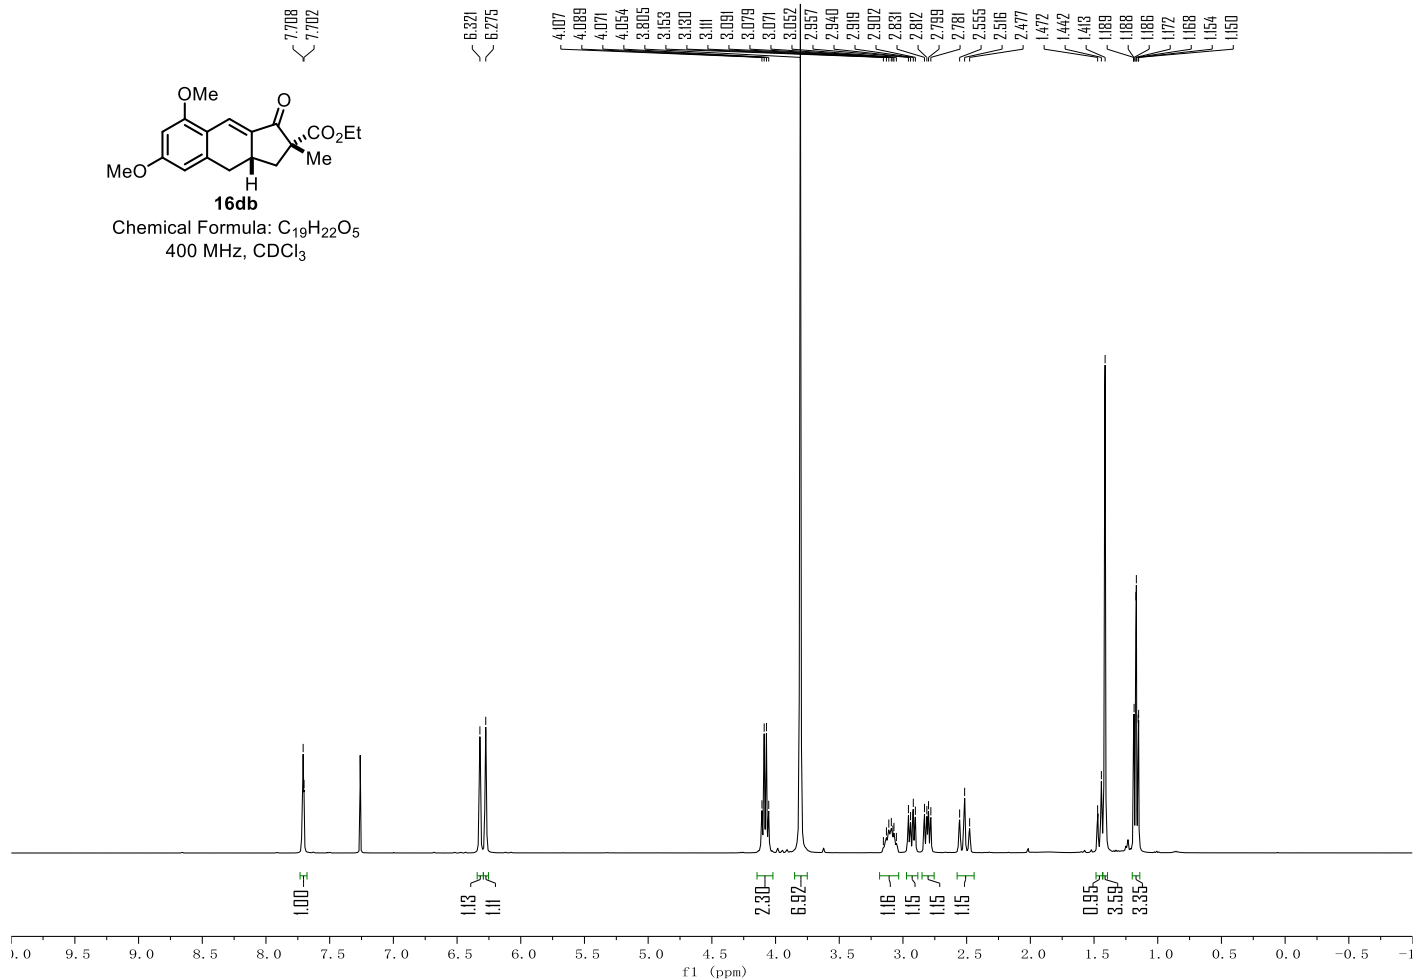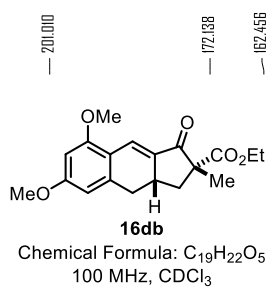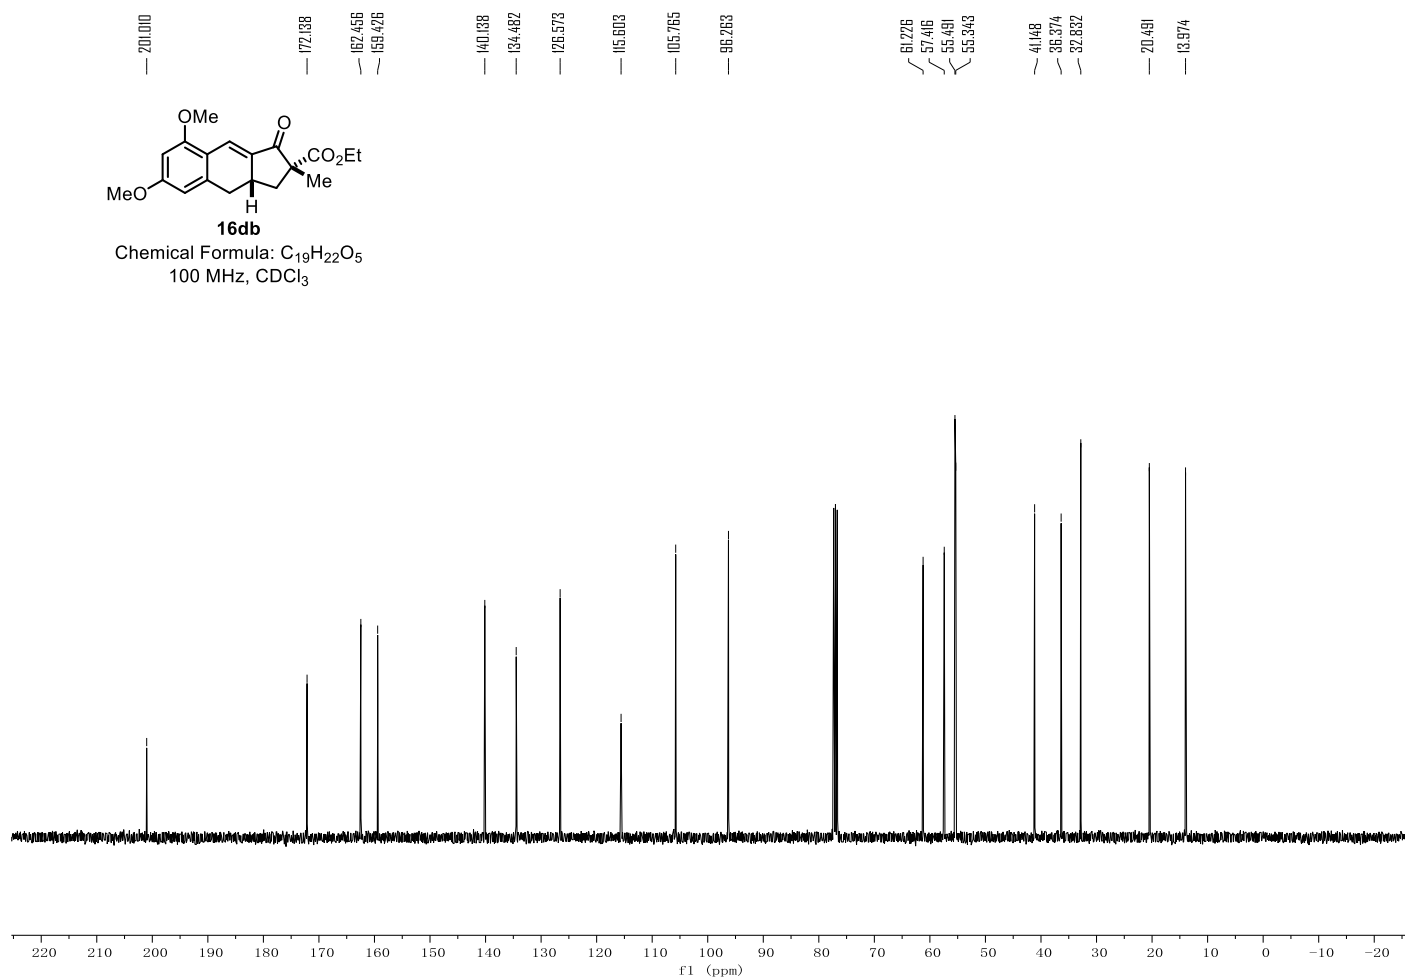

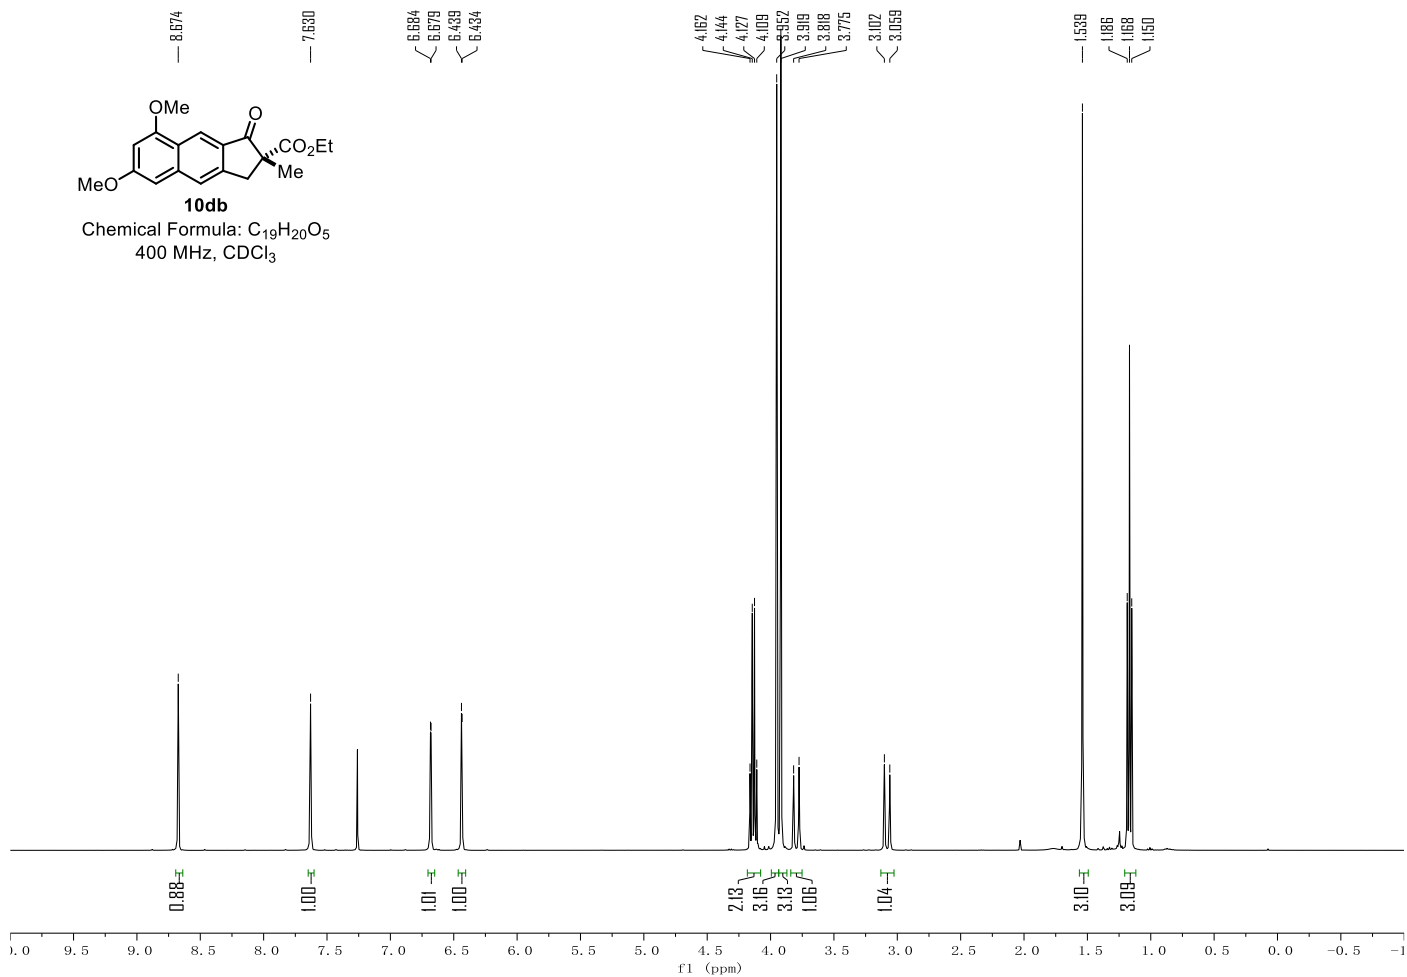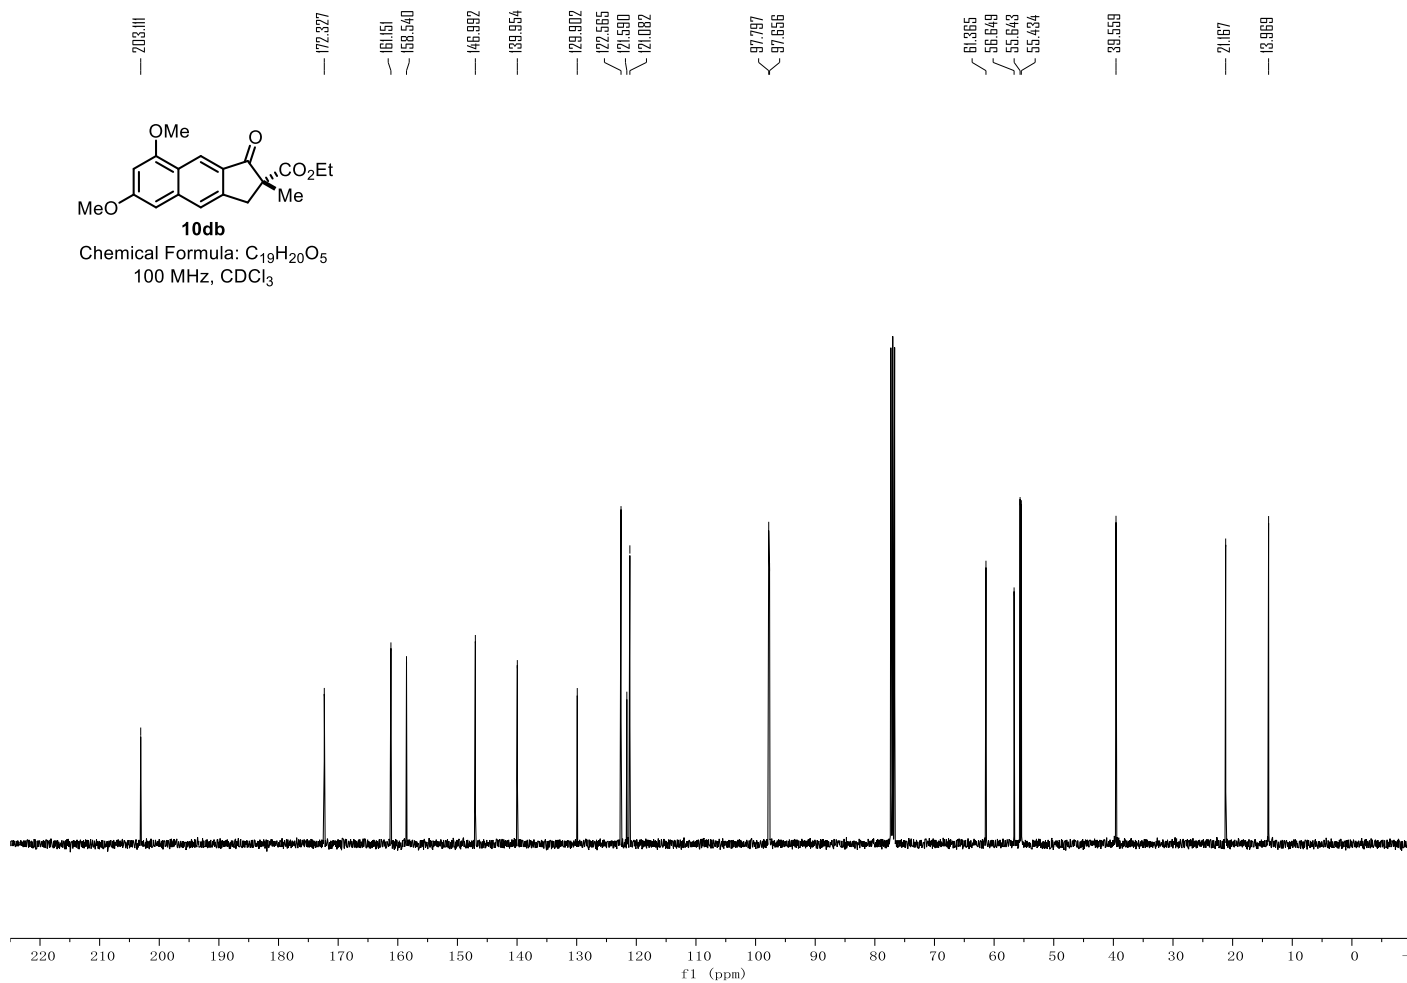

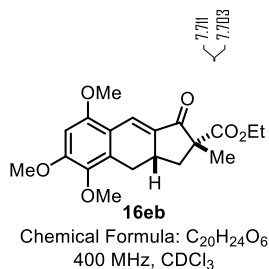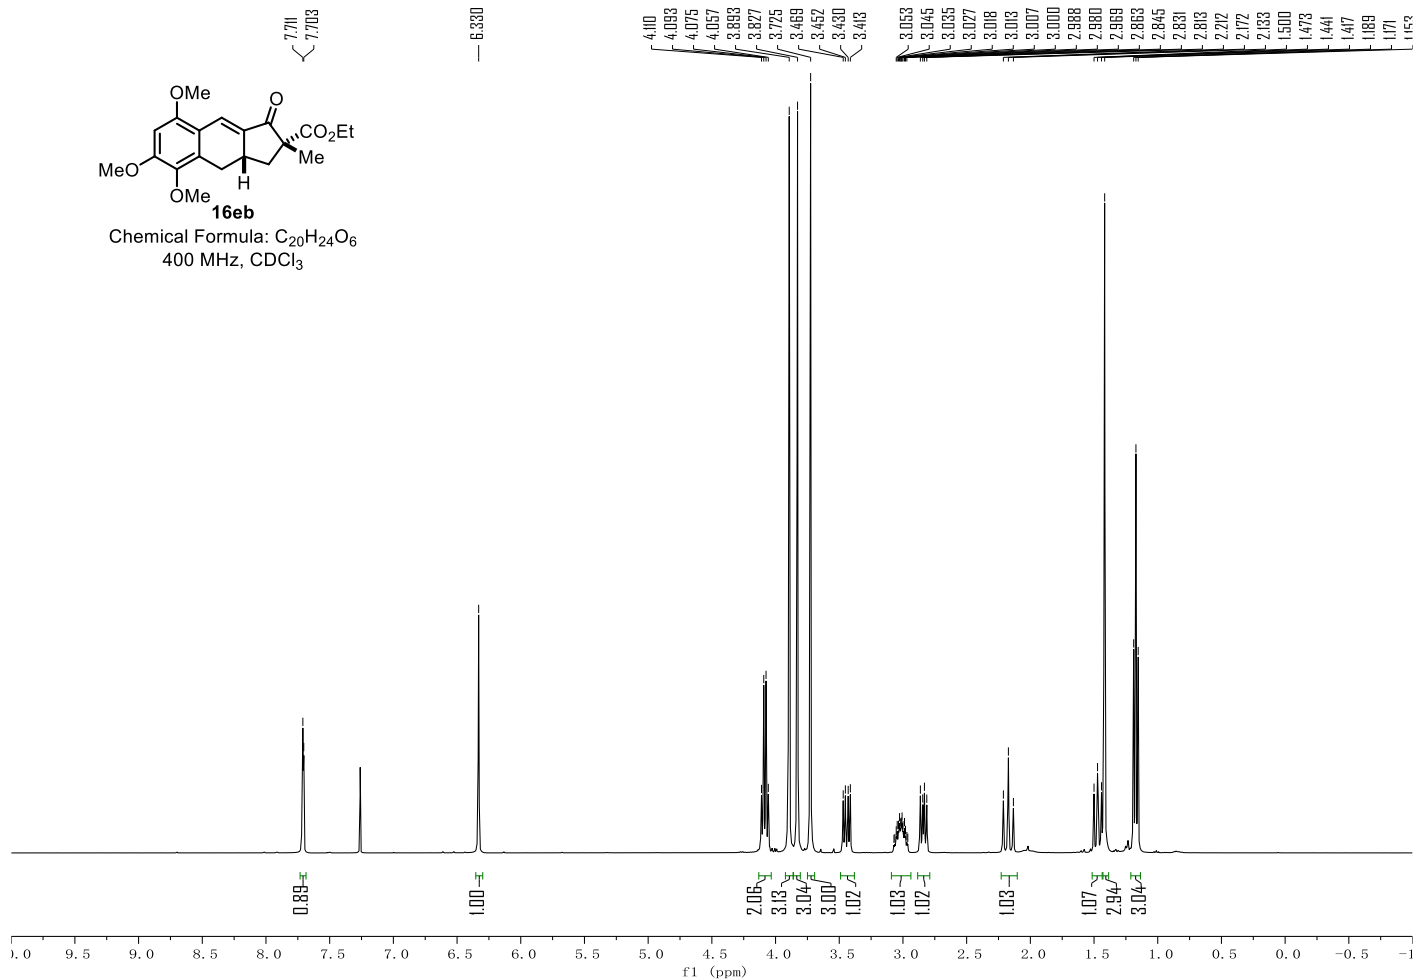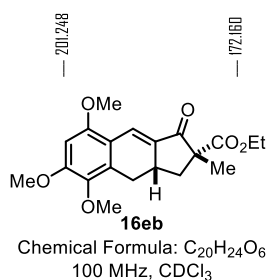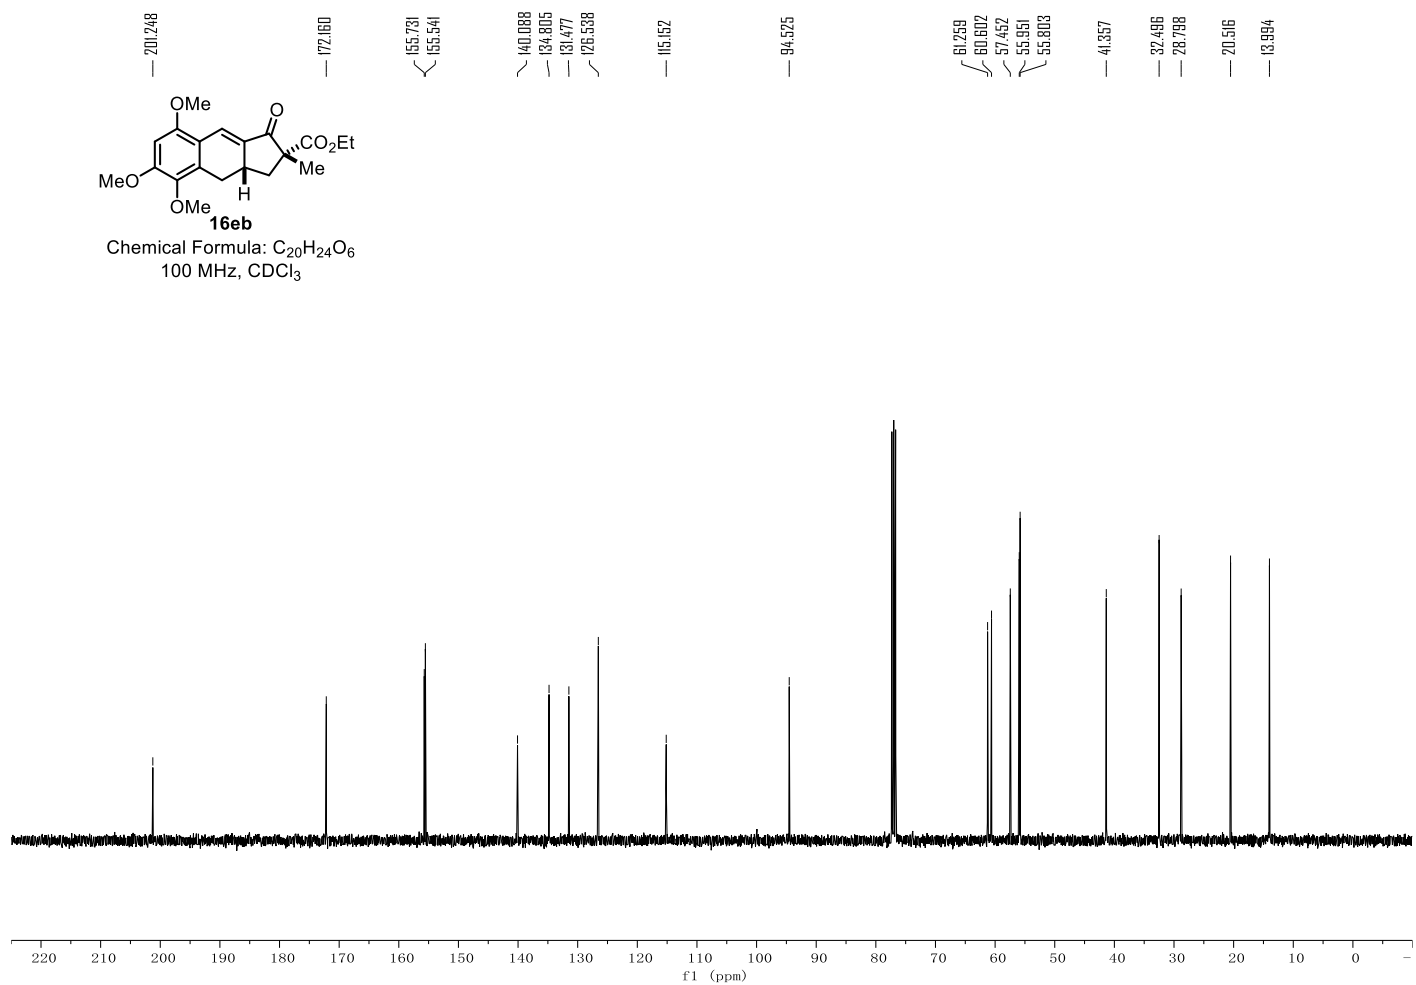

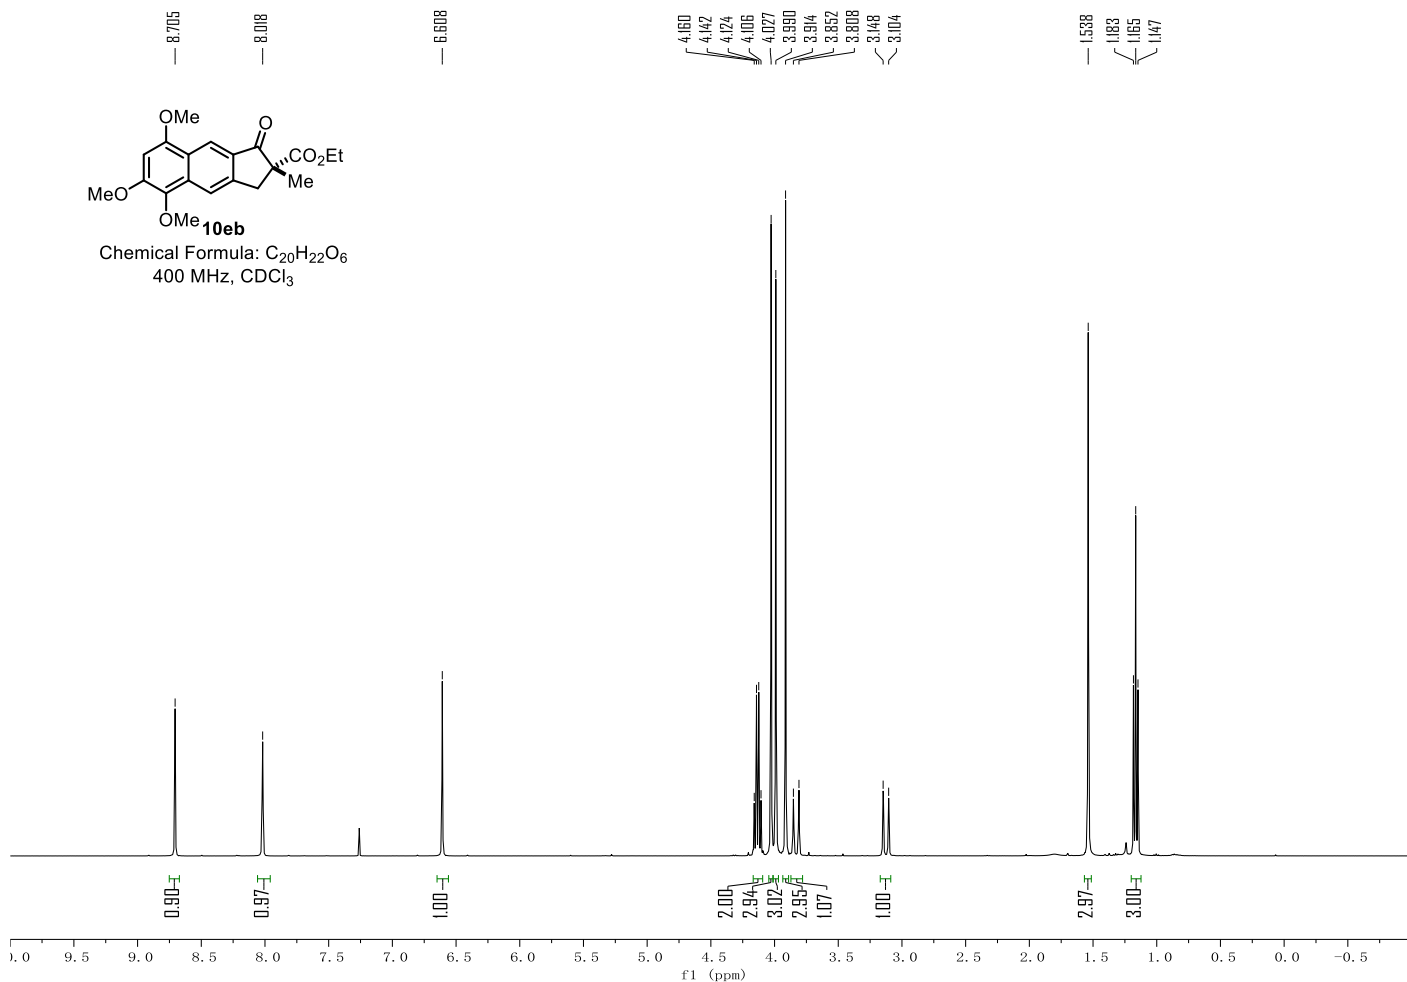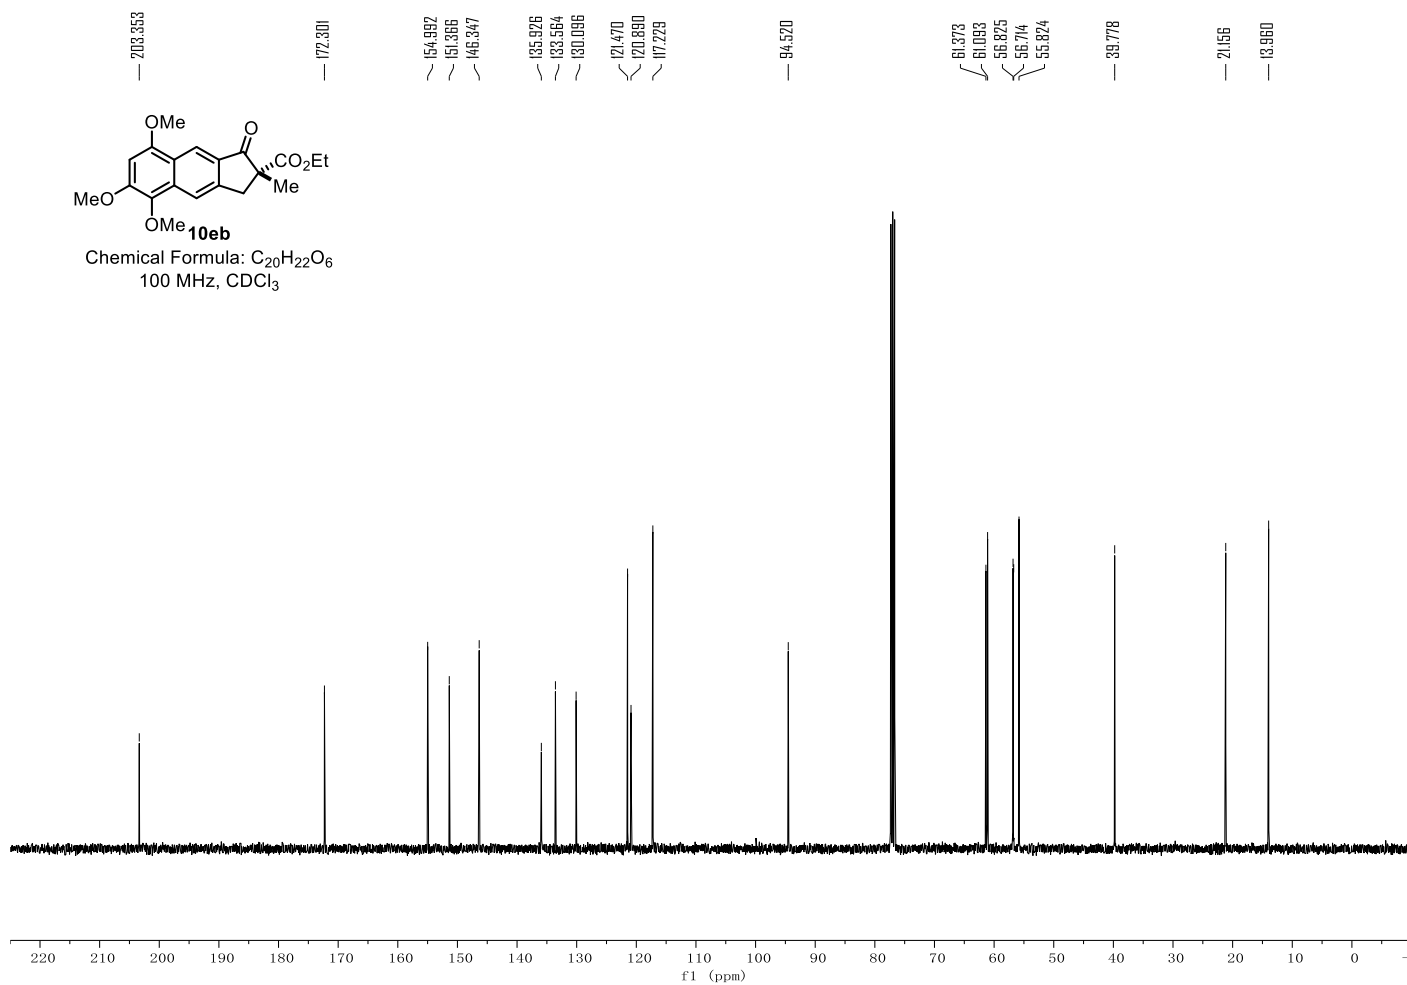

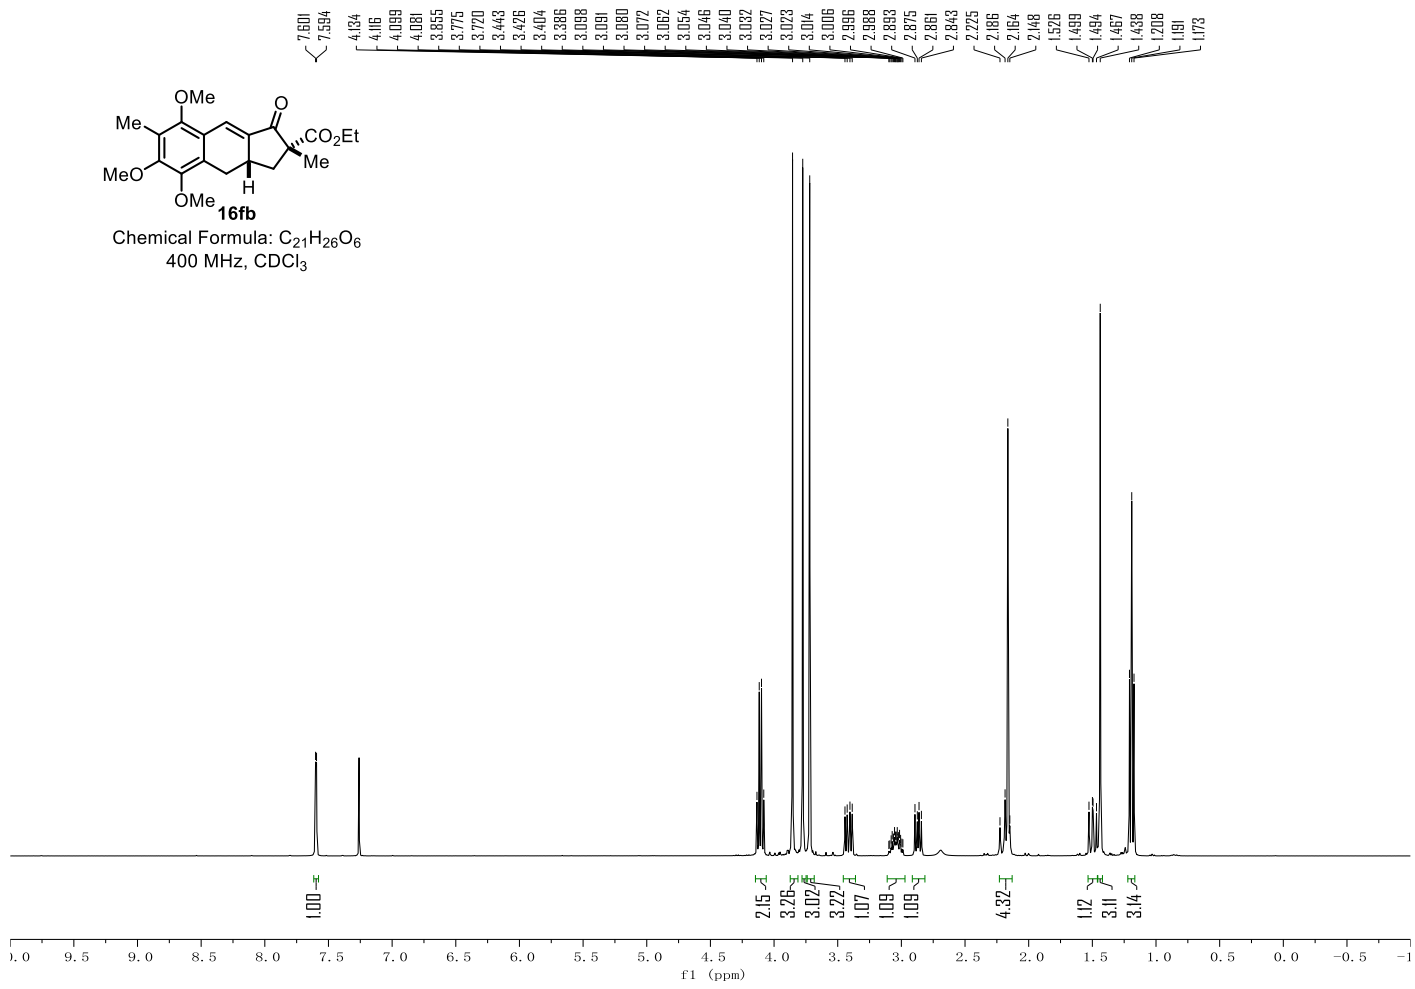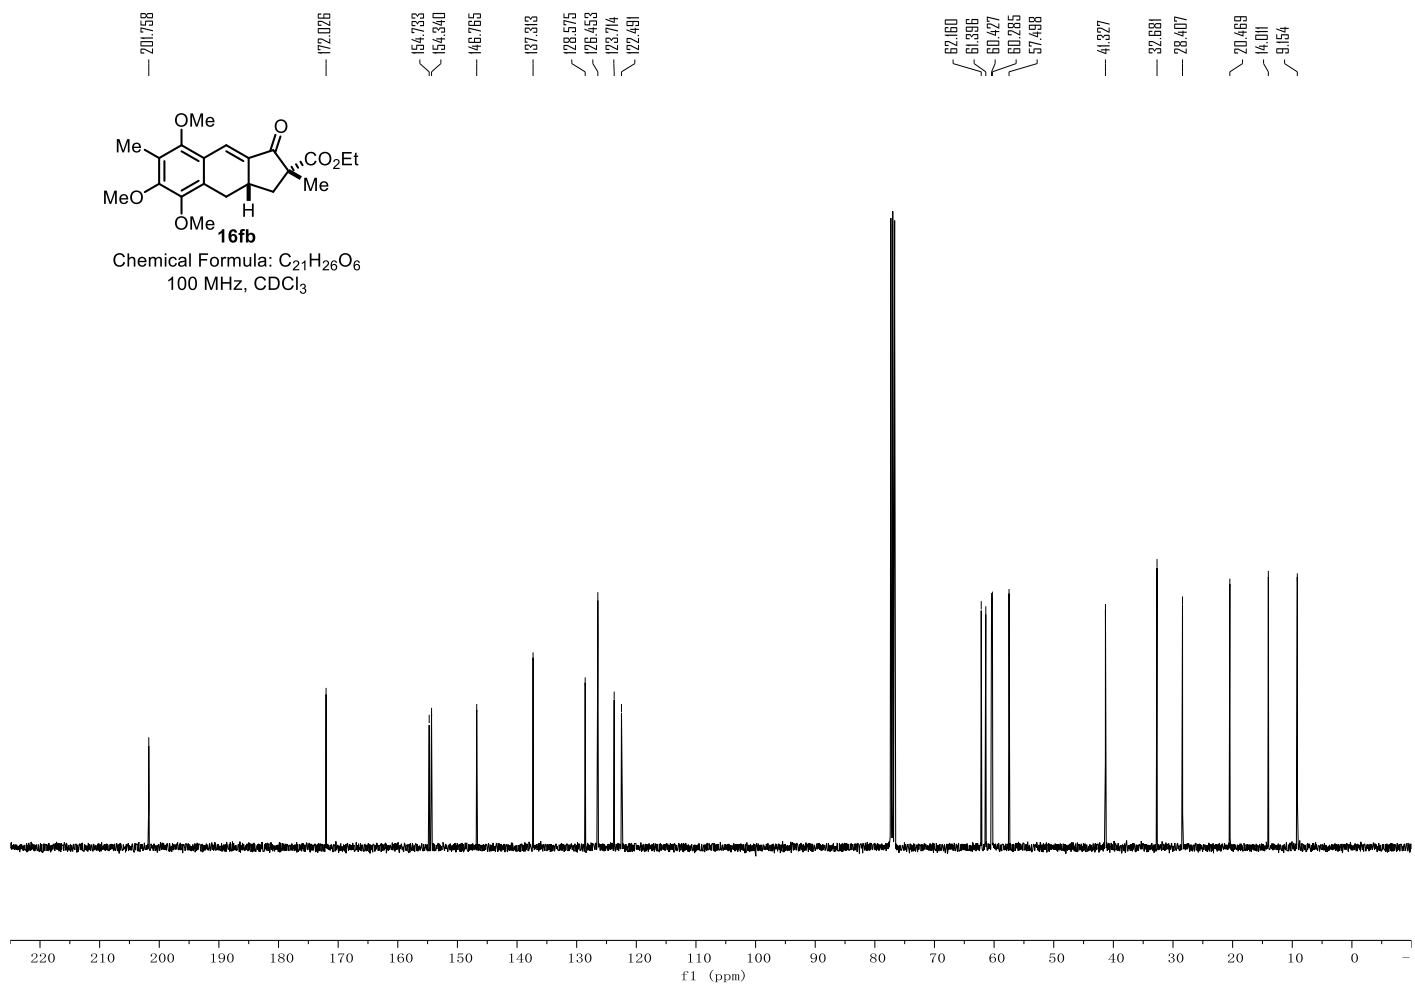

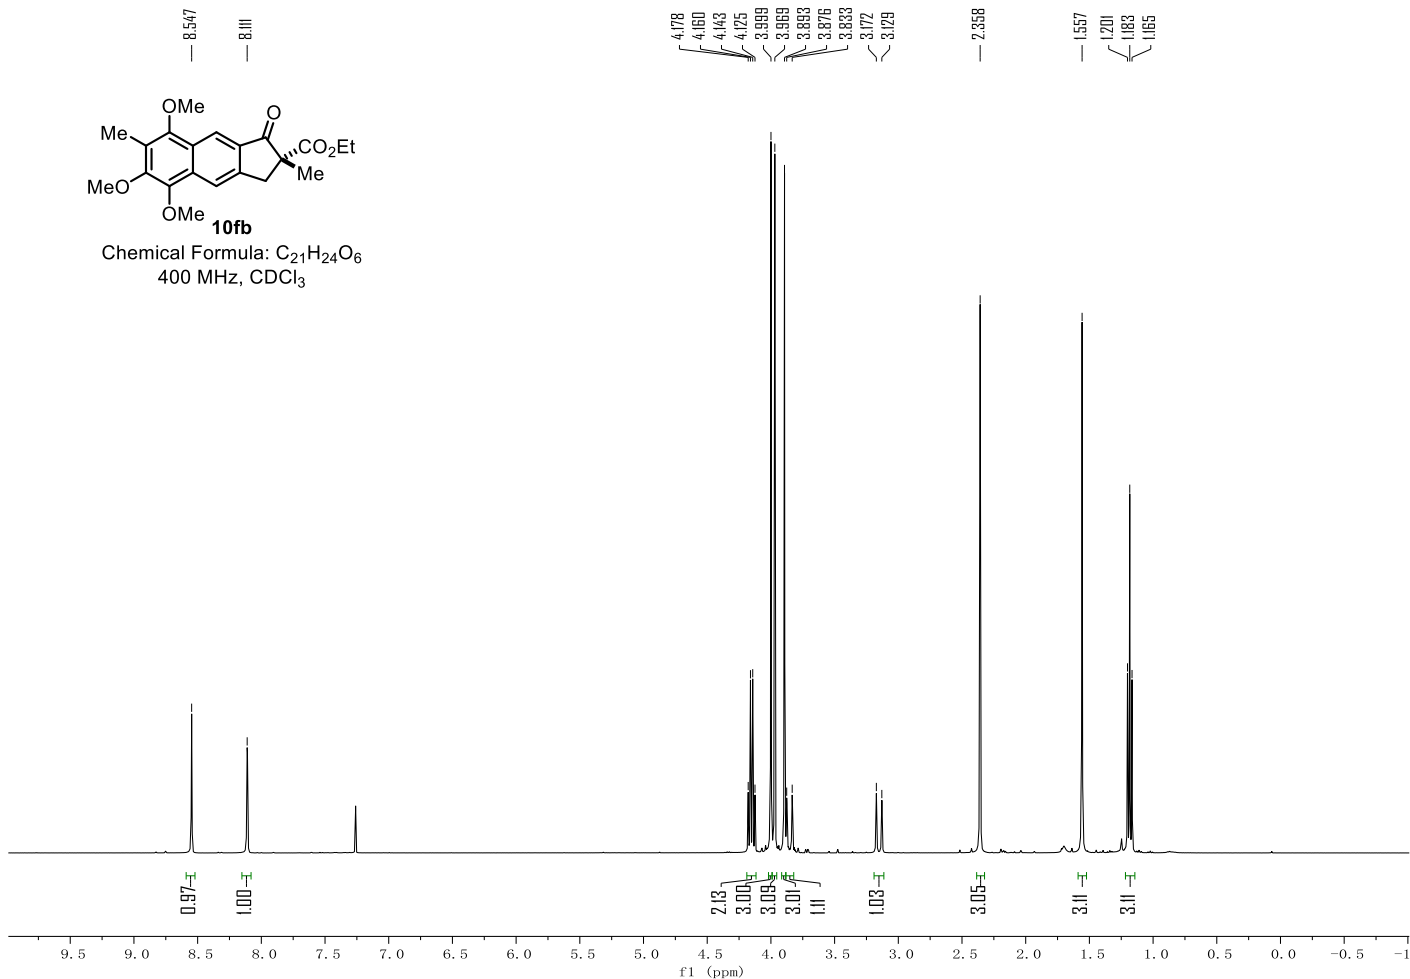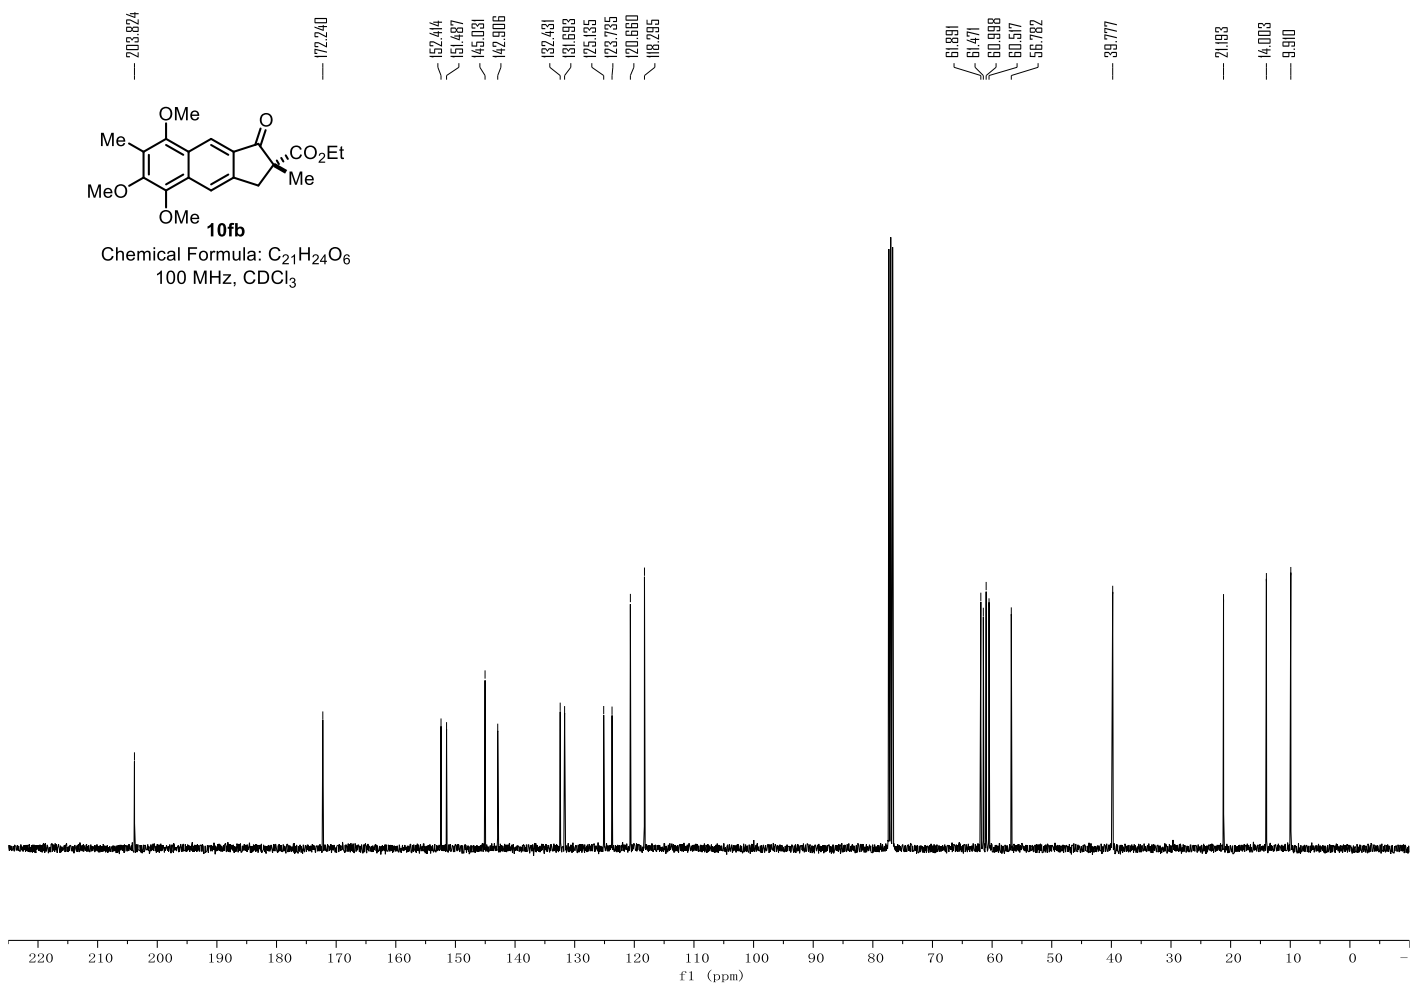

7.645  
7.640  
7.557  
7.549  
7.721  
7.707  
7.704  
7.200  
7.185  
7.180  
7.167  
7.154  
7.145  
7.128  
7.071  
7.053  
7.033  
6.995  
6.558  
6.474  
6.439

3.726  
3.692  
2.878  
2.858  
2.834  
2.825  
2.817  
2.808  
2.749  
2.728  
2.668  
2.629  
2.589  
2.519  
2.507  
2.481  
2.464  
2.433  
2.423  
2.379  
2.369  
2.326  
2.263  
2.234  
2.183  
2.040  
1.840  
1.786  
1.127  
0.904

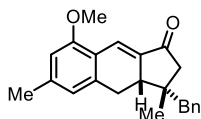

**16ac**

mixture of two isomers  
Chemical Formula: C<sub>23</sub>H<sub>24</sub>O<sub>2</sub>  
400 MHz, CDCl<sub>3</sub>

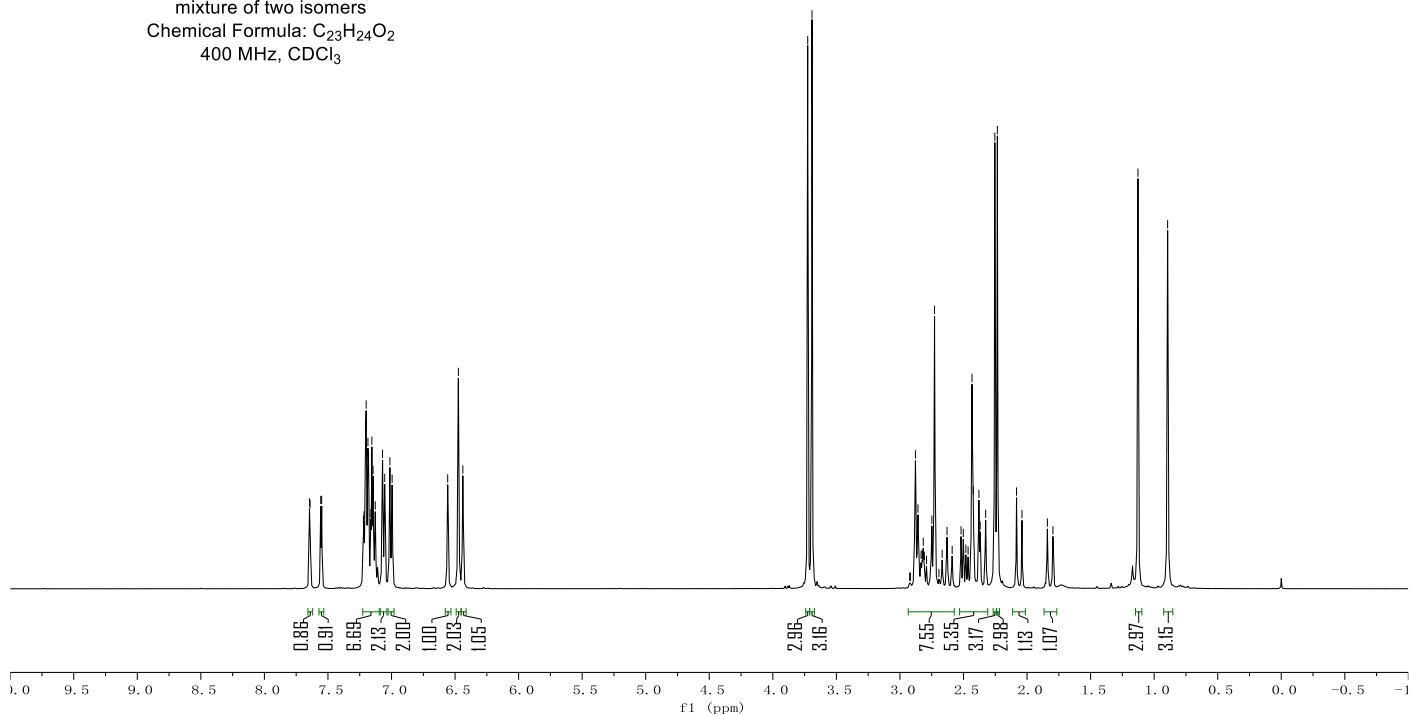

204.695  
204.276  
157.847  
157.730  
141.551  
141.459  
138.181  
137.795  
137.597  
136.342  
136.051  
131.835  
130.089  
128.155  
127.970  
126.475  
126.144  
124.663  
124.560  
121.762  
121.634  
119.165  
119.123  
110.063  
109.964

55.451  
55.418  
52.884  
50.337  
47.708  
46.409  
43.600  
41.610  
40.483  
39.891  
28.839  
27.926  
24.431  
22.775  
21.979  
21.948

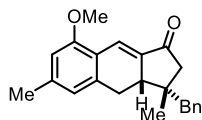

**16ac**

mixture of two isomers  
Chemical Formula: C<sub>23</sub>H<sub>24</sub>O<sub>2</sub>  
125 MHz, CDCl<sub>3</sub>

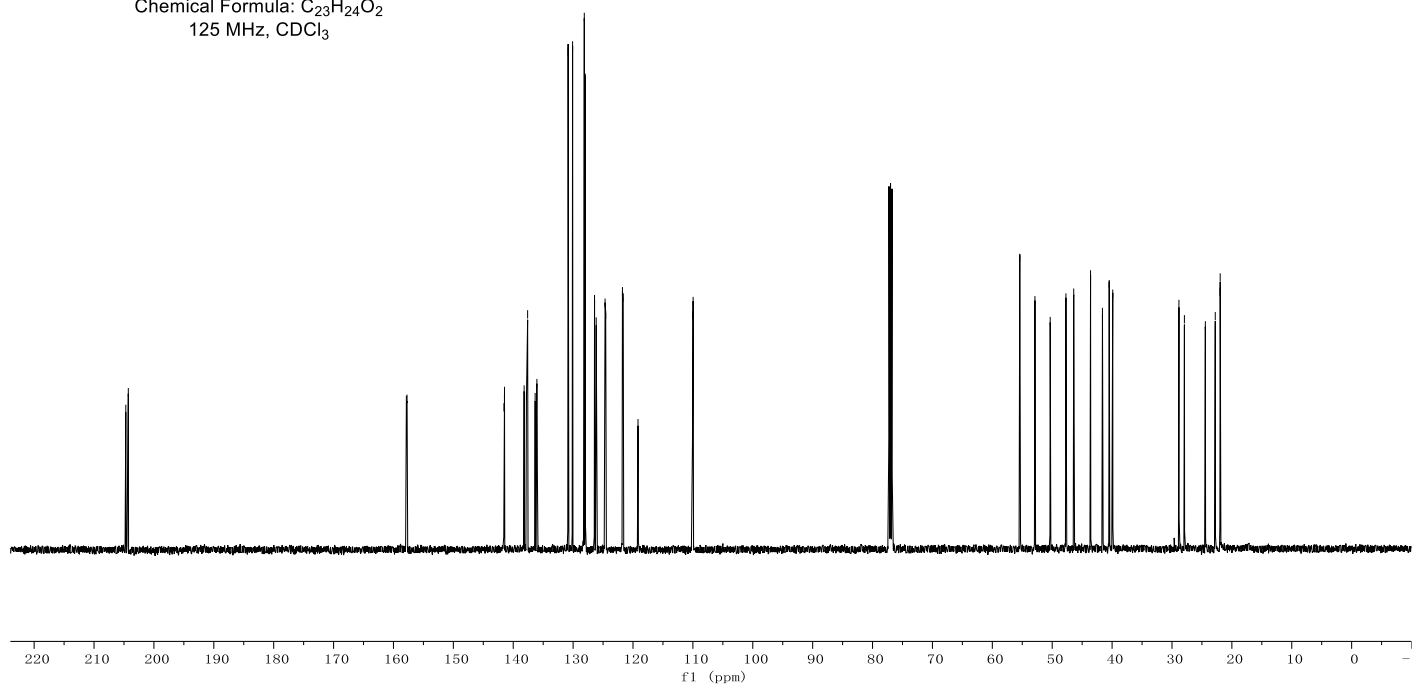

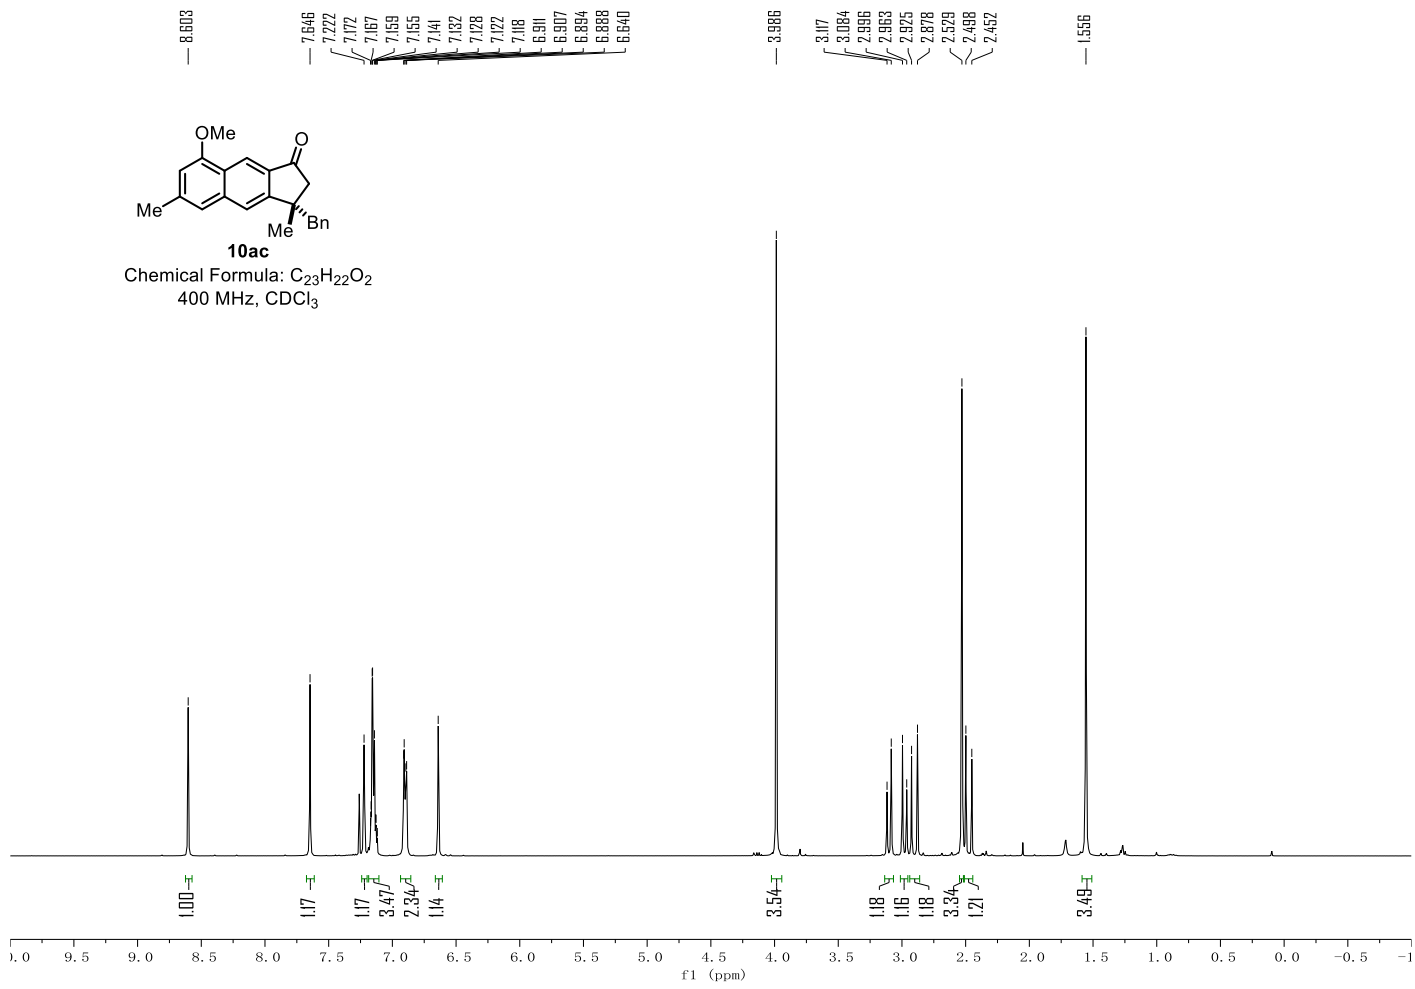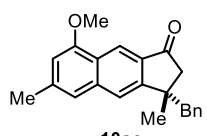

Chemical Formula: C<sub>23</sub>H<sub>22</sub>O<sub>2</sub>  
400 MHz, CDCl<sub>3</sub>

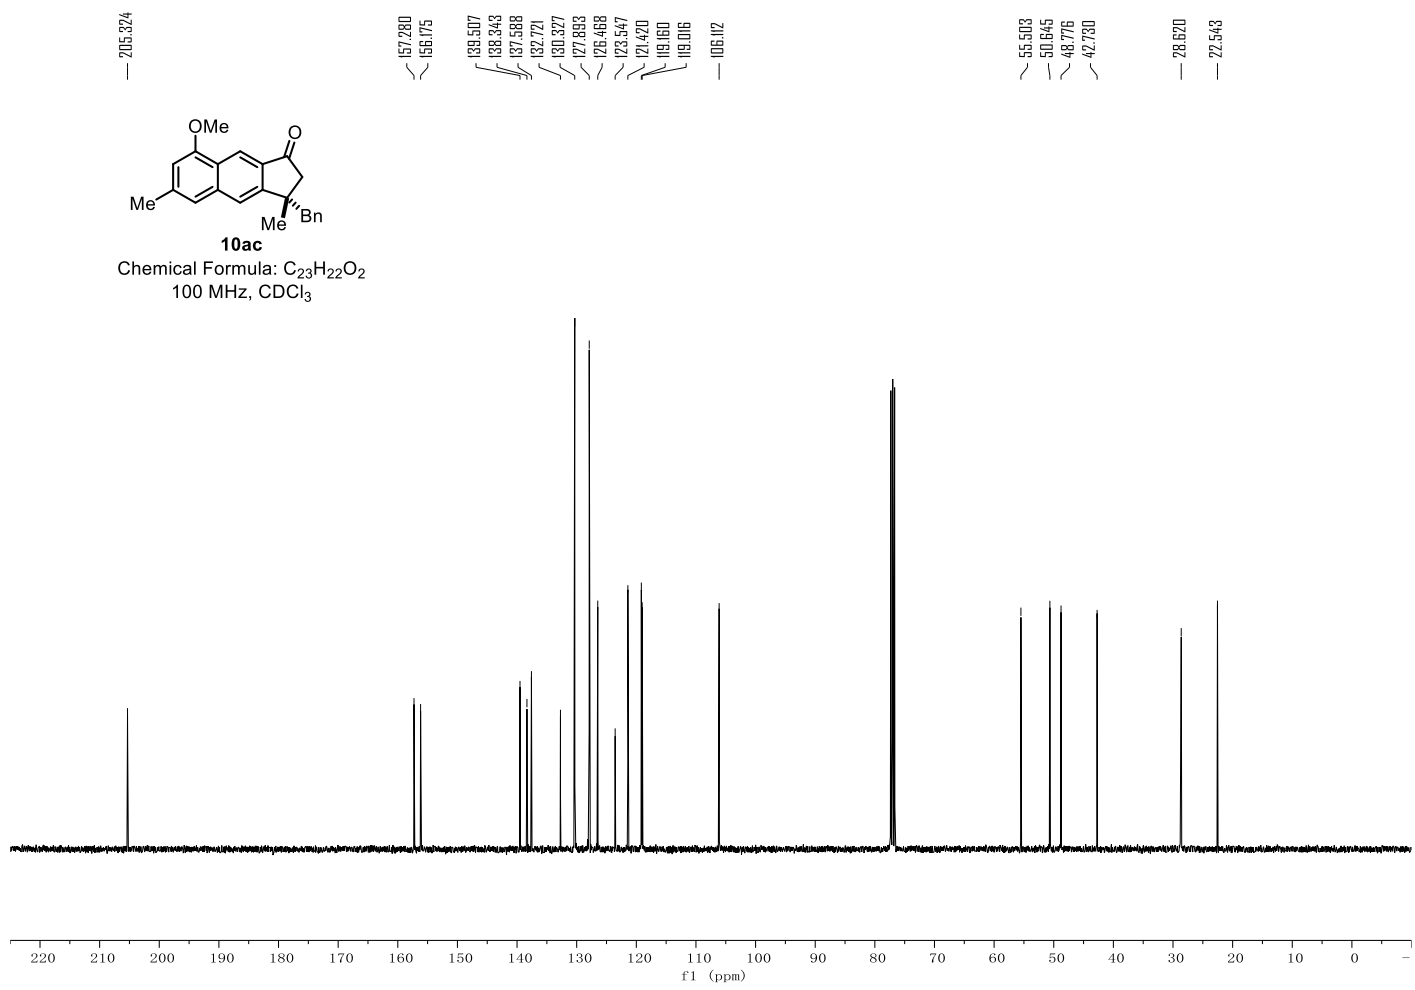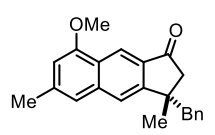

Chemical Formula: C<sub>23</sub>H<sub>22</sub>O<sub>2</sub>  
100 MHz, CDCl<sub>3</sub>



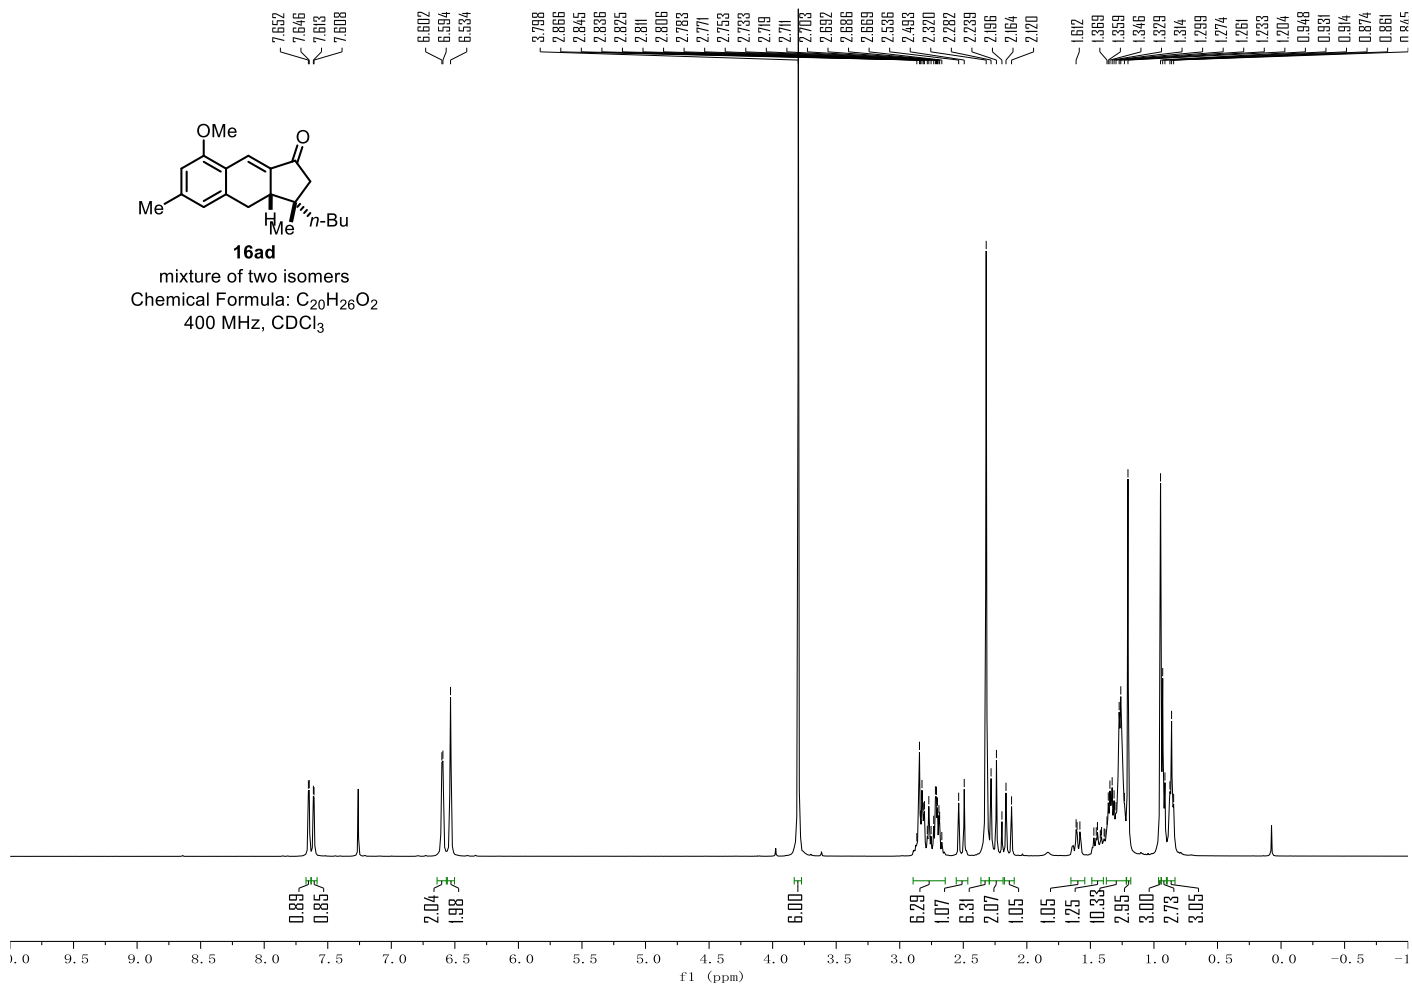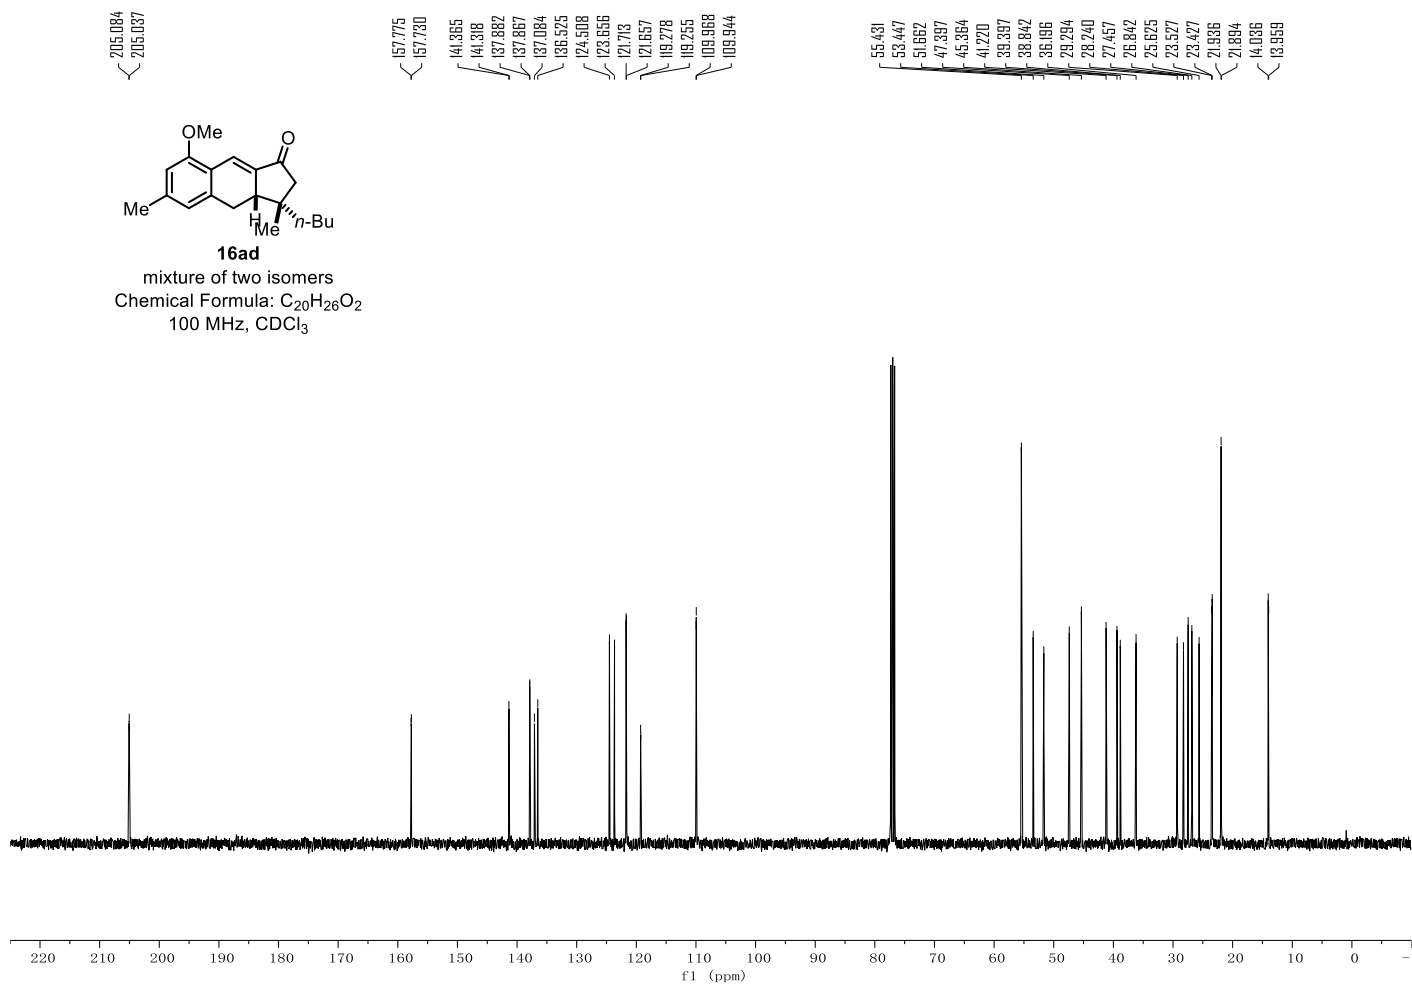

8.656  
7.660  
7.216  
6.611

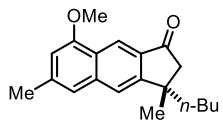

**10ad**

Chemical Formula:  $C_{20}H_{24}O_2$   
400 MHz,  $CDCl_3$

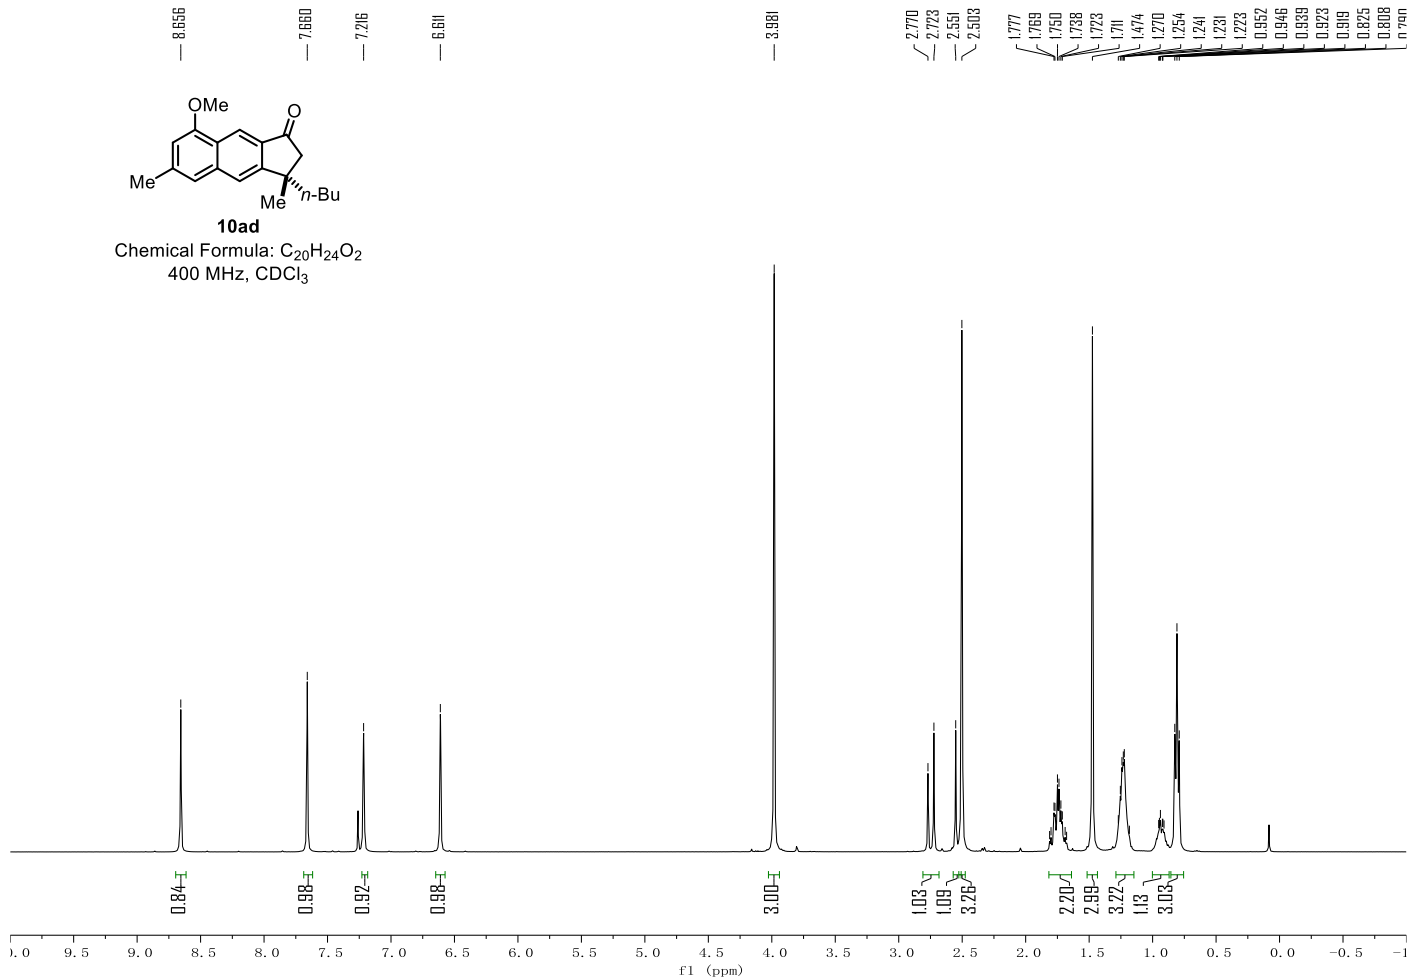

206.226

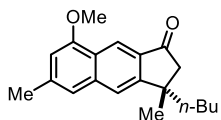

**10ad**

Chemical Formula:  $C_{20}H_{24}O_2$   
100 MHz,  $CDCl_3$

157.314, 157.199, 138.440, 138.618, 132.768, 123.466, 120.734, 119.101, 118.969, 105.943, 55.504, 51.057, 42.702, 41.639, 28.917, 27.191, 23.123, 22.514, 13.696

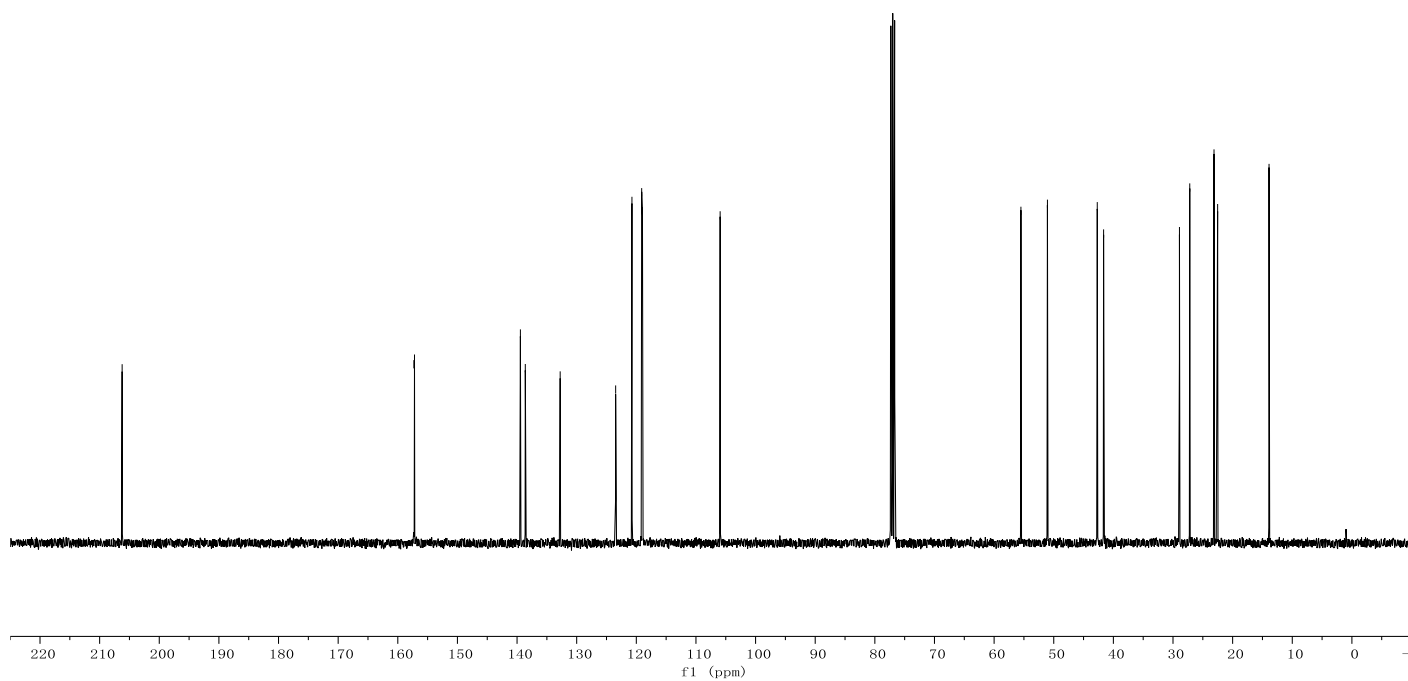

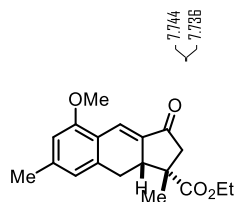

one isomer of **16ae**  
 Chemical Formula: C<sub>19</sub>H<sub>22</sub>O<sub>4</sub>  
 400 MHz, CDCl<sub>3</sub>

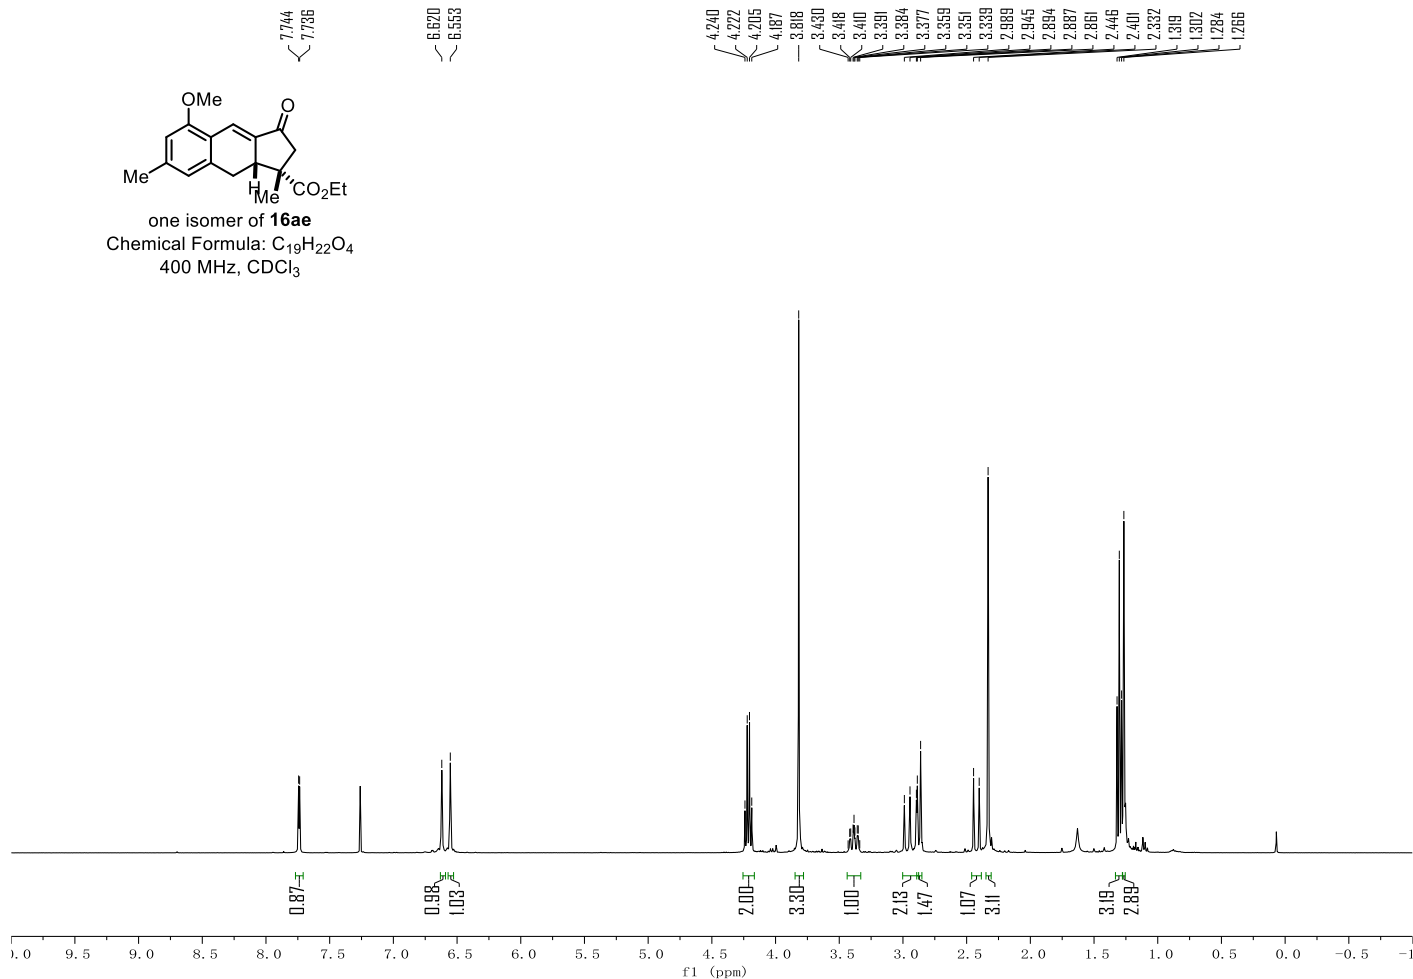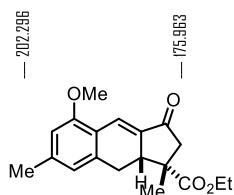

one isomer of **16ae**  
 Chemical Formula: C<sub>19</sub>H<sub>22</sub>O<sub>4</sub>  
 100 MHz, CDCl<sub>3</sub>

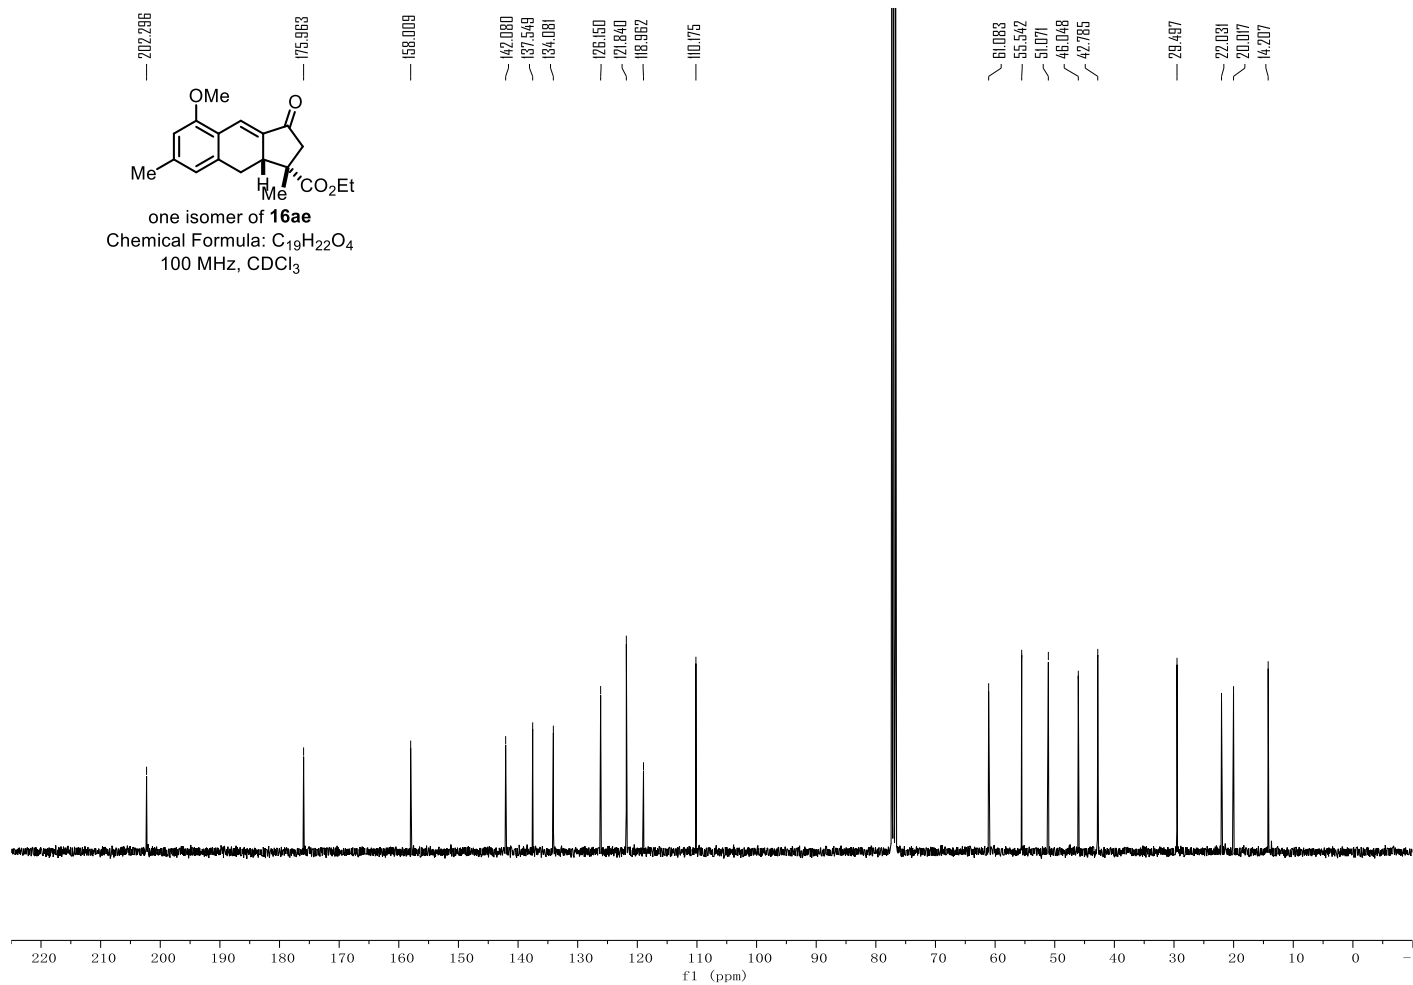

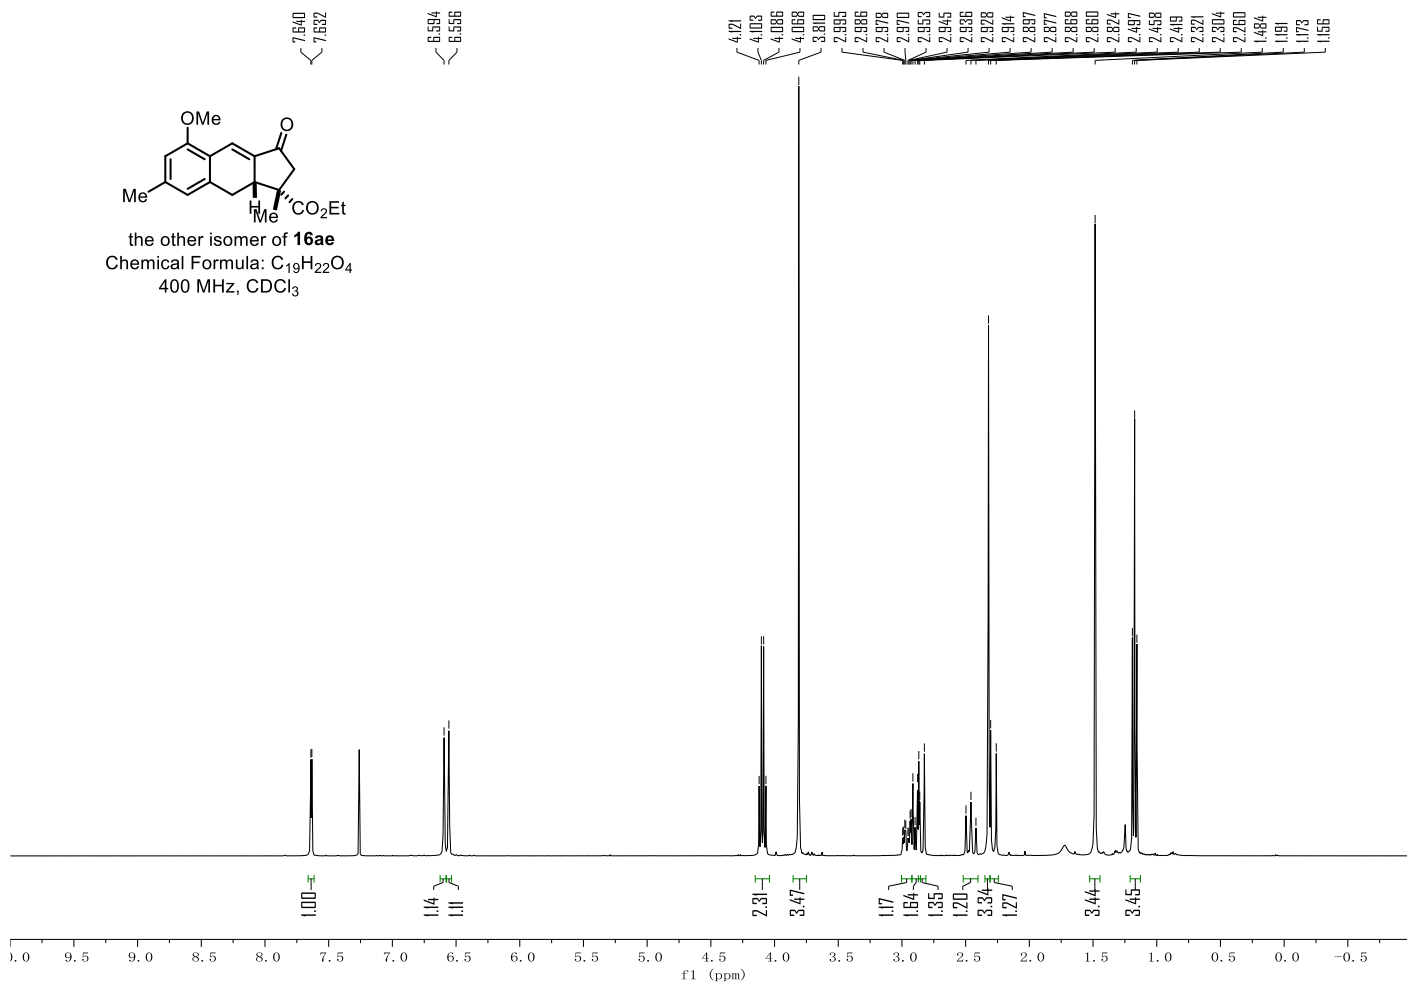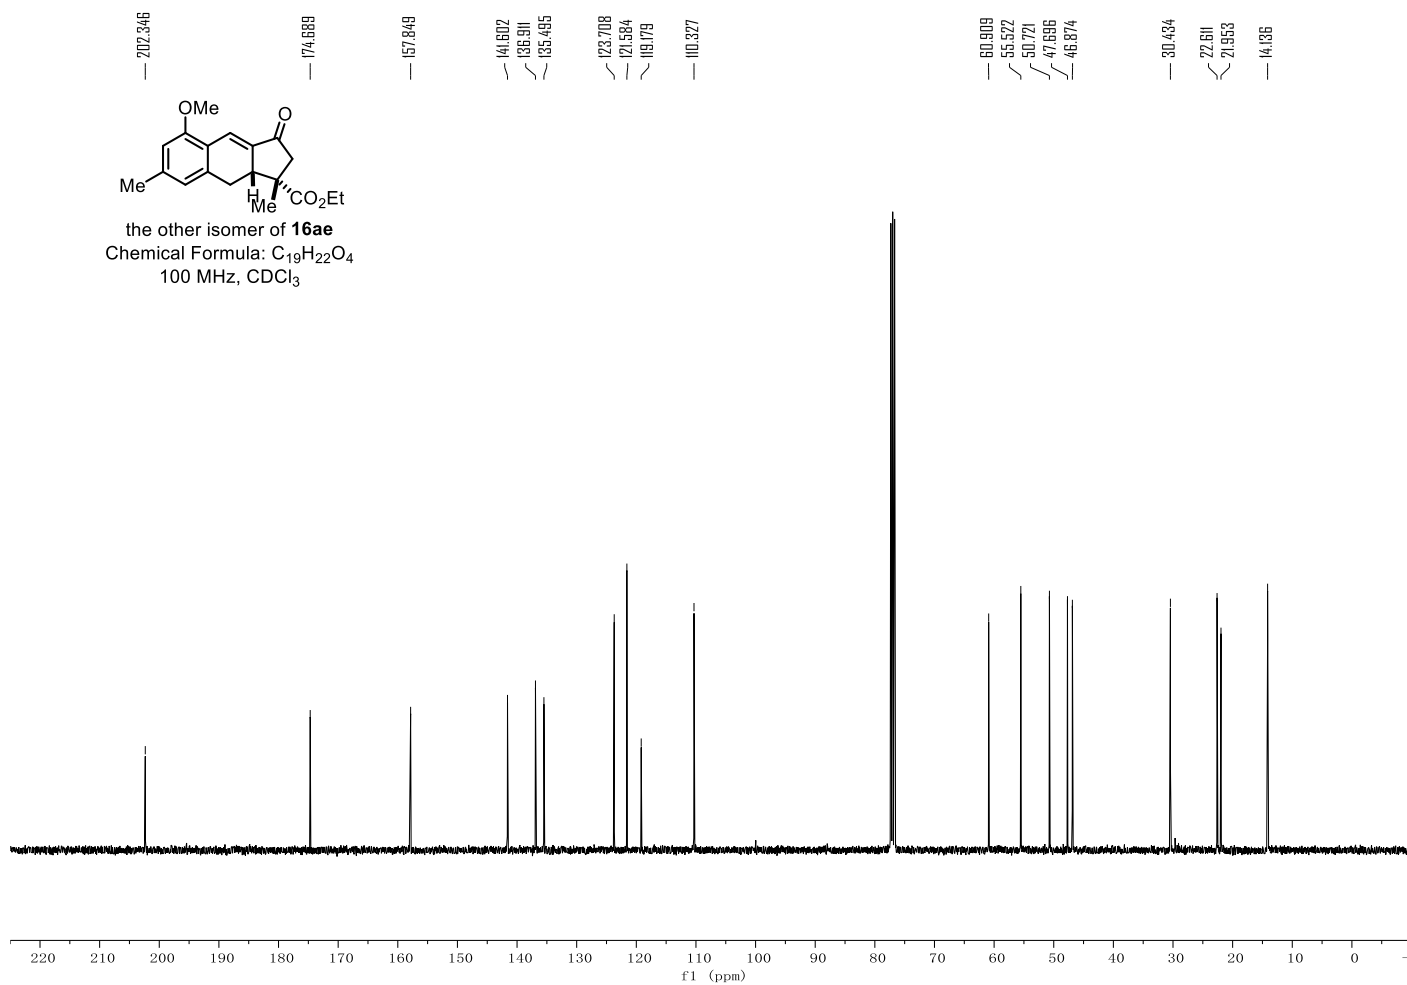

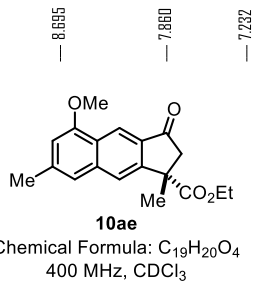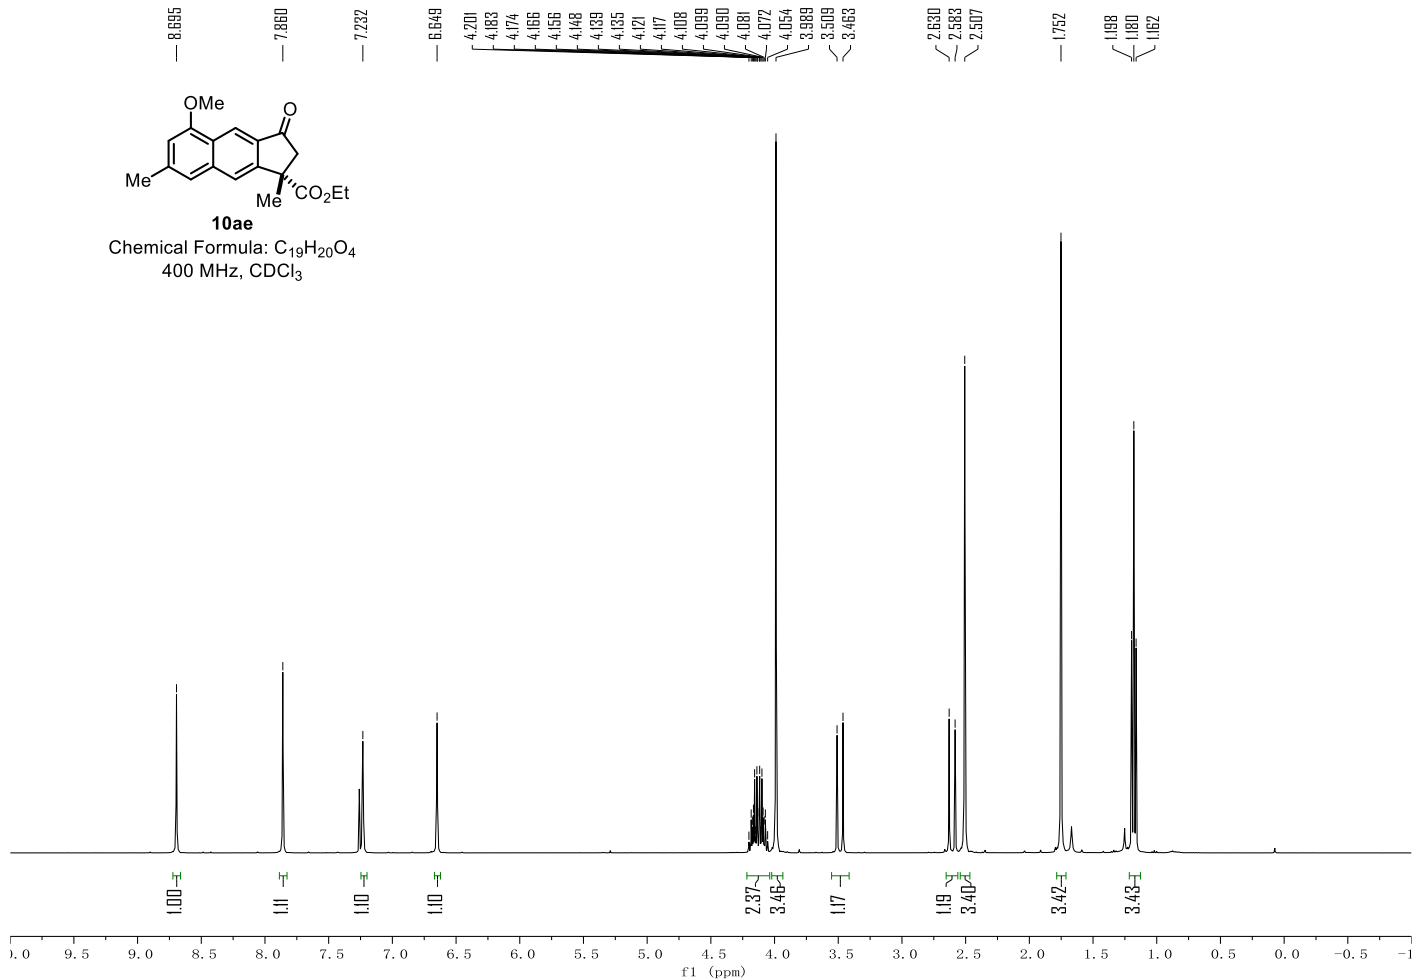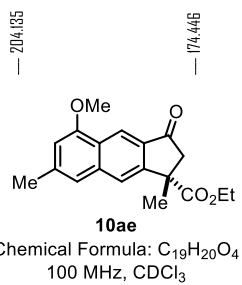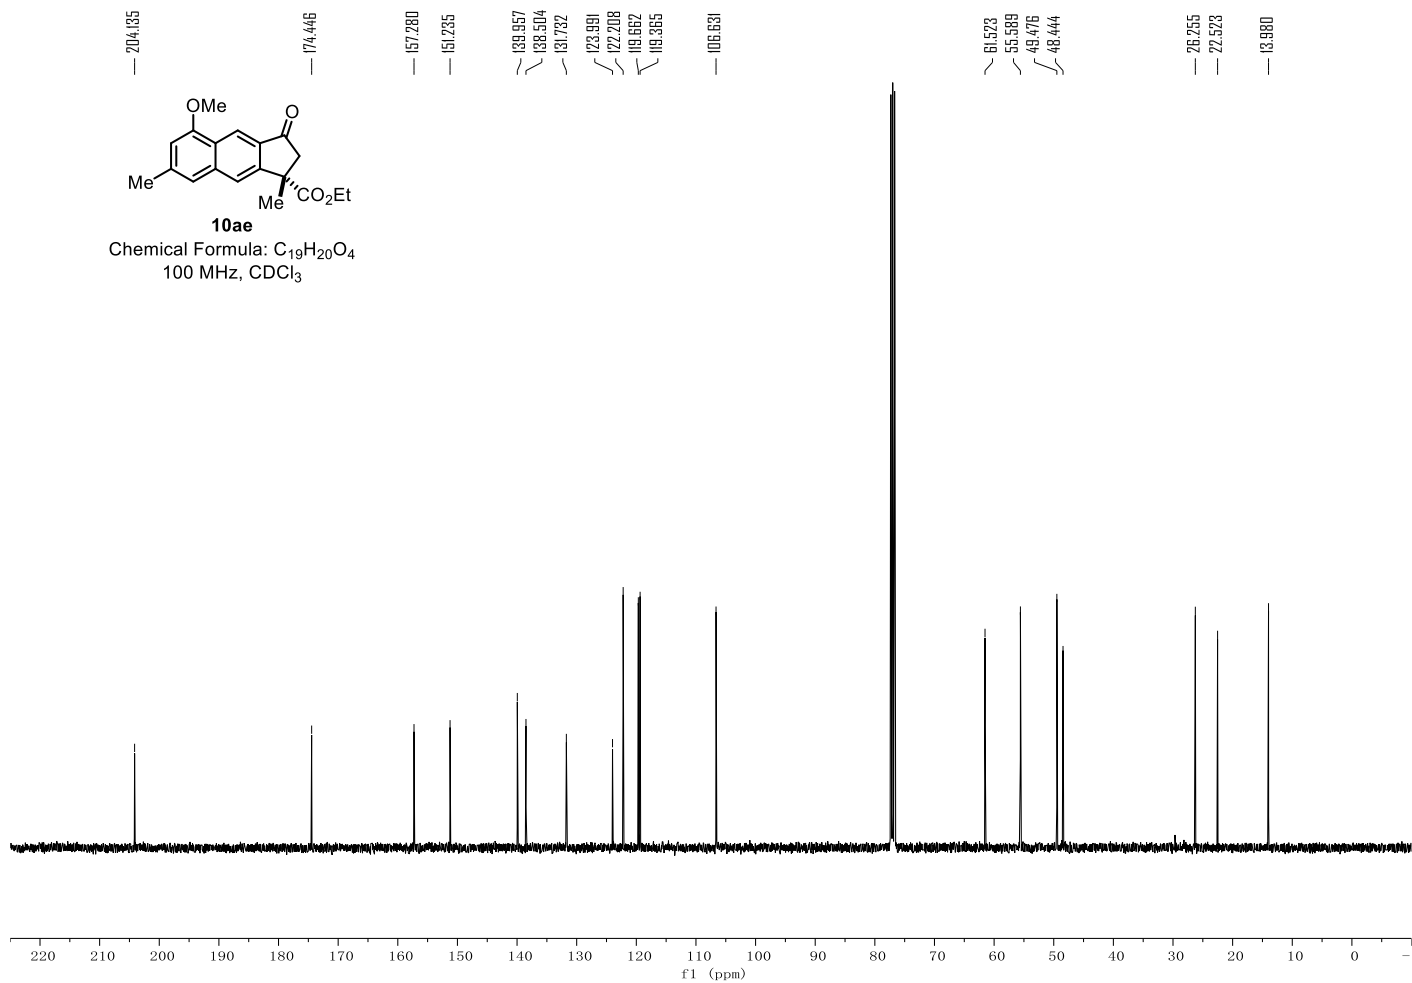

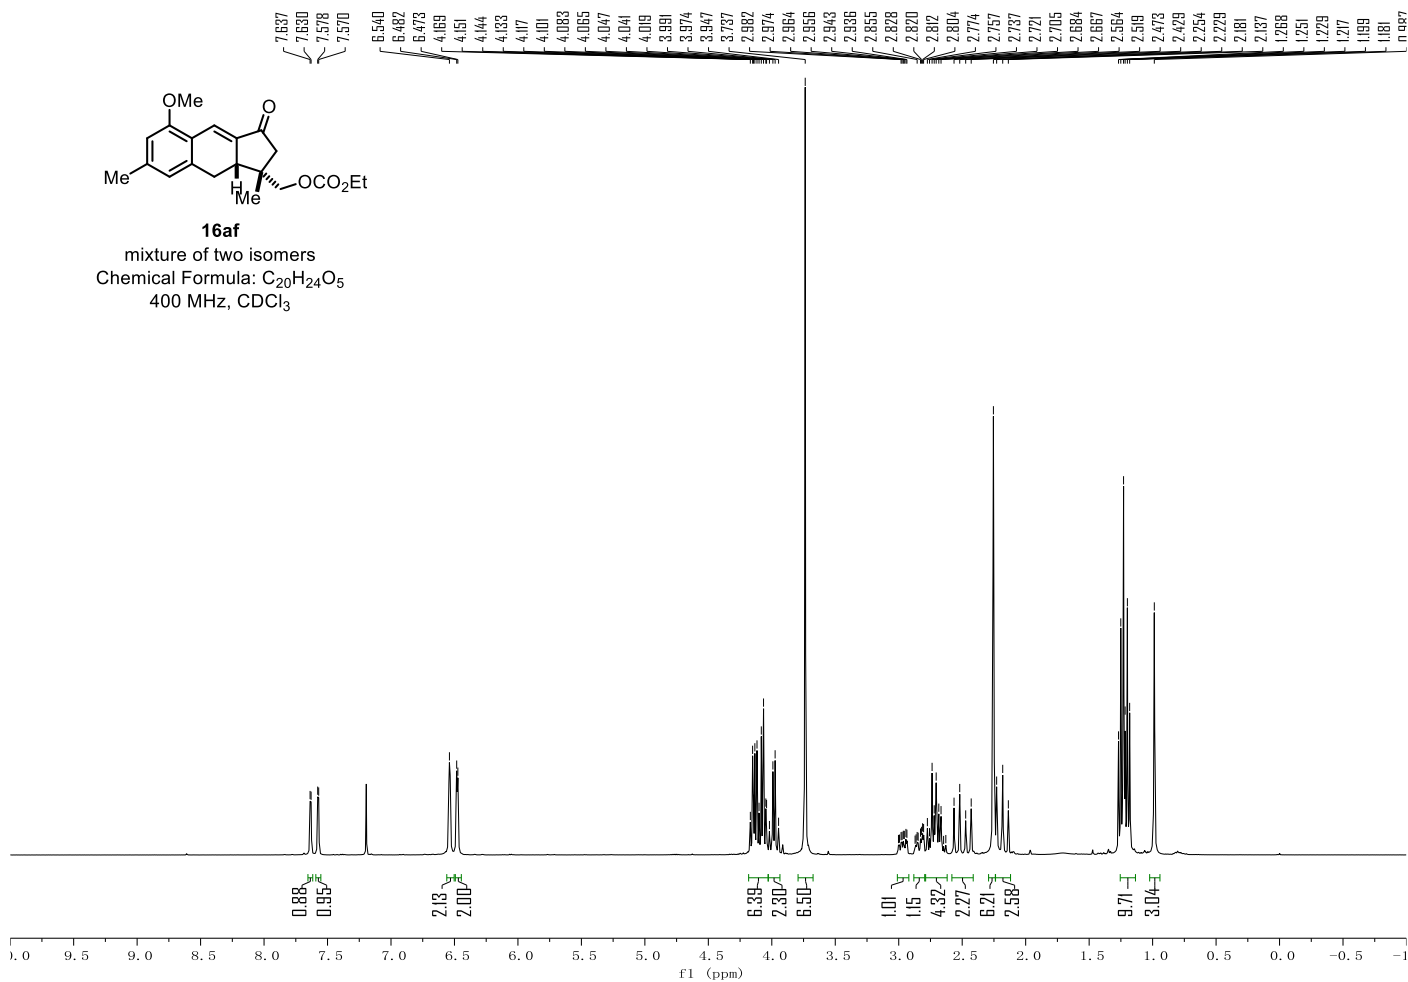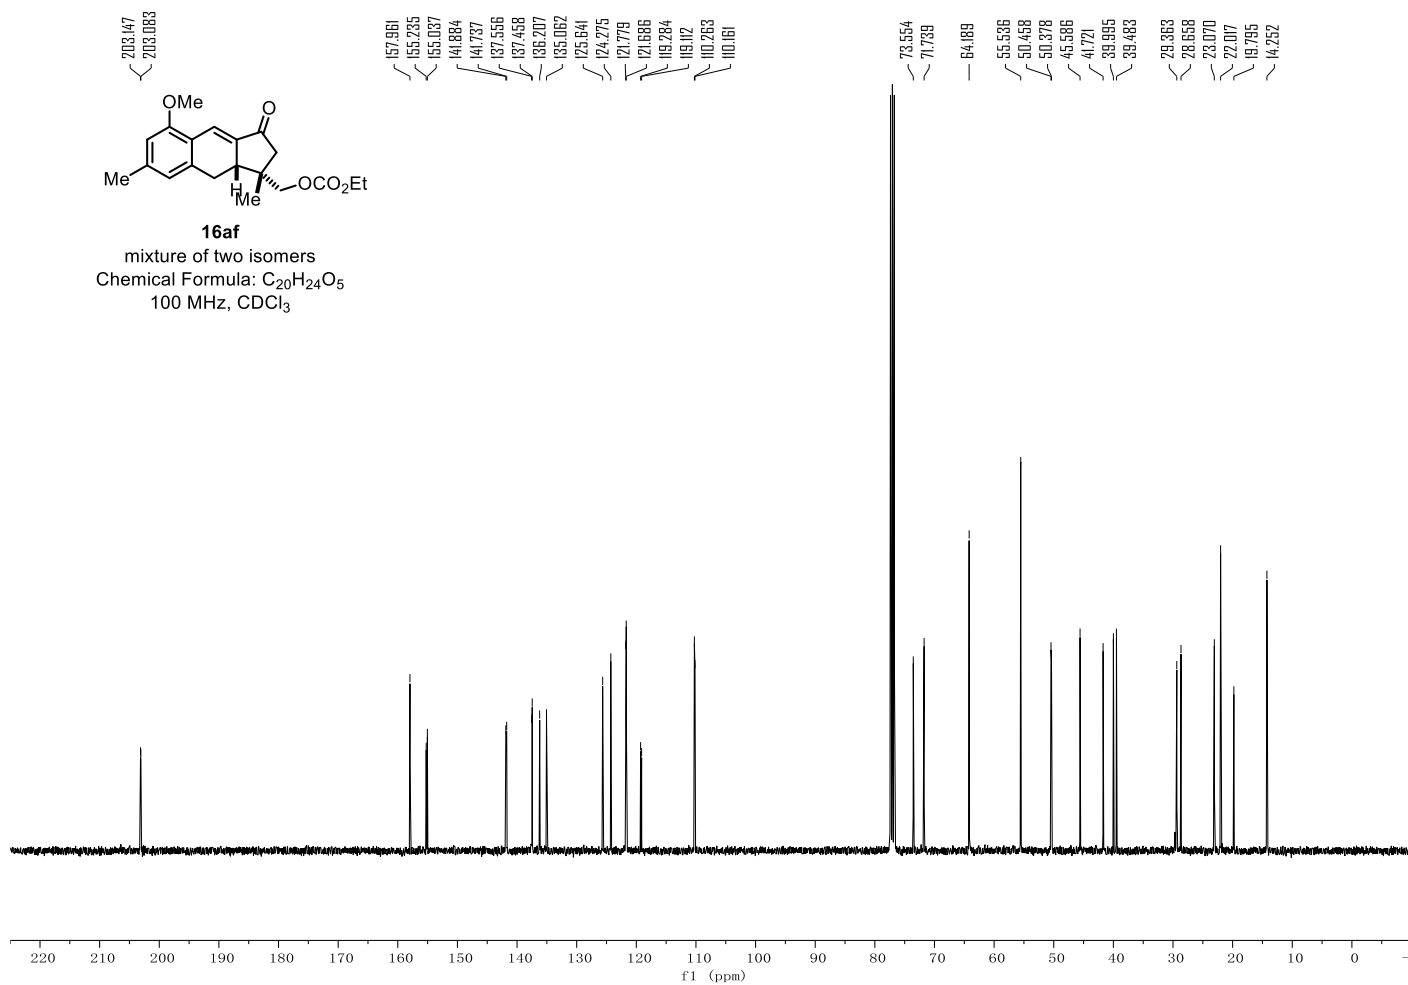

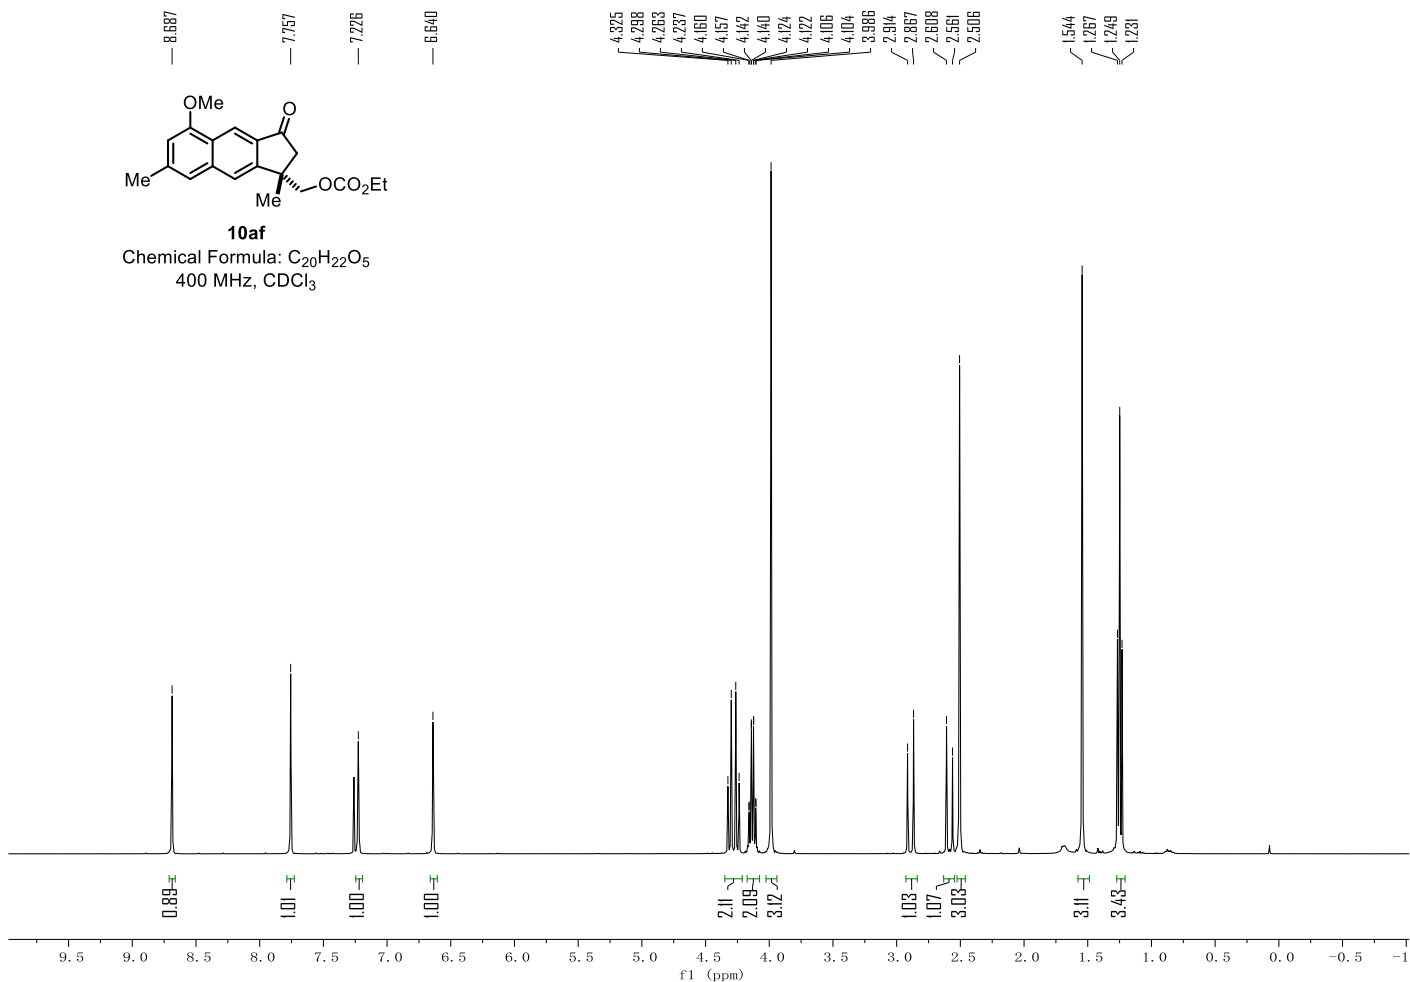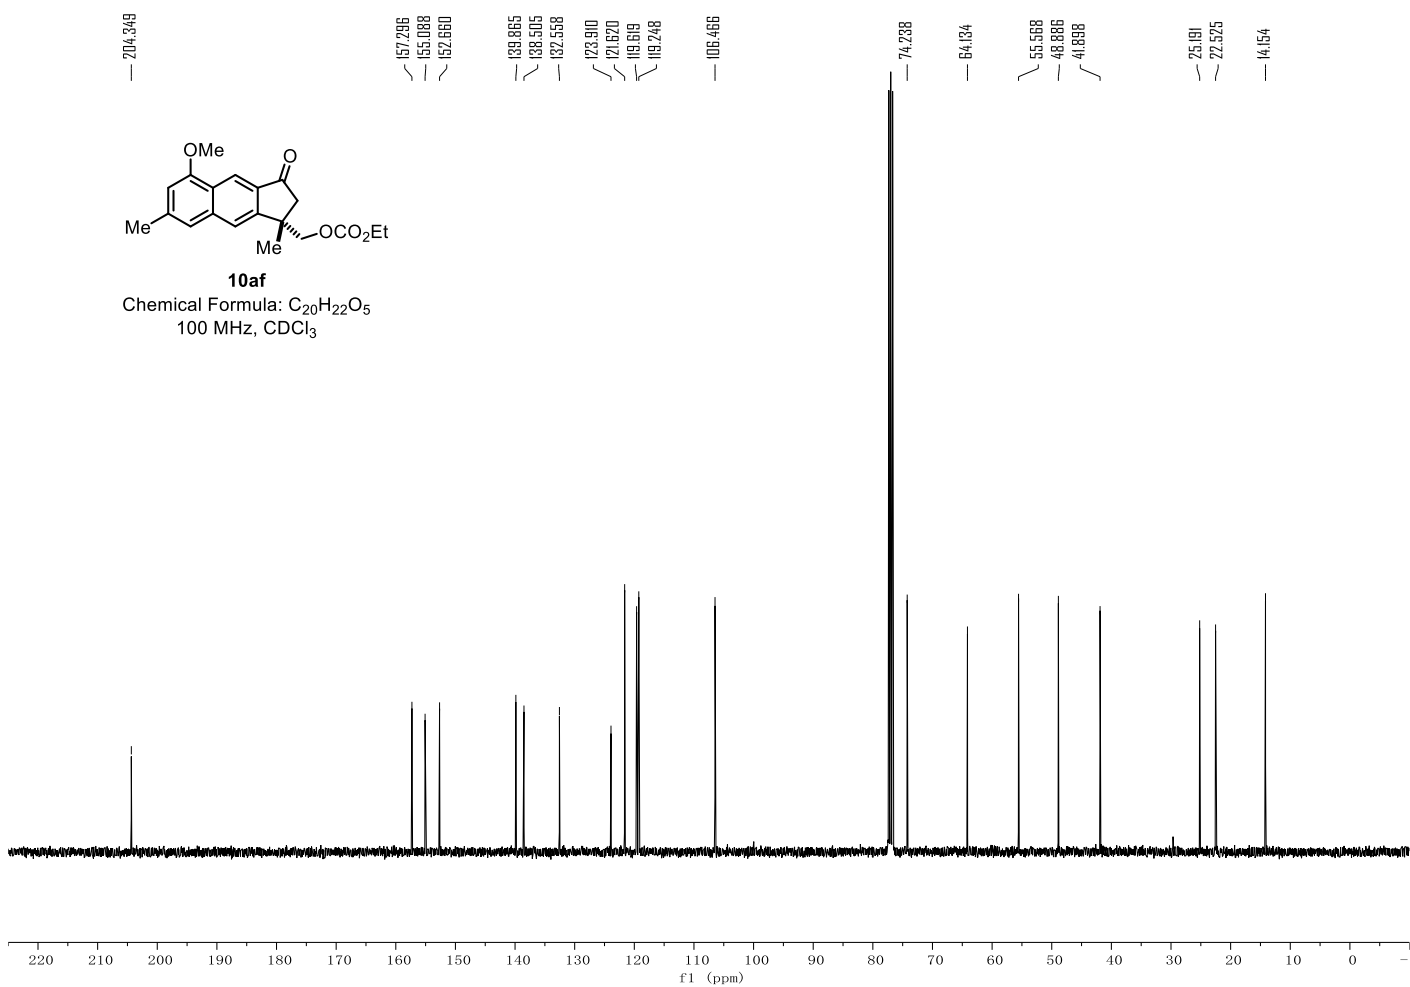

7.724 7.718 6.601 6.557 4.342 4.320 4.183 4.179 4.165 4.150 4.147 4.132 4.118 4.108 4.107 3.993 3.972 3.844 3.060 3.052 3.046 3.028 3.021 3.014 3.008 3.001 2.993 2.988 2.981 2.976 2.971 2.963 2.956 2.950 2.946 2.937 2.937 2.938 2.935 2.929 2.921 2.911 2.905 2.891 2.881 2.861 2.851 2.845 2.834 2.826 2.816 2.809 2.799 2.792 2.786 2.776 2.769 2.763 2.756 2.751 2.745 2.734 2.726 2.716 2.709 2.699 2.684 2.676 2.666 2.656 2.649 2.643 2.637 2.631 2.625 2.619 2.613 2.607 2.601 2.595 2.589 2.583 2.577 2.571 2.565 2.559 2.553 2.547 2.541 2.535 2.529 2.523 2.517 2.511 2.505 2.499 2.493 2.487 2.481 2.475 2.469 2.463 2.457 2.451 2.445 2.439 2.433 2.427 2.421 2.415 2.409 2.403 2.397 2.391 2.385 2.379 2.373 2.367 2.361 2.355 2.349 2.343 2.337 2.331 2.325 2.319 2.313 2.307 2.301 2.295 2.289 2.283 2.277 2.271 2.265 2.259 2.253 2.247 2.241 2.235 2.229 2.223 2.217 2.211 2.205 2.199 2.193 2.187 2.181 2.175 2.169 2.163 2.157 2.151 2.145 2.139 2.133 2.127 2.121 2.115 2.109 2.103 2.097 2.091 2.085 2.079 2.073 2.067 2.061 2.055 2.049 2.043 2.037 2.031 2.025 2.019 2.013 2.007 2.001 1.995 1.989 1.983 1.977 1.971 1.965 1.959 1.953 1.947 1.941 1.935 1.929 1.923 1.917 1.911 1.905 1.899 1.893 1.887 1.881 1.875 1.869 1.863 1.857 1.851 1.845 1.839 1.833 1.827 1.821 1.815 1.809 1.803 1.797 1.791 1.785 1.779 1.773 1.767 1.761 1.755 1.749 1.743 1.737 1.731 1.725 1.719 1.713 1.707 1.701 1.695 1.689 1.683 1.677 1.671 1.665 1.659 1.653 1.647 1.641 1.635 1.629 1.623 1.617 1.611 1.605 1.599 1.593 1.587 1.581 1.575 1.569 1.563 1.557 1.551 1.545 1.539 1.533 1.527 1.521 1.515 1.509 1.503 1.497 1.491 1.485 1.479 1.473 1.467 1.461 1.455 1.449 1.443 1.437 1.431 1.425 1.419 1.413 1.407 1.401 1.395 1.389 1.383 1.377 1.371 1.365 1.359 1.353 1.347 1.341 1.335 1.329 1.323 1.317 1.311 1.305 1.299 1.293 1.287 1.281 1.275 1.269 1.263 1.257 1.251 1.245 1.239 1.233 1.227 1.221 1.215 1.209 1.203 1.197 1.191 1.185 1.179 1.173 1.167 1.161 1.155 1.149 1.143 1.137 1.131 1.125 1.119 1.113 1.107 1.101 1.095 1.089 1.083 1.077 1.071 1.065 1.059 1.053 1.047 1.041 1.035 1.029 1.023 1.017 1.011 1.005 999 993 987 981 975 969 963 957 951 945 939 933 927 921 915 909 903 897 891 885 879 873 867 861 855 849 843 837 831 825 819 813 807 801 795 789 783 777 771 765 759 753 747 741 735 729 723 717 711 705 699 693 687 681 675 669 663 657 651 645 639 633 627 621 615 609 603 597 591 585 579 573 567 561 555 549 543 537 531 525 519 513 507 501 495 489 483 477 471 465 459 453 447 441 435 429 423 417 411 405 399 393 387 381 375 369 363 357 351 345 339 333 327 321 315 309 303 297 291 285 279 273 267 261 255 249 243 237 231 225 219 213 207 201 195 189 183 177 171 165 159 153 147 141 135 129 123 117 111 105 99 93 87 81 75 69 63 57 51 45 39 33 27 21 15 9 3 -1

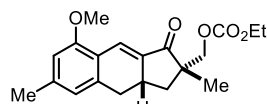

**16ag**

mixture of two isomers  
 Chemical Formula:  $C_{20}H_{24}O_5$   
 500 MHz,  $CDCl_3$

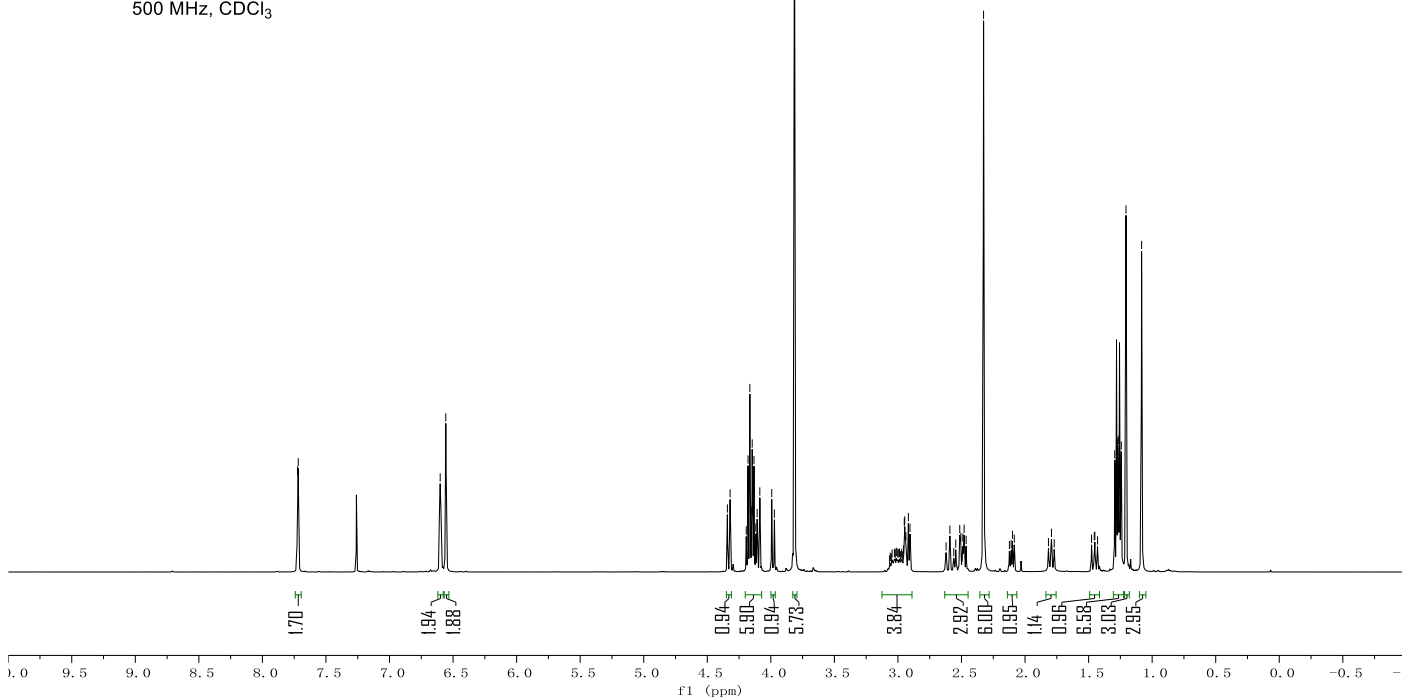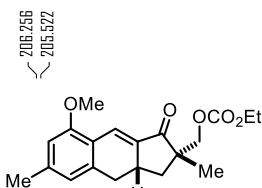

**16ag**

mixture of two isomers  
 Chemical Formula:  $C_{20}H_{24}O_5$   
 125 MHz,  $CDCl_3$

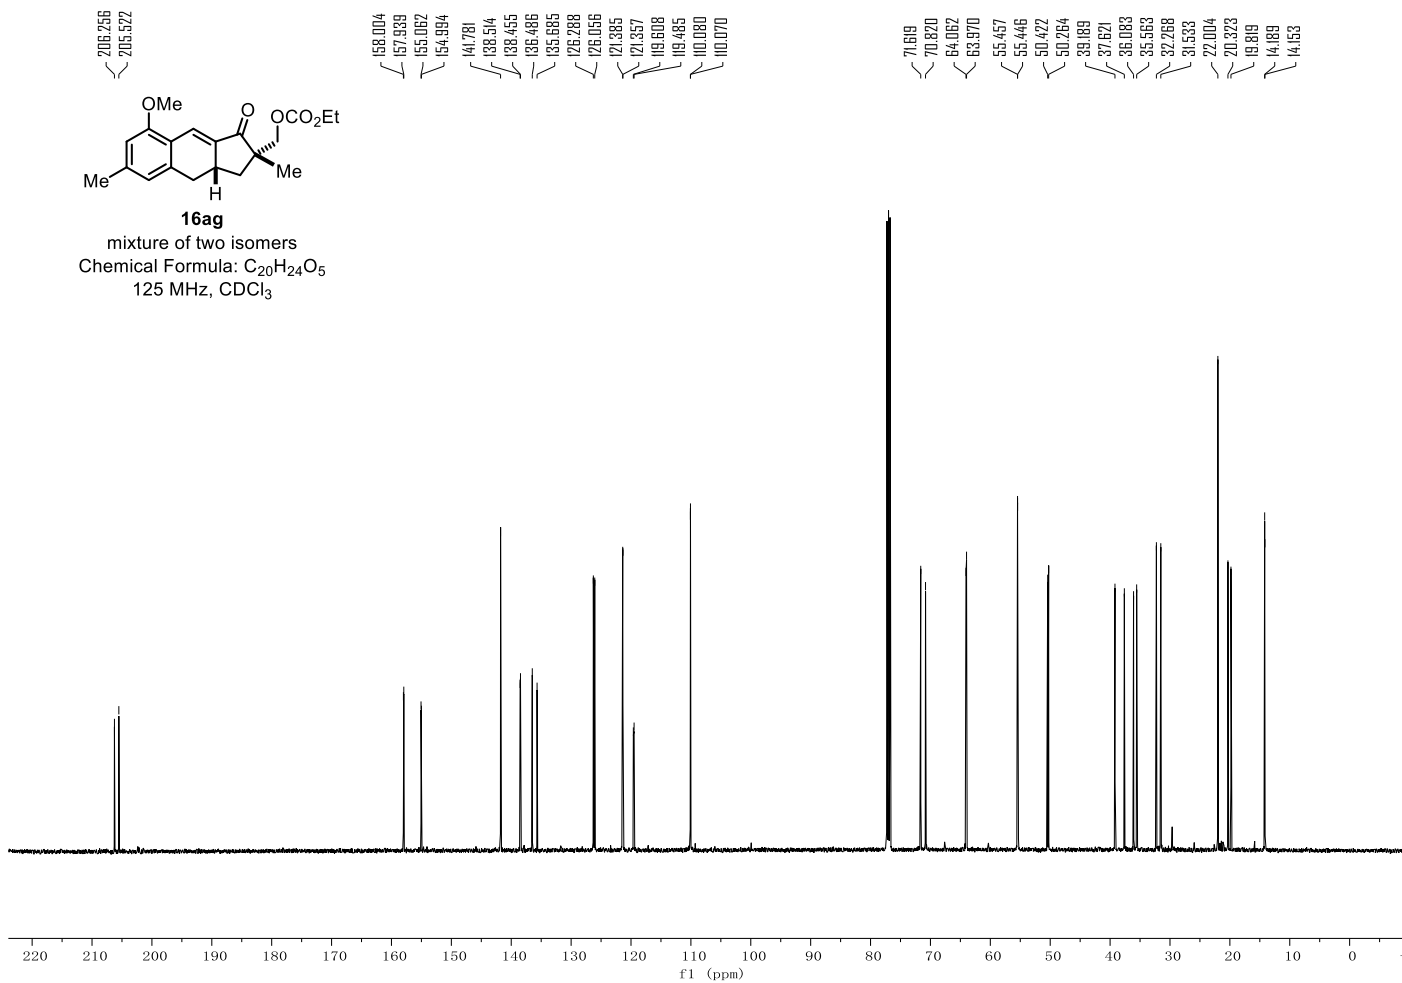



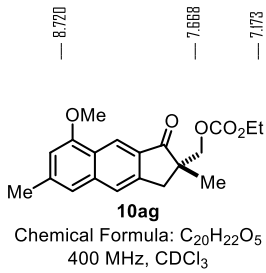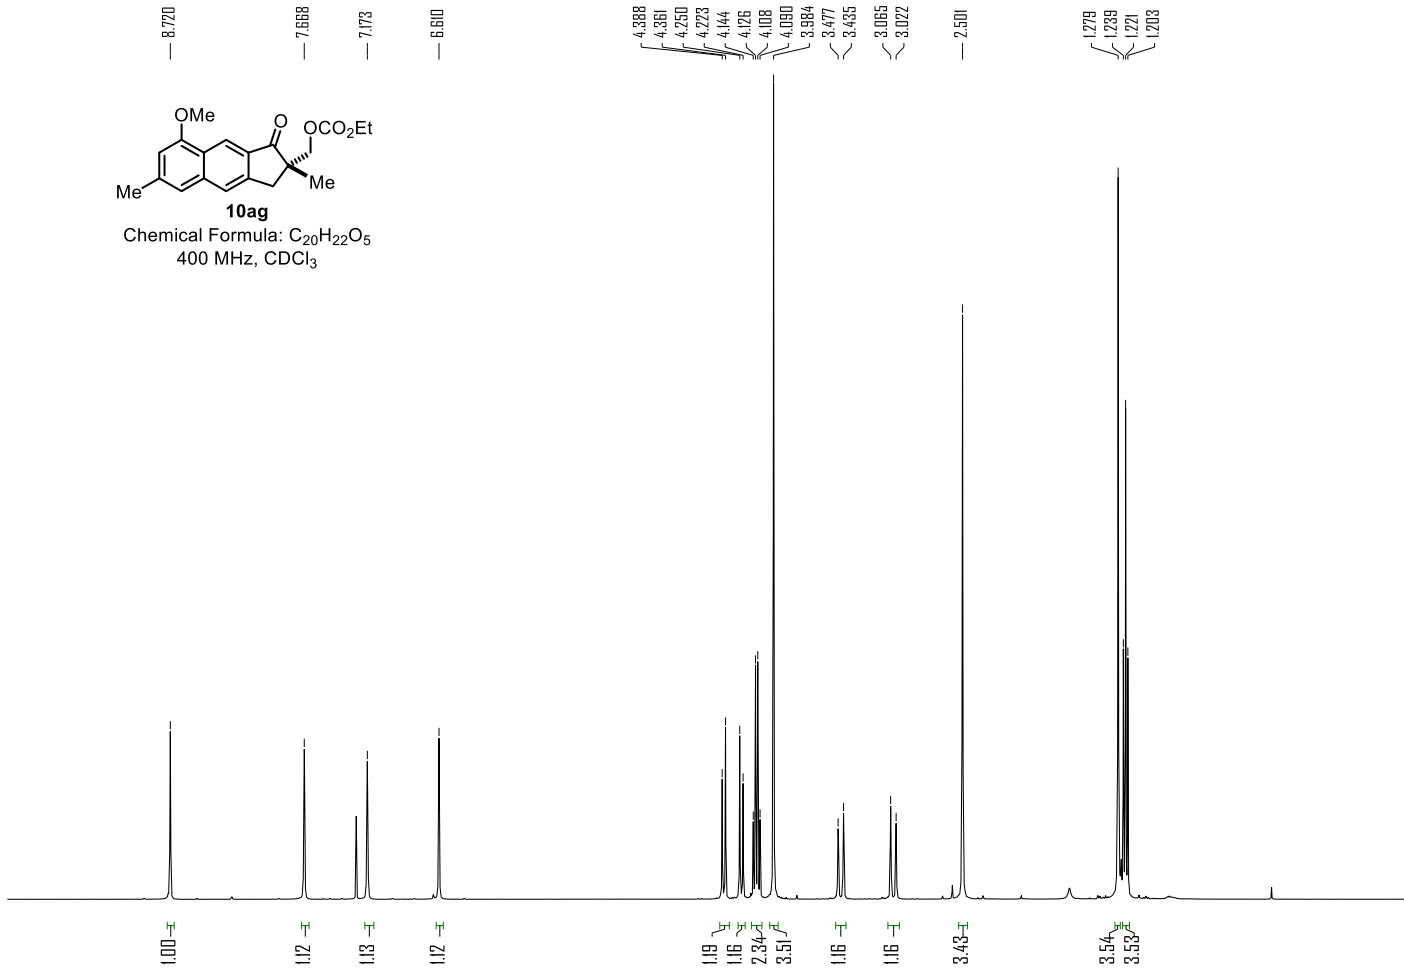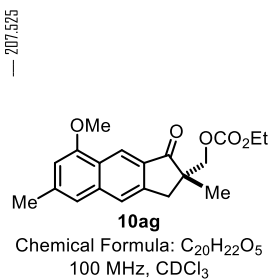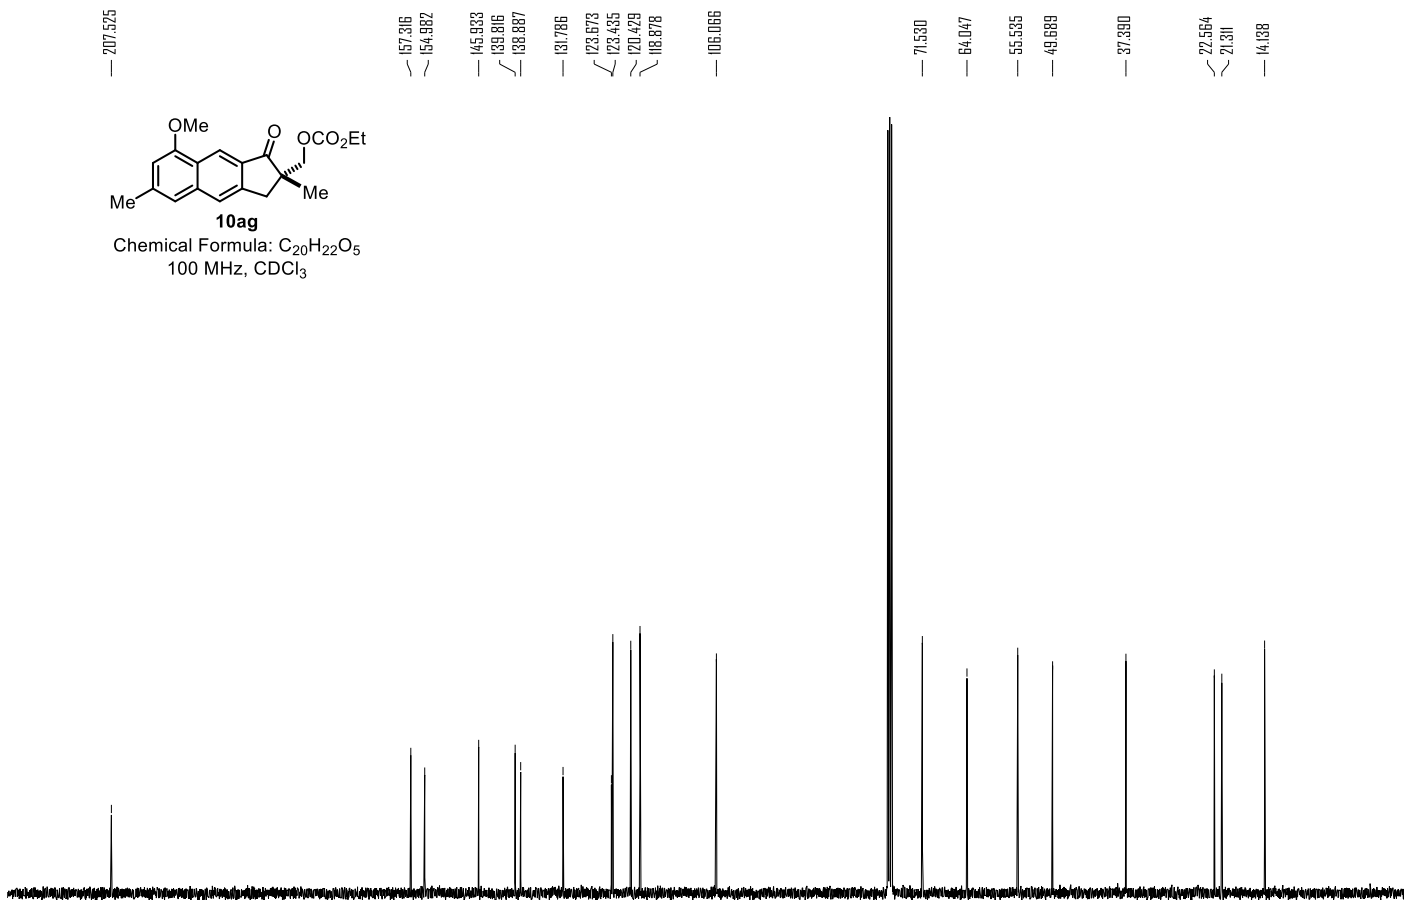

7.410 7.395 6.068 6.054 3.997 3.986 3.974 3.961 3.958 3.950 3.945 3.937 3.927 3.916 3.914 3.904 3.891 3.880 3.872 3.867 3.860 3.855 3.852 3.846 3.844 3.829 3.829 2.701 2.181 2.167 2.156 2.142 2.131 2.125 2.116 1.858 1.841 1.824 1.807 1.796 1.786 1.777 1.752 1.724 1.706 1.696 1.689 1.680 1.672 1.659 1.639 1.628 1.618 1.603 1.593 1.576 1.568 1.553 1.542 1.540 1.535 1.525 1.269

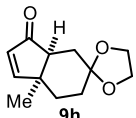

Chemical Formula: C<sub>12</sub>H<sub>16</sub>O<sub>3</sub>  
400 MHz, CDCl<sub>3</sub>

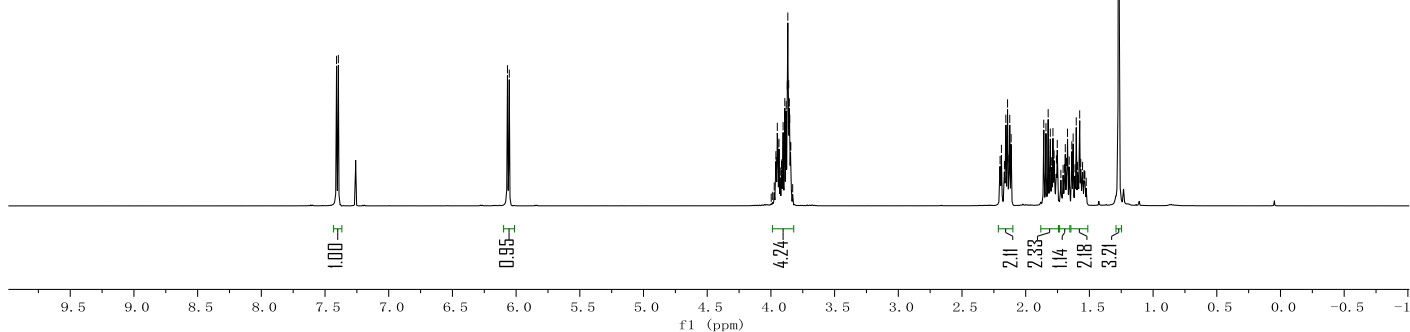

210.048 171.067 130.535 106.296 64.184 63.967 51.992 43.326 32.644 31.076 30.747 25.440

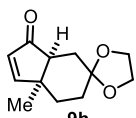

Chemical Formula: C<sub>12</sub>H<sub>16</sub>O<sub>3</sub>  
100 MHz, CDCl<sub>3</sub>

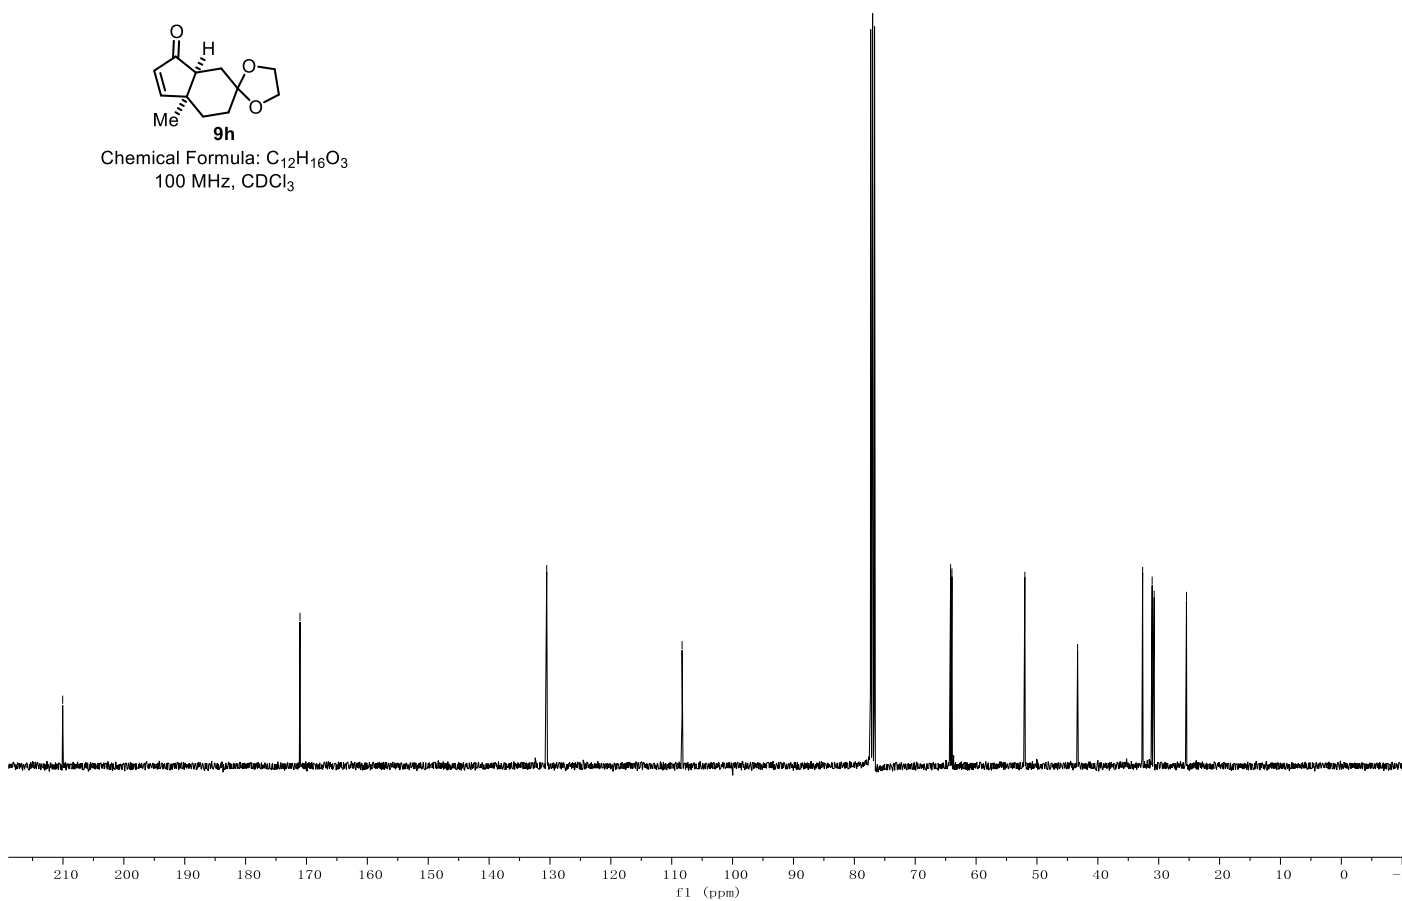

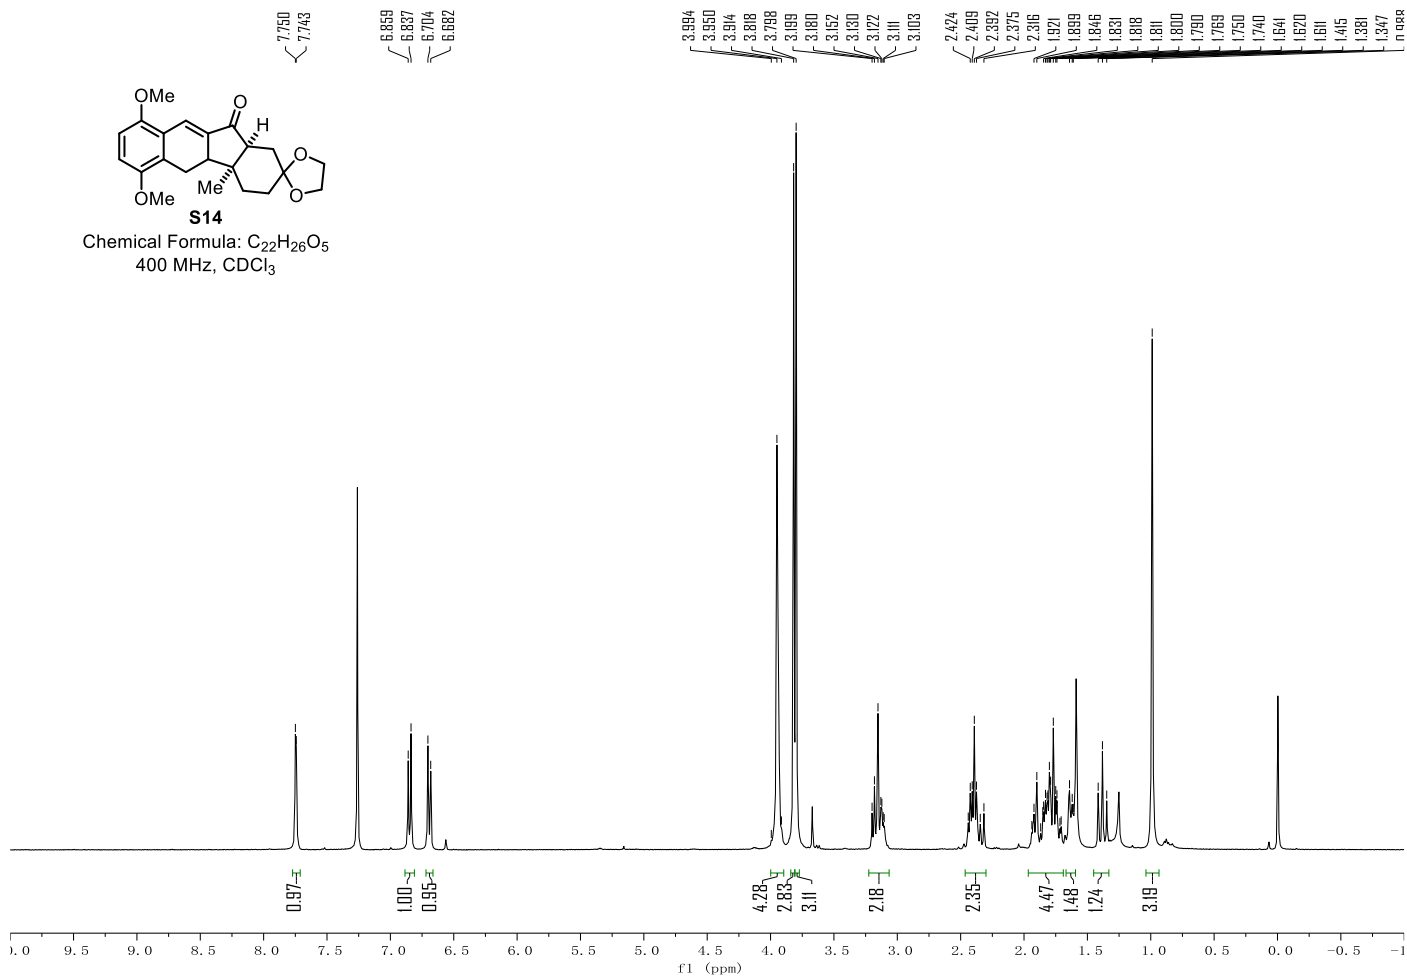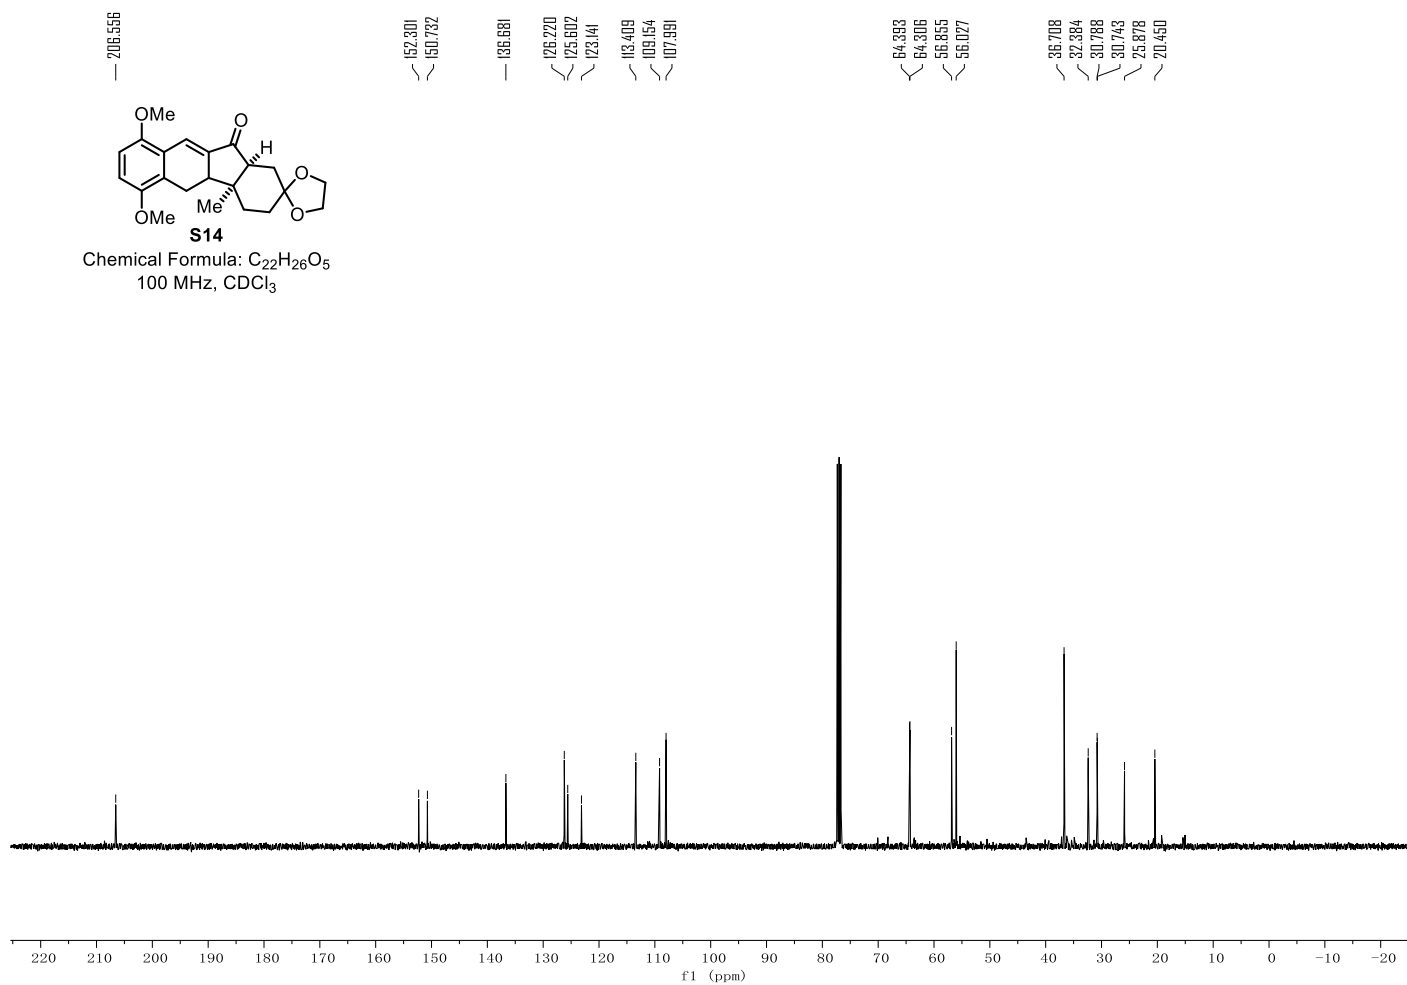

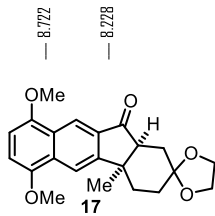

Chemical Formula: C<sub>22</sub>H<sub>24</sub>O<sub>5</sub>  
500 MHz, CDCl<sub>3</sub>

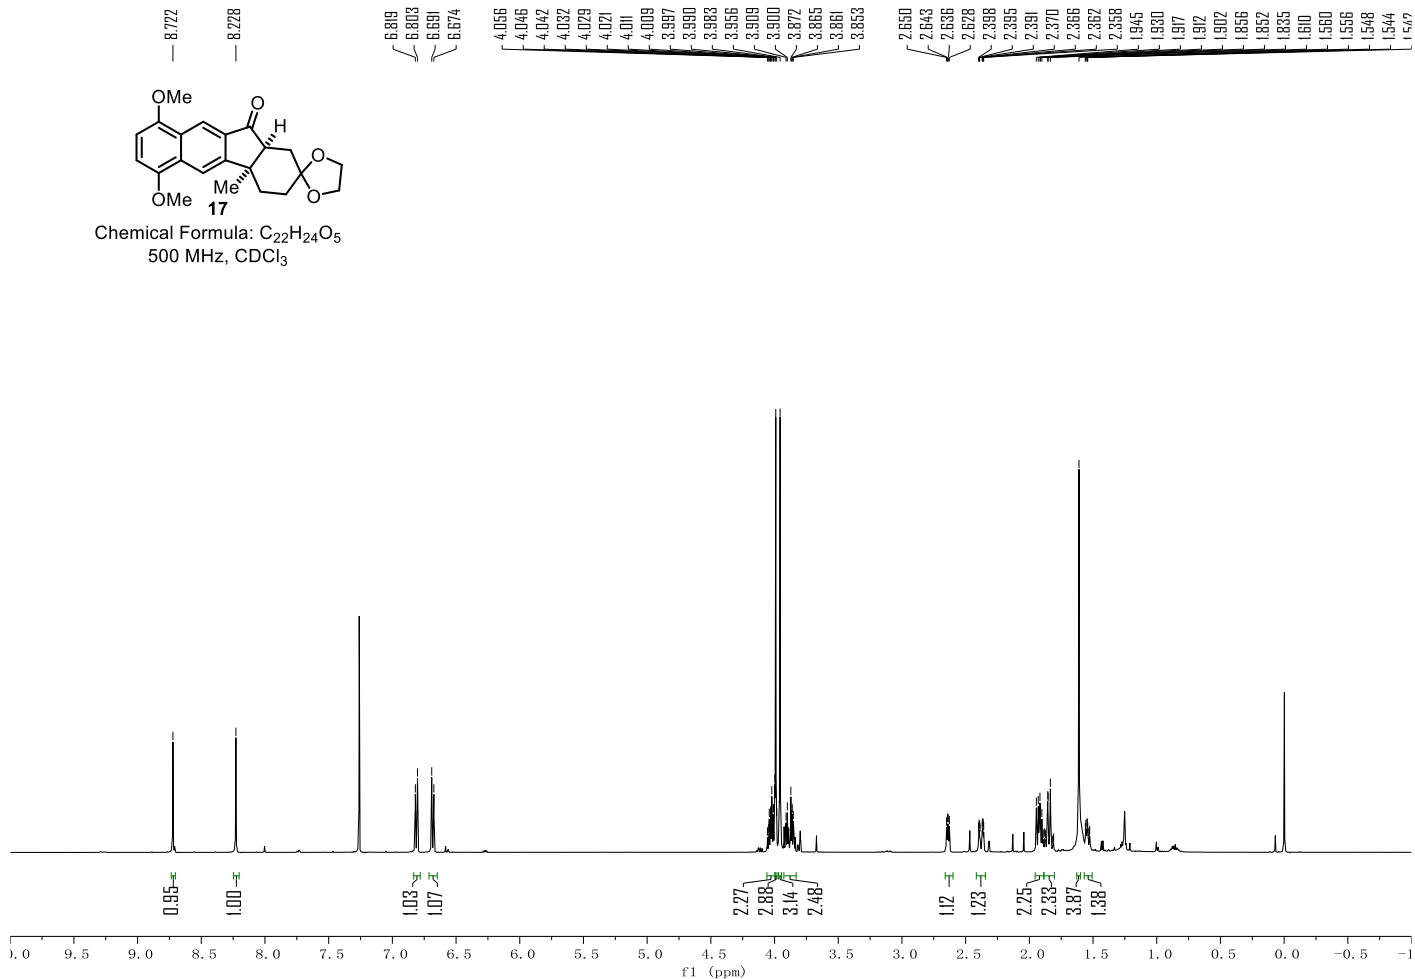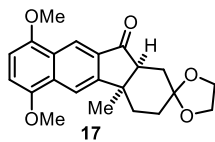

Chemical Formula: C<sub>22</sub>H<sub>24</sub>O<sub>5</sub>  
125 MHz, CDCl<sub>3</sub>

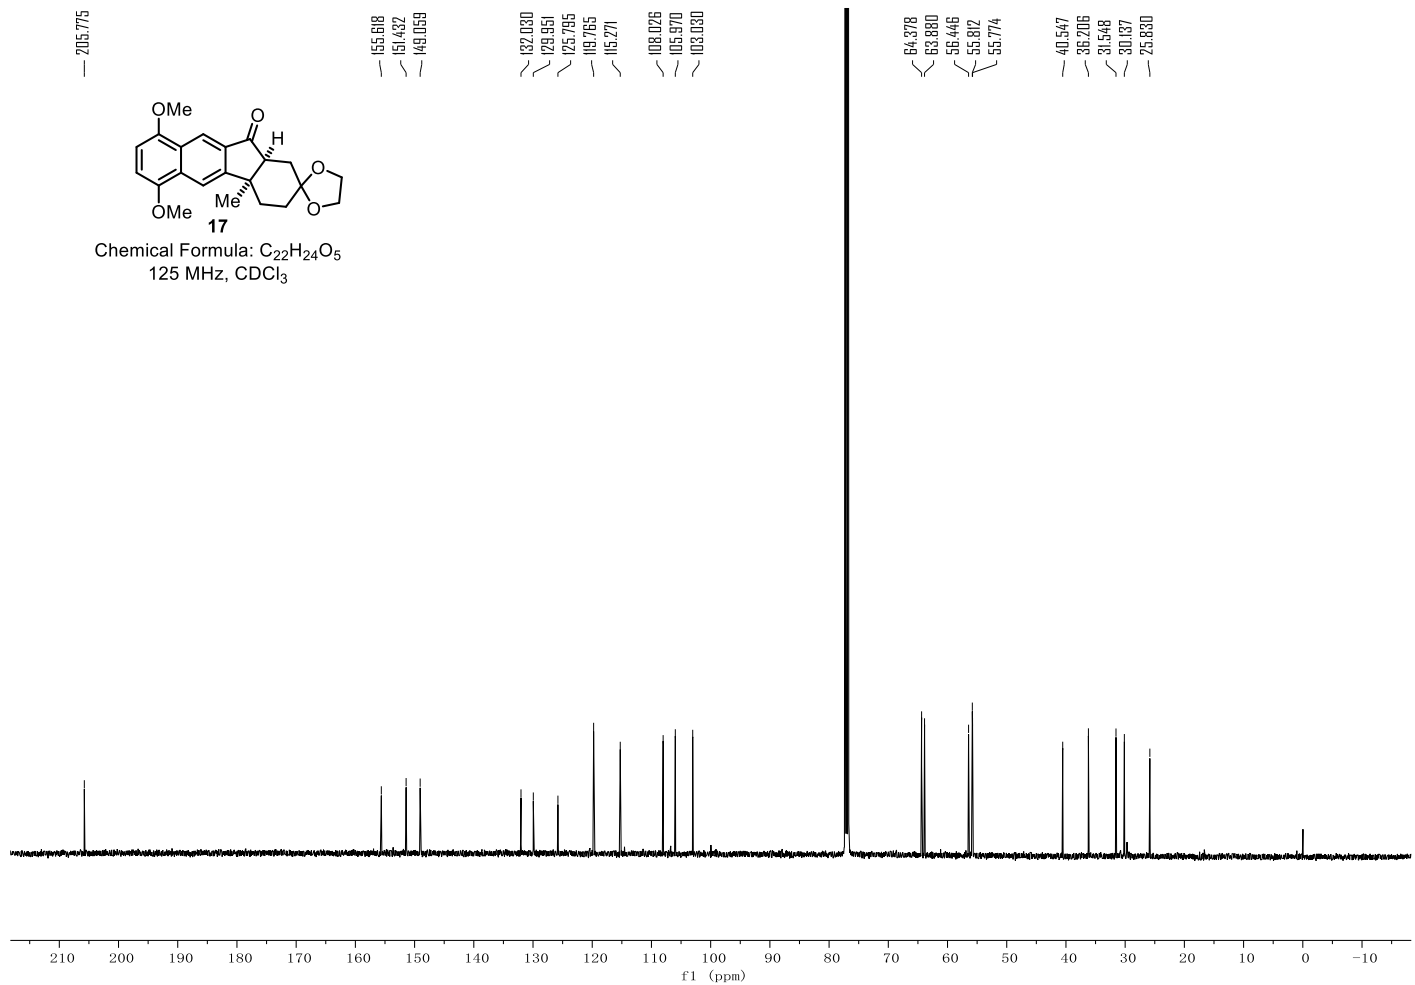

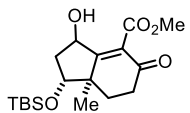

**S17**

Chemical Formula: C<sub>18</sub>H<sub>30</sub>O<sub>5</sub>Si  
500 MHz, CDCl<sub>3</sub>

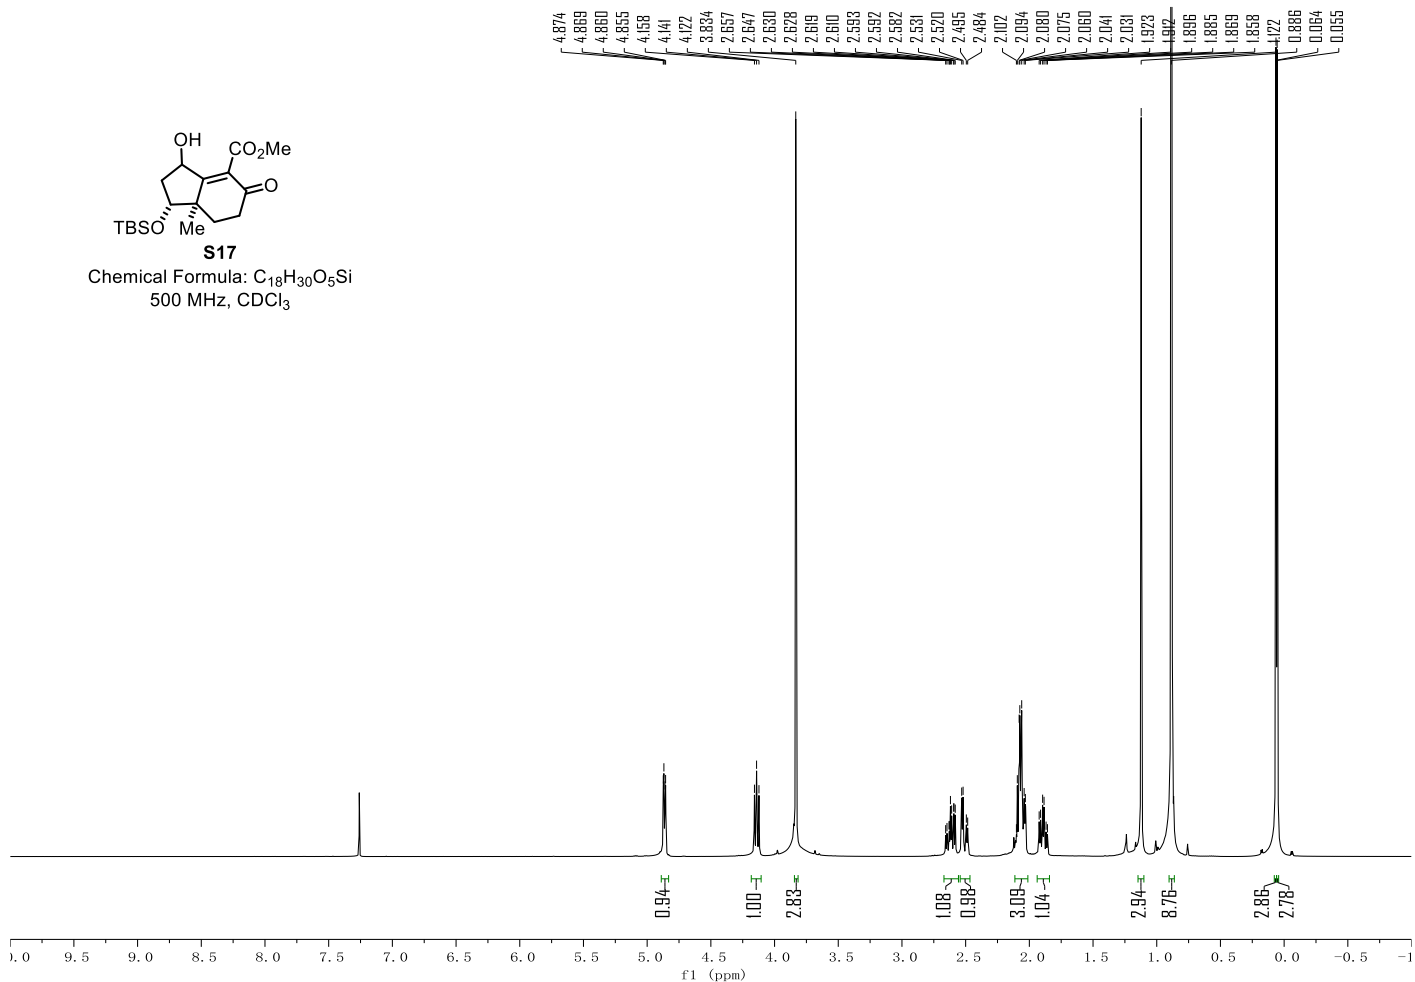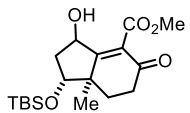

**S17**

Chemical Formula: C<sub>18</sub>H<sub>30</sub>O<sub>5</sub>Si  
125 MHz, CDCl<sub>3</sub>

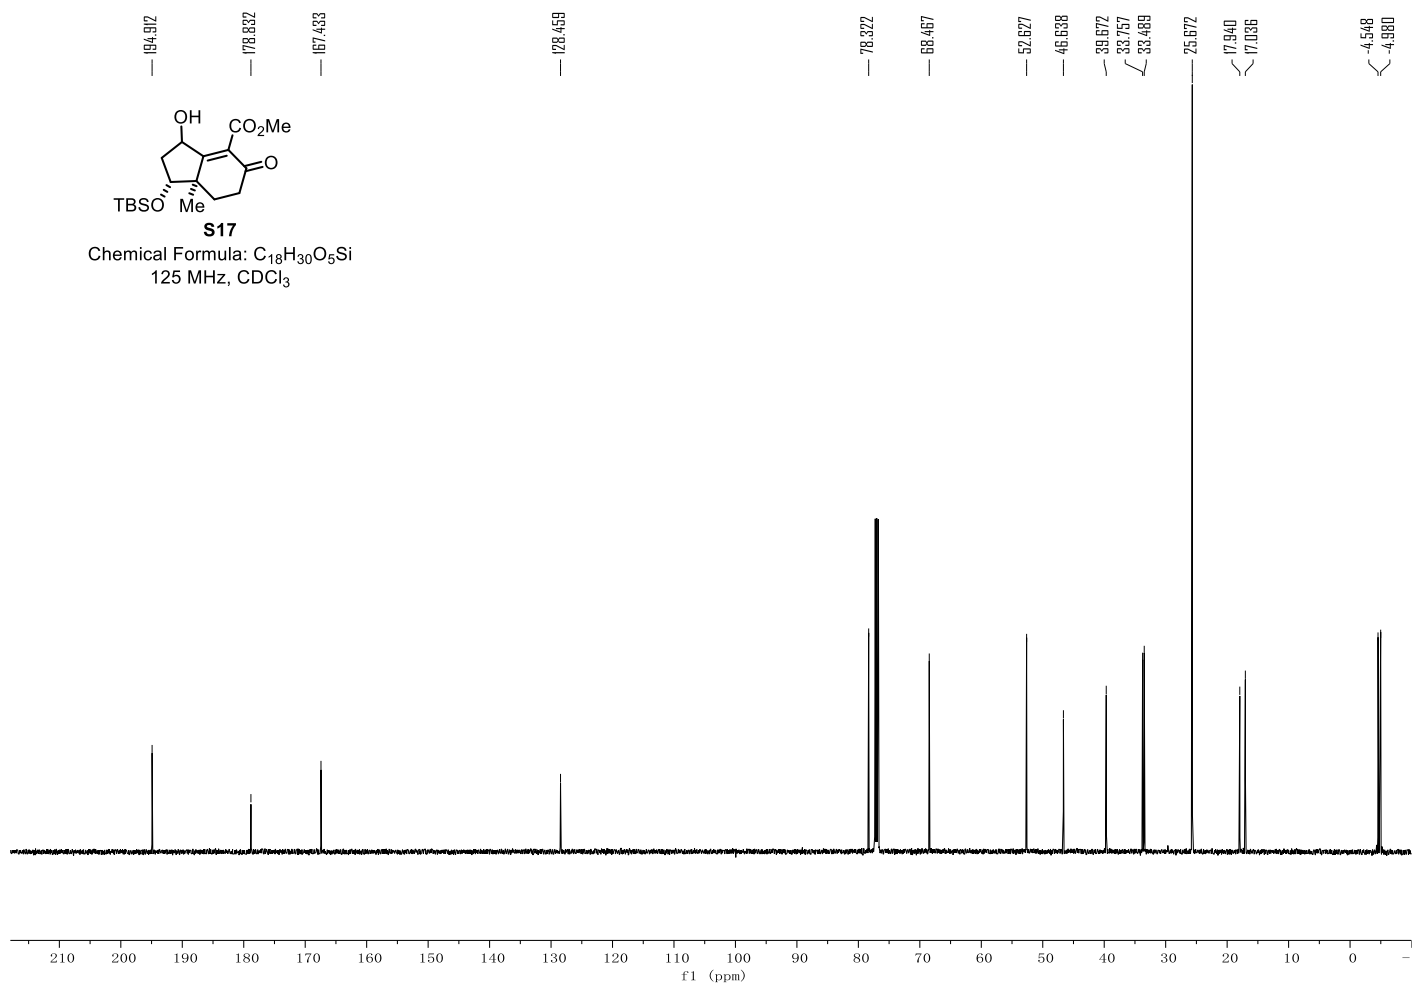

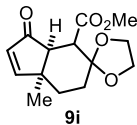

9i

Chemical Formula: C<sub>14</sub>H<sub>18</sub>O<sub>5</sub>  
400 MHz, CDCl<sub>3</sub>

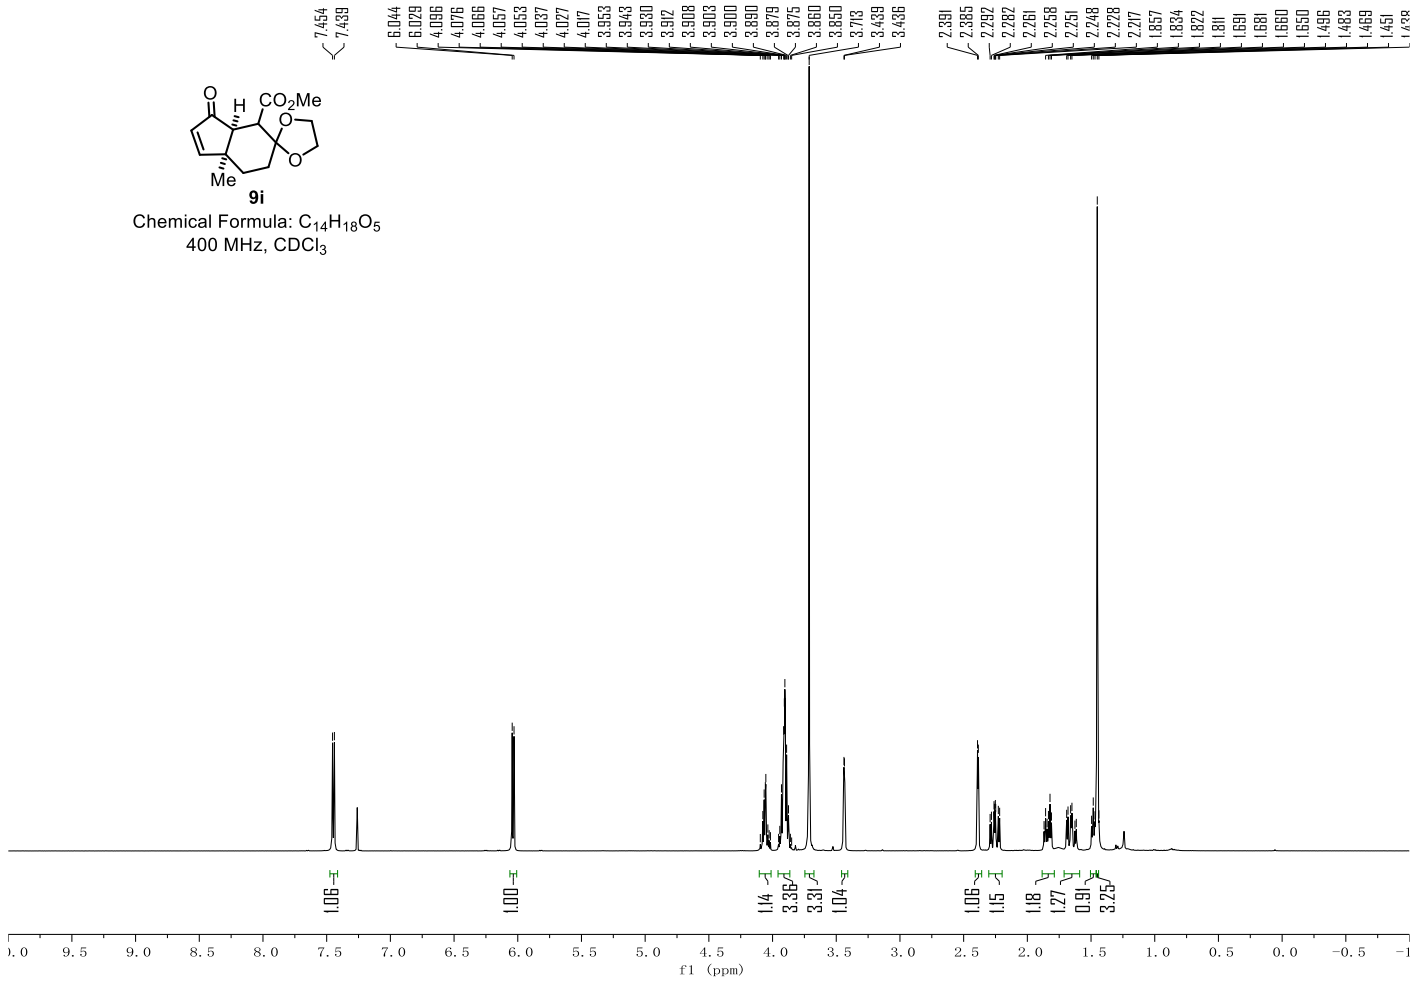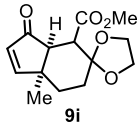

9i

Chemical Formula: C<sub>14</sub>H<sub>18</sub>O<sub>5</sub>  
100 MHz, CDCl<sub>3</sub>

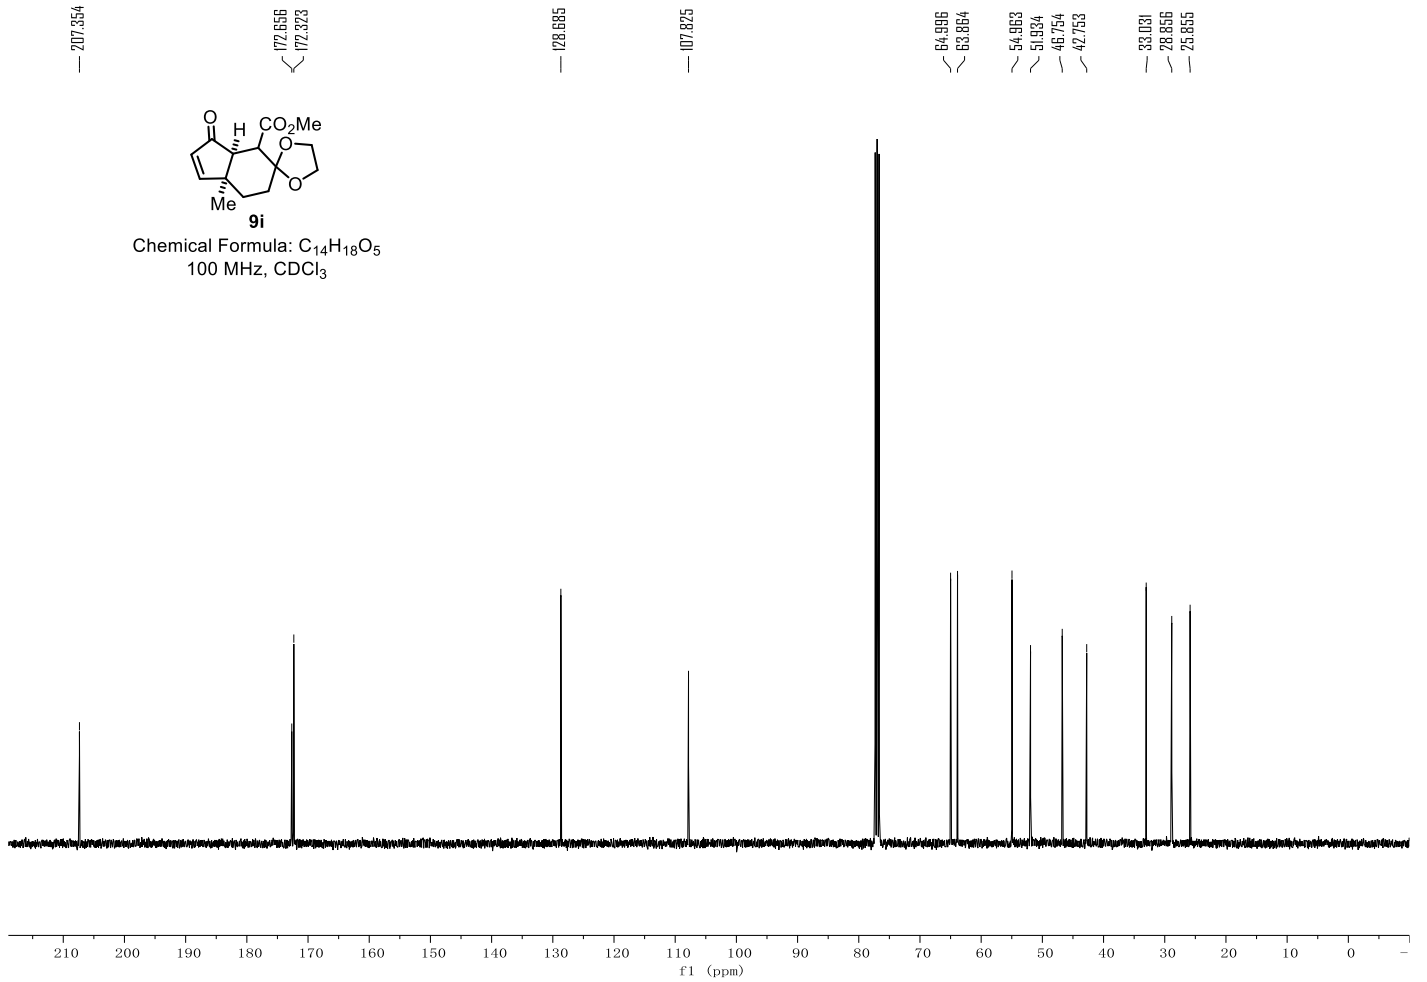

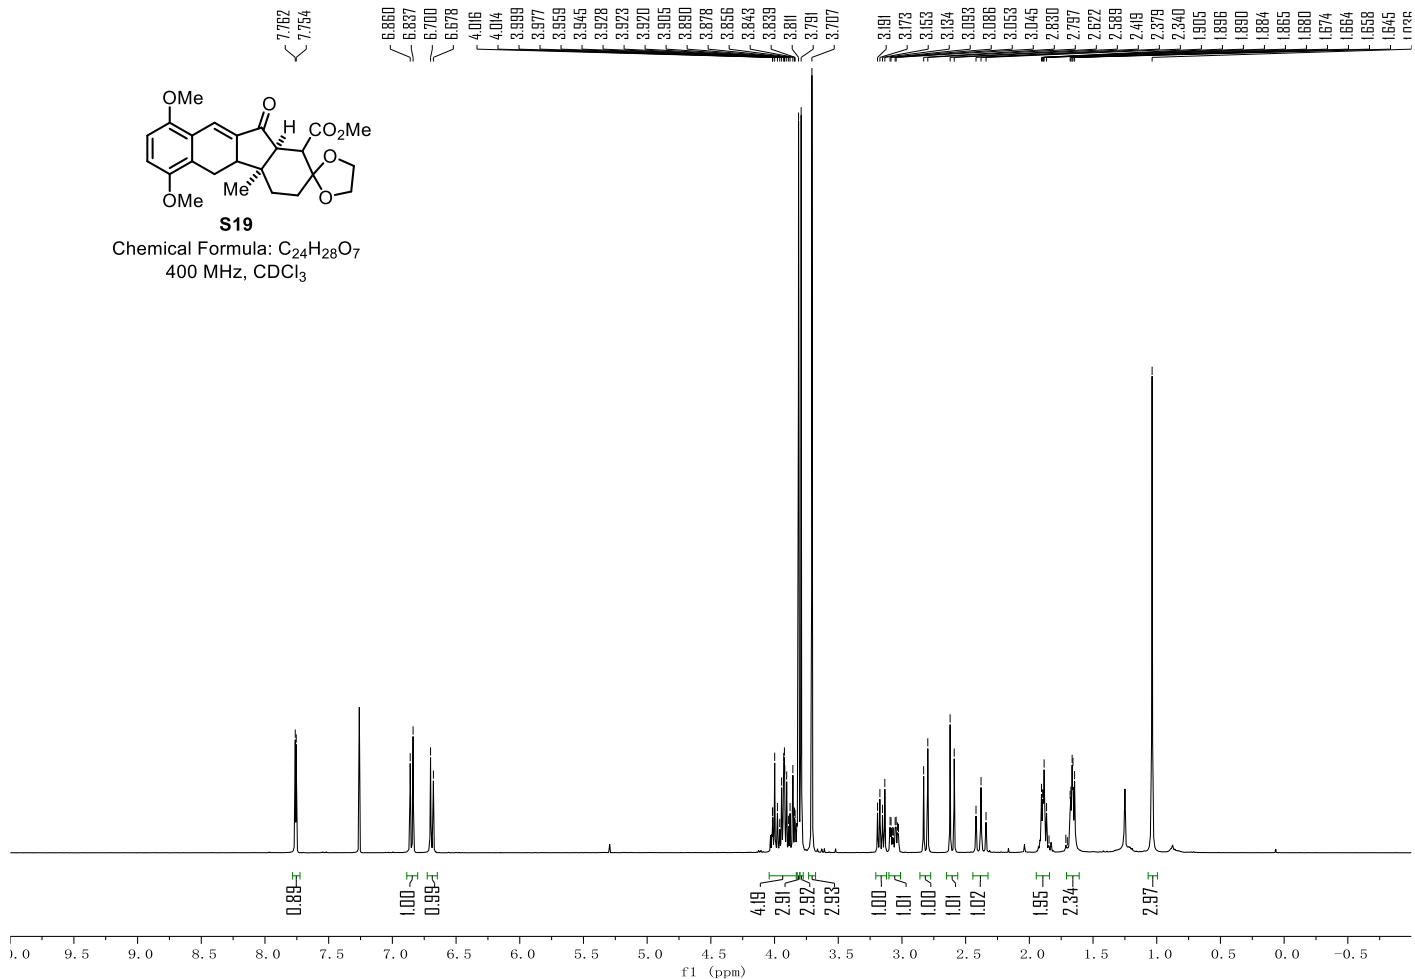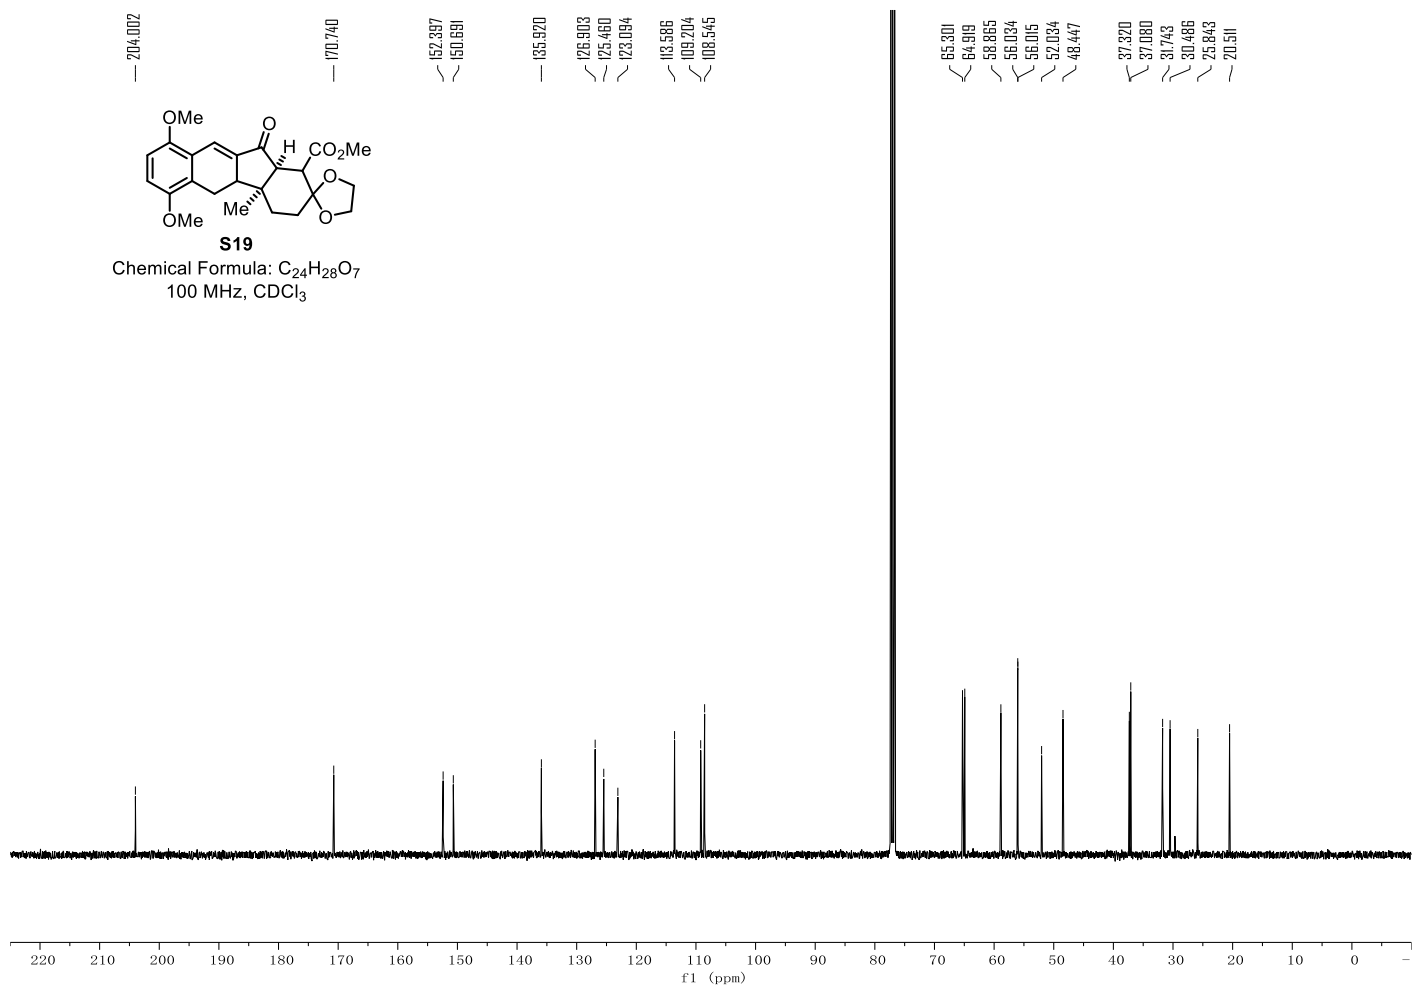

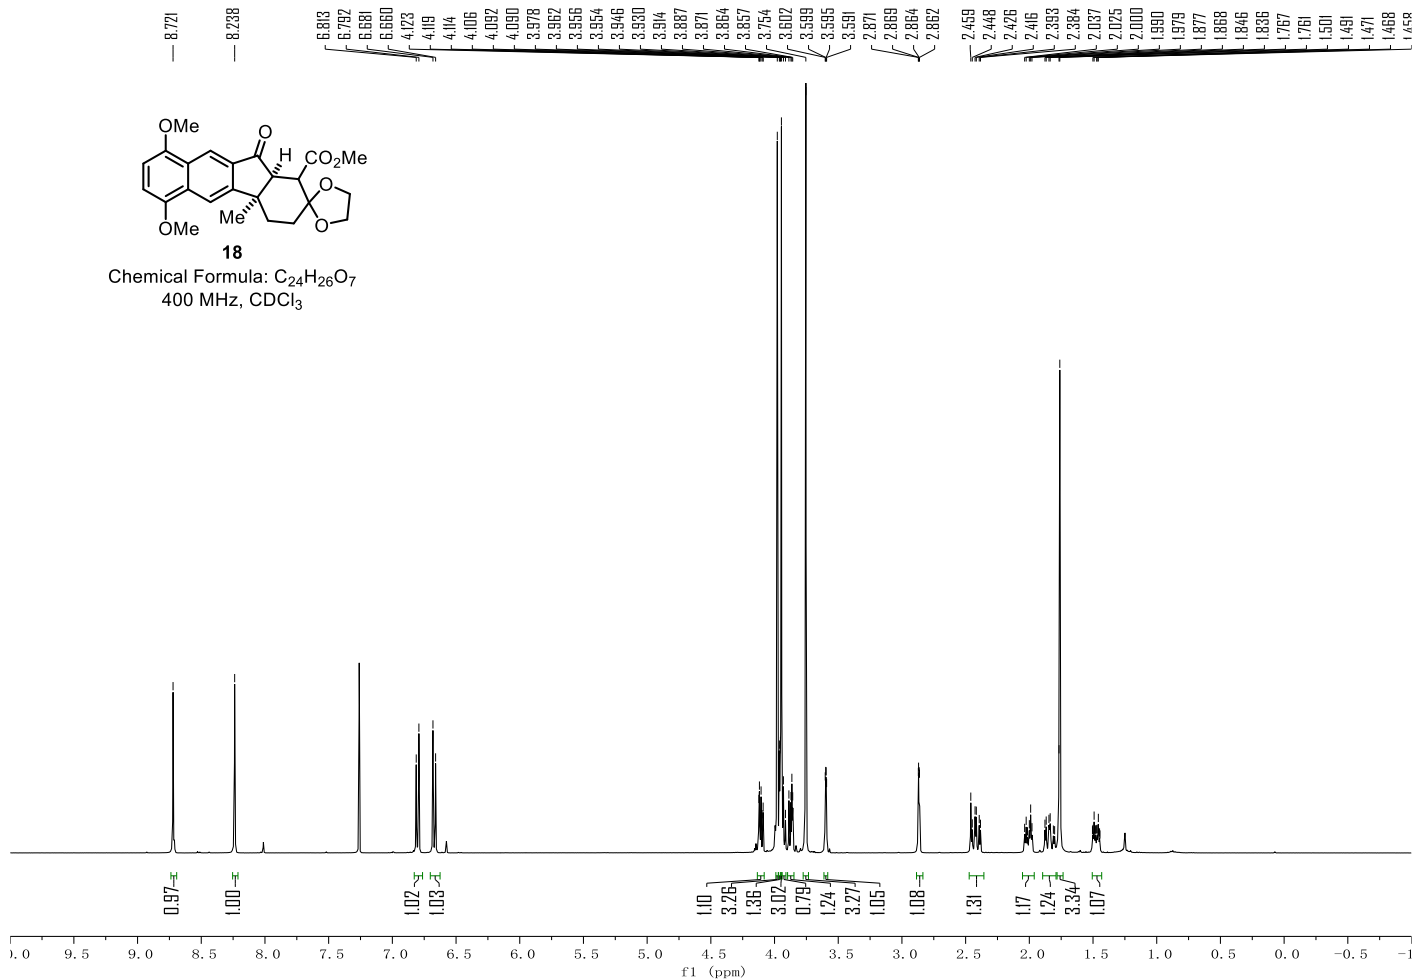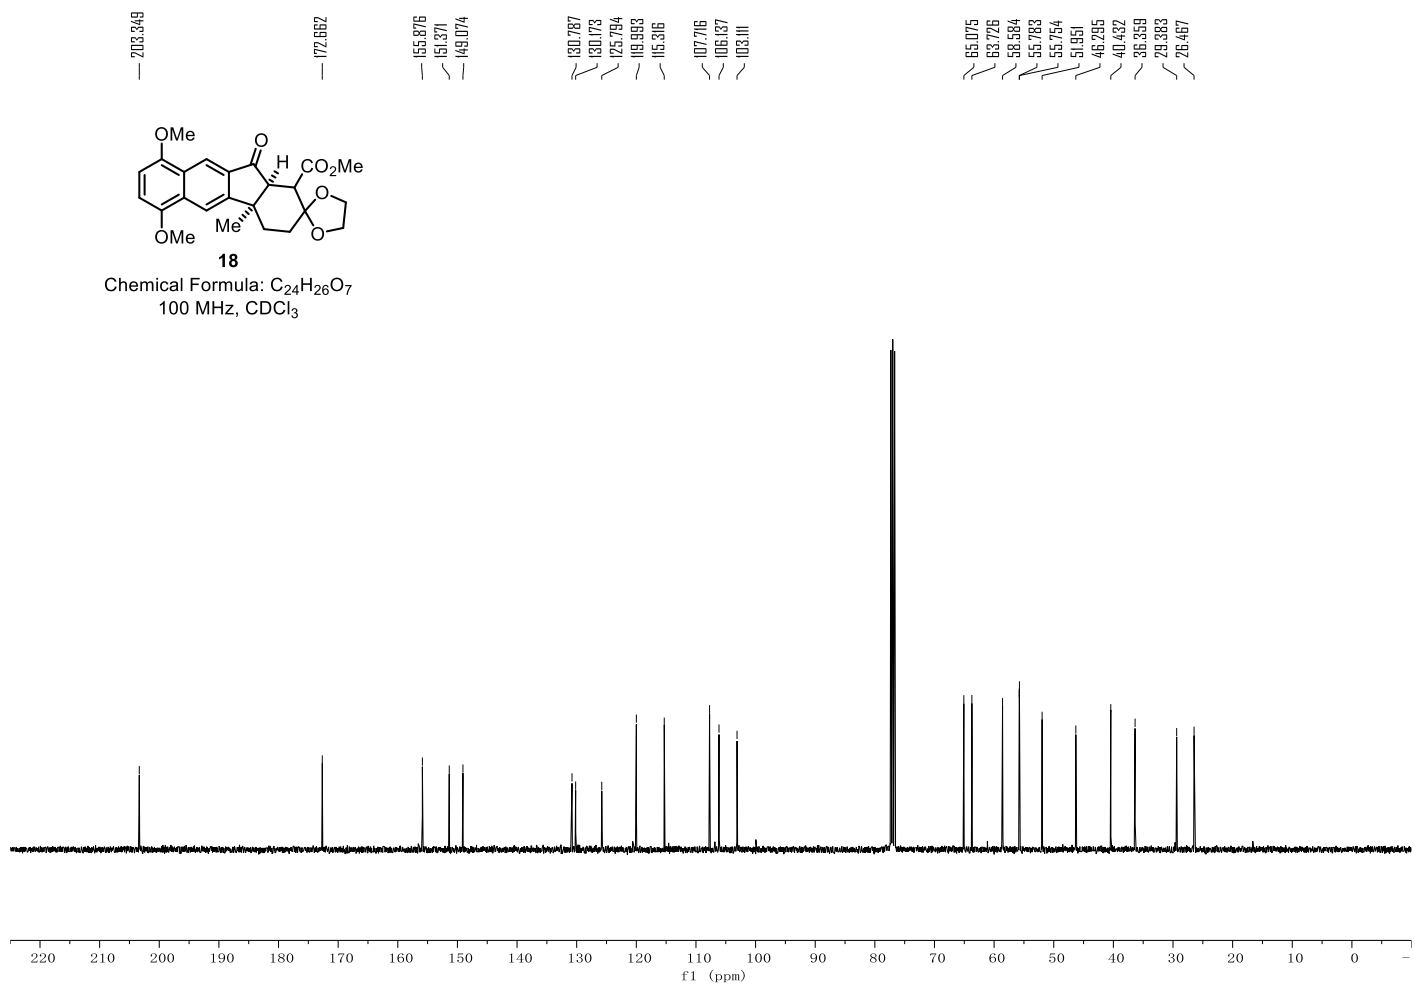

Supplement: d0qo01346c1.pdf [file d0qo01346c1.pdf]
